# Supplementary material for: Organocatalytic diastereo- and atropo-selective construction of eight-membered bridged (hetero)biaryls via asymmetric intramolecular [3 + 2] cycloaddition
Source: Royal Society of Chemistry journal article supplement (doi:10.1039/d4sc01892c), 2024-01-01
Supplement: d4sc01892c1.pdf [file d4sc01892c1.pdf]

## Organocatalytic diastereo- and atroposelective construction of eight-membered bridged (hetero)biaryls via asymmetric intramolecular [3+2] cycloaddition

Yue Wang,<sup>a</sup> Yue Huang,<sup>a</sup> Xiaoze Bao,<sup>b</sup> Xingfu Wei,<sup>a</sup> Shiqiang Wei,<sup>a</sup> Jingping Qu<sup>a</sup> and Baomin Wang\*<sup>a</sup>

<sup>a</sup>State Key Laboratory of Fine Chemicals, Department of Pharmaceutical Engineering, School of Chemical Engineering, Dalian University of Technology, Dalian 116024, P. R. China

<sup>b</sup>College of Pharmaceutical Science & Collaborative Innovation Center of Yangtze River Delta Region Green Pharmaceuticals, Zhejiang University of Technology, Hangzhou 310014, P. R. China.

Email: bmwang@dlut.edu.cn

### Contents

|                                                                                                  |      |
|--------------------------------------------------------------------------------------------------|------|
| 1. General information.....                                                                      | S1   |
| 2. General procedures for biaryl aldehydes <b>3</b> and N-Boc biaryl benzylamine <b>11</b> ..... | S1   |
| 3. General procedures for N-aryl-2-formylpyrroles <b>5</b> .....                                 | S9   |
| 4. Optimization of reaction conditions.....                                                      | S15  |
| 5. General procedures for products <b>4/6</b> and derivatizations.....                           | S16  |
| 6. References.....                                                                               | S81  |
| 7. NMR spectra for compounds.....                                                                | S82  |
| 8. X-ray crystal structures.....                                                                 | S183 |

## 1. General information

Unless otherwise noted, materials were purchased from commercial suppliers and used without further purification. Column chromatography was performed on silica gel (200~300 mesh). Diastereoisomeric ratios (dr) were determined by  $^1\text{H}$  NMR. Enantiomeric excesses (ee) were determined by HPLC using corresponding commercial chiral columns as stated at 30 °C with UV detector at 254 nm. Optical rotations were reported as follows:  $[\alpha]_D^T$  (c g/100 mL, solvent). All  $^1\text{H}$  NMR spectra were recorded on Bruker Avance II 400 MHz or Bruker Avance III 600 MHz.  $^{19}\text{F}$  NMR spectra were recorded on Bruker Avance II 376 MHz and Bruker Avance III 565 MHz.  $^{13}\text{C}$  NMR spectra were recorded on Bruker Avance II 101 MHz or Bruker Avance III 151 MHz with chemical shifts reported as ppm (in  $\text{CDCl}_3$ , TMS as internal standard). Data for  $^1\text{H}$  NMR are recorded as follows: chemical shift ( $\delta$ , ppm), multiplicity (s = singlet, d = doublet, t = triplet, m = multiplet, br = broad singlet, dd = double doublet, coupling constants in Hz, integration). HRMS (ESI) was obtained with a HRMS/MS instrument (LTQ Orbitrap XLTM).

3-Amino oxindole hydrochlorides **2** were prepared according to literature methods.<sup>[1]</sup>

## 2. General procedures for biaryl aldehydes **3** and N-Boc biaryl benzylamine **11**

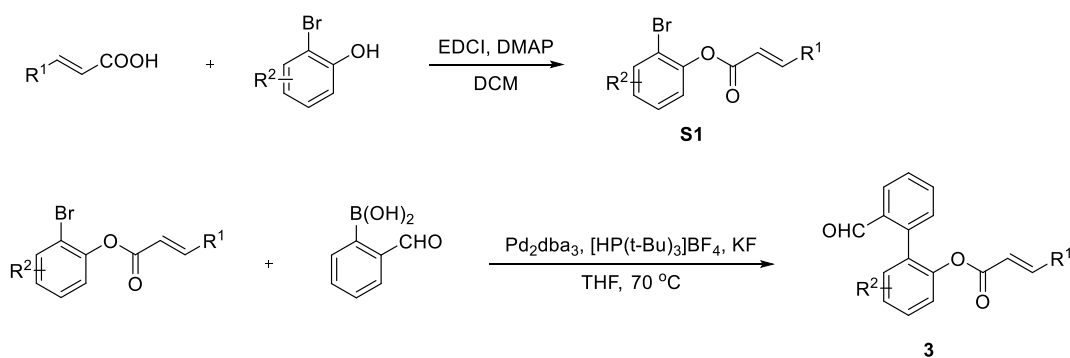

To a round-bottom flask with a magnetic stirring bar, carboxylic acid (1.1 equiv), phenol (1 equiv), DMAP (5 mol%) and EDC·HCl (1.1 equiv) were added, and the resulting mixture was stirred in DCM (0.2 M) overnight at room temperature. After the reaction reached completion,  $\text{H}_2\text{O}$  was added. The organic layer was then separated, and the aqueous layer was extracted with EtOAc three times. The organic layer was successively washed with brine. After drying over  $\text{Na}_2\text{SO}_4$ , the resulting solution was concentrated under reduced pressure. The crude mixture was purified by

flash chromatography on silica gel with eluent of hexane/ethyl acetate (100:1) affording the corresponding pure compound **S1**.

$\text{Pd}_2(\text{dba})_3$  (0.5 mol%),  $[\text{HP}(t\text{-Bu})_3]\text{BF}_4$  (1.2 mol%), **S1** (1.0 equiv), the boronic acid (1.5 equiv) and  $\text{KF}\cdot 2\text{H}_2\text{O}$  (3.3 equiv) were added to a flask. The reaction flask was degassed three times with nitrogen and then THF (0.2 M) was added using a syringe, and the resulting solution was stirred at 70 °C for 10 h. After the reaction was completed (TLC), the mixture was diluted with  $\text{Et}_2\text{O}$  and filtered through a plug of silica gel. The crude mixture was purified by flash chromatography on silica gel with eluent of hexane/ethyl acetate (100:1) affording the corresponding pure compound **3**.

**S3** were synthesized according to the literature method.<sup>[2]</sup>

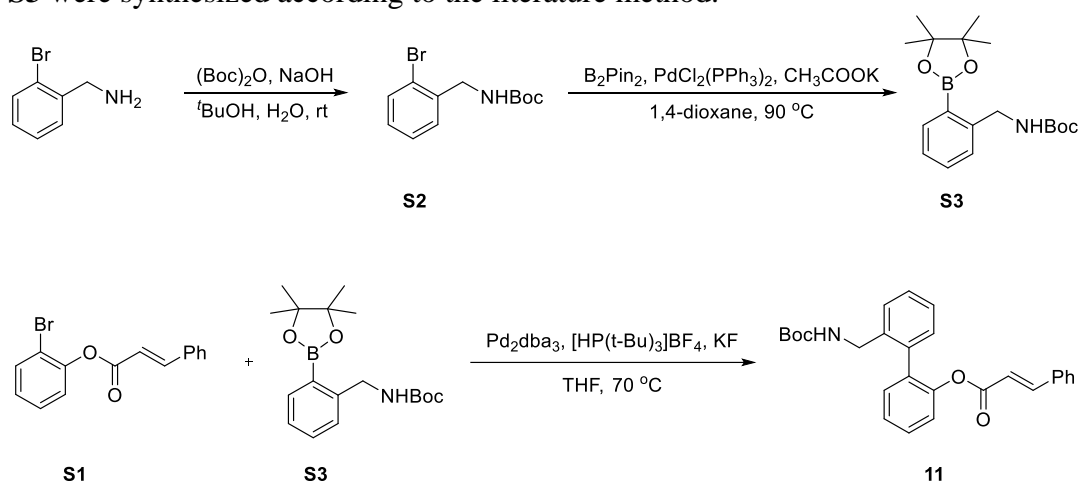

The 2-bromobenzylamine (1.0 equiv) was dissolved in  $t\text{-BuOH}/\text{H}_2\text{O}$  (v/v=1, 0.5 M). NaOH (2.0 equiv) and di-*tert*-butyl dicarbonate (1.2 equiv) were successively added. The mixture was stirred for 3 h at room temperature. The reaction was quenched with  $\text{H}_2\text{O}$  (5 mL) and extracted with  $\text{EtOAc}$  (5 mL $\times$ 2). The combined organic layers were washed with brine, dried over  $\text{Na}_2\text{SO}_4$ , filtered and then concentrated under reduced pressure. The residue was purified by flash chromatography on silica gel (eluent: petroleum ether/ethyl acetate = 30/1) affording the corresponding pure compound **S2**.

$\text{PdCl}_2(\text{PPh}_3)_2$  (0.5 mol%), **S2** (1.0 equiv), bis(pinacolato)diboron (1.5 equiv) and KOAc (2 equiv) were added to a flask. The reaction flask was degassed three times with nitrogen and then 1,4-dioxane (0.3 M) was added using a syringe, and the resulting solution was stirred at 90 °C for 12 h. After the reaction was completed (TLC), the mixture was diluted with DCM and filtered through a plug of silica gel. The crude mixture was purified by flash chromatography on silica gel with eluent of hexane/ethyl acetate (100:1) affording the corresponding pure compound **S3**.

Pd<sub>2</sub>(dba)<sub>3</sub> (0.5 mol%), [HP(*t*-Bu)<sub>3</sub>]BF<sub>4</sub> (1.2 mol%), **S1** (1.0 equiv), **S3** (1.5 equiv) and KF·2H<sub>2</sub>O (3.3 equiv) were added to a flask. The reaction flask was degassed three times with nitrogen and then THF (0.2 M) was added using a syringe, and the resulting solution was stirred at 70 °C for 10 h. After the reaction was completed (TLC), the mixture was diluted with Et<sub>2</sub>O and filtered through a plug of silica gel. The crude mixture was purified by flash chromatography on silica gel with eluent of hexane/ethyl acetate (100:1) affording the corresponding pure compound **11**.

### 2'-Formyl-[1,1'-biphenyl]-2-yl cinnamate (**3a**)

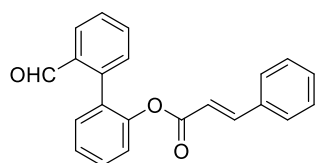

**3a**

White solid; mp 110.1 – 110.9 °C; <sup>1</sup>H NMR (400 MHz, CDCl<sub>3</sub>) δ 9.97 (s, 1H), 8.02 (d, *J* = 7.7 Hz, 1H), 7.65 – 7.53 (m, 3H), 7.53 – 7.46 (m, 3H), 7.42 (d, *J* = 10.3 Hz, 6H), 7.32 (d, *J* = 8.1 Hz, 1H), 6.32 (d, *J* = 16.0 Hz, 1H); <sup>13</sup>C NMR (101 MHz, CDCl<sub>3</sub>) δ 192.3, 164.7, 148.4, 146.9, 140.7, 133.9, 133.7, 133.7, 131.6, 131.3, 131.1, 130.8, 129.9, 129.0, 128.4, 127.1, 126.3, 122.8, 116.3; HRMS (ESI) *m/z* Calcd. for C<sub>22</sub>H<sub>17</sub>O<sub>3</sub><sup>+</sup> ([M+H]<sup>+</sup>) 329.1172, Found 329.1170.

### 2'-Formyl-[1,1'-biphenyl]-2-yl (E)-3-(*o*-tolyl)acrylate (**3b**)

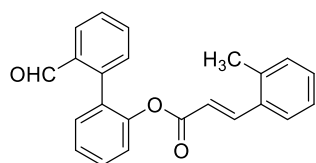

**3b**

White solid; mp 101.4.1 – 102.5 °C; <sup>1</sup>H NMR (400 MHz, CDCl<sub>3</sub>) δ 9.93 (s, 1H), 7.98 (d, *J* = 7.8 Hz, 1H), 7.82 (d, *J* = 15.9 Hz, 1H), 7.63 – 7.58 (m, 1H), 7.54 – 7.49 (m, 1H), 7.47 – 7.43 (m, 2H), 7.42 – 7.35 (m, 3H), 7.30 (d, *J* = 8.5 Hz, 1H), 7.26 (d, *J* = 6.6 Hz, 1H), 7.19 – 7.17 (m, 2H), 6.20 (d, *J* = 15.9 Hz, 1H), 2.36 (s, 3H); <sup>13</sup>C NMR (101 MHz, CDCl<sub>3</sub>) δ 192.1, 164.6, 148.5, 144.3, 140.7, 138.0, 133.8, 133.6, 132.9, 131.5, 131.3, 131.1, 130.9, 130.5, 129.8, 128.3, 127.0, 126.5, 126.4, 126.3, 122.8, 117.4, 19.7; HRMS (ESI) *m/z* Calcd. for C<sub>23</sub>H<sub>19</sub>O<sub>3</sub><sup>+</sup> ([M+H]<sup>+</sup>) 343.1329, Found 343.1325.

### 2'-Formyl-[1,1'-biphenyl]-2-yl (E)-3-(2-methoxyphenyl)acrylate (**3c**)

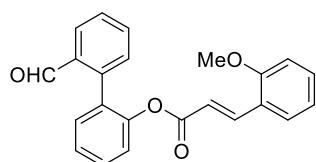

**3c**

White solid; mp 80.1 – 81.3 °C; <sup>1</sup>H NMR (400 MHz, CDCl<sub>3</sub>) δ 9.93 (s, 1H), 7.98 (d, *J* = 7.7 Hz, 1H), 7.85 (d, *J* = 16.1 Hz, 1H), 7.61 – 7.55 (m, 1H), 7.52 – 7.46 (m, 1H), 7.45 – 7.36 (m, 5H), 7.35 – 7.30 (m, 1H), 7.26 (d, *J* = 11.7 Hz, 1H), 6.93 – 6.90 (m, 1H), 6.87 (d, *J* = 8.3 Hz, 1H), 6.40 (d, *J* = 16.1 Hz, 1H), 3.84 (s, 3H); <sup>13</sup>C NMR (101 MHz, CDCl<sub>3</sub>) δ 192.2, 165.2, 158.6, 148.6, 142.3, 140.9, 133.8, 133.6, 132.0, 131.6, 131.3, 131.1, 129.8, 129.4, 128.2,

127.0, 126.1, 122.9, 122.9, 120.7, 116.8, 111.2, 55.5; HRMS (ESI)  $m/z$  Calcd. for  $C_{23}H_{18}NaO_4^+$  ( $[M+Na]^+$ ) 381.1097, Found 381.1093.

### 2'-Formyl-[1,1'-biphenyl]-2-yl (E)-3-(m-tolyl)acrylate (3d)

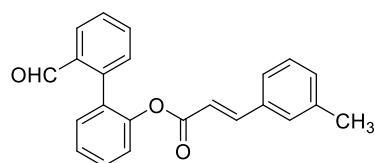

3d

White solid; mp 108.4 – 109.8 °C;  $^1H$  NMR (400 MHz,  $CDCl_3$ )  $\delta$  9.93 (s, 1H), 7.98 (dd,  $J = 7.8, 1.1$  Hz, 1H), 7.62 – 7.56 (m, 1H), 7.56 – 7.47 (m, 2H), 7.46 – 7.42 (m, 1H), 7.41 – 7.35 (m, 3H), 7.29 – 7.24 (m, 4H), 7.19 (dd,  $J = 5.9, 2.7$  Hz, 1H), 6.26 (d,  $J = 16.0$  Hz, 1H), 2.34 (s, 3H);  $^{13}C$  NMR (101 MHz,  $CDCl_3$ )  $\delta$  192.2, 164.7, 148.5, 147.0, 140.7, 138.6, 133.9, 133.8, 133.6, 131.6, 131.6, 131.3, 131.1, 129.8, 128.9, 128.8, 128.3, 127.0, 126.3, 125.6, 122.8, 116.1, 21.3; HRMS (ESI)  $m/z$  Calcd. for  $C_{23}H_{18}NaO_3^+$  ( $[M+Na]^+$ ) 365.1148, Found 365.1143.

### 2'-Formyl-[1,1'-biphenyl]-2-yl (E)-3-(p-tolyl)acrylate (3e)

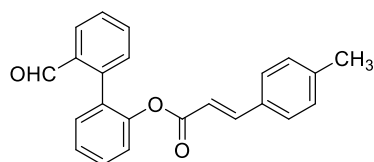

3e

White solid; mp 88.8 – 89.5 °C;  $^1H$  NMR (400 MHz,  $CDCl_3$ )  $\delta$  9.93 (s, 1H), 7.98 (d,  $J = 7.7$  Hz, 1H), 7.61 – 7.56 (m, 1H), 7.55 – 7.47 (m, 2H), 7.43 (dd,  $J = 13.0, 5.4$  Hz, 1H), 7.38 – 7.33 (m, 5H), 7.28 (d,  $J = 8.0$  Hz, 1H), 7.16 (d,  $J = 7.9$  Hz, 2H), 6.23 (d,  $J = 16.0$  Hz, 1H), 2.35 (s, 3H);  $^{13}C$  NMR (101 MHz,  $CDCl_3$ )  $\delta$  192.3, 164.9, 148.5, 146.9, 141.4, 140.8, 133.8, 133.7, 131.6, 131.3, 131.2, 131.1, 129.8, 129.7, 128.4, 128.3, 127.0, 126.3, 122.8, 115.2, 21.5; HRMS (ESI)  $m/z$  Calcd. for  $C_{23}H_{18}NaO_3^+$  ( $[M+Na]^+$ ) 365.1148, Found 365.1143.

### 2'-Formyl-[1,1'-biphenyl]-2-yl (E)-3-(4-methoxyphenyl)acrylate (3f)

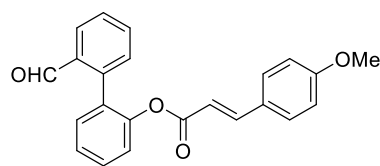

3f

White solid; mp 112.1 – 112.9 °C;  $^1H$  NMR (400 MHz,  $CDCl_3$ )  $\delta$  9.96 (s, 1H), 8.01 (d,  $J = 7.7$  Hz, 1H), 7.65 – 7.61 (m, 1H), 7.57 – 7.50 (m, 2H), 7.50 – 7.39 (m, 6H), 7.30 (d,  $J = 8.1$  Hz, 1H), 6.91 (d,  $J = 8.5$  Hz, 2H), 6.17 (d,  $J = 15.9$  Hz, 1H), 3.85 (s, 3H);  $^{13}C$  NMR (101 MHz,  $CDCl_3$ )  $\delta$  192.4, 165.0, 161.8, 148.5, 146.6, 140.8, 133.7, 133.7, 131.6, 131.3, 131.1, 130.1, 129.8, 128.3, 127.0, 126.6, 126.2, 122.8, 114.4, 113.6, 55.4; HRMS (ESI)  $m/z$  Calcd. for  $C_{23}H_{18}NaO_4^+$  ( $[M+H]^+$ ) 381.1097, Found 381.1093.

### 2'-Formyl-[1,1'-biphenyl]-2-yl (E)-3-(4-fluorophenyl)acrylate (3g)

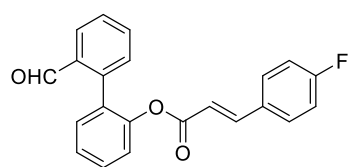

3g

White solid; mp 86.6 – 87.4 °C; <sup>1</sup>H NMR (400 MHz, CDCl<sub>3</sub>) δ 9.93 (s, 1H), 7.99 (dd, *J* = 7.8, 0.9 Hz, 1H), 7.64 – 7.58 (m, 1H), 7.55 – 7.49 (m, 2H), 7.48 – 7.38 (m, 6H), 7.28 (d, *J* = 7.9 Hz, 1H), 7.09 – 7.03 (m, 2H), 6.20 (d, *J* = 16.0 Hz, 1H); <sup>13</sup>C NMR (101 MHz, CDCl<sub>3</sub>) δ 192.2, 164.5, 164.2 (d, *J* = 252.5 Hz), 148.4, 145.5, 140.7, 133.8, 133.6, 131.6, 131.3, 131.1, 130.3, 130.2, 130.2, 129.8, 128.3, 127.0, 126.3, 122.7, 116.1 (d, *J* = 21.2 Hz); <sup>19</sup>F NMR (377 MHz, CDCl<sub>3</sub>) δ -108.64; HRMS (ESI) *m/z* Calcd. for C<sub>22</sub>H<sub>15</sub>FNaO<sub>3</sub><sup>+</sup> ([M+Na]<sup>+</sup>) 369.0897, Found 369.0891.

### 2'-Formyl-[1,1'-biphenyl]-2-yl (E)-3-(naphthalen-1-yl)acrylate (3h)

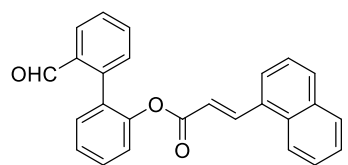

3h

White solid; mp 152.1 – 152.9 °C; <sup>1</sup>H NMR (400 MHz, CDCl<sub>3</sub>) δ 10.00 (s, 1H), 8.39 (d, *J* = 15.8 Hz, 1H), 8.10 – 8.01 (m, 2H), 7.88 (dd, *J* = 10.8, 8.5 Hz, 2H), 7.69 (d, *J* = 7.2 Hz, 1H), 7.66 – 7.59 (m, *J* = 9.8, 2H), 7.58 – 7.51 (m, 2H), 7.51 – 7.41 (m, 5H), 7.37 (d, *J* = 8.0 Hz, 1H), 6.40 (d, *J* = 15.8 Hz, 1H); <sup>13</sup>C NMR (101 MHz, CDCl<sub>3</sub>) δ 192.2, 164.5, 148.5, 143.6, 140.8, 133.9, 133.7, 131.6, 131.4, 131.3, 131.2, 131.1, 129.9, 128.7, 128.4, 127.1, 127.1, 126.3, 125.4, 125.3, 123.3, 122.8, 118.9; HRMS (ESI) *m/z* Calcd. for C<sub>26</sub>H<sub>18</sub>NaO<sub>3</sub><sup>+</sup> ([M+Na]<sup>+</sup>) 401.1148, Found 401.1142.

### 2'-Formyl-[1,1'-biphenyl]-2-yl (E)-3-(thiophen-2-yl)acrylate (3i)

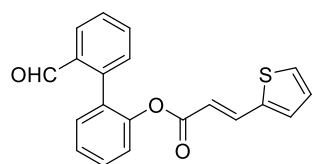

3i

White solid; mp 112.0 – 112.8 °C; <sup>1</sup>H NMR (400 MHz, CDCl<sub>3</sub>) δ 9.91 (s, 1H), 7.99 (d, *J* = 7.7 Hz, 1H), 7.64 (d, *J* = 15.7 Hz, 1H), 7.62 – 7.56 (m, 1H), 7.52 – 7.42 (m, 2H), 7.41 – 7.33 (m, 4H), 7.25 (s, 1H), 7.21 (d, *J* = 3.4 Hz, 1H), 7.02 (dd, *J* = 4.9, 3.7 Hz, 1H), 6.07 (d, *J* = 15.7 Hz, 1H); <sup>13</sup>C NMR (101 MHz, CDCl<sub>3</sub>) δ 192.2, 164.5, 148.4, 140.7, 139.1, 139.1, 133.8, 133.6, 131.7, 131.6, 131.3, 131.1, 129.8, 129.3, 128.3, 128.2, 127.1, 126.2, 122.8, 114.9; HRMS (ESI) *m/z* Calcd. for C<sub>20</sub>H<sub>14</sub>NaO<sub>3</sub>S<sup>+</sup> ([M+Na]<sup>+</sup>) 357.0556, Found 357.0547.

### 2'-Formyl-[1,1'-biphenyl]-2-yl (E)-but-2-enoate (3j)

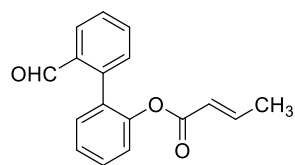

3j

White solid; mp 95.4 – 96.1 °C; <sup>1</sup>H NMR (400 MHz, CDCl<sub>3</sub>) δ 9.87 (s, 1H), 7.98 (dd, *J* = 7.8, 1.0 Hz, 1H), 7.63 – 7.57 (m, 1H), 7.51 – 7.43 (m, 2H), 7.40 – 7.31 (m, 3H), 7.22 (d, *J* = 8.1 Hz, 1H), 6.93 – 6.81 (m, 1H), 5.70 (dd, *J* = 15.5, 1.7 Hz,

1H), 1.80 (dd,  $J = 6.9, 1.6$  Hz, 3H);  $^{13}\text{C}$  NMR (101 MHz,  $\text{CDCl}_3$ )  $\delta$  192.1, 164.0, 148.4, 147.3, 140.8, 133.7, 133.6, 131.5, 131.3, 131.1, 129.8, 128.2, 126.9, 126.2, 122.7, 121.2, 18.1; HRMS (ESI)  $m/z$  Calcd. for  $\text{C}_{17}\text{H}_{14}\text{NaO}_3^+$  ( $[\text{M}+\text{Na}]^+$ ) 289.0835, Found 289.0832.

### 2'-Formyl-3-methyl-[1,1'-biphenyl]-2-yl cinnamate (3k)

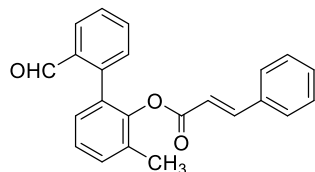

3k

White solid; mp 113.2 – 113.9 °C;  $^1\text{H}$  NMR (400 MHz,  $\text{CDCl}_3$ )  $\delta$  9.92 (s, 1H), 7.96 (d,  $J = 7.7$  Hz, 1H), 7.57 (dd,  $J = 8.3, 7.6$  Hz, 2H), 7.49 – 7.40 (m, 3H), 7.39 – 7.33 (m, 5H), 7.31 – 7.24 (m, 1H), 7.21 (d,  $J = 7.2$  Hz, 1H), 6.29 (d,  $J = 16.0$  Hz, 1H), 2.27 (s, 3H);  $^{13}\text{C}$  NMR (101 MHz,  $\text{CDCl}_3$ )  $\delta$  192.4, 164.2, 147.1, 146.8, 141.1, 133.9, 133.8, 133.6, 131.5, 131.5, 131.4, 131.1, 130.8, 129.1, 129.0, 128.3, 128.2, 126.9, 126.2, 116.0, 16.6; HRMS (ESI)  $m/z$  Calcd. for  $\text{C}_{23}\text{H}_{18}\text{NaO}_3^+$  ( $[\text{M}+\text{Na}]^+$ ) 365.1148, Found 365.1140.

### 2'-Formyl-3-methoxy-[1,1'-biphenyl]-2-yl cinnamate (3l)

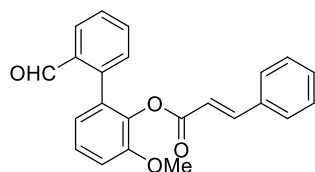

3l

White solid; mp 118.7 – 119.9 °C;  $^1\text{H}$  NMR (400 MHz,  $\text{CDCl}_3$ )  $\delta$  9.99 (s, 1H), 8.02 (d,  $J = 7.7$  Hz, 1H), 7.70 – 7.56 (m, 2H), 7.53 – 7.41 (m, 4H), 7.41 – 7.27 (m, 4H), 7.12 (d,  $J = 8.1$  Hz, 1H), 6.99 (d,  $J = 7.5$  Hz, 1H), 6.39 (d,  $J = 16.0$  Hz, 1H), 3.92 (s, 3H);  $^{13}\text{C}$  NMR (101 MHz,  $\text{CDCl}_3$ )  $\delta$  192.2, 164.3, 151.7, 146.8, 140.6, 137.6, 134.0, 133.8, 133.6, 132.6, 130.9, 130.7, 128.9, 128.3, 127.0, 126.6, 123.1, 116.2, 112.4, 56.2; HRMS (ESI)  $m/z$  Calcd. for  $\text{C}_{23}\text{H}_{18}\text{NaO}_4^+$  ( $[\text{M}+\text{Na}]^+$ ) 381.1097, Found 381.1091.

### 3-Fluoro-2'-formyl-[1,1'-biphenyl]-2-yl cinnamate (3m)

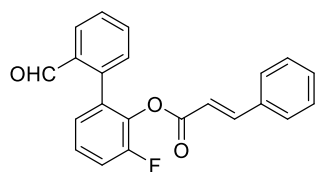

3m

White solid; mp 88.2 – 89.1 °C;  $^1\text{H}$  NMR (400 MHz,  $\text{CDCl}_3$ )  $\delta$  9.96 (s, 1H), 8.01 (dd,  $J = 7.8, 0.9$  Hz, 1H), 7.65 (d,  $J = 16.1$  Hz, 1H), 7.60 (dd,  $J = 7.5, 1.4$  Hz, 1H), 7.51 – 7.45 (m, 3H), 7.40 – 7.27 (m, 6H), 7.20 – 7.15 (m, 1H), 6.35 (d,  $J = 16.0$  Hz, 1H);  $^{13}\text{C}$  NMR (101 MHz,  $\text{CDCl}_3$ )  $\delta$  191.7, 163.7, 154.7 (d,  $J = 251.5$  Hz), 147.7, 139.4 (d,  $J = 3.0$  Hz), 136.4 (d,  $J = 13.1$  Hz), 133.8, 133.8, 133.7, 131.0, 131.0, 129.0, 128.8, 128.4, 127.4, 126.9, 126.8, 126.7 (d,  $J = 3.0$  Hz), 116.9 (d,  $J = 19.2$  Hz), 115.4;  $^{19}\text{F}$  NMR (377 MHz,  $\text{CDCl}_3$ )  $\delta$  -127.14; HRMS (ESI)  $m/z$  Calcd. for  $\text{C}_{22}\text{H}_{15}\text{FNaO}_3^+$  ( $[\text{M}+\text{Na}]^+$ ) 369.0897, Found 369.0890.

### 2'-Formyl-4-methoxy-[1,1'-biphenyl]-2-yl cinnamate (3n)

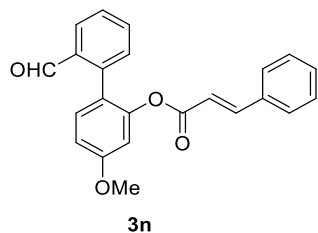

White solid; mp 110.1 – 110.9 °C; <sup>1</sup>H NMR (400 MHz, CDCl<sub>3</sub>) δ 9.98 (s, 1H), 7.99 (d, *J* = 7.7 Hz, 1H), 7.64 – 7.54 (m, 2H), 7.53 – 7.44 (m, 3H), 7.42 – 7.36 (m, 4H), 7.33 (d, *J* = 8.5 Hz, 1H), 6.97 (dd, *J* = 8.5, 2.4 Hz, 1H), 6.87 (d, *J* = 2.3 Hz, 1H), 6.31 (d, *J* = 16.0 Hz, 1H), 3.90 (s, 3H); <sup>13</sup>C NMR (101 MHz, CDCl<sub>3</sub>) δ 192.5, 164.6, 160.8, 149.2, 146.9, 140.7, 134.0, 133.9, 133.7, 132.1, 131.4, 130.8, 129.0, 128.4, 128.0, 127.0, 123.4, 116.2, 112.4, 108.3, 55.7; HRMS (ESI) *m/z* Calcd. for C<sub>23</sub>H<sub>18</sub>NaO<sub>4</sub><sup>+</sup> ([M+Na]<sup>+</sup>) 381.1097, Found 381.1091.

### 2'-Formyl-5-methyl-[1,1'-biphenyl]-2-yl cinnamate (3o)

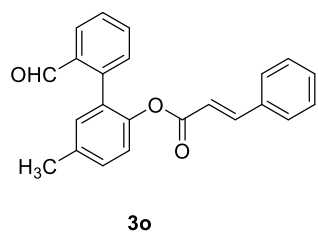

White solid; mp 116.6 – 167.8 °C; <sup>1</sup>H NMR (400 MHz, CDCl<sub>3</sub>) δ 9.97 (s, 1H), 8.00 (d, *J* = 7.3 Hz, 1H), 7.63 – 7.58 (m, 1H), 7.56 (d, *J* = 12.7 Hz, 1H), 7.49 – 7.35 (m, 7H), 7.31 (dd, *J* = 8.2, 1.6 Hz, 1H), 7.21 (d, *J* = 1.5 Hz, 1H), 7.18 (d, *J* = 8.2 Hz, 1H), 6.29 (d, *J* = 16.0 Hz, 1H), 2.43 (s, 3H); <sup>13</sup>C NMR (101 MHz, CDCl<sub>3</sub>) δ 192.3, 164.9, 146.7, 146.2, 140.9, 136.0, 134.0, 133.8, 133.6, 132.1, 131.1, 130.9, 130.7, 130.4, 128.9, 128.3, 128.2, 127.0, 122.4, 116.4, 20.9; HRMS (ESI) *m/z* Calcd. for C<sub>23</sub>H<sub>18</sub>NaO<sub>3</sub><sup>+</sup> ([M+Na]<sup>+</sup>) 365.1148, Found 365.1144.

### 5-Fluoro-2'-formyl-[1,1'-biphenyl]-2-yl cinnamate (3p)

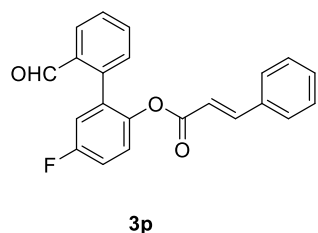

White solid; mp 130.2 – 130.9 °C; <sup>1</sup>H NMR (400 MHz, CDCl<sub>3</sub>) δ 9.98 (s, 1H), 8.02 (d, *J* = 7.8 Hz, 1H), 7.67 – 7.62 (m, 1H), 7.58 (d, *J* = 16.0 Hz, 1H), 7.52 – 7.46 (m, 3H), 7.43 – 7.37 (m, 4H), 7.30 – 7.27 (m, 1H), 7.25 – 7.20 (m, 1H), 7.16 (dd, *J* = 8.4, 2.7 Hz, 1H), 6.29 (d, *J* = 16.0 Hz, 1H); <sup>13</sup>C NMR (101 MHz, CDCl<sub>3</sub>) δ 191.7, 164.6, 160.2 (d, *J* = 247.4 Hz), 147.1, 144.3 (d, *J* = 3.0 Hz), 139.4, 133.8, 133.7, 133.1, 133.0, 130.9, 130.9, 129.0, 128.8, 128.4, 127.4, 124.2 (d, *J* = 8.1 Hz), 118.1 (d, *J* = 24.2 Hz), 116.5 (d, *J* = 23.2 Hz), 116.0; <sup>19</sup>F NMR (377 MHz, CDCl<sub>3</sub>) δ -115.85; HRMS (ESI) *m/z* Calcd. for C<sub>22</sub>H<sub>15</sub>FNaO<sub>3</sub><sup>+</sup> ([M+Na]<sup>+</sup>) 369.0897, Found 369.0890.



### 1-(2-Formylphenyl)naphthalen-2-yl cinnamate (3q)

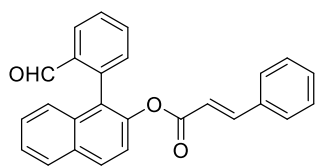

3q

White solid; mp 150.6 – 151.8 °C; <sup>1</sup>H NMR (400 MHz, CDCl<sub>3</sub>) δ 9.71 (s, 1H), 8.13 (d, *J* = 7.8 Hz, 1H), 8.02 (d, *J* = 8.9 Hz, 1H), 7.96 (d, *J* = 8.2 Hz, 1H), 7.72 – 7.66 (m, 1H), 7.61 – 7.50 (m, 3H), 7.49 – 7.40 (m, 6H), 7.40 – 7.36 (m, 3H), 6.33 (d, *J* = 16.0 Hz, 1H); <sup>13</sup>C NMR (101 MHz, CDCl<sub>3</sub>) δ 192.0, 165.1, 146.8, 146.4, 138.8, 134.9, 133.9, 133.9, 133.7, 131.9, 131.7, 130.8, 130.2, 129.0, 128.7, 128.4, 127.3, 127.2, 126.6, 126.0, 125.7, 121.5, 116.3; HRMS (ESI) *m/z* Calcd. for C<sub>26</sub>H<sub>18</sub>NaO<sub>3</sub><sup>+</sup> ([M+Na]<sup>+</sup>) 401.1148, Found 401.1142.

### 5'-Fluoro-2'-formyl-[1,1'-biphenyl]-2-yl cinnamate (3r)

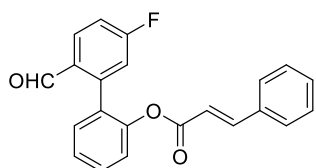

3r

White solid; mp 102.3 – 102.9 °C; <sup>1</sup>H NMR (400 MHz, CDCl<sub>3</sub>) δ 9.85 (s, 1H), 8.03 (dd, *J* = 8.6, 5.9 Hz, 1H), 7.60 (d, *J* = 16.0 Hz, 1H), 7.56 – 7.51 (m, 1H), 7.50 – 7.45 (m, 2H), 7.44 – 7.35 (m, 5H), 7.30 (d, *J* = 8.1 Hz, 1H), 7.17 – 7.08 (m, 2H), 6.32 (d, *J* = 16.0 Hz, 1H); <sup>13</sup>C NMR (101 MHz, CDCl<sub>3</sub>) δ 190.6, 165.5 (d, *J* = 257.6 Hz), 164.6, 148.3, 147.1, 143.5 (d, *J* = 10.1 Hz), 133.8, 131.4, 130.9, 130.4 (d, *J* = 3.0 Hz), 130.3, 130.1, 130.0 (d, *J* = 10.1 Hz), 129.0, 128.4, 126.5, 122.9, 118.0 (d, *J* = 22.2 Hz), 116.1, 115.8 (d, *J* = 21.2 Hz); <sup>19</sup>F NMR (377 MHz, CDCl<sub>3</sub>) δ -103.37; HRMS (ESI) *m/z* Calcd. for C<sub>22</sub>H<sub>15</sub>FNao<sub>3</sub><sup>+</sup> ([M+Na]<sup>+</sup>) 369.0897, Found 369.0890.

### 4'-Fluoro-2'-formyl-[1,1'-biphenyl]-2-yl cinnamate (3s)

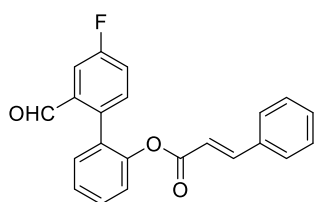

3s

White solid; mp 107.8.1 – 108.8 °C; <sup>1</sup>H NMR (400 MHz, CDCl<sub>3</sub>) δ 9.87 (d, *J* = 3.2 Hz, 1H), 7.66 (dd, *J* = 8.8, 2.8 Hz, 1H), 7.60 (d, *J* = 16.0 Hz, 1H), 7.55 – 7.45 (m, 3H), 7.44 – 7.35 (m, 6H), 7.34 – 7.27 (m, 2H), 6.31 (d, *J* = 16.0 Hz, 1H); <sup>13</sup>C NMR (101 MHz, CDCl<sub>3</sub>) δ 191.0, 164.6, 162.5 (d, *J* = 251.5 Hz), 148.5, 147.1, 136.7 (d, *J* = 3.0 Hz), 135.5 (d, *J* = 6.1 Hz), 133.8, 133.1 (d, *J* = 8.1 Hz), 131.7, 130.9, 130.4, 130.1, 129.0, 128.4, 126.4, 122.9, 120.9 (d, *J* = 22.2 Hz), 116.1, 113.3 (d, *J* = 23.2 Hz); <sup>19</sup>F NMR (377 MHz, CDCl<sub>3</sub>) δ -112.13; HRMS (ESI) *m/z* Calcd. for C<sub>22</sub>H<sub>15</sub>FNao<sub>3</sub><sup>+</sup> ([M+Na]<sup>+</sup>) 369.0897, Found 369.0890.

### 2'-(((tert-Butoxycarbonyl)amino)methyl)-[1,1'-biphenyl]-2-yl cinnamate (11)

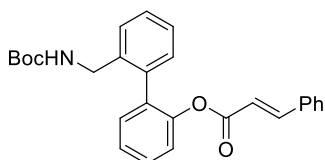

11

Colorless oil; <sup>1</sup>H NMR (600 MHz, CDCl<sub>3</sub>) δ 7.56 (d, *J* = 16.0 Hz, 1H), 7.49 – 7.41 (m, 4H), 7.40 – 7.34 (m, 3H), 7.34 – 7.28 (m, 3H), 7.25 – 7.22 (m, 2H), 7.19 (dd, *J* = 7.5,

1.1 Hz, 1H), 6.32 (d,  $J = 16.0$  Hz, 1H), 4.90 (s, 1H), 4.28 – 4.15 (m, 2H), 1.43 (s, 9H);  $^{13}\text{C}$  NMR (151 MHz,  $\text{CDCl}_3$ )  $\delta$  165.0, 156.0, 148.2, 146.5, 137.2, 136.2, 134.1, 133.9, 131.1, 130.6, 130.2, 129.0, 128.9, 128.3, 128.2, 128.1, 126.9, 126.1, 122.7, 116.6, 79.2, 42.3, 28.5; HRMS (ESI)  $m/z$  Calcd. for  $\text{C}_{27}\text{H}_{26}\text{NO}_4^-$  ( $[\text{M}-\text{H}]^-$ ) 428.18673, Found 428.18711.

### 3. General procedure for preparation of N-aryl-2-formylpyrroles **5**

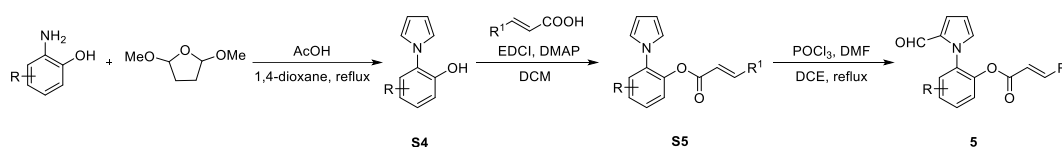

*o*-Aminophenols (1 equiv) was dissolved in 1,4-dioxane (0.25 M). To this solution was added 2,5-dimethoxytetrahydrofuran (1 equiv) and AcOH (0.5 M) sequentially. The mixture was heated to reflux (115 °C) in an oil bath and stirred for 5 h. After cooled to room temperature, most of the solvent was removed under reduced pressure. The residue was purified directly by flash silica gel chromatography with petroleum ether/EtOAc (50/1) to afford compound **S4**.<sup>[3]</sup>

To a round-bottom flask with a magnetic stirring bar, carboxylic acid (1.1 equiv), phenol **S4** (1 equiv), DMAP (5 mol%) and EDC·HCl (1.1 equiv) were added, and the resulting mixture was stirred in DCM (0.2 M) overnight at room temperature. After the reaction reached completion,  $\text{H}_2\text{O}$  was added. The organic layer was then separated, and the aqueous layer was extracted with EtOAc three times. The organic layer was successively washed with brine. After drying over  $\text{Na}_2\text{SO}_4$ , the resulting solution was concentrated under reduced pressure. The crude mixture was purified by flash chromatography on silica gel with eluent of petroleum ether /ethyl acetate (100:1) affording the corresponding pure compound **S5**.

DMF (1.2 equiv) was placed in 100 mL round-bottom flask and cooled with ice bath below 0 °C.  $\text{POCl}_3$  (1.2 equiv) was added dropwise and let to stir for 30 min. The solution of **S5** (1.0 equiv.) in DCE (0.5 M) was added. Cooling bath was removed and the reaction mixture was stirred at 80 °C for 3 h. After cooling to r.t., the mixture was washed with concentrated aqueous  $\text{Na}_2\text{CO}_3$  solution and distilled water. The organic phase was dried over anhydrous  $\text{Na}_2\text{SO}_4$ , filtered and concentrated. The crude mixture was purified by flash chromatography on silica gel with eluent of petroleum ether /ethyl acetate (20:1) affording the corresponding pure compound **5**.<sup>[4]</sup>

### 2-(2-Formyl-1H-pyrrol-1-yl)phenyl cinnamate (5a)

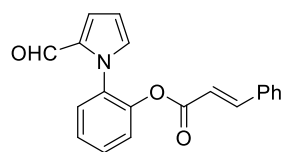

5a

White solid. mp 85.1 – 85.9 °C; <sup>1</sup>H NMR (400 MHz, CDCl<sub>3</sub>) δ 9.55 (s, 1H), 7.65 (d, *J* = 16.0 Hz, 1H), 7.57 – 7.50 (m, 3H), 7.46 – 7.36 (m, 6H), 7.11 (dd, *J* = 4.0, 1.6 Hz, 1H), 7.03 – 6.99 (m, 1H), 6.42 – 6.36 (m, 2H); <sup>13</sup>C NMR (151 MHz, CDCl<sub>3</sub>) δ 178.9, 164.3, 147.2, 146.3, 133.9, 132.9, 132.0, 131.3, 130.9, 129.8, 129.0, 128.4, 128.3, 126.6, 123.5, 116.0, 111.0; HRMS (ESI) *m/z* Calcd. for C<sub>20</sub>H<sub>15</sub>NNaO<sub>3</sub><sup>+</sup> ([M+Na]<sup>+</sup>) 340.0944, Found 340.0949.

### 2-(2-Formyl-1H-pyrrol-1-yl)phenyl (E)-3-(2-methoxyphenyl)acrylate (5b)

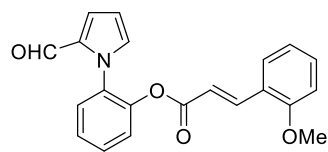

5b

White solid. mp 89.9 – 90.9 °C; <sup>1</sup>H NMR (400 MHz, CDCl<sub>3</sub>) δ 9.51 (s, 1H), 7.93 (d, *J* = 16.1 Hz, 1H), 7.53 – 7.48 (m, 1H), 7.45 (dd, *J* = 7.7, 1.4 Hz, 1H), 7.41 – 7.33 (m, 4H), 7.08 (dd, *J* = 4.0, 1.6 Hz, 1H), 7.00 – 6.89 (m, 3H), 6.47 (d, *J* = 16.1 Hz, 1H), 6.36 (dd, *J* = 3.9, 2.7 Hz, 1H), 3.88 (s, 3H); <sup>13</sup>C NMR (151 MHz, CDCl<sub>3</sub>) δ 178.9, 165.0, 158.7, 146.4, 142.8, 133.0, 132.1, 132.0, 131.3, 129.8, 129.4, 128.3, 126.4, 123.6, 122.9, 120.7, 116.4, 111.2, 110.9, 55.5; HRMS (ESI) *m/z* Calcd. for C<sub>21</sub>H<sub>17</sub>NNaO<sub>4</sub><sup>+</sup> ([M+Na]<sup>+</sup>) 370.1050, Found 370.1055.

### 2-(2-Formyl-1H-pyrrol-1-yl)phenyl (E)-3-(2-chlorophenyl)acrylate (5c)

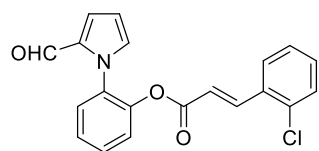

5c

White solid. mp 98.3 – 98.8 °C; <sup>1</sup>H NMR (600 MHz, CDCl<sub>3</sub>) δ 9.53 (s, 1H), 8.03 (d, *J* = 16.0 Hz, 1H), 7.58 (dd, *J* = 7.7, 1.2 Hz, 1H), 7.54 – 7.49 (m, 1H), 7.43 – 7.36 (m, 4H), 7.35 – 7.31 (m, 1H), 7.30 – 7.26 (m, 1H), 7.09 (dd, *J* = 3.9, 1.5 Hz, 1H), 7.00 – 6.98 (m, 1H), 6.39 – 6.33 (m, 2H); <sup>13</sup>C NMR (101 MHz, CDCl<sub>3</sub>) δ 178.8, 163.9, 146.2, 142.8, 135.3, 132.9, 132.2, 132.0, 131.6, 131.4, 130.3, 129.8, 128.3, 127.8, 127.2, 126.6, 123.4, 118.6, 111.0; HRMS (ESI) *m/z* Calcd. for C<sub>20</sub>H<sub>14</sub>ClNNaO<sub>3</sub><sup>+</sup> ([M+Na]<sup>+</sup>) 374.0554, Found 374.0558.

### 2-(2-Formyl-1H-pyrrol-1-yl)phenyl (E)-3-(m-tolyl)acrylate (5d)

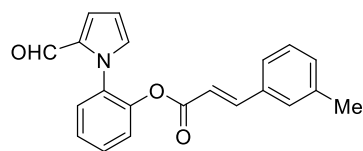

5d

White solid. mp 85.4 – 86.3 °C; <sup>1</sup>H NMR (600 MHz, CDCl<sub>3</sub>) δ 9.51 (s, 1H), 7.60 (d, *J* = 16.0 Hz, 1H), 7.54 – 7.49 (m, 1H), 7.43 – 7.33 (m, 3H), 7.32 – 7.27 (m, 3H), 7.22 (d, *J* = 6.9 Hz, 1H), 7.09 – 7.07 (m, 1H), 6.99 – 6.97 (m, 1H), 6.37 – 6.33 (m, 2H), 2.37 (s, 3H); <sup>13</sup>C

NMR (101 MHz, CDCl<sub>3</sub>)  $\delta$  178.9, 164.4, 147.4, 146.3, 138.7, 133.9, 133.0, 132.0, 131.7, 131.3, 129.8, 129.0, 128.9, 128.3, 126.5, 125.6, 123.5, 115.7, 110.9, 21.3; HRMS (ESI)  $m/z$  Calcd. for C<sub>21</sub>H<sub>17</sub>NNaO<sub>3</sub><sup>+</sup> ([M+Na]<sup>+</sup>) 354.1101, Found 354.1102.

### 2-(2-Formyl-1H-pyrrol-1-yl)phenyl (E)-3-(3-bromophenyl)acrylate (5e)

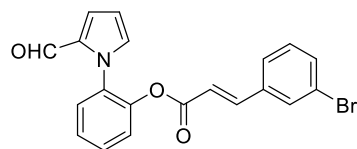

5e

White solid. mp 102.4 – 103.2 °C; <sup>1</sup>H NMR (600 MHz, CDCl<sub>3</sub>)  $\delta$  9.51 (s, 1H), 7.61 – 7.58 (m, 1H), 7.54 – 7.46 (m, 3H), 7.42 – 7.32 (m, 4H), 7.25 – 7.20 (m, 1H), 7.08 (d,  $J$  = 2.5 Hz, 1H), 7.00 – 6.95 (m, 1H), 6.38 – 6.29 (m, 2H); <sup>13</sup>C NMR (101 MHz, CDCl<sub>3</sub>)  $\delta$  178.8, 163.9, 146.1,

145.4, 135.9, 133.6, 132.9, 131.9, 131.3, 131.0, 130.5, 129.9, 128.3, 127.0, 126.7, 123.4, 123.1, 117.5, 111.0; HRMS (ESI)  $m/z$  Calcd. for C<sub>20</sub>H<sub>14</sub>BrNNaO<sub>3</sub><sup>+</sup> ([M+Na]<sup>+</sup>) 418.0049, Found 418.0045.

### 2-(2-Formyl-1H-pyrrol-1-yl)phenyl (E)-3-(3-chlorophenyl)acrylate (5f)

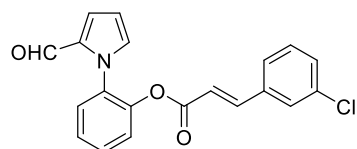

5f

White solid. mp 94.2 – 94.9 °C; <sup>1</sup>H NMR (400 MHz, CDCl<sub>3</sub>)  $\delta$  9.51 (s, 1H), 7.58 – 7.49 (m, 2H), 7.48 – 7.45 (m, 1H), 7.44 – 7.38 (m, 2H), 7.37 – 7.29 (m, 4H), 7.09 (dd,  $J$  = 3.9, 1.3 Hz, 1H), 6.99 – 6.97 (m, 1H), 6.40 – 6.32 (m, 2H); <sup>13</sup>C NMR (101 MHz, CDCl<sub>3</sub>)  $\delta$  178.8,

163.9, 146.2, 145.5, 135.7, 135.1, 132.9, 131.9, 131.3, 130.7, 130.2, 129.9, 128.3, 128.1, 126.7, 126.5, 123.4, 117.5, 111.0; HRMS (ESI)  $m/z$  Calcd. for C<sub>20</sub>H<sub>14</sub>ClNNaO<sub>3</sub><sup>+</sup> ([M+Na]<sup>+</sup>) 374.0554, Found 374.0557.

### 2-(2-Formyl-1H-pyrrol-1-yl)phenyl (E)-3-(p-tolyl)acrylate (5g)

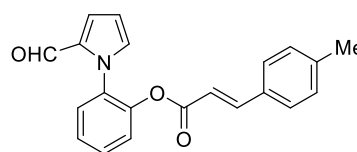

5g

White solid. mp 93.7 – 94.2 °C; <sup>1</sup>H NMR (600 MHz, CDCl<sub>3</sub>)  $\delta$  9.50 (s, 1H), 7.59 (d,  $J$  = 16.0 Hz, 1H), 7.51 – 7.46 (m, 1H), 7.40 – 7.32 (m, 5H), 7.17 (d,  $J$  = 7.9 Hz, 2H), 7.07 (dd,  $J$  = 3.9, 1.5 Hz, 1H), 6.98 – 6.96 (m, 1H), 6.34 (dd,  $J$  = 3.8, 2.7 Hz, 1H), 6.30 (d,  $J$  = 16.0 Hz, 1H),

2.35 (s, 3H); <sup>13</sup>C NMR (151 MHz, CDCl<sub>3</sub>)  $\delta$  178.9, 164.5, 147.3, 146.3, 141.5, 133.0, 132.0, 131.3, 131.2, 129.8, 129.7, 128.4, 128.3, 126.5, 123.5, 114.8, 111.0, 21.6; HRMS (ESI)  $m/z$  Calcd. for C<sub>21</sub>H<sub>17</sub>NNaO<sub>3</sub><sup>+</sup> ([M+Na]<sup>+</sup>) 354.1101, Found 354.1104.

### 2-(2-Formyl-1H-pyrrol-1-yl)phenyl (E)-3-(4-methoxyphenyl)acrylate (5h)

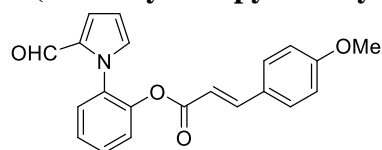

5h

White solid. mp 107.2 – 107.8 °C; <sup>1</sup>H NMR (400 MHz, CDCl<sub>3</sub>)  $\delta$  9.51 (s, 1H), 7.58 (d,  $J$  = 15.9 Hz, 1H), 7.53 – 7.48 (m, 1H), 7.46 – 7.32 (m, 5H), 7.08 (dd,  $J$  = 3.9,

1.5 Hz, 1H), 7.01 – 6.96 (m, 1H), 6.90 (d,  $J = 8.7$  Hz, 2H), 6.36 (dd,  $J = 3.8, 2.7$  Hz, 1H), 6.22 (d,  $J = 15.9$  Hz, 1H), 3.83 (s, 3H);  $^{13}\text{C}$  NMR (101 MHz,  $\text{CDCl}_3$ )  $\delta$  178.9, 164.7, 161.9, 147.0, 146.4, 132.9, 132.0, 131.3, 130.2, 129.8, 128.3, 126.6, 126.5, 123.6, 114.4, 113.3, 110.9, 55.4; HRMS (ESI)  $m/z$  Calcd. for  $\text{C}_{21}\text{H}_{17}\text{NNaO}_4^+$  ( $[\text{M}+\text{Na}]^+$ ) 370.1050, Found 370.1054.

**2-(2-Formyl-1H-pyrrol-1-yl)phenyl (E)-3-(4-fluorophenyl)acrylate (5i)**

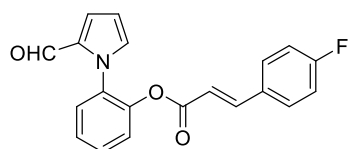

5i

White solid. mp 94.2 – 94.9 °C;  $^1\text{H}$  NMR (400 MHz,  $\text{CDCl}_3$ )  $\delta$  9.51 (s, 1H), 7.58 (d,  $J = 16.0$  Hz, 1H), 7.54 – 7.45 (m, 3H), 7.44 – 7.37 (m, 2H), 7.37 – 7.32 (m, 1H), 7.12 – 7.04 (m, 3H), 7.01 – 6.96 (m, 1H), 6.37 (dd,  $J = 3.9, 2.7$  Hz, 1H), 6.28 (d,  $J = 16.0$  Hz, 1H);  $^{13}\text{C}$  NMR (151 MHz,  $\text{CDCl}_3$ )  $\delta$  178.9, 164.3 (d,  $J = 252.2$  Hz), 164.2, 146.2, 145.9, 132.9, 132.0, 131.3, 130.4 (d,  $J = 9.1$  Hz), 130.2 (d,  $J = 3.1$  Hz), 129.9, 128.3, 126.6, 123.4, 116.2 (d,  $J = 22.7$  Hz), 115.7, 111.0;  $^{19}\text{F}$  NMR (377 MHz,  $\text{CDCl}_3$ )  $\delta$  -108.39; HRMS (ESI)  $m/z$  Calcd. for  $\text{C}_{20}\text{H}_{14}\text{FNNaO}_3^+$  ( $[\text{M}+\text{Na}]^+$ ) 358.0850, Found 358.0855.

**2-(2-Formyl-1H-pyrrol-1-yl)phenyl (E)-3-(4-chlorophenyl)acrylate (5j)**

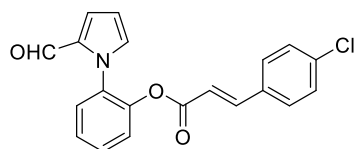

5j

White solid. mp 97.8 – 98.7 °C;  $^1\text{H}$  NMR (400 MHz,  $\text{CDCl}_3$ )  $\delta$  9.51 (s, 1H), 7.56 (d,  $J = 16.0$  Hz, 1H), 7.54 – 7.48 (m, 1H), 7.44 – 7.38 (m, 4H), 7.37 – 7.32 (m, 3H), 7.08 (dd,  $J = 4.0, 1.6$  Hz, 1H), 6.99 – 6.97 (m, 1H), 6.37 (dd,  $J = 4.0, 2.6$  Hz, 1H), 6.32 (d,  $J = 16.0$  Hz, 1H);  $^{13}\text{C}$  NMR (101 MHz,  $\text{CDCl}_3$ )  $\delta$  178.8, 164.1, 146.2, 145.7, 136.9, 132.9, 132.4, 131.9, 131.3, 129.9, 129.5, 129.3, 128.3, 126.6, 123.4, 116.5, 111.0; HRMS (ESI)  $m/z$  Calcd. for  $\text{C}_{20}\text{H}_{14}\text{ClNNaO}_3^+$  ( $[\text{M}+\text{Na}]^+$ ) 374.0554, Found 374.0558.

**2-(2-Formyl-1H-pyrrol-1-yl)phenyl (E)-3-(4-bromophenyl)acrylate (5k)**

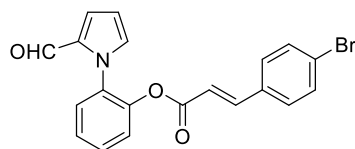

5k

White solid. mp 109.8 – 110.3 °C;  $^1\text{H}$  NMR (400 MHz,  $\text{CDCl}_3$ )  $\delta$  9.51 (s, 1H), 7.58 – 7.48 (m, 4H), 7.44 – 7.37 (m, 2H), 7.37 – 7.32 (m, 3H), 7.08 (dd,  $J = 4.0, 1.5$  Hz, 1H), 7.00 – 6.96 (m, 1H), 6.39 – 6.31 (m, 2H);  $^{13}\text{C}$  NMR (151 MHz,  $\text{CDCl}_3$ )  $\delta$  178.8, 164.1, 146.2, 145.8, 132.9, 132.8, 132.3, 131.9, 131.3, 129.9, 129.7, 128.3, 126.7, 125.3, 123.4, 116.6, 111.0; HRMS (ESI)  $m/z$  Calcd. for  $\text{C}_{20}\text{H}_{14}\text{BrNNaO}_3^+$  ( $[\text{M}+\text{Na}]^+$ ) 418.0049, Found 418.0049.

### 2-(2-Formyl-1H-pyrrol-1-yl)phenyl (E)-3-(naphthalen-1-yl)acrylate (5l)

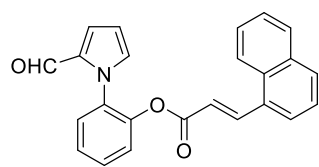

5l

Yellow solid. mp 136.3 – 136.8 °C; <sup>1</sup>H NMR (400 MHz, CDCl<sub>3</sub>) δ 9.55 (s, 1H), 8.46 (d, *J* = 15.8 Hz, 1H), 8.10 (d, *J* = 8.4 Hz, 1H), 7.89 (dd, *J* = 14.5, 8.0 Hz, 2H), 7.73 (d, *J* = 7.2 Hz, 1H), 7.62 – 7.57 (m, 1H), 7.56 – 7.51 (m, 2H), 7.50 – 7.47 (m, 1H), 7.46 – 7.37 (m, 3H), 7.10 (dd, *J* = 4.0, 1.5 Hz, 1H), 7.04 – 7.01 (m, 1H), 6.46 (d, *J* = 15.7 Hz, 1H), 6.39 (dd, *J* = 3.9, 2.7 Hz, 1H); <sup>13</sup>C NMR (151 MHz, CDCl<sub>3</sub>) δ 178.9, 164.2, 146.3, 144.1, 133.7, 133.0, 132.0, 131.4, 131.2, 131.1, 129.9, 128.8, 128.3, 127.1, 126.6, 126.4, 125.4, 125.4, 123.5, 123.3, 118.5, 111.0; HRMS (ESI) *m/z* Calcd. for C<sub>24</sub>H<sub>17</sub>NNaO<sub>3</sub><sup>+</sup> ([M+Na]<sup>+</sup>) 390.1101, Found 390.1104.

### 2-(2-Formyl-1H-pyrrol-1-yl)phenyl (E)-3-(thiophen-2-yl)acrylate (5m)

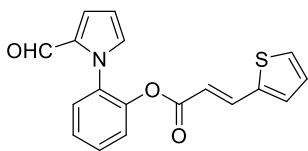

5m

White solid. mp 95.5 – 96.3 °C; <sup>1</sup>H NMR (400 MHz, CDCl<sub>3</sub>) δ 9.51 (s, 1H), 7.72 (d, *J* = 15.7 Hz, 1H), 7.53 – 7.48 (m, 1H), 7.44 – 7.35 (m, 3H), 7.33 (d, *J* = 8.1 Hz, 1H), 7.26 – 7.24 (m, 1H), 7.09 (d, *J* = 3.8 Hz, 1H), 7.07 – 7.04 (m, 1H), 6.98 (s, 1H), 6.39 – 6.34 (m, 1H), 6.14 (d, *J* = 15.6 Hz, 1H); <sup>13</sup>C NMR (101 MHz, CDCl<sub>3</sub>) δ 178.9, 164.2, 146.3, 139.5, 139.0, 132.9, 132.0, 131.9, 131.3, 129.8, 129.5, 128.3, 128.3, 126.5, 123.5, 114.5, 110.9; HRMS (ESI) *m/z* Calcd. for C<sub>18</sub>H<sub>13</sub>NNaO<sub>3</sub>S<sup>+</sup> ([M+Na]<sup>+</sup>) 346.0508, Found 346.0504.

### 2-(2-Formyl-1H-pyrrol-1-yl)phenyl (E)-but-2-enoate (5n)

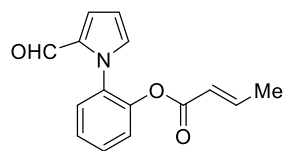

5n

White solid. mp 61.8 – 62.5 °C; <sup>1</sup>H NMR (600 MHz, CDCl<sub>3</sub>) δ 9.39 (s, 1H), 7.42 – 7.37 (m, 1H), 7.32 – 7.25 (m, 2H), 7.21 – 7.18 (m, 1H), 7.01 (dd, *J* = 4.0, 1.5 Hz, 1H), 6.91 – 6.83 (m, 2H), 6.28 (dd, *J* = 3.9, 2.7 Hz, 1H), 5.70 (dd, *J* = 15.5, 1.7 Hz, 1H), 1.78 (dd, *J* = 6.9, 1.6 Hz, 3H); <sup>13</sup>C NMR (151 MHz, CDCl<sub>3</sub>) δ 178.9, 163.7, 147.9, 146.2, 132.9, 131.9, 131.2, 129.8, 128.3, 126.5, 123.5, 120.9, 110.9, 18.2; HRMS (ESI) *m/z* Calcd. for C<sub>15</sub>H<sub>13</sub>NNaO<sub>3</sub><sup>+</sup> ([M+Na]<sup>+</sup>) 278.0788, Found 278.0792.

### 2-(2-Formyl-1H-pyrrol-1-yl)-4-methylphenyl cinnamate (5o)

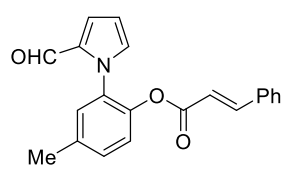

5o

White solid. mp 91.6 – 92.3 °C; <sup>1</sup>H NMR (400 MHz, CDCl<sub>3</sub>) δ 9.51 (s, 1H), 7.62 (d, *J* = 16.0 Hz, 1H), 7.51 – 7.46 (m, 2H), 7.41 – 7.35 (m, 3H), 7.30 (dd, *J* = 8.4, 1.3 Hz, 1H), 7.23 – 7.19 (m, 2H), 7.07 (dd, *J* = 4.0, 1.6 Hz, 1H), 6.99 – 6.95 (m, 1H), 6.38 – 6.31 (m, 2H), 2.42 (s, 3H); <sup>13</sup>C NMR (101 MHz, CDCl<sub>3</sub>) δ 179.0, 164.6, 147.1, 143.9, 136.7, 133.9, 132.9, 131.5, 131.3, 130.9, 130.4,

129.0, 128.7, 128.4, 123.0, 116.0, 110.9, 20.9; HRMS (ESI)  $m/z$  Calcd. for  $C_{21}H_{17}NNaO_3^+$  ( $[M+Na]^+$ ) 354.1101, Found 354.1099.

#### 4-Chloro-2-(2-formyl-1H-pyrrol-1-yl)phenyl cinnamate (5p)

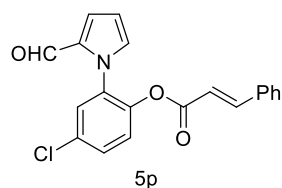

White solid. mp 93.4 – 94.0 °C;  $^1H$  NMR (600 MHz,  $CDCl_3$ )  $\delta$  9.53 (s, 1H), 7.61 (d,  $J = 16.0$  Hz, 1H), 7.49 – 7.45 (m, 3H), 7.42 – 7.37 (m, 4H), 7.29 (d,  $J = 8.7$  Hz, 1H), 7.06 (dd,  $J = 3.9, 1.5$  Hz, 1H), 6.99 – 6.95 (m, 1H), 6.37 (dd,  $J = 3.8, 2.7$  Hz, 1H), 6.33 (d,  $J = 16.0$  Hz, 1H);  $^{13}C$  NMR (101 MHz,  $CDCl_3$ )  $\delta$  178.6, 164.1, 147.6, 145.0, 133.8, 133.1, 132.8, 131.5, 131.4, 131.1, 129.8, 129.0, 128.4, 128.3, 124.4, 115.6, 111.3; HRMS (ESI)  $m/z$  Calcd. for  $C_{20}H_{14}ClNNaO_3^+$  ( $[M+Na]^+$ ) 374.0554, Found 374.0551.

#### 4-Bromo-2-(2-formyl-1H-pyrrol-1-yl)phenyl cinnamate (5q)

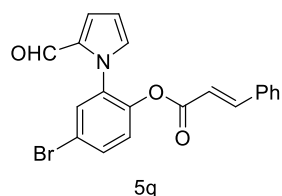

White solid. mp 128.7 – 129.2 °C;  $^1H$  NMR (400 MHz,  $CDCl_3$ )  $\delta$  9.51 (s, 1H), 7.62 – 7.57 (m, 2H), 7.55 – 7.52 (m, 1H), 7.49 – 7.44 (m, 2H), 7.41 – 7.34 (m, 3H), 7.22 (d,  $J = 8.7$  Hz, 1H), 7.07 – 7.03 (m, 1H), 6.97 – 6.93 (m, 1H), 6.38 – 6.34 (m, 1H), 6.31 (d,  $J = 16.0$  Hz, 1H);  $^{13}C$  NMR (101 MHz,  $CDCl_3$ )  $\delta$  178.5, 163.9, 147.6, 145.5, 133.8, 133.4, 132.8, 132.7, 131.4, 131.1, 131.0, 129.0, 128.4, 124.7, 118.9, 115.6, 111.3; HRMS (ESI)  $m/z$  Calcd. for  $C_{20}H_{14}BrNNaO_3^+$  ( $[M+Na]^+$ ) 418.0049, Found 418.0044.

#### 5-Chloro-2-(2-formyl-1H-pyrrol-1-yl)phenyl cinnamate (5r)

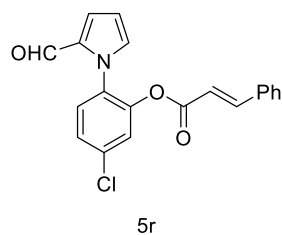

White solid. mp 93.8 – 94.5 °C;  $^1H$  NMR (600 MHz,  $CDCl_3$ )  $\delta$  9.52 (s, 1H), 7.62 (d,  $J = 16.0$  Hz, 1H), 7.50 – 7.47 (m, 2H), 7.43 – 7.37 (m, 4H), 7.37 – 7.32 (m, 2H), 7.07 (dd,  $J = 4.0, 1.6$  Hz, 1H), 6.97 – 6.94 (m, 1H), 6.37 (dd,  $J = 4.0, 2.6$  Hz, 1H), 6.33 (d,  $J = 16.0$  Hz, 1H);  $^{13}C$  NMR (151 MHz,  $CDCl_3$ )  $\delta$  178.6, 163.9, 147.7, 146.7, 135.0, 133.7, 132.8, 131.5, 131.1, 130.9, 129.0, 128.9, 128.4, 126.7, 124.0, 115.5, 111.2; HRMS (ESI)  $m/z$  Calcd. for  $C_{20}H_{14}ClNNaO_3^+$  ( $[M+Na]^+$ ) 374.0554, Found 374.0549.

#### 5-Bromo-2-(2-formyl-1H-pyrrol-1-yl)phenyl cinnamate (5s)

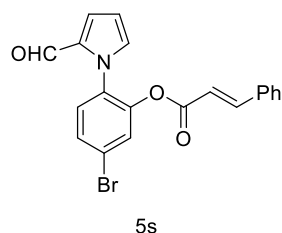

White solid. mp 125.6 – 126.3 °C;  $^1H$  NMR (400 MHz,  $CDCl_3$ )  $\delta$  9.52 (s, 1H), 7.62 (d,  $J = 16.0$  Hz, 1H), 7.55 – 7.44 (m, 4H), 7.39 (d,  $J = 6.6$  Hz, 3H), 7.27 (d,  $J = 8.4$  Hz, 1H), 7.06 (d,  $J = 2.5$  Hz, 1H), 6.97 – 6.93 (m, 1H), 6.41 – 6.29 (m, 2H);  $^{13}C$

NMR (101 MHz, CDCl<sub>3</sub>)  $\delta$  178.6, 163.9, 147.7, 146.8, 133.8, 132.8, 131.5, 131.4, 131.1, 129.7, 129.2, 129.0, 128.5, 126.8, 122.6, 115.5, 111.2; HRMS (ESI)  $m/z$  Calcd. for C<sub>20</sub>H<sub>14</sub>BrNNaO<sub>3</sub><sup>+</sup> ([M+Na]<sup>+</sup>) 418.0049, Found 418.0045.

## 4. Optimization of reaction conditions

**Table 1 Optimization of reaction conditions**

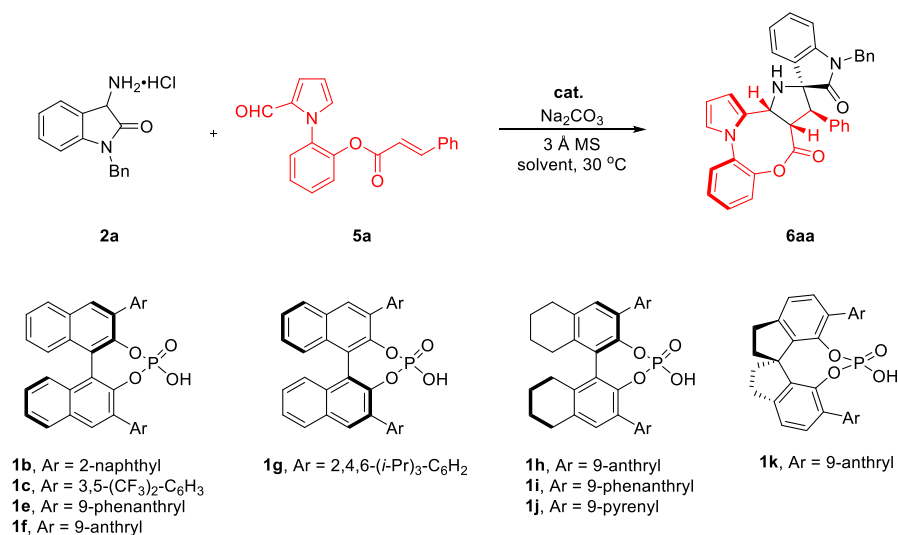

| Entry <sup>a</sup> | Cat.      | Solvent           | t [h] | Yield [%] <sup>b</sup> | dr <sup>c</sup> | ee [%] <sup>d</sup> |
|--------------------|-----------|-------------------|-------|------------------------|-----------------|---------------------|
| 1                  | DPP       | DCM               | 24    | 66                     | > 20:1          | -                   |
| 2                  | <b>1b</b> | DCM               | 48    | 56                     | > 20:1          | 33                  |
| 3                  | <b>1c</b> | DCM               | 48    | 67                     | > 20:1          | 49                  |
| 4                  | <b>1e</b> | DCM               | 48    | 70                     | > 20:1          | 61                  |
| 5                  | <b>1f</b> | DCM               | 48    | 64                     | > 20:1          | 40                  |
| 6                  | <b>1g</b> | DCM               | 48    | 77                     | > 20:1          | -60                 |
| 7                  | <b>1h</b> | DCM               | 48    | 78                     | > 20:1          | 77                  |
| 8                  | <b>1i</b> | DCM               | 48    | 45                     | > 20:1          | 73                  |
| 9                  | <b>1j</b> | DCM               | 48    | 70                     | > 20:1          | 40                  |
| 10                 | <b>1k</b> | DCM               | 48    | 76                     | > 20:1          | -31                 |
| 11                 | <b>1h</b> | DCE               | 48    | 80                     | > 20:1          | 67                  |
| 12                 | <b>1h</b> | toluene           | 60    | 88                     | > 20:1          | 87                  |
| 13                 | <b>1h</b> | THF               | 48    | Trace                  | -               | -                   |
| 14                 | <b>1h</b> | Et <sub>2</sub> O | 72    | 50                     | > 20:1          | 87                  |
| 15                 | <b>1h</b> | xylene            | 72    | 81                     | > 20:1          | 85                  |
| 16                 | <b>1h</b> | mesitylene        | 72    | 74                     | > 20:1          | 80                  |
| 17                 | <b>1h</b> | bromobenzene      | 72    | 80                     | > 20:1          | 81                  |



|                       |           |                |           |           |                  |           |
|-----------------------|-----------|----------------|-----------|-----------|------------------|-----------|
| 18                    | <b>1h</b> | Tol.:DCM=1:1   | 60        | 76        | > 20:1           | 87        |
| 19 <sup>e</sup>       | <b>1h</b> | toluene        | 48        | 81        | > 20:1           | 90        |
| <b>20<sup>f</sup></b> | <b>1h</b> | <b>toluene</b> | <b>60</b> | <b>84</b> | <b>&gt; 20:1</b> | <b>93</b> |
| 21 <sup>f, g</sup>    | <b>1h</b> | toluene        | 96        | 80        | > 20:1           | 88        |

<sup>a</sup>The reaction was carried out on a 0.1 mmol scale with Na<sub>2</sub>CO<sub>3</sub> (1.5 equiv), 3 Å MS (100 mg), **cat.** (10 mol%) in 1.0 mL solvent at 30 °C under nitrogen, and the ratio of **2a/5a** was 1.5/1. <sup>b</sup>Isolated yield. <sup>c</sup>The dr was determined by <sup>1</sup>H NMR of the crude reaction mixture. <sup>d</sup>The ee was determined by chiral HPLC. <sup>e</sup>In 0.5 mL toluene. <sup>f</sup>In 2.0 mL toluene. <sup>g</sup>Without base.

## 5. General procedure for the synthesis of products 4/6

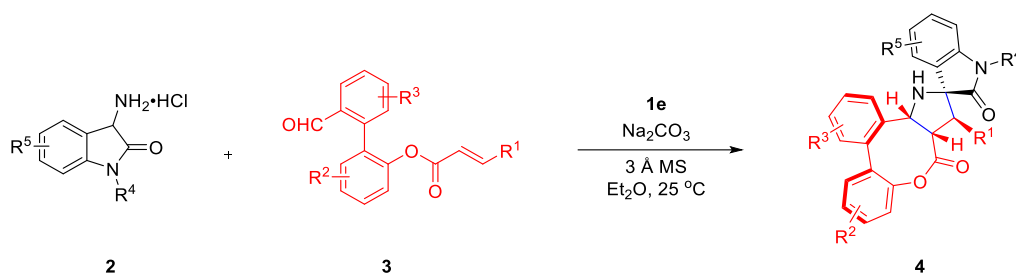

In a Schlenk tube, 3-amino oxindole hydrochlorides **2** (0.24 mmol), Na<sub>2</sub>CO<sub>3</sub> (0.3 mmol), 3 Å MS (200 mg), biaryl aldehydes **3** (0.2 mmol) and catalyst **1e** (0.02 mmol) were added into Et<sub>2</sub>O (2 mL) under nitrogen atmosphere. The reaction solution was stirred at room temperature. After the reaction was complete (monitored by TLC), the crude product was purified by column chromatography (ethyl acetate/petroleum ether = 1/10 to 1/5) on silica gel to give the product **4**.

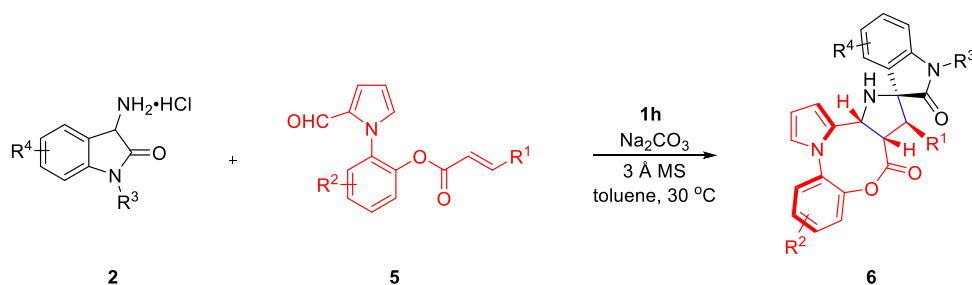

In a Schlenk tube, 3-amino oxindole hydrochlorides **2** (0.24 mmol), Na<sub>2</sub>CO<sub>3</sub> (0.3 mmol), 3 Å MS (200 mg), N-aryl-2-formylpyrroles **5** (0.2 mmol) and catalyst **1h** (0.02 mmol) were added into toluene (4 mL) under nitrogen atmosphere. The reaction solution was stirred at 30 °C. After the reaction was complete (monitored by TLC), the crude product was purified by column chromatography (ethyl acetate/petroleum ether = 1/10 to 1/5) on silica gel to give the product **6**.

## Gram-scale reaction

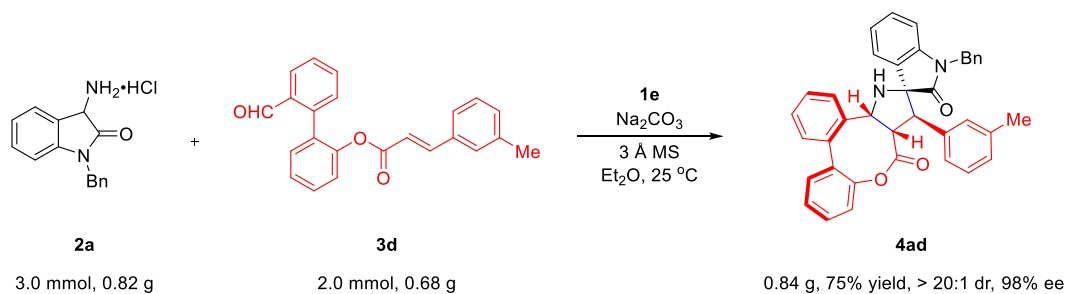

In a Schlenk tube, 3-amino oxindole hydrochloride **2a** (2.4 mmol),  $\text{Na}_2\text{CO}_3$  (3.0 mmol), 3 Å MS (2000 mg), biaryl aldehyde **3d** (2.0 mmol) and catalyst **1e** (0.2 mmol) were added into  $\text{Et}_2\text{O}$  (20 mL) under nitrogen atmosphere. The reaction solution was stirred at room temperature. After the reaction was complete (monitored by TLC), the crude product was purified by column chromatography (ethyl acetate/petroleum ether = 1/10 to 1/5) on silica gel to give the product **4ad** with 75% yield, > 20:1 dr and 98% ee.

## The scale-up reaction

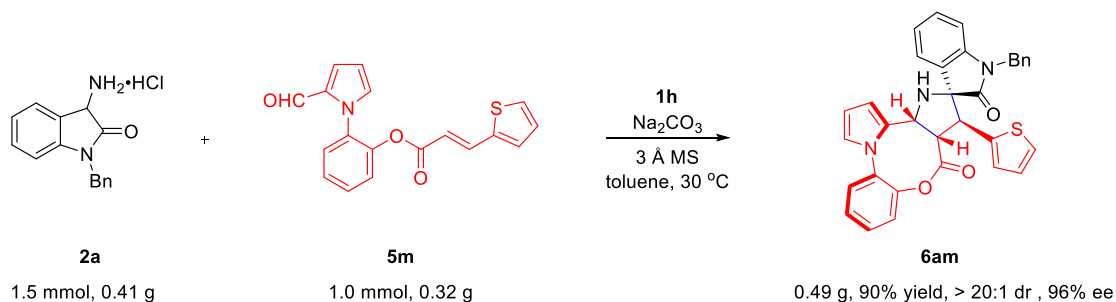

In a Schlenk tube, 3-amino oxindole hydrochloride **2a** (1.5 mmol),  $\text{Na}_2\text{CO}_3$  (1.5 mmol), 3 Å MS (1000 mg), N-aryl-2-formylpyrrole **5m** (1.0 mmol) and catalyst **1h** (0.1 mmol) were added into toluene (20 mL) under nitrogen atmosphere. The reaction solution was stirred at 30 °C. After the reaction was complete (monitored by TLC), the crude product was purified by column chromatography (ethyl acetate/petroleum ether = 1/10 to 1/5) on silica gel to give the product **6am** with 90% yield, > 20:1 dr and 96% ee.

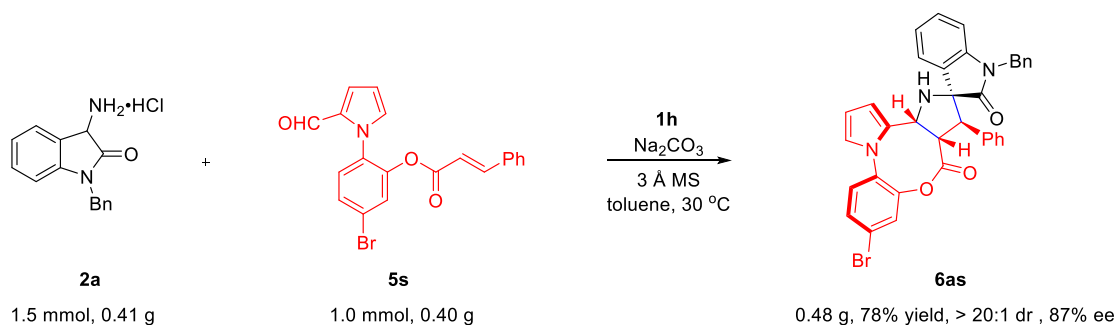

In a Schlenk tube, 3-amino oxindole hydrochloride **2a** (1.5 mmol), Na<sub>2</sub>CO<sub>3</sub> (1.5 mmol), 3 Å MS (1000 mg), N-aryl-2-formylpyrrole **5s** (1.0 mmol) and catalyst **1h** (0.1 mmol) were added into toluene (20 mL) under nitrogen atmosphere. The reaction solution was stirred at 30 °C. After the reaction was complete (monitored by TLC), the crude product was purified by column chromatography (ethyl acetate/petroleum ether = 1/10 to 1/5) on silica gel to give the product **6as** with 78% yield, > 20:1 dr and 87% ee.

## Synthetic transformations

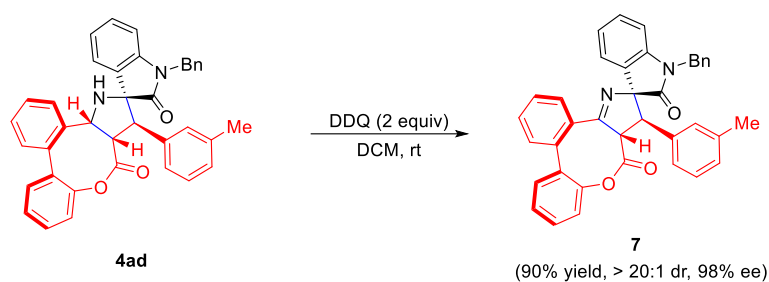

A reaction tube was charged with **4ad** (1.0 equiv, 0.2 mmol) and DCM (2 mL), and then DDQ (2.0 equiv, 0.4 mmol) was added. The reaction was stirred at room temperature until it was complete (monitored by TLC). Then the crude product was purified by column chromatography (ethyl acetate/petroleum ether = 1/10) on silica gel to give the product **7** as a white solid.

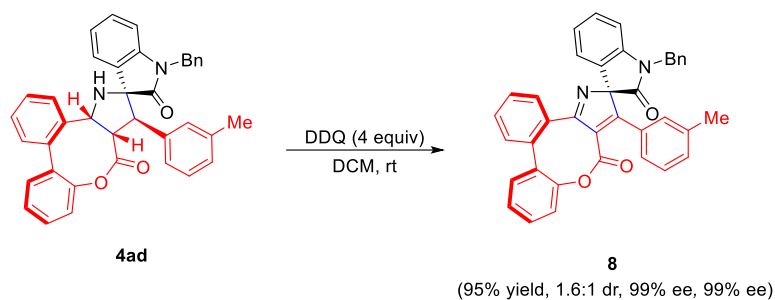

A reaction tube was charged with **4ad** (1.0 equiv, 0.2 mmol) and DCM (2 mL), and then DDQ (4.0 equiv, 0.8 mmol) was added. The reaction was stirred at room temperature until it was complete (monitored by TLC). Then the crude product was purified by column chromatography (ethyl acetate/petroleum ether = 1/10) on silica gel to give the product **8** as a white solid.

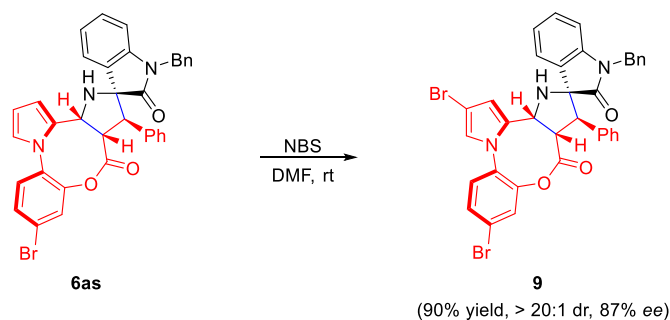

A reaction tube was charged with **6as** (1.0 equiv, 0.1 mmol) and DMF (1 mL), and then NBS (1.1 equiv, 0.11 mmol) was added. The reaction was stirred at room temperature until it was complete (monitored by TLC). After the reaction reached completion, H<sub>2</sub>O was added. The organic layer was then separated, and the aqueous layer was extracted with EtOAc three times. The organic layer was successively washed with brine. After drying over Na<sub>2</sub>SO<sub>4</sub>, the resulting solution was concentrated under reduced pressure. The crude product was purified by column chromatography (ethyl acetate/petroleum ether = 1/10) on silica gel to give the product **9** as a white solid.

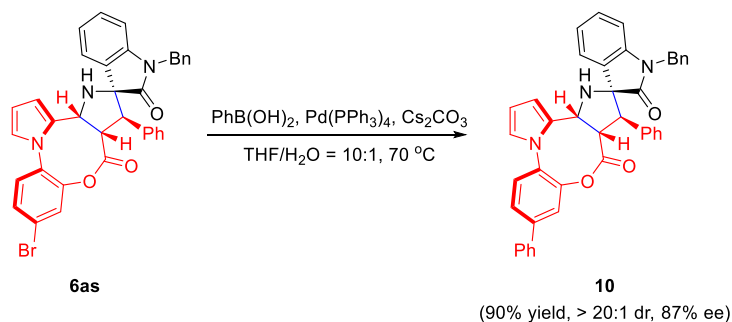

To a solution of **6as** (1.0 equiv, 0.1 mmol) in 2.0 mL THF/H<sub>2</sub>O (10:1) was added phenylboronic acid (1.5 equiv, 0.15 mmol), Pd(PPh<sub>3</sub>)<sub>4</sub> (0.15 equiv, 0.015 mmol) and Cs<sub>2</sub>CO<sub>3</sub> (1.5 equiv, 0.15 mmol). After that, the reaction system was degassed and filled with nitrogen for three times. The reaction mixture was then stirred under N<sub>2</sub> at 70 °C for 6 h. After that, the reaction mixture was washed with H<sub>2</sub>O and extracted with EtOAc. The combined organic phase was washed with brine and dried with anhydrous Na<sub>2</sub>SO<sub>4</sub>. Then the solvent was removed under reduced pressure. The crude residue was purified by silica gel column chromatography to afford pure product **10** as a yellow solid in 90% yield.

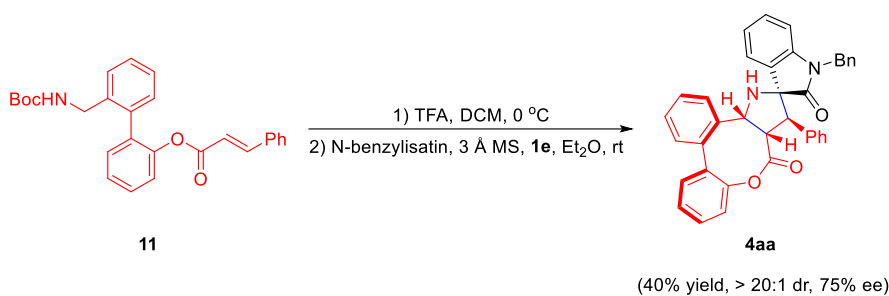

To a solution of N-Boc biaryl benzylamine **11** (1.0 equiv, 0.2 mmol) in DCM was added TFA (10.0 equiv, 2.0 mmol) at 0 °C. The mixture was stirred for 1 h at this temperature until TLC showed complete N-Boc deprotection. Evaporation of the reaction mixture was followed by coevaporation using DCM for the removal of excess TFA. Dry Et<sub>2</sub>O was added to the mixture followed by N-benzylisatin (1.1 equiv, 0.22 mmol), freshly activated 3 Å MS and catalyst **1e** (10 mol%). Then, the reaction mixture was stirred for 48 h until TLC showed complete conversion. The reaction mixture was concentrated in vacuo and purified using silica gel chromatography to give the pure product **4aa**.

## Characterization Data

### (4bR,6S,7R,7aS)-1'-Benzyl-7-phenyl-4b,5,7,7a-tetrahydro-8H-spiro[dibenzo[5,6:7,8]oxocino[4,3-b]pyrrole-6,3'-indoline]-2',8-dione (**4aa**)

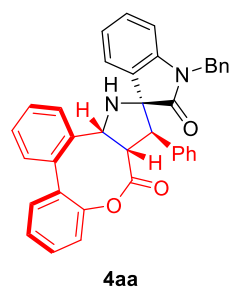

Prepared according to the procedure within 2 days as white solid (100.8 mg, 92% yield, dr > 20:1); mp 208.3 – 208.9 °C;  $[\alpha]_D^{18} = 37.98$  (*c* 0.13, CH<sub>2</sub>Cl<sub>2</sub>); <sup>1</sup>H NMR (400 MHz, CDCl<sub>3</sub>) δ 8.06 (d, *J* = 7.7 Hz, 1H), 7.79 (d, *J* = 7.1 Hz, 1H), 7.55 – 7.46 (m, 2H), 7.45 – 7.35 (m, 3H), 7.26 (d, *J* = 8.6 Hz, 2H), 7.24 – 7.02 (m, 8H), 6.96 (d, *J* = 7.6 Hz, 2H), 6.43 (d, *J* = 7.5 Hz, 2H), 6.36 (d, *J* = 7.5 Hz, 1H), 5.23 (d, *J* = 11.2 Hz, 1H), 4.89 (d, *J* = 16.0 Hz, 1H), 4.51 (t, *J* = 11.3 Hz, 1H), 4.38 (d, *J* = 11.4 Hz, 1H), 4.19 (d, *J* = 16.0 Hz, 1H), 2.25 (s, 1H); <sup>13</sup>C NMR (101 MHz, CDCl<sub>3</sub>) δ 178.9, 170.8, 149.7, 143.1, 141.0, 135.3, 134.9, 134.8, 134.0, 130.2, 130.1, 129.5, 128.9, 128.8, 128.8, 128.6, 128.5, 128.0, 128.0, 127.7, 127.2, 127.0, 126.4, 125.4, 124.1, 123.2, 121.1, 109.3, 72.0, 57.4, 54.9, 50.8, 43.3; HRMS (ESI) *m/z* Calcd. for C<sub>37</sub>H<sub>29</sub>N<sub>2</sub>O<sub>3</sub><sup>+</sup> ([M+H]<sup>+</sup>) 549.2173, Found 549.2170; Enantiomeric excess was determined to be 98% (determined by HPLC using chiral AD-H column, hexane/2-propanol = 80/20, λ = 254 nm, 30 °C, 0.8 mL/min, *t*<sub>major</sub> = 19.3 min, *t*<sub>minor</sub> = 8.0 min).

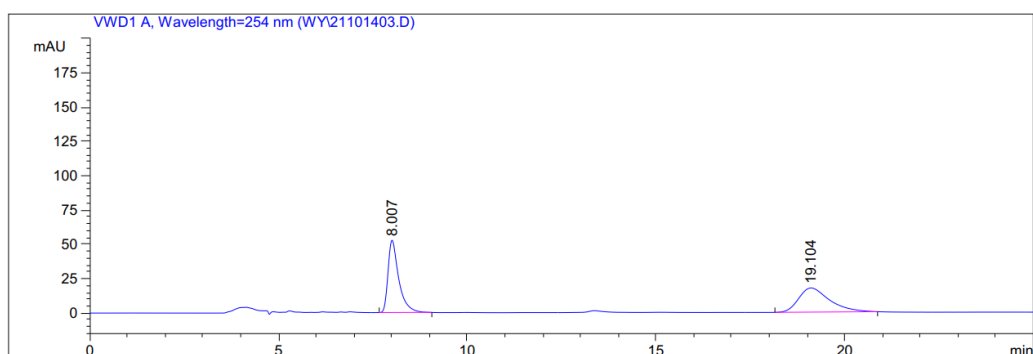

| Peak # | RetTime [min] | Type | Width [min] | Area mAU *s | Height [mAU] | Area %  |
|--------|---------------|------|-------------|-------------|--------------|---------|
| 1      | 8.007         | BB   | 0.2923      | 1043.10059  | 52.64264     | 50.8070 |
| 2      | 19.104        | BB   | 0.8400      | 1009.96289  | 17.63408     | 49.1930 |

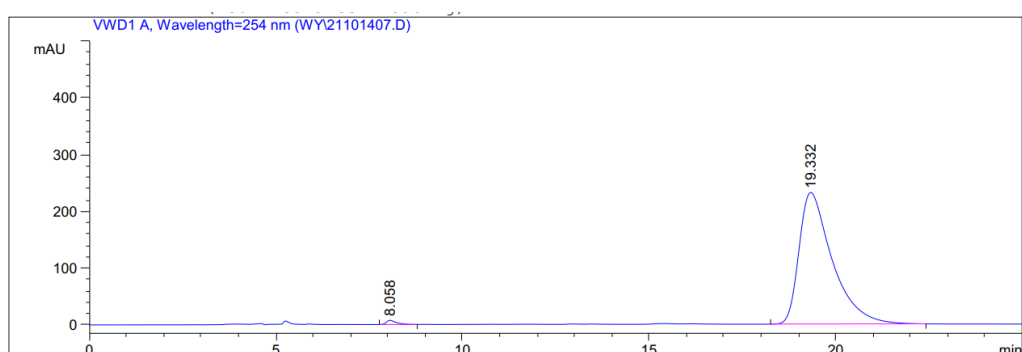

| Peak # | RetTime [min] | Type | Width [min] | Area mAU *s | Height [mAU] | Area %  |
|--------|---------------|------|-------------|-------------|--------------|---------|
| 1      | 8.058         | PB   | 0.2755      | 141.21617   | 7.48354      | 0.9728  |
| 2      | 19.332        | BB   | 0.9150      | 1.43751e4   | 232.01321    | 99.0272 |

**(4bR,6S,7R,7aS)-1'-Benzyl-7-(o-tolyl)-4b,5,7,7a-tetrahydro-8H-spiro[dibenzo[5,6:7,8]oxocino[4,3-b]pyrrole-6,3'-indoline]-2',8-dione (4ab)**

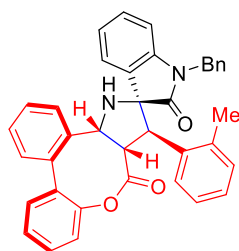

Prepared according to the procedure within 3 days as white solid (78.7 mg, 70% yield, dr > 20:1); mp 244.1 – 244.8 °C;  $[\alpha]_D^{18} = 16.47$  (c 0.17, CH<sub>2</sub>Cl<sub>2</sub>); <sup>1</sup>H NMR (400 MHz, CDCl<sub>3</sub>) δ 8.13 (d, *J* = 7.7 Hz, 1H), 7.83 (dd, *J* = 5.4, 2.9 Hz, 1H), 7.59 – 7.48 (m, 2H), 7.46 – 7.38 (m, 4H), 7.29 (d, *J* = 3.3 Hz, 1H), 7.22 – 7.08 (m, 7H), 7.07 – 6.97 (m, 2H), 6.62 (d, *J* = 7.3 Hz, 2H), 6.37 (dd, *J* = 5.7, 2.7 Hz, 1H), 5.32 (d, *J* = 11.4 Hz, 1H), 4.99 (d, *J* = 16.0 Hz, 1H), 4.87 (d, *J* = 11.1 Hz, 1H), 4.34 (t, *J* = 10.8 Hz, 1H), 4.29 (d, *J* = 16.3 Hz, 1H), 2.30 (s, 1H), 2.13 (s, 3H); <sup>13</sup>C NMR (101 MHz, CDCl<sub>3</sub>) δ 179.8, 171.1, 149.7, 143.1, 141.1, 138.7, 135.3, 135.0, 134.8, 132.9, 130.7, 130.2, 130.0, 129.5, 128.9, 128.8, 128.7, 128.6, 127.9, 127.3, 126.9, 126.6, 126.3, 125.4, 124.6, 122.7, 121.1, 109.3, 72.2, 57.8, 54.1, 49.9, 43.4, 20.0; HRMS (ESI) *m/z* Calcd. for C<sub>38</sub>H<sub>31</sub>N<sub>2</sub>O<sub>3</sub><sup>+</sup> ([M+H]<sup>+</sup>) 563.2329, Found

563.2320; Enantiomeric excess was determined to be >99% (determined by HPLC using chiral AD-H column, hexane/2-propanol = 70/30,  $\lambda = 254$  nm, 30 °C, 0.8 mL/min,  $t_{\text{major}} = 15.1$  min,  $t_{\text{minor}} = 10.3$  min).

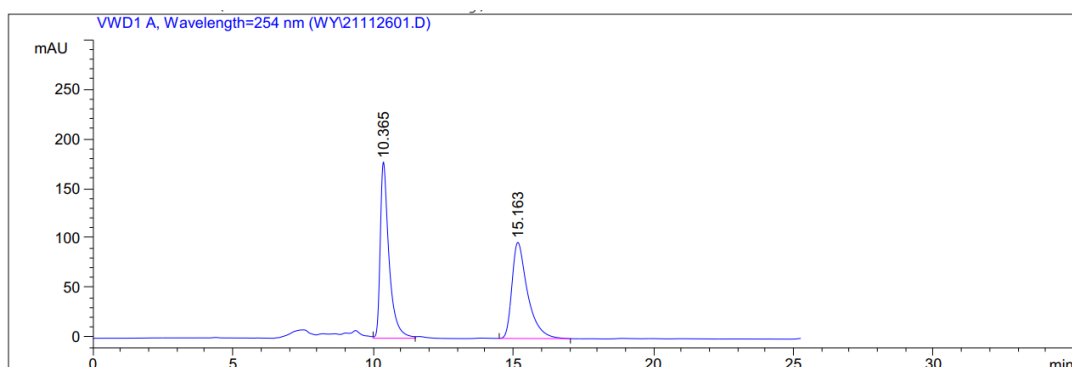

| Peak # | RetTime [min] | Type | Width [min] | Area mAU *s | Height [mAU] | Area %  |
|--------|---------------|------|-------------|-------------|--------------|---------|
| 1      | 10.365        | VB   | 0.3184      | 3874.53735  | 177.71999    | 50.6842 |
| 2      | 15.163        | BB   | 0.5744      | 3769.93750  | 96.98093     | 49.3158 |

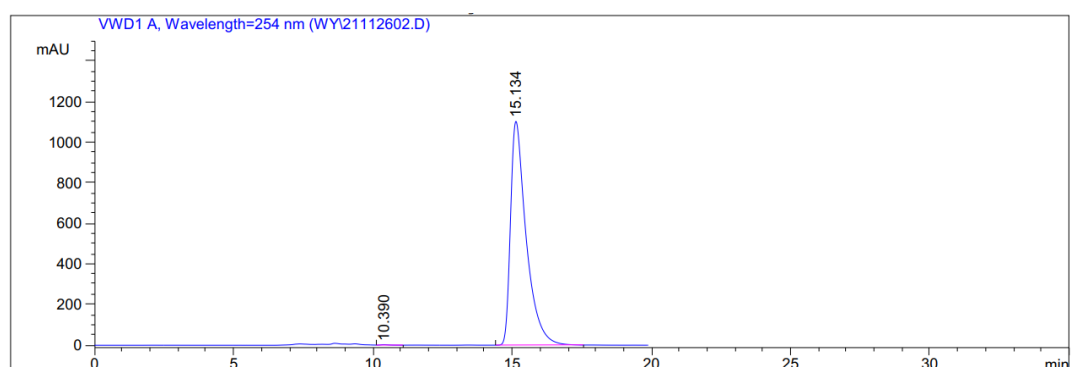

| Peak # | RetTime [min] | Type | Width [min] | Area mAU *s | Height [mAU] | Area %  |
|--------|---------------|------|-------------|-------------|--------------|---------|
| 1      | 10.390        | VP   | 0.3091      | 53.95297    | 2.48065      | 0.1249  |
| 2      | 15.134        | BB   | 0.5768      | 4.31365e4   | 1103.83032   | 99.8751 |

**(4bR,6S,7R,7aS)-1'-Benzyl-7-(2-methoxyphenyl)-4b,5,7,7a-tetrahydro-8H-spiro[dibenzo[5,6:7,8]oxocino[4,3-b]pyrrole-6,3'-indoline]-2',8-dione (4ac)**

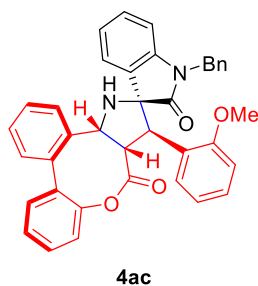

Prepared according to the procedure within 7 days as white solid (76.4 mg, 66% yield, dr > 20:1); mp 240.8 – 245.8 °C;  $[\alpha]_D^{18} = 11.74$  (c 0.41, CH<sub>2</sub>Cl<sub>2</sub>); <sup>1</sup>H NMR (400 MHz, CDCl<sub>3</sub>)  $\delta$  8.09 (d,  $J = 7.6$  Hz, 1H), 7.82 (d,  $J = 7.1$  Hz, 1H), 7.52 – 7.44 (m, 2H), 7.42 – 7.33 (m, 3H), 7.24 – 7.20 (m, 3H), 7.19 – 7.01 (m, 6H), 6.83 – 6.75 (m, 1H), 6.61 (d,  $J = 8.1$  Hz, 1H), 6.49 (d,  $J = 7.3$  Hz, 2H), 6.31 (d,  $J = 7.6$  Hz, 1H), 5.21 (d,  $J = 11.3$  Hz, 1H), 5.13 (d,  $J = 11.6$

Hz, 1H), 4.92 (d,  $J = 16.0$  Hz, 1H), 4.47 (t,  $J = 11.4$  Hz, 1H), 4.18 (d,  $J = 16.0$  Hz, 1H), 3.28 (s, 3H), 2.21 (s, 1H);  $^{13}\text{C}$  NMR (101 MHz,  $\text{CDCl}_3$ )  $\delta$  179.3, 170.8, 158.4, 149.8, 142.8, 141.2, 135.4, 135.1, 134.8, 130.2, 130.0, 129.0, 128.9, 128.8, 128.8, 128.6, 128.5, 127.9, 127.3, 127.1, 126.9, 126.4, 125.5, 125.5, 123.0, 122.4, 121.2, 120.6, 111.0, 108.7, 71.9, 57.5, 55.1, 51.6, 46.1, 43.3; HRMS (ESI)  $m/z$  Calcd. for  $\text{C}_{38}\text{H}_{31}\text{N}_2\text{O}_4^+$  ( $[\text{M}+\text{H}]^+$ ) 579.2278, Found 579.2276; Enantiomeric excess was determined to be >99% (determined by HPLC using chiral AD-H column, hexane/2-propanol = 70/30,  $\lambda = 254$  nm, 30 °C, 0.8 mL/min,  $t_{\text{major}} = 9.9$  min,  $t_{\text{minor}} = 6.7$  min).

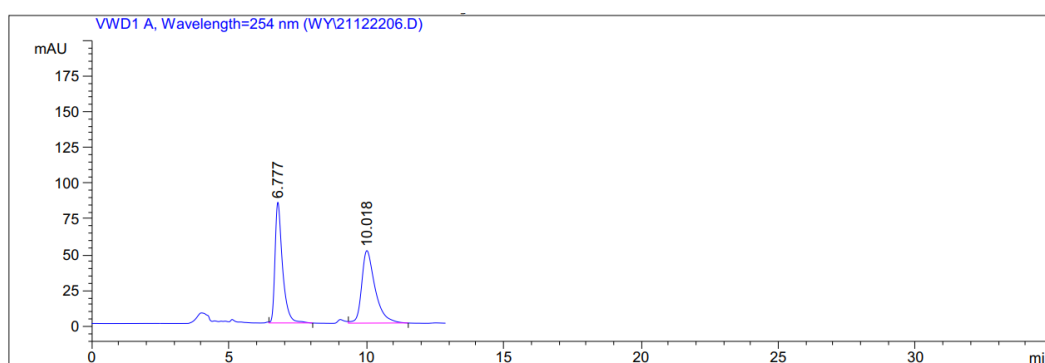

| Peak # | RetTime [min] | Type | Width [min] | Area mAU *s | Height [mAU] | Area %  |
|--------|---------------|------|-------------|-------------|--------------|---------|
| 1      | 6.777         | VB   | 0.2812      | 1613.74048  | 84.44579     | 48.2173 |
| 2      | 10.018        | VB   | 0.5089      | 1733.06641  | 50.76937     | 51.7827 |

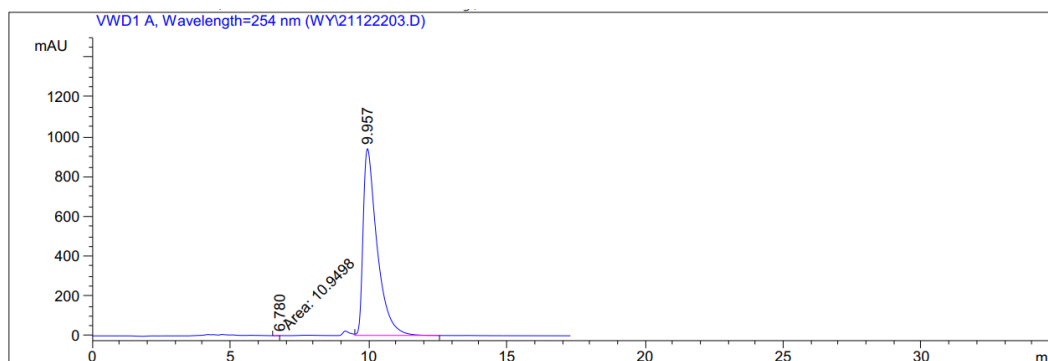

| Peak # | RetTime [min] | Type | Width [min] | Area mAU *s | Height [mAU] | Area %  |
|--------|---------------|------|-------------|-------------|--------------|---------|
| 1      | 6.780         | MM   | 0.1764      | 10.94982    | 1.03435      | 0.0331  |
| 2      | 9.957         | VB   | 0.5143      | 3.30632e4   | 938.68280    | 99.9669 |

**(4bR,6S,7R,7aS)-1'-Benzyl-7-(m-tolyl)-4b,5,7,7a-tetrahydro-8H-spiro[dibenzo[5,6:7,8]oxocino[4,3-b]pyrrole-6,3'-indoline]-2',8-dione (4ad)**

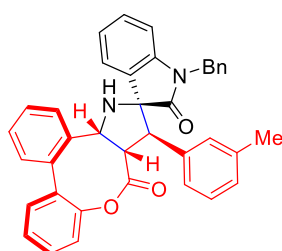

4ad

Prepared according to the procedure within 2 days as white solid (90.0 mg, 80% yield, dr > 20:1); mp 212.2 – 212.8 °C;  $[\alpha]_D^{18} = 40.10$  (c 0.21,  $\text{CH}_2\text{Cl}_2$ );  $^1\text{H}$  NMR (400 MHz,  $\text{CDCl}_3$ )  $\delta$  8.07 (d,  $J = 7.7$  Hz, 1H), 7.79 (d,  $J = 7.0$  Hz, 1H), 7.53 – 7.46



(m, 2H), 7.45 – 7.35 (m, 3H), 7.26 (d,  $J = 8.9$  Hz, 2H), 7.21 – 7.11 (m, 3H), 7.08 – 6.98 (m, 4H), 6.76 (d,  $J = 6.5$  Hz, 1H), 6.71 (s, 1H), 6.43 (d,  $J = 7.5$  Hz, 2H), 6.36 (d,  $J = 7.5$  Hz, 1H), 5.22 (d,  $J = 10.1$  Hz, 1H), 4.93 (d,  $J = 16.0$  Hz, 1H), 4.49 (t,  $J = 11.3$  Hz, 1H), 4.34 (d,  $J = 11.4$  Hz, 1H), 4.17 (d,  $J = 16.0$  Hz, 1H), 2.24 (s, 1H), 2.09 (s, 3H);  $^{13}\text{C}$  NMR (101 MHz,  $\text{CDCl}_3$ )  $\delta$  178.9, 170.8, 149.7, 143.2, 141.1, 137.9, 135.3, 134.9, 134.8, 133.9, 130.2, 130.1, 129.5, 129.0, 128.9, 128.8, 128.7, 128.6, 128.5, 128.4, 128.0, 127.2, 127.0, 126.3, 125.4, 125.0, 124.1, 123.1, 121.1, 109.2, 72.0, 57.4, 54.8, 50.8, 43.3, 21.4; HRMS (ESI)  $m/z$  Calcd. for  $\text{C}_{38}\text{H}_{31}\text{N}_2\text{O}_3^+$  ( $[\text{M}+\text{H}]^+$ ) 563.2329, Found 563.2322; Enantiomeric excess was determined to be >99% (determined by HPLC using chiral AD-H column, hexane/2-propanol = 70/30,  $\lambda = 254$  nm, 30 °C, 0.8 mL/min,  $t_{\text{major}} = 15.7$  min,  $t_{\text{minor}} = 10.6$  min).

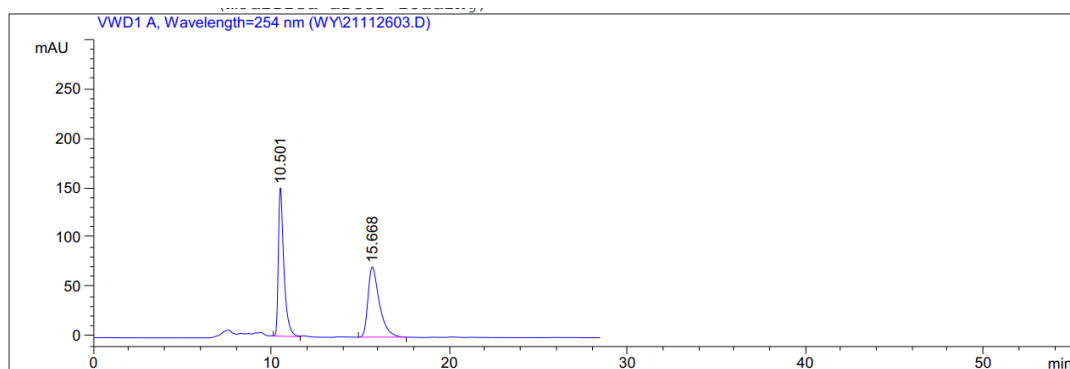

| Peak # | RetTime [min] | Type | Width [min] | Area mAU *s | Height [mAU] | Area %  |
|--------|---------------|------|-------------|-------------|--------------|---------|
| 1      | 10.501        | VB   | 0.3169      | 3229.41284  | 149.87688    | 50.4627 |
| 2      | 15.668        | BB   | 0.6613      | 3170.18579  | 71.12328     | 49.5373 |

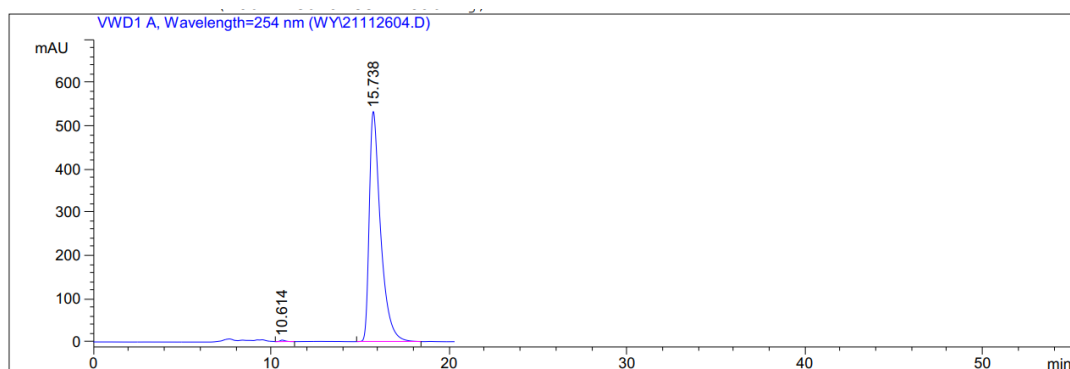

| Peak # | RetTime [min] | Type | Width [min] | Area mAU *s | Height [mAU] | Area %  |
|--------|---------------|------|-------------|-------------|--------------|---------|
| 1      | 10.614        | VB   | 0.3093      | 75.28782    | 3.56114      | 0.3185  |
| 2      | 15.738        | BB   | 0.6531      | 2.35628e4   | 532.49054    | 99.6815 |

**(4bR,6S,7R,7aS)-1'-Benzyl-7-(p-tolyl)-4b,5,7,7a-tetrahydro-8H-spiro[dibenzo[5,6:7,8]oxocino[4,3-b]pyrrole-6,3'-indoline]-2',8-dione (4ae)**

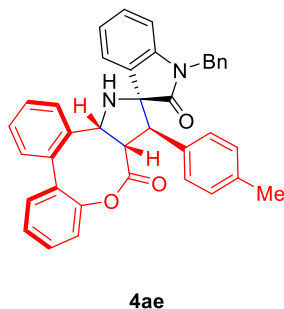

Prepared according to the procedure within 3 days as white solid (78.8 mg, 70% yield, dr > 20:1); mp 212.6 – 213.5 °C;  $[\alpha]_D^{18} = 58.97$  (*c* 0.15, CH<sub>2</sub>Cl<sub>2</sub>); <sup>1</sup>H NMR (400 MHz, CDCl<sub>3</sub>) δ 8.06 (d, *J* = 7.7 Hz, 1H), 7.78 (d, *J* = 6.4 Hz, 1H), 7.53 – 7.46 (m, 2H), 7.44 – 7.32 (m, 3H), 7.25 – 7.22 (m, 2H), 7.20 – 7.11 (m, 3H), 7.08 – 7.02 (m, 2H), 6.91 (d, *J* = 8.0 Hz, 2H), 6.84 (d, *J* = 8.1 Hz, 2H), 6.48 (d, *J* = 7.4 Hz, 2H), 6.36 (d, *J* = 7.3 Hz, 1H), 5.22 (d, *J* = 11.2 Hz, 1H), 4.93 (d, *J* = 16.0 Hz, 1H), 4.47 (t, *J* = 11.3 Hz, 1H), 4.34 (d, *J* = 11.4 Hz, 1H), 4.18 (d, *J* = 16.0 Hz, 1H), 2.28 (s, 3H), 2.24 (s, 1H); <sup>13</sup>C NMR (101 MHz, CDCl<sub>3</sub>) δ 179.0, 170.8, 149.7, 143.1, 141.0, 137.2, 135.3, 134.9, 134.8, 131.0, 130.2, 130.1, 129.4, 129.2, 128.9, 128.9, 128.8, 128.5, 127.9, 127.2, 126.9, 126.5, 125.4, 124.1, 123.1, 121.1, 109.2, 72.0, 57.4, 54.6, 51.0, 43.3, 21.2; HRMS (ESI) *m/z* Calcd. for C<sub>38</sub>H<sub>31</sub>N<sub>2</sub>O<sub>3</sub><sup>+</sup> ([M+H]<sup>+</sup>) 563.2329, Found 563.2320; Enantiomeric excess was determined to be 99% (determined by HPLC using chiral AD-H column, hexane/2-propanol = 70/30, λ = 254 nm, 30 °C, 0.8 mL/min, *t*<sub>major</sub> = 13.4 min, *t*<sub>minor</sub> = 5.9 min).

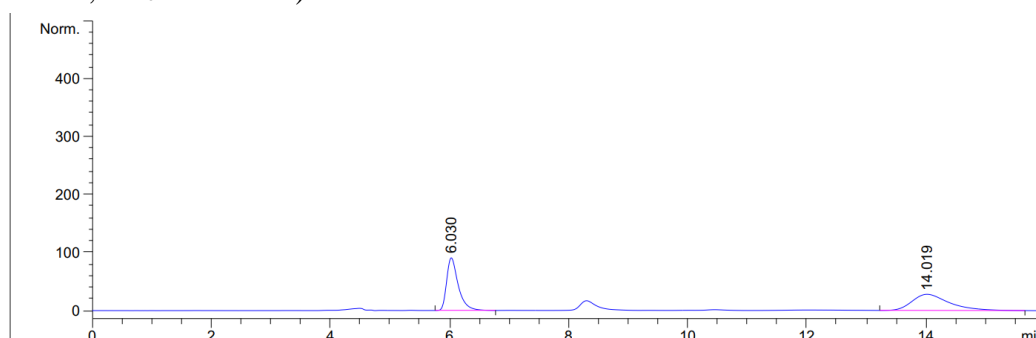

| Peak # | RetTime [min] | Type | Width [min] | Area mAU * s | Height [mAU] | Area %  |
|--------|---------------|------|-------------|--------------|--------------|---------|
| 1      | 6.030         | BP   | 0.2032      | 1227.62463   | 90.63689     | 50.0682 |
| 2      | 14.019        | VB   | 0.6566      | 1224.27844   | 27.95267     | 49.9318 |

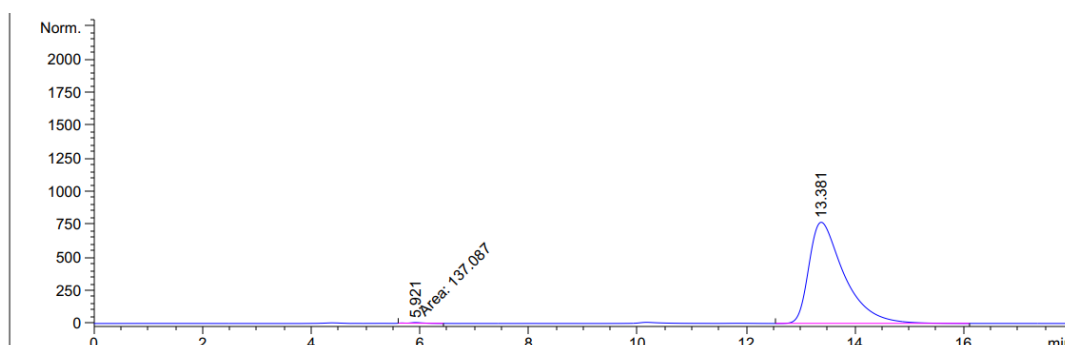

| Peak # | RetTime [min] | Type | Width [min] | Area mAU *s | Height [mAU] | Area %  |
|--------|---------------|------|-------------|-------------|--------------|---------|
| 1      | 5.921         | MM   | 0.3552      | 137.08684   | 6.43182      | 0.3962  |
| 2      | 13.381        | VB   | 0.6690      | 3.44610e4   | 766.07513    | 99.6038 |

**(4bR,6S,7R,7aS)-1'-Benzyl-7-(4-methoxyphenyl)-4b,5,7,7a-tetrahydro-8H-spiro[dibenzo[5,6:7,8]oxocino[4,3-b]pyrrole-6,3'-indoline]-2',8-dione (4af)**

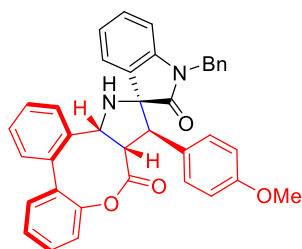

4af

Prepared according to the procedure within 4 days as white solid (106.47 mg, 92% yield, dr > 20:1); mp 238.7 – 239.5 °C;  $[\alpha]_D^{18} = 75.42$  (*c* 0.18, CH<sub>2</sub>Cl<sub>2</sub>); <sup>1</sup>H NMR (400 MHz, CDCl<sub>3</sub>) δ 8.06 (d, *J* = 7.7 Hz, 1H), 7.78 (d, *J* = 7.1 Hz, 1H), 7.55 – 7.46 (m, 2H), 7.44 – 7.35 (m, 3H), 7.25 – 7.23 (m, 2H), 7.21 – 7.11 (m, 3H), 7.09 – 7.04 (m, 2H), 6.87 (d, *J* = 8.6 Hz, 2H), 6.63 (d, *J* = 8.6 Hz, 2H), 6.45 (d, *J* = 7.5 Hz,

2H), 6.38 (d, *J* = 7.3 Hz, 1H), 5.21 (d, *J* = 11.2 Hz, 1H), 4.93 (d, *J* = 16.0 Hz, 1H), 4.45 (t, *J* = 11.3 Hz, 1H), 4.33 (d, *J* = 11.4 Hz, 1H), 4.19 (d, *J* = 16.0 Hz, 1H), 3.72 (s, 3H), 2.24 (s, 1H); <sup>13</sup>C NMR (101 MHz, CDCl<sub>3</sub>) δ 179.0, 170.8, 159.2, 149.7, 143.1, 141.0, 135.3, 134.9, 134.8, 130.2, 130.1, 129.5, 129.0, 128.9, 128.9, 128.8, 128.5, 127.9, 127.3, 126.9, 126.4, 126.0, 125.4, 124.1, 123.2, 121.1, 113.9, 109.2, 72.0, 57.4, 55.1, 54.3, 51.0, 43.3; HRMS (ESI) *m/z* Calcd. for C<sub>38</sub>H<sub>31</sub>N<sub>2</sub>O<sub>4</sub><sup>+</sup> ([M+H]<sup>+</sup>) 579.2278, Found 579.2271; Enantiomeric excess was determined to be 91% (determined by HPLC using chiral AD-H column, hexane/2-propanol = 70/30, λ = 254 nm, 30 °C, 0.8 mL/min, *t*<sub>major</sub> = 19.4 min, *t*<sub>minor</sub> = 32.9 min).

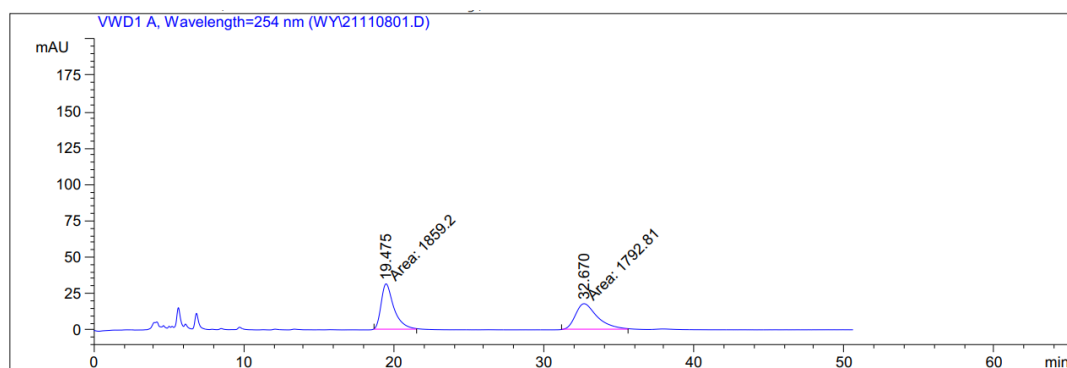

| Peak # | RetTime [min] | Type | Width [min] | Area mAU *s | Height [mAU] | Area %  |
|--------|---------------|------|-------------|-------------|--------------|---------|
| 1      | 19.475        | MM   | 0.9918      | 1859.19836  | 31.24228     | 50.9089 |
| 2      | 32.670        | MM   | 1.6953      | 1792.81445  | 17.62515     | 49.0911 |

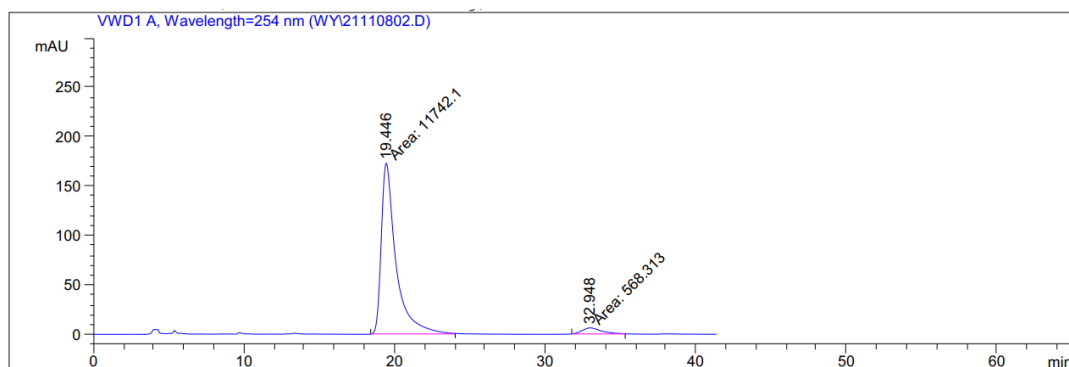

| Peak # | RetTime [min] | Type | Width [min] | Area mAU *s | Height [mAU] | Area %  |
|--------|---------------|------|-------------|-------------|--------------|---------|
| 1      | 19.446        | MM   | 1.1334      | 1.17421e4   | 172.66150    | 95.3835 |
| 2      | 32.948        | MM   | 1.5245      | 568.31262   | 6.21327      | 4.6165  |

**(4bR,6S,7R,7aS)-1'-Benzyl-7-(4-fluorophenyl)-4b,5,7,7a-tetrahydro-8H-spiro[dibenzo[5,6:7,8]oxocino[4,3-b]pyrrole-6,3'-indoline]-2',8-dione (4ag)**

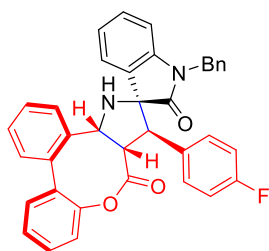

**4ag**

Prepared according to the procedure within 6 days as white solid (70.26 mg, 62% yield, dr > 20:1); mp 188.1 – 189.0 °C;  $[\alpha]_D^{18} = 22.96$  (c 0.10, CH<sub>2</sub>Cl<sub>2</sub>); <sup>1</sup>H NMR (400 MHz, CDCl<sub>3</sub>) δ 8.06 (d, *J* = 7.7 Hz, 1H), 7.81 – 7.76 (m, 1H), 7.55 – 7.47 (m, 2H), 7.46 – 7.37 (m, 3H), 7.29 – 7.27 (m, 2H), 7.23 – 7.09 (m, 5H), 6.95 – 6.90 (m, 2H), 6.81 – 6.75 (m, 2H), 6.51 (d, *J* = 7.1 Hz, 2H), 6.43 (dd, *J* = 6.5, 2.0 Hz, 1H), 5.22 (d, *J* = 11.0 Hz,

1H), 4.89 (d, *J* = 15.9 Hz, 1H), 4.44 (t, *J* = 11.2 Hz, 1H), 4.35 (d, *J* = 11.4 Hz, 1H), 4.23 (d, *J* = 16.0 Hz, 1H), 2.27 (s, 1H); <sup>13</sup>C NMR (101 MHz, CDCl<sub>3</sub>) δ 178.7, 170.7, 162.5 (d, *J* = 198.0 Hz), 149.6, 143.1, 140.8, 135.3, 134.8, 134.7, 130.2, 130.1, 129.9 (d, *J* = 3.0 Hz), 129.7, 129.6, 128.9, 128.8, 128.6, 128.6, 128.0, 127.4, 127.0, 126.4, 125.4, 124.1, 123.3, 121.1, 115.4 (d, *J* = 17.2 Hz), 109.3, 71.9, 57.3, 54.2, 51.1, 43.3; <sup>19</sup>F NMR (377 MHz, CDCl<sub>3</sub>) δ -114.55; HRMS (ESI) *m/z* Calcd. for C<sub>37</sub>H<sub>28</sub>FN<sub>2</sub>O<sub>3</sub><sup>+</sup> ([M+H]<sup>+</sup>) 567.2078, Found 567.2069; Enantiomeric excess was determined to be >99% (determined by HPLC using chiral AD-H column, hexane/2-propanol = 70/30, λ = 254 nm, 30 °C, 0.8 mL/min, *t*<sub>major</sub> = 25.9 min, *t*<sub>minor</sub> = 7.2 min).

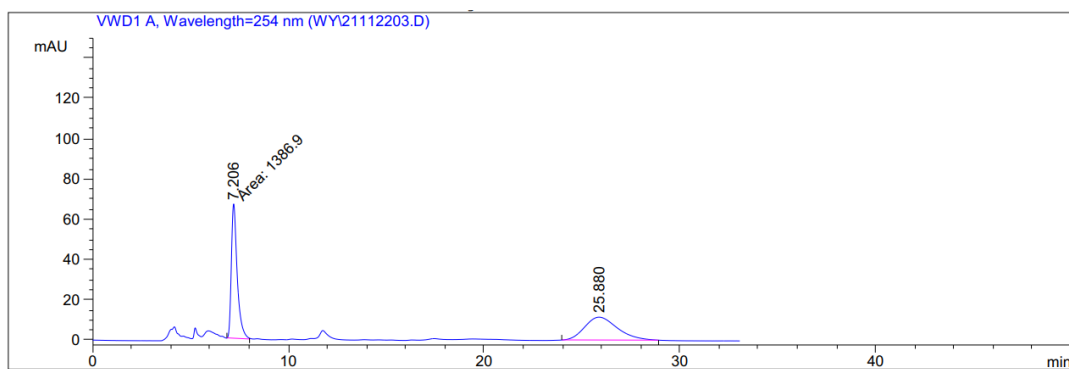

| Peak # | RetTime [min] | Type | Width [min] | Area mAU *s | Height [mAU] | Area %  |
|--------|---------------|------|-------------|-------------|--------------|---------|
| 1      | 7.206         | MM   | 0.3470      | 1386.90039  | 66.60762     | 51.1050 |
| 2      | 25.880        | BB   | 1.3685      | 1326.92517  | 11.39727     | 48.8950 |

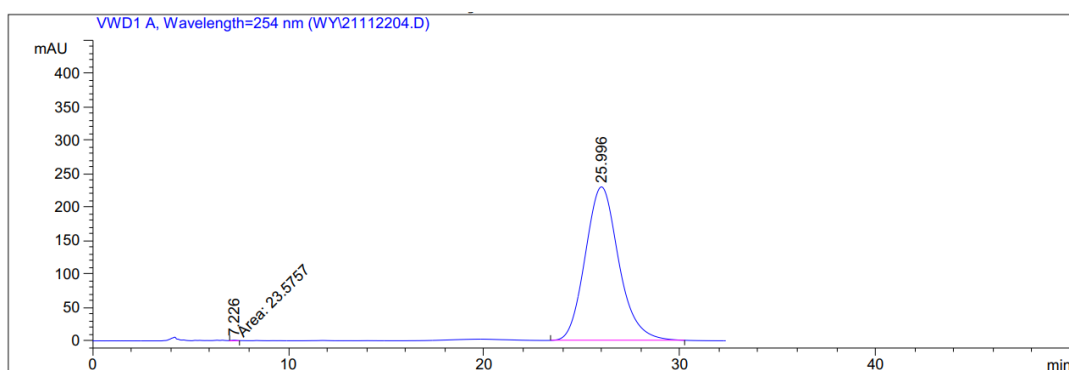

| Peak # | RetTime [min] | Type | Width [min] | Area mAU *s | Height [mAU] | Area %  |
|--------|---------------|------|-------------|-------------|--------------|---------|
| 1      | 7.226         | MM   | 0.3781      | 23.57570    | 1.03921      | 0.0862  |
| 2      | 25.996        | BB   | 1.8046      | 2.73352e4   | 229.73177    | 99.9138 |

**(4bR,6S,7R,7aS)-1'-Benzyl-7-(naphthalen-1-yl)-4b,5,7,7a-tetrahydro-8H-spiro[dibenzo[5,6:7,8]oxocino[4,3-b]pyrrole-6,3'-indoline]-2',8-dione (4ah)**

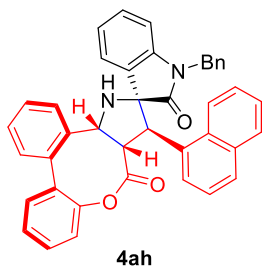

Prepared according to the procedure within 4 days as white solid (101.78 mg, 85% yield, dr > 20:1); mp 258.4 – 259.0 °C;  $[\alpha]_D^{18} = -109.70$  (c 0.69, CH<sub>2</sub>Cl<sub>2</sub>); <sup>1</sup>H NMR (400 MHz, CDCl<sub>3</sub>) δ 8.15 (d, *J* = 7.7 Hz, 1H), 8.02 (d, *J* = 8.5 Hz, 1H), 7.93 (d, *J* = 7.3 Hz, 1H), 7.68 (d, *J* = 7.9 Hz, 2H), 7.58 (d, *J* = 7.3 Hz, 1H), 7.54 – 7.44 (m, 2H), 7.44 – 7.34 (m, 3H), 7.30 – 7.21 (m, 4H),

7.17 (d, *J* = 7.8 Hz, 1H), 7.11 – 7.05 (m, 2H), 7.01 – 6.96 (m, 2H), 6.94 – 6.88 (m, 1H), 6.37 (d, *J* = 7.5 Hz, 2H), 6.10 (d, *J* = 7.8 Hz, 1H), 5.45 (d, *J* = 11.0 Hz, 1H), 5.36 (d, *J* = 11.3 Hz, 1H), 4.82 (d, *J* = 16.0 Hz, 1H), 4.56 (t, *J* = 11.2 Hz, 1H), 4.14 (d, *J* = 16.0 Hz, 1H), 2.33 (s, 1H); <sup>13</sup>C NMR (101 MHz, CDCl<sub>3</sub>) δ 179.5, 171.0, 149.8, 142.9, 141.1, 135.4, 134.9, 134.8, 133.8, 132.7, 131.0, 130.3, 130.1, 129.5, 129.0, 128.9, 128.6, 128.3, 128.2, 128.0, 127.2, 127.0, 126.4, 125.6, 125.5, 125.5, 125.2, 124.5,

124.5, 123.8, 122.8, 121.2, 109.2, 72.5, 57.8, 53.8, 48.4, 43.3; HRMS (ESI)  $m/z$  Calcd. for  $C_{41}H_{31}N_2O_3^+$  ( $[M+H]^+$ ) 599.2329, Found 599.2321; Enantiomeric excess was determined to be >99% (determined by HPLC using chiral AD-H column, hexane/2-propanol = 70/30,  $\lambda = 254$  nm, 30 °C, 0.8 mL/min,  $t_{major} = 12.0$  min,  $t_{minor} = 8.6$  min).

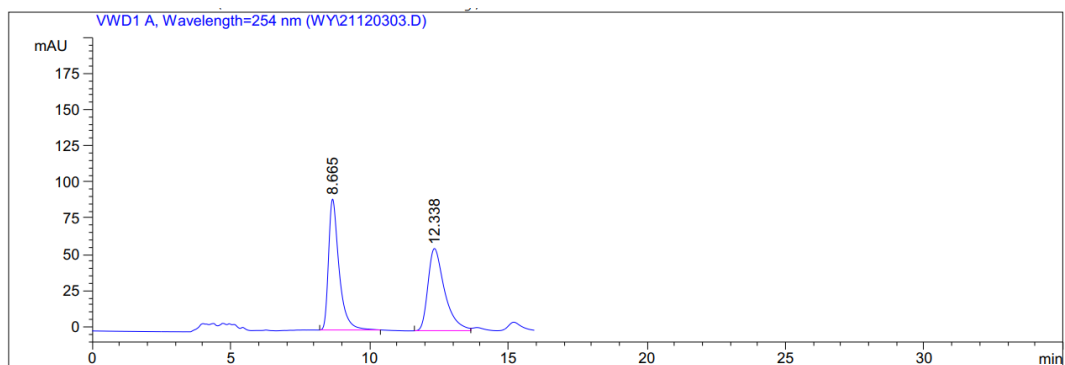

| Peak # | RetTime [min] | Type | Width [min] | Area mAU *s | Height [mAU] | Area %  |
|--------|---------------|------|-------------|-------------|--------------|---------|
| 1      | 8.665         | BB   | 0.3940      | 2388.73706  | 90.44166     | 50.0669 |
| 2      | 12.338        | BV   | 0.6271      | 2382.35693  | 56.85996     | 49.9331 |

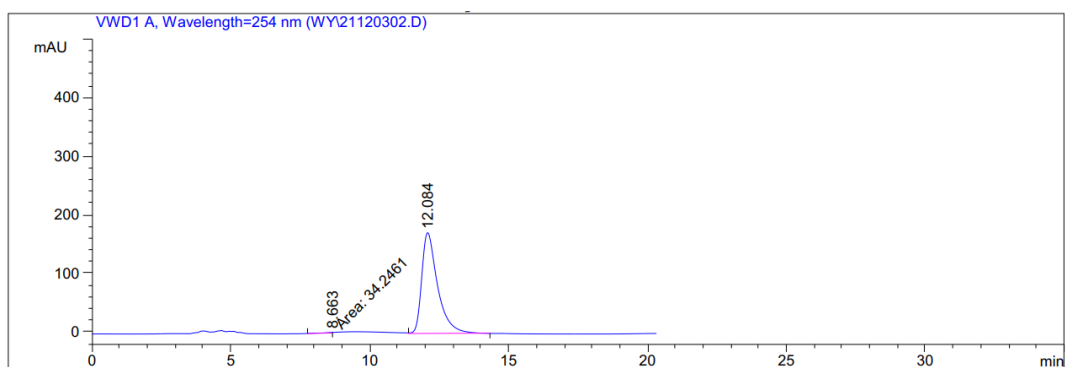

| Peak # | RetTime [min] | Type | Width [min] | Area mAU *s | Height [mAU] | Area %  |
|--------|---------------|------|-------------|-------------|--------------|---------|
| 1      | 8.663         | MM   | 0.4935      | 34.24607    | 1.15658      | 0.4985  |
| 2      | 12.084        | VB   | 0.5891      | 6835.82324  | 171.91708    | 99.5015 |

**(4bR,6S,7S,7aS)-1'-Benzyl-7-(thiophen-2-yl)-4b,5,7,7a-tetrahydro-8H-spiro[dibenzo[5,6:7,8]oxocino[4,3-b]pyrrole-6,3'-indoline]-2',8-dione (4ai)**

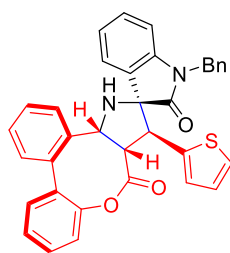

4ai

Prepared according to the procedure within 4 days as white solid (66.56 mg, 60% yield, dr > 20:1); mp 222.3 – 222.1 °C;  $[\alpha]_D^{18} = 55.77$  (c 0.52,  $CH_2Cl_2$ );  $^1H$  NMR (400 MHz,  $CDCl_3$ )  $\delta$  7.99 (d,  $J = 7.7$  Hz, 1H), 7.77 – 7.68 (m, 1H), 7.53 – 7.43 (m, 2H), 7.42 – 7.33 (m, 3H), 7.28 (d,  $J = 8.0$  Hz, 1H), 7.24 – 7.17 (m, 3H), 7.17 – 7.08 (m, 3H), 7.02 (d,  $J = 5.0$  Hz, 1H), 6.84 – 6.76 (m, 1H), 6.62 – 6.57 (m, 3H), 6.51 – 6.44 (m, 1H), 5.19 (dd,  $J = 11.1, 3.5$  Hz, 1H), 4.92 (d,  $J = 15.9$  Hz, 1H), 4.58 (d,  $J = 11.1$  Hz, 1H), 4.41 (t,  $J = 11.2$  Hz,

1H), 4.25 (d,  $J = 15.9$  Hz, 1H), 2.18 (s, 1H);  $^{13}\text{C}$  NMR (101 MHz,  $\text{CDCl}_3$ )  $\delta$  178.4, 170.6, 149.6, 143.6, 140.7, 137.4, 135.3, 135.0, 134.7, 130.2, 129.9, 128.9, 128.9, 128.7, 128.3, 128.1, 127.3, 127.1, 126.9, 126.6, 125.4, 125.3, 124.5, 124.2, 123.3, 121.2, 109.3, 71.5, 57.3, 52.9, 50.5, 43.4; HRMS (ESI)  $m/z$  Calcd. for  $\text{C}_{35}\text{H}_{27}\text{N}_2\text{O}_3\text{S}^+$  ( $[\text{M}+\text{H}]^+$ ) 555.1737, Found 555.1728; Enantiomeric excess was determined to be 95% (determined by HPLC using chiral AD-H column, hexane/2-propanol = 70/30,  $\lambda = 254$  nm, 30 °C, 0.8 mL/min,  $t_{\text{major}} = 19.8$  min,  $t_{\text{minor}} = 10.0$  min).

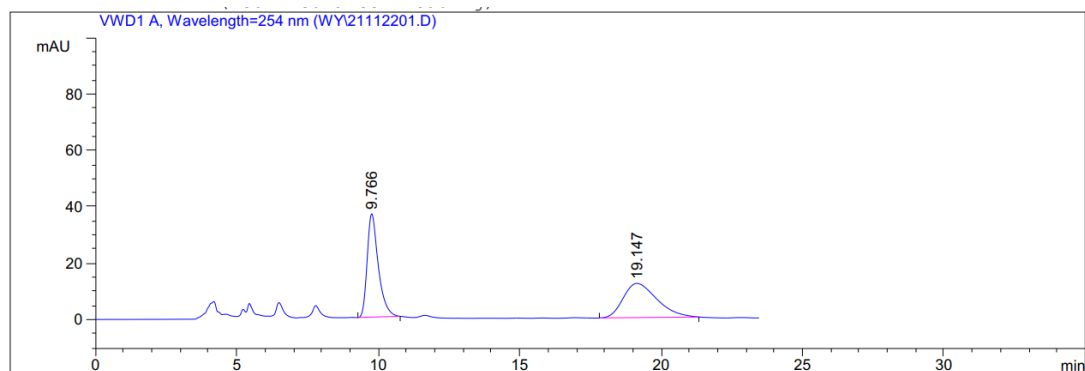

| Peak # | RetTime [min] | Type | Width [min] | Area mAU *s | Height [mAU] | Area %  |
|--------|---------------|------|-------------|-------------|--------------|---------|
| 1      | 9.766         | PB   | 0.4095      | 1008.69080  | 36.70193     | 49.8833 |
| 2      | 19.147        | BB   | 1.1072      | 1013.41003  | 12.16640     | 50.1167 |

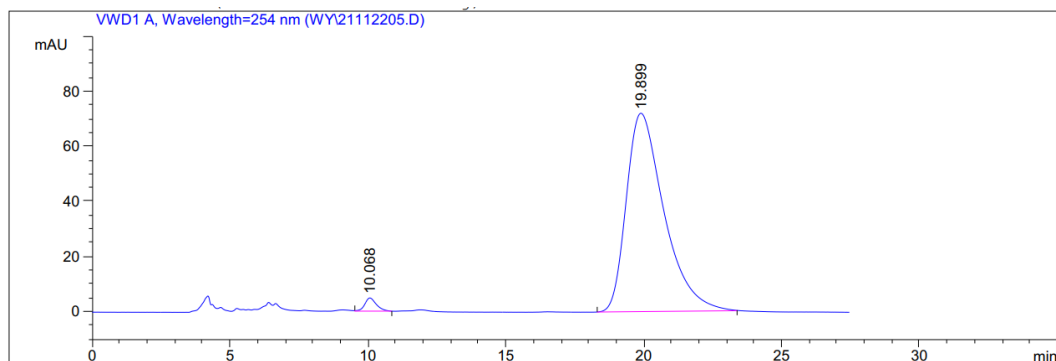

| Peak # | RetTime [min] | Type | Width [min] | Area mAU *s | Height [mAU] | Area %  |
|--------|---------------|------|-------------|-------------|--------------|---------|
| 1      | 10.068        | VB   | 0.4409      | 142.56955   | 4.82462      | 2.0373  |
| 2      | 19.899        | BB   | 1.3962      | 6855.50879  | 72.09888     | 97.9627 |

**(4bR,6S,7S,7aS)-1'-Benzyl-7-methyl-4b,5,7,7a-tetrahydro-8H-spiro[dibenzo[5,6:7,8]oxocino[4,3-b]pyrrole-6,3'-indoline]-2',8-dione (4aj)**

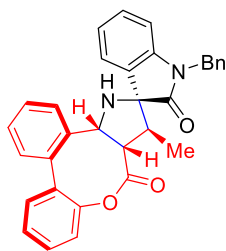

**4aj**

Prepared according to the procedure within 3 days as white solid (89.53 mg, 92% yield, dr > 20:1); mp 140.5 – 141.3 °C;  $[\alpha]_D^{18} = -127.07$  (*c* 0.53, CH<sub>2</sub>Cl<sub>2</sub>); <sup>1</sup>H NMR (400 MHz, CDCl<sub>3</sub>) δ 7.98 (d, *J* = 7.7 Hz, 1H), 7.56 (d, *J* = 7.1 Hz, 1H), 7.47 – 7.40 (m, 2H), 7.37 – 7.30 (m, 3H), 7.25 – 7.18 (m, 8H), 7.15 – 7.09 (m, 1H), 6.72 (d, *J* = 7.7 Hz, 1H), 4.97 (d, *J* = 3.0 Hz, 1H), 4.93 (d, *J* = 7.5 Hz, 1H), 4.62 (d, *J* = 15.6 Hz, 1H), 3.64 (t, *J* = 11.1 Hz, 1H), 3.19 – 3.08 (m, 1H), 2.02 (s, 1H), 0.82 (d, *J* = 6.8 Hz, 3H); <sup>13</sup>C NMR (101 MHz, CDCl<sub>3</sub>) δ 179.5, 171.4, 149.6, 143.4, 141.2, 135.8, 135.3, 134.7, 130.0, 129.9, 129.4, 129.1, 128.9, 128.8, 128.7, 127.9, 127.8, 127.3, 126.9, 125.5, 124.1, 123.3, 121.3, 109.1, 70.8, 57.5, 53.7, 44.9, 43.7, 12.4; HRMS (ESI) *m/z* Calcd. for C<sub>32</sub>H<sub>27</sub>N<sub>2</sub>O<sub>3</sub><sup>+</sup> ([M+H]<sup>+</sup>) 487.2016, Found 487.2013; Enantiomeric excess was determined to be 92% (determined by HPLC using chiral AD-H column, hexane/2-propanol = 70/30, λ = 254 nm, 30 °C, 0.8 mL/min, *t*<sub>major</sub> = 18.3 min, *t*<sub>minor</sub> = 12.4 min).

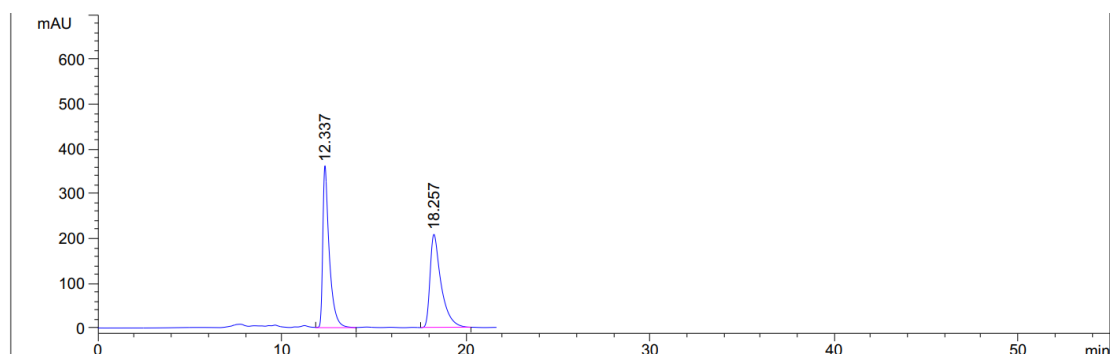

| Peak # | RetTime [min] | Type | Width [min] | Area mAU * s | Height [mAU] | Area %  |
|--------|---------------|------|-------------|--------------|--------------|---------|
| 1      | 12.337        | VB   | 0.3512      | 8847.62988   | 361.34042    | 50.5158 |
| 2      | 18.257        | VB   | 0.6100      | 8666.93359   | 207.94753    | 49.4842 |

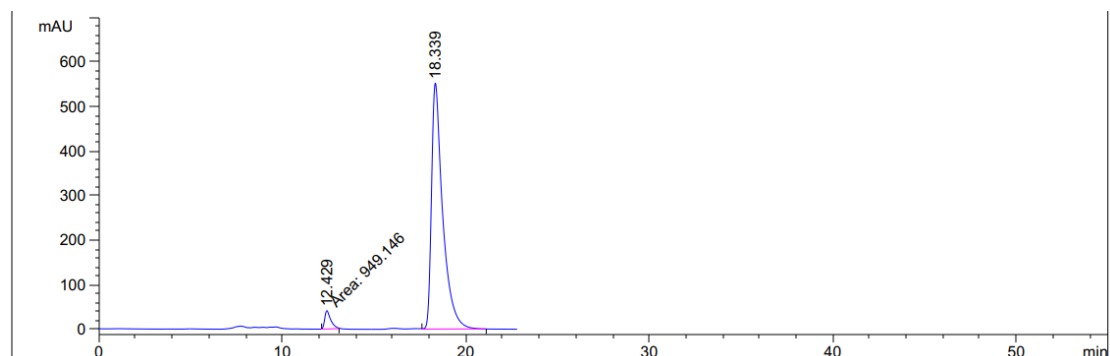



| Peak # | RetTime [min] | Type | Width [min] | Area mAU *s | Height [mAU] | Area %  |
|--------|---------------|------|-------------|-------------|--------------|---------|
| 1      | 12.429        | MM   | 0.3845      | 949.14594   | 41.13959     | 3.9019  |
| 2      | 18.339        | VB   | 0.6148      | 2.33760e4   | 552.14771    | 96.0981 |

**(4bR,6S,7R,7aS)-1'-Benzyl-10-methyl-7-phenyl-4b,5,7,7a-tetrahydro-8H-spiro[dibenzo[5,6:7,8]oxocino[4,3-b]pyrrole-6,3'-indoline]-2',8-dione (4ak)**

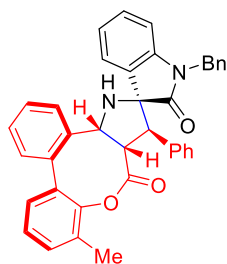

**4ak**

Prepared according to the procedure within 4 days as white solid (105.78 mg, 94% yield, dr > 20:1); mp 262.3 – 263.3 °C;  $[\alpha]_D^{18} = -7.12$  (c 0.50, CH<sub>2</sub>Cl<sub>2</sub>); <sup>1</sup>H NMR (400 MHz, CDCl<sub>3</sub>) δ 8.04 (d, *J* = 7.6 Hz, 1H), 7.78 (d, *J* = 6.9 Hz, 1H), 7.48 – 7.43 (m, 1H), 7.38 – 7.28 (m, 3H), 7.24 – 7.17 (m, 4H), 7.14 – 7.01 (m, 6H), 6.96 (d, *J* = 7.5 Hz, 2H), 6.41 (d, *J* = 7.3 Hz, 2H), 6.35 (d, *J* = 7.5 Hz, 1H), 5.25 – 5.10 (m, 1H), 4.88 (d, *J* = 16.0 Hz, 1H), 4.37 (d, *J* = 4.6 Hz, 2H), 4.17 (d, *J* = 16.0 Hz, 1H), 2.26 (s, 3H), 2.18 (s, 1H); <sup>13</sup>C NMR (101 MHz, CDCl<sub>3</sub>) δ 178.8, 171.1, 148.0, 143.1, 141.0, 135.8, 134.9, 134.7, 134.1, 131.4, 130.1, 129.6, 128.8, 128.7, 128.7, 128.6, 127.9, 127.9, 127.8, 127.6, 127.2, 126.7, 126.3, 125.4, 124.2, 123.2, 109.3, 72.1, 57.3, 54.7, 51.1, 43.3, 16.8; HRMS (ESI) *m/z* Calcd. for C<sub>38</sub>H<sub>31</sub>N<sub>2</sub>O<sub>3</sub><sup>+</sup> ([M+H]<sup>+</sup>) 563.2329, Found 563.2319; Enantiomeric excess was determined to be 85% (determined by HPLC using chiral AD-H column, hexane/2-propanol = 70/30, λ = 254 nm, 30 °C, 0.8 mL/min, *t*<sub>major</sub> = 14.6 min, *t*<sub>minor</sub> = 5.7 min).

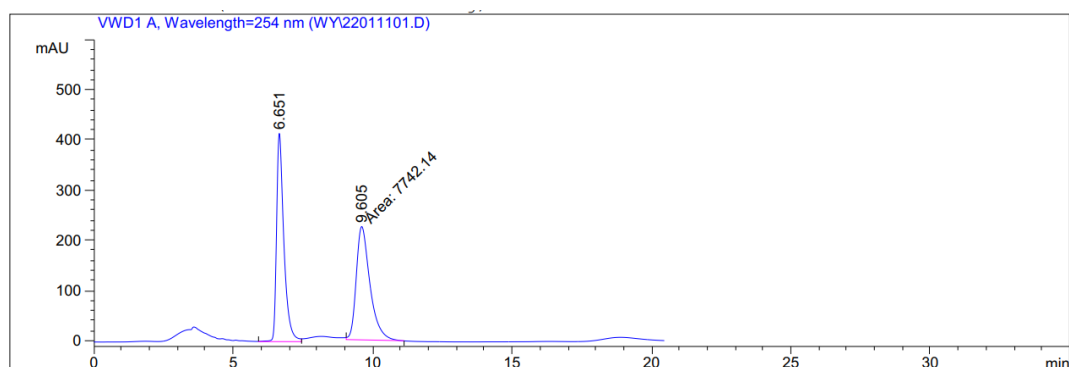

| Peak # | RetTime [min] | Type | Width [min] | Area mAU *s | Height [mAU] | Area %  |
|--------|---------------|------|-------------|-------------|--------------|---------|
| 1      | 6.651         | BV   | 0.2702      | 7590.18896  | 414.99014    | 49.5045 |
| 2      | 9.605         | MM   | 0.5712      | 7742.13867  | 225.89011    | 50.4955 |

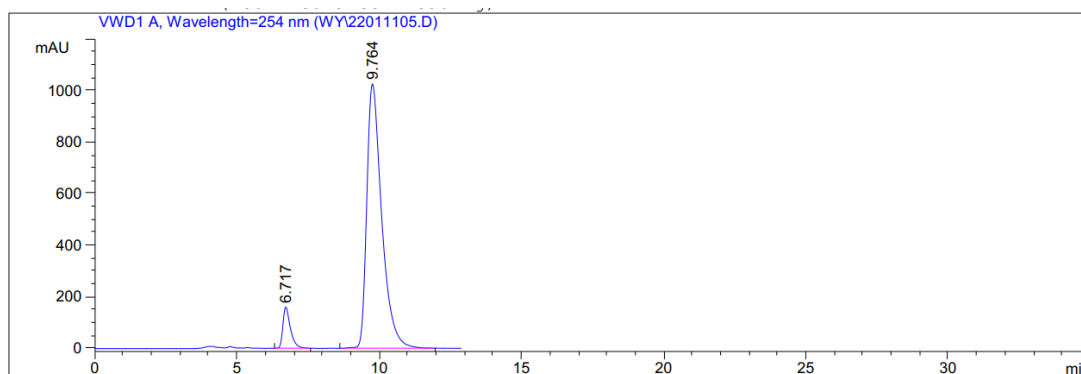

| Peak # | RetTime [min] | Type | Width [min] | Area mAU*s | Height [mAU] | Area %  |
|--------|---------------|------|-------------|------------|--------------|---------|
| 1      | 6.717         | VB   | 0.2738      | 2958.68994 | 160.12941    | 7.3262  |
| 2      | 9.764         | VB   | 0.5494      | 3.74266e4  | 1025.96362   | 92.6738 |

**(4bR,6S,7R,7aS)-1'-Benzyl-10-methoxy-7-phenyl-4b,5,7,7a-tetrahydro-8H-spiro[dibenzo[5,6:7,8]oxocino[4,3-b]pyrrole-6,3'-indoline]-2',8-dione (4aI)**

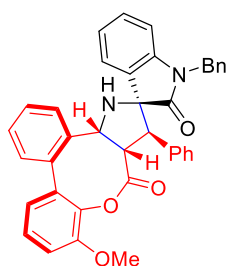

**4aI**

Prepared according to the procedure within 4 days as white solid (63.65 mg, 55% yield, dr > 20:1); mp 286.5 – 287.3 °C;  $[\alpha]_D^{18} = -2.68$  (c 0.11, CH<sub>2</sub>Cl<sub>2</sub>); <sup>1</sup>H NMR (400 MHz, CDCl<sub>3</sub>) δ 8.06 (d, *J* = 7.5 Hz, 1H), 7.80 (d, *J* = 6.7 Hz, 1H), 7.52 – 7.46 (m, 1H), 7.42 – 7.32 (m, 2H), 7.29 (d, *J* = 7.1 Hz, 1H), 7.23 – 7.14 (m, 3H), 7.14 – 7.02 (m, 6H), 7.00 – 6.93 (m, 3H), 6.42 (d, *J* = 7.0 Hz, 2H), 6.37 (d, *J* = 7.2 Hz, 1H), 5.19 (d, *J* = 10.1 Hz, 1H), 4.89 (d, *J* = 16.0 Hz, 1H), 4.49 – 4.34 (m, 2H), 4.18 (d, *J* = 15.9 Hz, 1H), 3.91 (s, 3H), 2.23 (s, 1H); <sup>13</sup>C NMR (101 MHz, CDCl<sub>3</sub>) δ 178.9, 171.1, 151.2, 143.1, 140.9, 138.4, 136.2, 135.4, 134.8, 134.1, 129.5, 128.9, 128.7, 128.6, 128.4, 127.9, 127.6, 127.3, 127.2, 126.3, 125.6, 124.2, 123.2, 121.1, 112.4, 109.3, 71.9, 57.1, 56.1, 54.4, 50.4, 43.3; HRMS (ESI) *m/z* Calcd. for C<sub>38</sub>H<sub>31</sub>N<sub>2</sub>O<sub>4</sub><sup>+</sup> ([M+H]<sup>+</sup>) 579.2278, Found 579.2276; Enantiomeric excess was determined to be 49% (determined by HPLC using chiral AD-H column, hexane/2-propanol = 70/30, λ = 254 nm, 30 °C, 0.8 mL/min, *t*<sub>major</sub> = 15.0 min, *t*<sub>minor</sub> = 7.5 min).

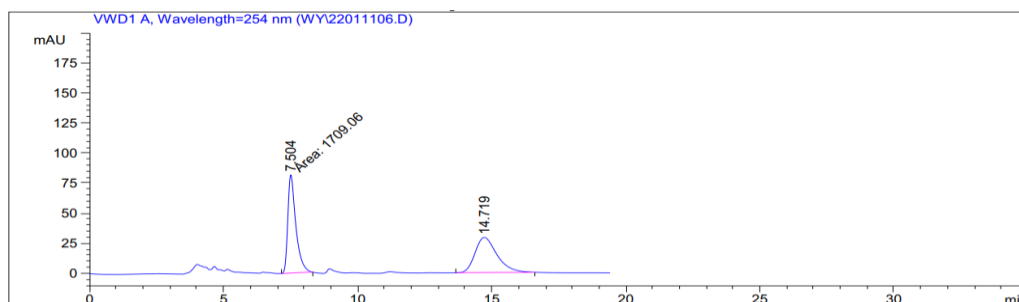

| Peak # | RetTime [min] | Type | Width [min] | Area mAU *s | Height [mAU] | Area %  |
|--------|---------------|------|-------------|-------------|--------------|---------|
| 1      | 7.504         | MM   | 0.3476      | 1709.06018  | 81.94855     | 50.4844 |
| 2      | 14.719        | BB   | 0.8555      | 1676.26624  | 29.35551     | 49.5156 |

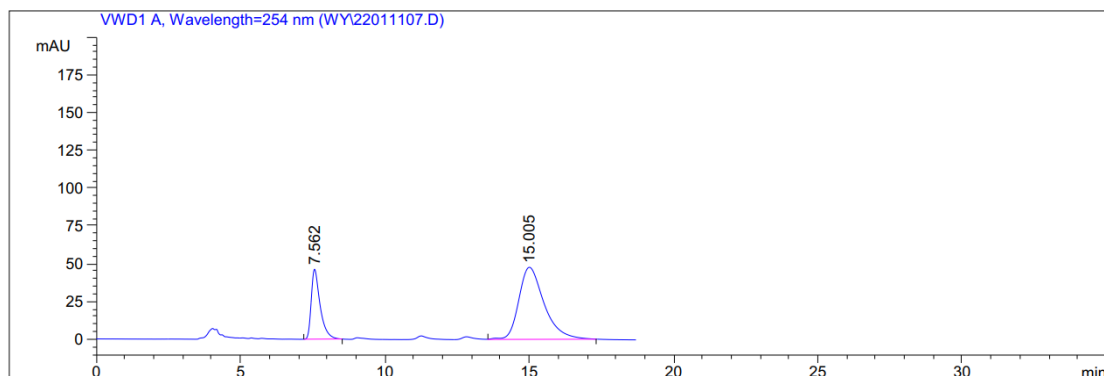

| Peak # | RetTime [min] | Type | Width [min] | Area mAU *s | Height [mAU] | Area %  |
|--------|---------------|------|-------------|-------------|--------------|---------|
| 1      | 7.562         | BB   | 0.3178      | 995.78351   | 46.32310     | 25.4284 |
| 2      | 15.005        | BB   | 0.9132      | 2920.24194  | 47.73516     | 74.5716 |

**(4bR,6S,7R,7aS)-1'-Benzyl-10-fluoro-7-phenyl-4b,5,7,7a-tetrahydro-8H-spiro[dibenzo[5,6:7,8]oxocino[4,3-b]pyrrole-6,3'-indoline]-2',8-dione (4am)**

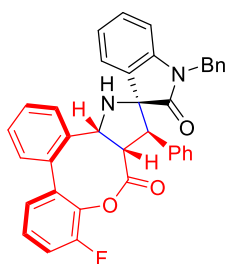

**4am**

Prepared according to the procedure within 3 days as white solid (99.73 mg, 88% yield, dr > 20:1); mp 282.0 – 282.8 °C;  $[\alpha]_D^{18} = 53.61$  (c 0.66, CH<sub>2</sub>Cl<sub>2</sub>); <sup>1</sup>H NMR (400 MHz, CDCl<sub>3</sub>) δ 8.12 (d, *J* = 7.7 Hz, 1H), 7.81 (d, *J* = 6.8 Hz, 1H), 7.55 – 7.50 (m, 1H), 7.43 – 7.28 (m, 4H), 7.25 – 7.06 (m, 9H), 7.00 (d, *J* = 7.5 Hz, 2H), 6.47 (d, *J* = 7.3 Hz, 2H), 6.40 (d, *J* = 7.4 Hz, 1H), 5.22 (d, *J* = 11.2 Hz, 1H), 4.93 (d, *J* = 16.0 Hz, 1H), 4.55 (t, *J* = 11.4 Hz, 1H), 4.39 (d, *J* = 11.4 Hz, 1H), 4.21 (d, *J* = 16.0 Hz, 1H), 2.20 (s, 1H); <sup>13</sup>C NMR (101 MHz, CDCl<sub>3</sub>) δ 178.8, 170.0, 153.8 (d, *J* = 252.5 Hz), 143.2, 141.0, 137.3, 137.3 (d, *J* = 12.1 Hz), 134.8, 134.3, 134.3, 133.7, 129.7, 129.3, 128.7, 128.6, 128.6, 128.2, 127.9, 127.6, 127.5, 127.3, 126.4, 125.8, 125.0 (d, *J* = 3.0 Hz), 124.1, 123.3, 116.9 (d, *J* = 21.2 Hz), 109.4, 71.9, 57.1, 54.6, 50.7, 43.3; <sup>19</sup>F NMR (377 MHz, CDCl<sub>3</sub>) δ -128.72; HRMS (ESI) *m/z* Calcd. for C<sub>37</sub>H<sub>28</sub>FN<sub>2</sub>O<sub>3</sub><sup>+</sup> ([M+H]<sup>+</sup>) 567.2078, Found 567.2071; Enantiomeric excess was determined to be >99% (determined by HPLC using chiral AD-H column, hexane/2-propanol = 70/30, λ = 254 nm, 30 °C, 0.8 mL/min, *t*<sub>major</sub> = 18.5 min, *t*<sub>minor</sub> = 6.8 min).

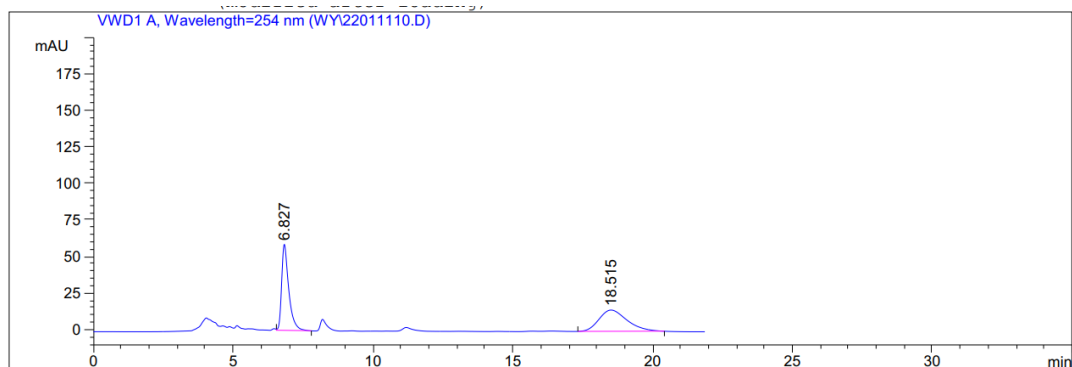

| Peak # | RetTime [min] | Type | Width [min] | Area mAU *s | Height [mAU] | Area %  |
|--------|---------------|------|-------------|-------------|--------------|---------|
| 1      | 6.827         | VB   | 0.2611      | 1047.31812  | 58.95049     | 50.4810 |
| 2      | 18.515        | BB   | 0.9317      | 1027.35779  | 14.59801     | 49.5190 |

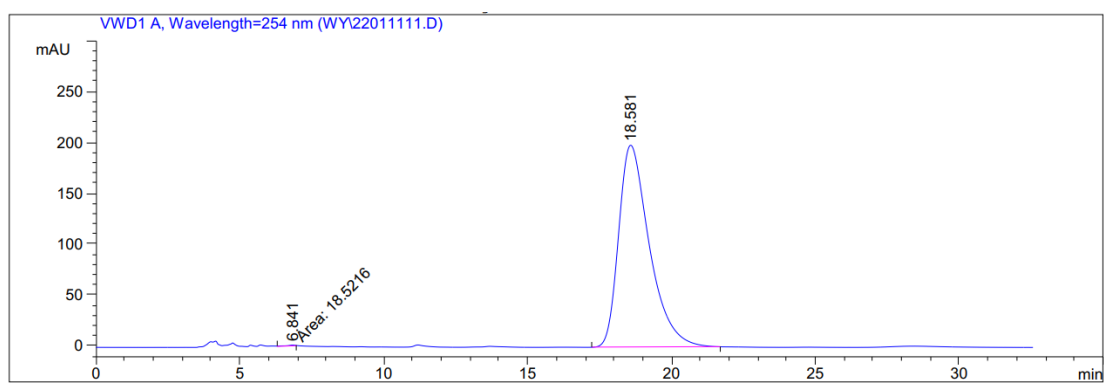

| Peak # | RetTime [min] | Type | Width [min] | Area mAU *s | Height [mAU] | Area %  |
|--------|---------------|------|-------------|-------------|--------------|---------|
| 1      | 6.841         | MM   | 0.4077      | 18.52155    | 7.57161e-1   | 0.1254  |
| 2      | 18.581        | BB   | 1.1214      | 1.47470e4   | 198.53874    | 99.8746 |

**(4bR,6S,7R,7aS)-1'-Benzyl-11-methoxy-7-phenyl-4b,5,7,7a-tetrahydro-8H-spiro[dibenzo[5,6:7,8]oxocino[4,3-b]pyrrole-6,3'-indoline]-2',8-dione (4an)**

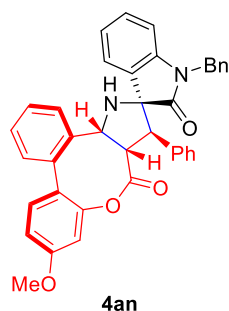

Prepared according to the procedure within 4 days as white solid (81.01 mg, 70% yield, dr > 20:1); mp 172.6 – 173.8 °C;  $[\alpha]_D^{18} = 19.21$  (c 0.33, CH<sub>2</sub>Cl<sub>2</sub>); <sup>1</sup>H NMR (400 MHz, CDCl<sub>3</sub>) δ 8.03 (d, *J* = 7.7 Hz, 1H), 7.79 (d, *J* = 7.2 Hz, 1H), 7.48 – 7.43 (m, 1H), 7.38 – 7.33 (m, 1H), 7.30 (d, *J* = 8.4 Hz, 1H), 7.23 – 7.16 (m, 3H), 7.16 – 7.03 (m, 6H), 6.99 – 6.93 (m, 3H), 6.79 (d, *J* = 2.4 Hz, 1H), 6.45 (d, *J* = 7.3 Hz, 2H), 6.36 (d, *J* = 7.4 Hz, 1H), 5.26 (d, *J* = 11.2 Hz, 1H), 4.89 (d, *J* = 16.0 Hz, 1H), 4.54 (t, *J* = 11.3 Hz, 1H), 4.37 (d, *J* = 11.3 Hz, 1H), 4.20 (d, *J* = 16.0 Hz, 1H), 3.89 (s, 3H), 2.23 (s, 1H); <sup>13</sup>C NMR (101 MHz, CDCl<sub>3</sub>) δ 178.9, 170.7, 160.9, 150.4, 143.1, 141.2, 135.2, 134.9, 134.1, 130.7, 129.5, 129.3,

128.8, 128.6, 128.6, 128.5, 128.1, 127.9, 127.8, 127.2, 126.8, 126.4, 125.4, 124.1, 123.2, 112.5, 109.3, 106.9, 72.0, 57.5, 55.7, 55.0, 50.7, 43.3; HRMS (ESI)  $m/z$  Calcd. for  $C_{38}H_{31}N_2O_4^+$  ( $[M+H]^+$ ) 579.2278, Found 579.2270; Enantiomeric excess was determined to be 95% (determined by HPLC using chiral AD-H column, hexane/2-propanol = 70/30,  $\lambda = 254$  nm, 30 °C, 0.8 mL/min,  $t_{major} = 28.9$  min,  $t_{minor} = 6.7$  min).

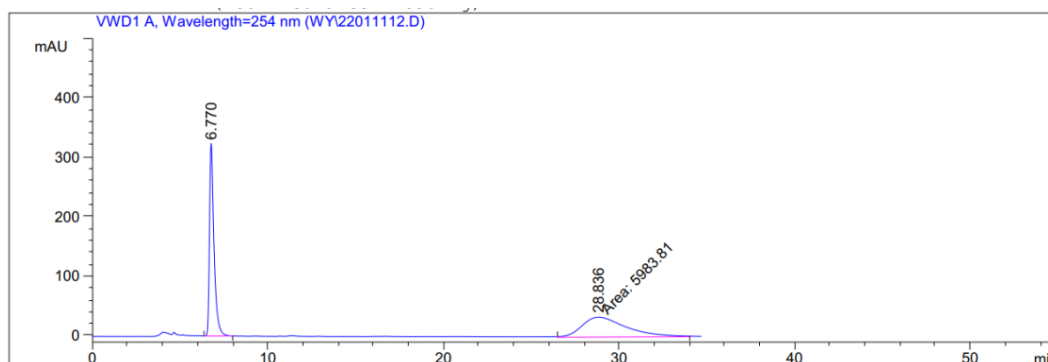

| Peak # | RetTime [min] | Type | Width [min] | Area mAU *s | Height [mAU] | Area %  |
|--------|---------------|------|-------------|-------------|--------------|---------|
| 1      | 6.770         | VB   | 0.2625      | 5785.02686  | 323.46078    | 49.1555 |
| 2      | 28.836        | MM   | 2.9578      | 5983.81055  | 33.71758     | 50.8445 |

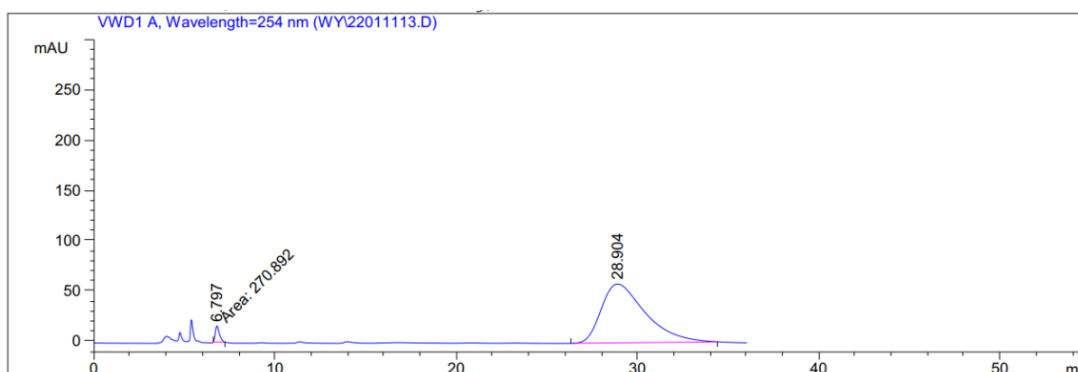

| Peak # | RetTime [min] | Type | Width [min] | Area mAU *s | Height [mAU] | Area %  |
|--------|---------------|------|-------------|-------------|--------------|---------|
| 1      | 6.797         | MM   | 0.2756      | 270.89197   | 16.38338     | 2.6576  |
| 2      | 28.904        | BB   | 2.2921      | 9922.18848  | 58.57800     | 97.3424 |

**(4bR,6S,7R,7aS)-1'-Benzyl-12-methyl-7-phenyl-4b,5,7,7a-tetrahydro-8H-spiro[dibenzo[5,6:7,8]oxocino[4,3-b]pyrrole-6,3'-indoline]-2',8-dione (4ao)**

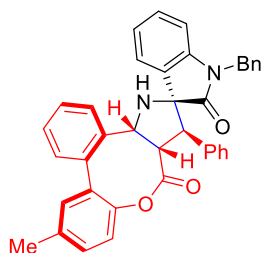

Prepared according to the procedure within 3 days as white solid (110.28 mg, 98% yield, dr > 20:1); mp 205.8 – 106.7 °C;  $[\alpha]_D^{18} = 51.86$  ( $c$  0.80,  $CH_2Cl_2$ );  $^1H$  NMR (400 MHz,  $CDCl_3$ )  $\delta$  8.07 (d,  $J = 7.7$  Hz, 1H), 7.81 (d,  $J = 7.2$  Hz, 1H), 7.53 – 7.47 (m, 1H), 7.42 – 7.37 (m, 1H), 7.33 – 7.27 (m, 2H), 7.25 – 7.18

(m, 3H), 7.18 – 7.05 (m, 7H), 6.98 (d,  $J = 7.6$  Hz, 2H), 6.47 (d,  $J = 7.4$  Hz, 2H), 6.38 (d,  $J = 7.4$  Hz, 1H), 5.28 (d,  $J = 11.2$  Hz, 1H), 4.90 (d,  $J = 16.0$  Hz, 1H), 4.53 (t,  $J = 11.3$  Hz, 1H), 4.40 (d,  $J = 11.4$  Hz, 1H), 4.22 (d,  $J = 16.0$  Hz, 1H), 2.47 (s, 3H), 2.28 (s, 1H);  $^{13}\text{C}$  NMR (101 MHz,  $\text{CDCl}_3$ )  $\delta$  178.9, 171.1, 147.5, 143.1, 140.9, 136.7, 135.5, 134.9, 134.4, 134.1, 130.6, 129.5, 128.9, 128.8, 128.7, 128.6, 128.5, 128.1, 127.9, 127.7, 127.2, 126.4, 125.4, 124.1, 123.2, 120.8, 109.3, 72.1, 57.5, 55.0, 50.7, 43.3, 21.0; HRMS (ESI)  $m/z$  Calcd. for  $\text{C}_{38}\text{H}_{31}\text{N}_2\text{O}_3^+$  ( $[\text{M}+\text{H}]^+$ ) 563.2329, Found 563.2322; Enantiomeric excess was determined to be 95% (determined by HPLC using chiral AD-H column, hexane/2-propanol = 70/30,  $\lambda = 254$  nm, 30 °C, 0.8 mL/min,  $t_{\text{major}} = 12.4$  min,  $t_{\text{minor}} = 6.1$  min).

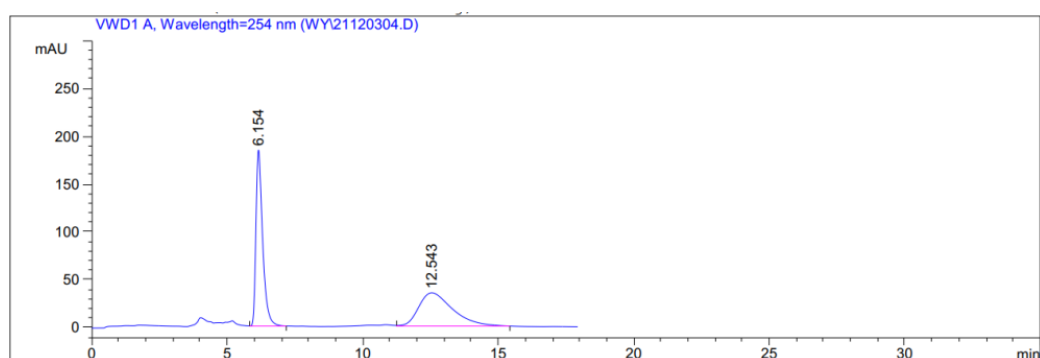

| Peak # | RetTime [min] | Type | Width [min] | Area mAU *s | Height [mAU] | Area %  |
|--------|---------------|------|-------------|-------------|--------------|---------|
| 1      | 6.154         | VB   | 0.2577      | 3170.27612  | 184.09076    | 50.8701 |
| 2      | 12.543        | VB   | 1.2538      | 3061.82642  | 34.94222     | 49.1299 |

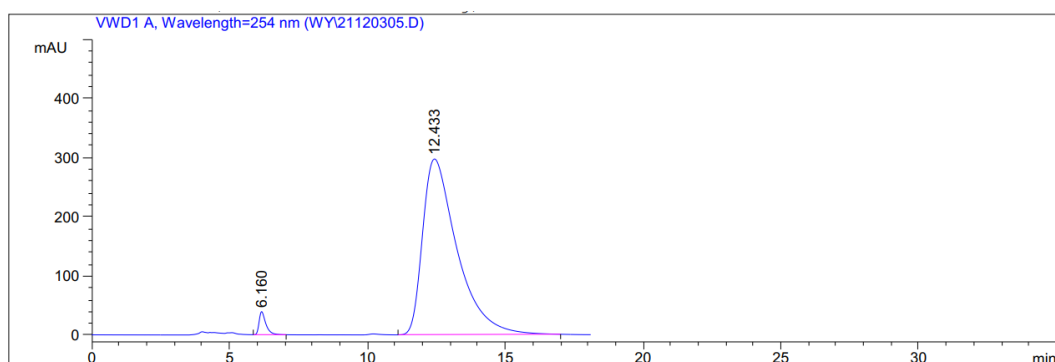

| Peak # | RetTime [min] | Type | Width [min] | Area mAU *s | Height [mAU] | Area %  |
|--------|---------------|------|-------------|-------------|--------------|---------|
| 1      | 6.160         | VB   | 0.2544      | 672.30438   | 39.12313     | 2.5381  |
| 2      | 12.433        | BB   | 1.2836      | 2.58167e4   | 296.95450    | 97.4619 |

**(4bR,6S,7R,7aS)-1'-Benzyl-12-fluoro-7-phenyl-4b,5,7,7a-tetrahydro-8H-spiro[dibenzo[5,6:7,8]oxocino[4,3-b]pyrrole-6,3'-indoline]-2',8-dione (4ap)**

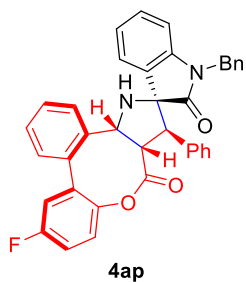

Prepared according to the procedure within 3 days as white solid (104.26 mg, 92% yield, dr > 20:1); mp 252.9 – 254.0 °C;  $[\alpha]_D^{18} = 41.91$  (c 0.42, CH<sub>2</sub>Cl<sub>2</sub>); <sup>1</sup>H NMR (400 MHz, CDCl<sub>3</sub>) δ 8.06 (d, *J* = 7.5 Hz, 1H), 7.77 (d, *J* = 6.7 Hz, 1H), 7.51 – 7.45 (m, 1H), 7.40 – 7.34 (m, 1H), 7.24 – 7.03 (m, 12H), 6.96 (d, *J* = 7.1 Hz, 2H), 6.45 (d, *J* = 7.0 Hz, 2H), 6.36 (d, *J* = 7.2 Hz, 1H), 5.23 (d, *J* = 10.9 Hz, 1H), 4.89 (d, *J* = 16.0 Hz, 1H), 4.49 (t, *J* = 11.2 Hz, 1H), 4.35 (d, *J* = 11.2 Hz, 1H), 4.19 (d, *J* = 15.9 Hz, 1H), 2.22 (s, 1H); <sup>13</sup>C NMR (101 MHz, CDCl<sub>3</sub>) δ 178.8, 170.7, 160.5 (d, *J* = 248.5 Hz), 145.8, 145.7, 143.1, 140.8, 136.5 (d, *J* = 8.1 Hz), 134.8, 134.3, 133.9, 129.6, 129.3, 128.7, 128.6, 128.6, 128.1, 128.0, 127.8, 127.2, 126.4, 125.7, 124.1, 123.2, 122.7 (d, *J* = 9.1 Hz), 116.9 (d, *J* = 12.1 Hz), 116.7 (d, *J* = 11.1 Hz), 109.4, 72.0, 57.3, 54.9, 50.8, 43.3; <sup>19</sup>F NMR (377 MHz, CDCl<sub>3</sub>) δ -114.68; HRMS (ESI) *m/z* Calcd. for C<sub>37</sub>H<sub>28</sub>FN<sub>2</sub>O<sub>3</sub><sup>+</sup> ([M+H]<sup>+</sup>) 567.2078, Found 567.2073; Enantiomeric excess was determined to be 99% (determined by HPLC using chiral AD-H column, hexane/2-propanol = 70/30, λ = 254 nm, 30 °C, 0.8 mL/min, *t*<sub>major</sub> = 12.4 min, *t*<sub>minor</sub> = 7.1 min).

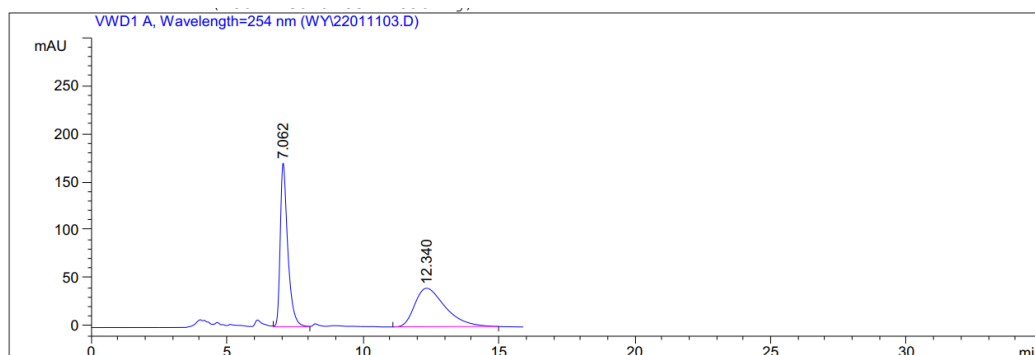

| Peak # | RetTime [min] | Type | Width [min] | Area mAU*s | Height [mAU] | Area %  |
|--------|---------------|------|-------------|------------|--------------|---------|
| 1      | 7.062         | BV   | 0.2855      | 3273.36768 | 170.19456    | 50.9036 |
| 2      | 12.340        | PB   | 1.1817      | 3157.15796 | 40.18075     | 49.0964 |

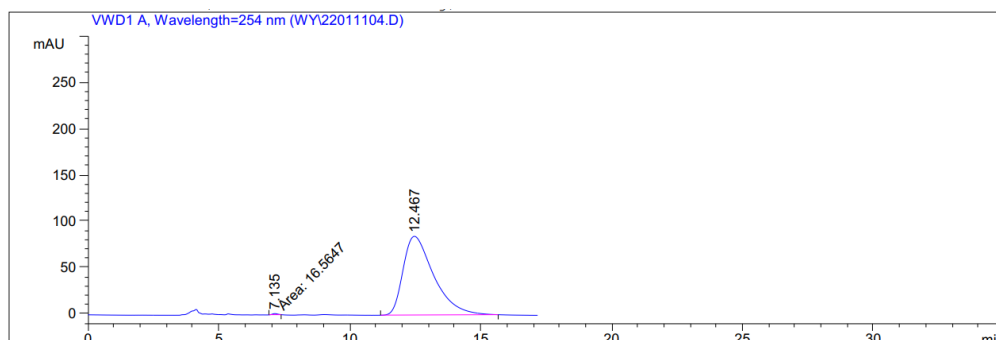

| Peak # | RetTime [min] | Type | Width [min] | Area mAU *s | Height [mAU] | Area %  |
|--------|---------------|------|-------------|-------------|--------------|---------|
| 1      | 7.135         | MM   | 0.2311      | 16.56470    | 1.19450      | 0.2380  |
| 2      | 12.467        | BB   | 1.2099      | 6942.31006  | 85.06021     | 99.7620 |

**(8a*S*,9*R*,10*S*,11a*R*)-1'-Benzyl-9-phenyl-8a,9,11,11a-tetrahydro-8H-spiro[benzo[5,6]naphtho[1',2':7,8]oxocino[4,3-b]pyrrole-10,3'-indoline]-2',8-dione (4aq)**

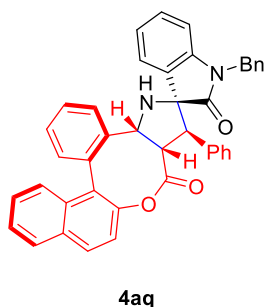

Prepared according to the procedure within 3 days as white solid (86.21 mg, 72% yield, dr > 20:1); mp 214.3 – 214.0 °C; <sup>1</sup>H NMR (400 MHz, CDCl<sub>3</sub>) δ 8.21 (d, *J* = 7.4 Hz, 1H), 8.02 (dd, *J* = 16.2, 8.4 Hz, 2H), 7.83 (d, *J* = 6.9 Hz, 1H), 7.67 (d, *J* = 8.1 Hz, 1H), 7.63 – 7.54 (m, 2H), 7.53 – 7.47 (m, 2H), 7.43 (d, *J* = 8.7 Hz, 1H), 7.37 (d, *J* = 7.0 Hz, 1H), 7.25 – 7.05 (m, 8H), 6.97 (d, *J* = 7.1 Hz, 2H), 6.45 (d, *J* = 6.8 Hz, 2H), 6.37 (d, *J* =

7.2 Hz, 1H), 5.13 (d, *J* = 9.6 Hz, 1H), 4.81 (d, *J* = 15.9 Hz, 1H), 4.51 – 4.34 (m, 2H), 4.18 (d, *J* = 16.1 Hz, 1H), 2.28 (s, 1H); <sup>13</sup>C NMR (101 MHz, CDCl<sub>3</sub>) δ 178.8, 170.7, 146.9, 143.1, 142.2, 134.9, 134.0, 132.5, 132.5, 132.3, 130.7, 130.2, 129.7, 129.5, 129.0, 128.8, 128.6, 128.5, 128.1, 127.8, 127.7, 127.3, 127.2, 126.4, 126.2, 125.8, 124.1, 123.2, 119.9, 109.2, 72.1, 57.7, 54.9, 51.7, 43.3; HRMS (ESI) *m/z* Calcd. for C<sub>41</sub>H<sub>31</sub>N<sub>2</sub>O<sub>3</sub><sup>+</sup> ([M+H]<sup>+</sup>) 599.2329, Found 599.2323; Enantiomeric excess was determined to be 0% (determined by HPLC using chiral AD-H column, hexane/2-propanol = 70/35, λ = 254 nm, 30 °C, 0.8 mL/min, *t*<sub>major</sub> = 7.7 min, *t*<sub>minor</sub> = 6.5 min).

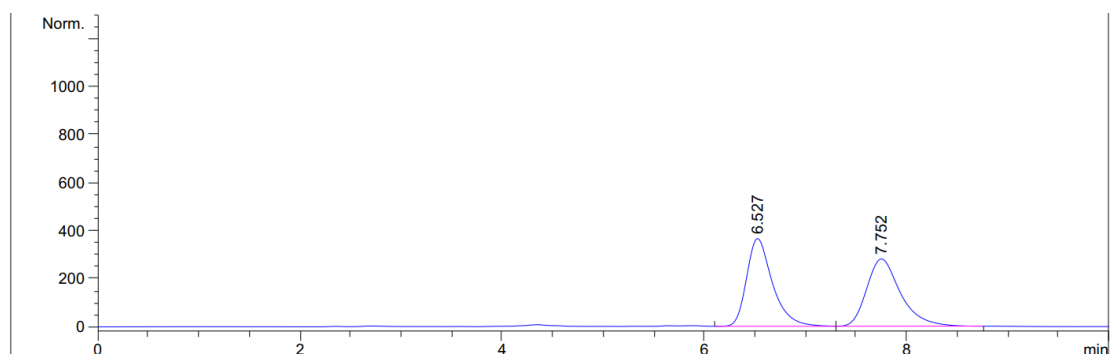

| Peak # | RetTime [min] | Type | Width [min] | Area mAU *s | Height [mAU] | Area %  |
|--------|---------------|------|-------------|-------------|--------------|---------|
| 1      | 6.527         | VV   | 0.2693      | 6514.49902  | 365.12204    | 49.9903 |
| 2      | 7.752         | VB   | 0.3515      | 6517.02637  | 280.08643    | 50.0097 |



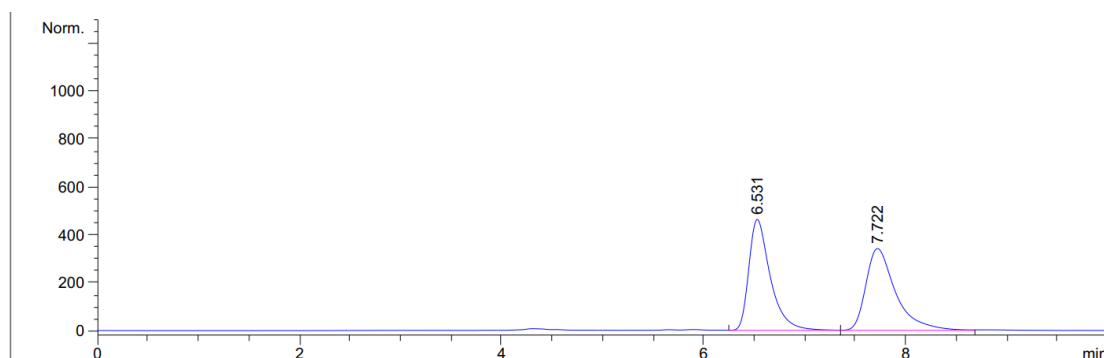

| Peak # | RetTime [min] | Type | Width [min] | Area mAU   | *s | Height [mAU] | Area %  |
|--------|---------------|------|-------------|------------|----|--------------|---------|
| 1      | 6.531         | VV   | 0.2227      | 6864.87549 |    | 462.34409    | 49.4976 |
| 2      | 7.722         | VB   | 0.3065      | 7004.23438 |    | 341.20056    | 50.5024 |

**(4bR,6S,7R,7aS)-1'-Benzyl-2-fluoro-7-phenyl-4b,5,7,7a-tetrahydro-8H-spiro[dibenzo[5,6:7,8]oxocino[4,3-b]pyrrole-6,3'-indoline]-2',8-dione (4ar)**

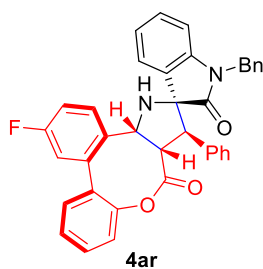

Prepared according to the procedure within 3 days as white solid (104.25 mg, 92% yield, dr > 20:1); mp 175.6 – 176.4 °C;  $[\alpha]_D^{18} = 42.87$  (c 0.49, CH<sub>2</sub>Cl<sub>2</sub>); <sup>1</sup>H NMR (400 MHz, CDCl<sub>3</sub>) δ 8.05 (dd, *J* = 8.4, 5.8 Hz, 1H), 7.83 – 7.74 (m, 1H), 7.58 – 7.52 (m, 1H), 7.48 – 7.38 (m, 2H), 7.29 (d, *J* = 8.0 Hz, 1H), 7.24 – 7.05 (m, 9H), 7.03 – 6.95 (m, 3H), 6.47 (d, *J* = 7.4 Hz, 2H), 6.39 (d, *J* = 7.3 Hz, 1H), 5.20 (d, *J* = 11.1 Hz, 1H), 4.90 (d, *J* = 16.0 Hz, 1H), 4.51 (t, *J* = 11.3 Hz, 1H), 4.38 (d, *J* = 11.4 Hz, 1H), 4.21 (d, *J* = 16.0 Hz, 1H), 2.25 (s, 1H); <sup>13</sup>C NMR (101 MHz, CDCl<sub>3</sub>) δ 178.8, 170.7, 162.3 (d, *J* = 248.5 Hz), 149.5, 143.1, 137.0 (d, *J* = 9.1 Hz), 136.8 (d, *J* = 3.0 Hz), 134.8, 133.9, 133.6, 130.6, 130.0, 129.6, 128.7, 128.6, 128.6, 128.0, 127.8, 127.5 (d, *J* = 9.1 Hz), 127.2, 127.2, 126.4, 124.1, 123.2, 121.4, 116.1 (d, *J* = 22.2 Hz), 115.1 (d, *J* = 21.2 Hz), 109.1, 72.0, 56.9, 54.8, 50.7, 43.3; <sup>19</sup>F NMR (377 MHz, CDCl<sub>3</sub>) δ -114.66; HRMS (ESI) *m/z* Calcd. for C<sub>37</sub>H<sub>28</sub>FN<sub>2</sub>O<sub>3</sub><sup>+</sup> ([M+H]<sup>+</sup>) 567.2078, Found 567.2072; Enantiomeric excess was determined to be 99% (determined by HPLC using chiral AD-H column, hexane/2-propanol = 70/30, λ = 254 nm, 30 °C, 0.8 mL/min, *t*<sub>major</sub> = 9.5 min, *t*<sub>minor</sub> = 6.6 min).

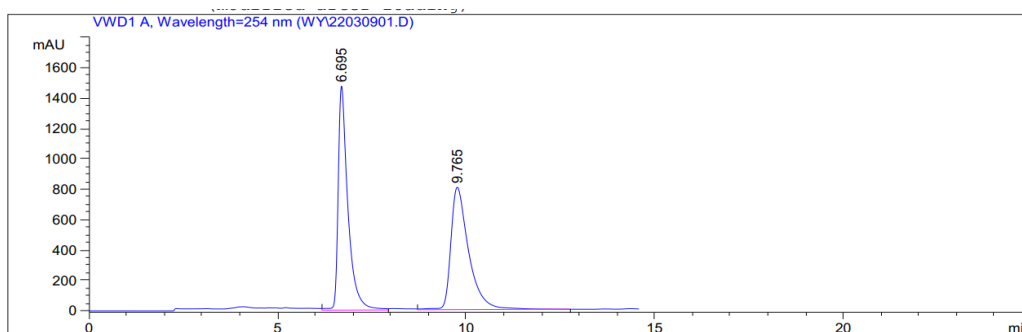

| Peak # | RetTime [min] | Type | Width [min] | Area mAU *s | Height [mAU] | Area %  |
|--------|---------------|------|-------------|-------------|--------------|---------|
| 1      | 6.695         | VV   | 0.2610      | 2.65370e4   | 1474.09424   | 49.8801 |
| 2      | 9.765         | VB   | 0.4895      | 2.66646e4   | 805.60828    | 50.1199 |

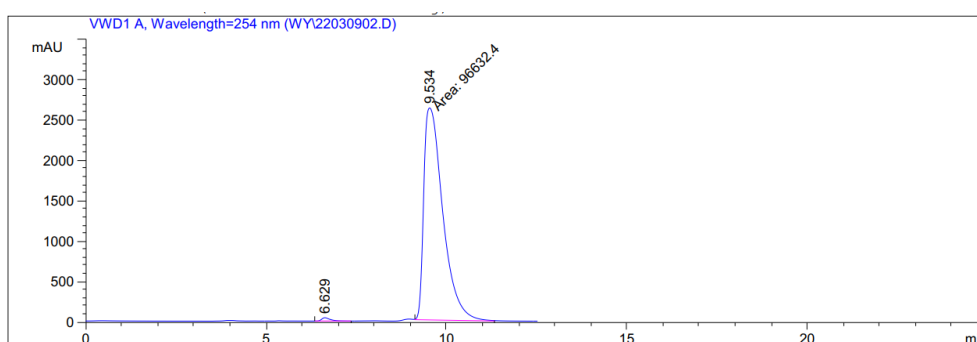

| Peak # | RetTime [min] | Type | Width [min] | Area mAU *s | Height [mAU] | Area %  |
|--------|---------------|------|-------------|-------------|--------------|---------|
| 1      | 6.629         | VB   | 0.2599      | 755.15686   | 42.16830     | 0.7754  |
| 2      | 9.534         | MM   | 0.6125      | 9.66324e4   | 2629.52246   | 99.2246 |

**(4bR,6S,7R,7aS)-1'-Benzyl-3-fluoro-7-phenyl-4b,5,7,7a-tetrahydro-8H-spiro[dibenzo[5,6:7,8]oxocino[4,3-b]pyrrole-6,3'-indoline]-2',8-dione (4as)**

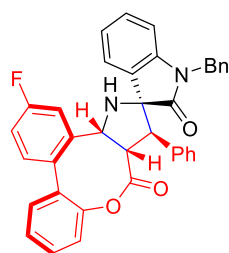

**4as**

Prepared according to the procedure within 4 days as white solid (56.67 mg, 50% yield, dr > 20:1); mp 200.4 – 201.4 °C;  $[\alpha]_D^{18} = 29.38$  (c 0.20, CH<sub>2</sub>Cl<sub>2</sub>); <sup>1</sup>H NMR (400 MHz, CDCl<sub>3</sub>) δ 7.79 (d, *J* = 6.5 Hz, 2H), 7.55 – 7.50 (m, 1H), 7.45 – 7.35 (m, 2H), 7.25 – 7.19 (m, 4H), 7.18 – 7.03 (m, 7H), 6.95 (d, *J* = 7.6 Hz, 2H), 6.45 (d, *J* = 7.3 Hz, 2H), 6.37 (d, *J* = 7.5 Hz, 1H), 5.19 (d, *J* = 10.4 Hz, 1H), 4.87 (d, *J* = 16.0 Hz, 1H), 4.50 (t, *J* = 11.3 Hz, 1H), 4.36 (d, *J* = 11.4 Hz, 1H), 4.20 (d, *J* = 16.0 Hz, 1H), 2.29 (s, 1H); <sup>13</sup>C NMR (101 MHz, CDCl<sub>3</sub>) δ 178.8, 170.5, 163.5 (d, *J* = 247.4 Hz), 149.8, 143.9 (d, *J* = 8.1 Hz), 143.1, 134.8, 133.8, 133.7, 131.0 (d, *J* = 3.0 Hz), 130.7, 130.6, 130.4, 129.6, 128.6, 128.5, 128.5, 128.0, 127.8, 127.2, 127.1, 126.4, 124.2, 123.3, 121.2, 114.8 (d, *J* = 22.2 Hz), 113.1 (d, *J* = 24.2 Hz), 109.3, 72.0, 57.1, 54.8, 50.7, 43.3; <sup>19</sup>F NMR (377 MHz, CDCl<sub>3</sub>) δ -

112.19; HRMS (ESI)  $m/z$  Calcd. for  $C_{37}H_{28}FN_2O_3^+$  ( $[M+H]^+$ ) 567.2078, Found 567.2073; Enantiomeric excess was determined to be 97% (determined by HPLC using chiral AD-H column, hexane/2-propanol = 70/30,  $\lambda$  = 254 nm, 30 °C, 0.8 mL/min,  $t_{major}$  = 12.3 min,  $t_{minor}$  = 6.5 min).

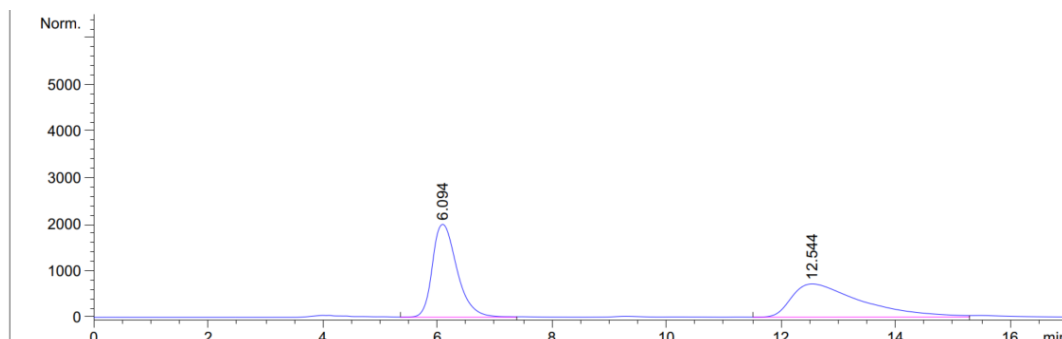

| Peak # | RetTime [min] | Type | Width [min] | Area mAU *s | Height [mAU] | Area %  |
|--------|---------------|------|-------------|-------------|--------------|---------|
| 1      | 6.094         | VV   | 0.4629      | 5.99906e4   | 1995.23303   | 49.5595 |
| 2      | 12.544        | VV   | 1.2532      | 6.10570e4   | 714.55048    | 50.4405 |

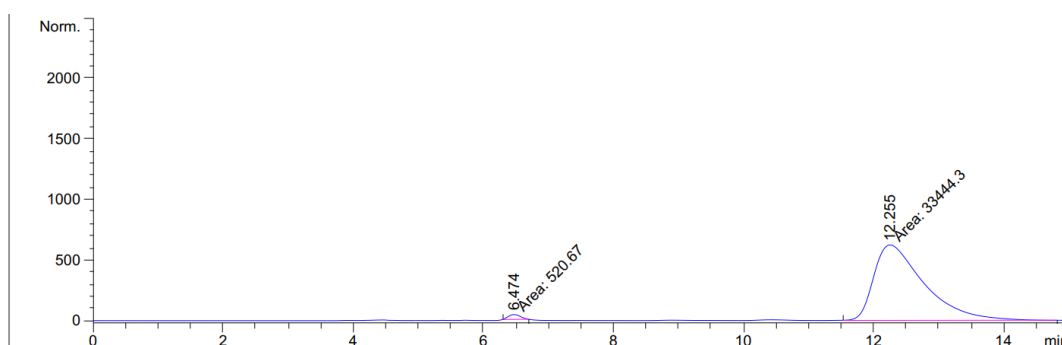

| Peak # | RetTime [min] | Type | Width [min] | Area mAU *s | Height [mAU] | Area %  |
|--------|---------------|------|-------------|-------------|--------------|---------|
| 1      | 6.474         | MM   | 0.2164      | 520.66980   | 40.09602     | 1.5330  |
| 2      | 12.255        | MM   | 0.8946      | 3.34443e4   | 623.06061    | 98.4670 |

**(4bR,6S,7R,7aS)-1'-Methyl-7-phenyl-4b,5,7,7a-tetrahydro-8H-spiro[dibenzo[5,6:7,8]oxocino[4,3-b]pyrrole-6,3'-indoline]-2',8-dione (4ba)**

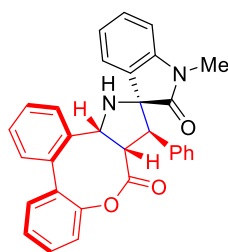

**4ba**

Prepared according to the procedure within 4 days as white solid (83.17 mg, 88% yield, dr > 20:1); mp 278.2 – 279.0 °C;  $[\alpha]_D^{18} = -25.58$  ( $c$  0.09,  $CH_2Cl_2$ );  $^1H$  NMR (400 MHz,  $CDCl_3$ )  $\delta$  8.07 (d,  $J = 7.7$  Hz, 1H), 7.74 (d,  $J = 7.2$  Hz, 1H), 7.54 – 7.47 (m, 2H), 7.45 – 7.36 (m, 3H), 7.29 – 7.26 (m, 1H), 7.25 – 7.17 (m, 3H), 7.13 – 7.02 (m, 3H), 6.90 (d,  $J = 7.3$  Hz, 2H), 6.54 (d,  $J = 7.6$  Hz, 1H),

5.21 (d,  $J = 11.2$  Hz, 1H), 4.38 (t,  $J = 11.3$  Hz, 1H), 4.25 (d,  $J = 11.4$  Hz, 1H), 2.75 (s, 3H), 2.19 (s, 1H);  $^{13}\text{C}$  NMR (101 MHz,  $\text{CDCl}_3$ )  $\delta$  178.9, 170.8, 149.7, 143.7, 141.1, 135.3, 134.7, 134.0, 130.1, 130.1, 129.4, 128.8, 128.8, 128.8, 128.0, 127.9, 127.8, 127.6, 126.9, 125.4, 123.8, 123.1, 121.1, 108.0, 72.2, 57.6, 55.5, 51.0, 25.4; HRMS (ESI)  $m/z$  Calcd. for  $\text{C}_{31}\text{H}_{25}\text{N}_2\text{O}_3^+$  ( $[\text{M}+\text{H}]^+$ ) 473.1860, Found 473.1858; Enantiomeric excess was determined to be 59% (determined by HPLC using chiral AD-H column, hexane/2-propanol = 70/30,  $\lambda = 254$  nm, 30 °C, 0.8 mL/min,  $t_{\text{major}} = 27.7$  min,  $t_{\text{minor}} = 9.5$  min).

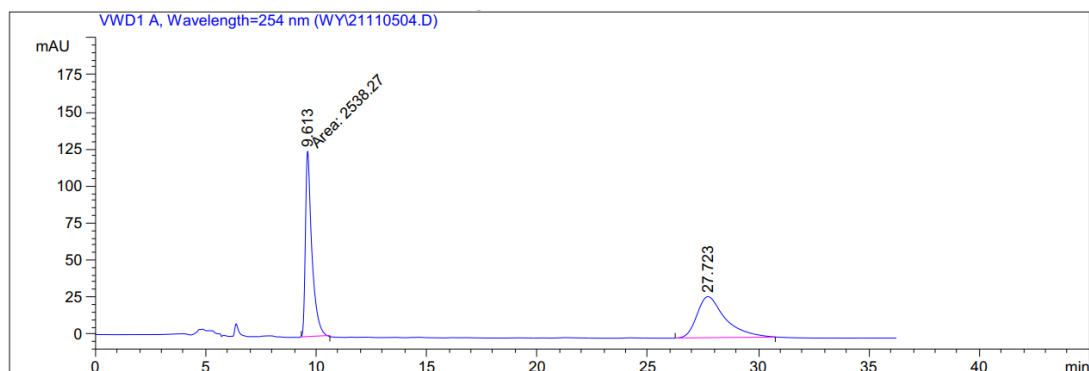

| Peak # | RetTime [min] | Type | Width [min] | Area mAU *s | Height [mAU] | Area %  |
|--------|---------------|------|-------------|-------------|--------------|---------|
| 1      | 9.613         | MM   | 0.3384      | 2538.26514  | 125.02699    | 50.6194 |
| 2      | 27.723        | BB   | 1.2559      | 2476.14844  | 27.72734     | 49.3806 |

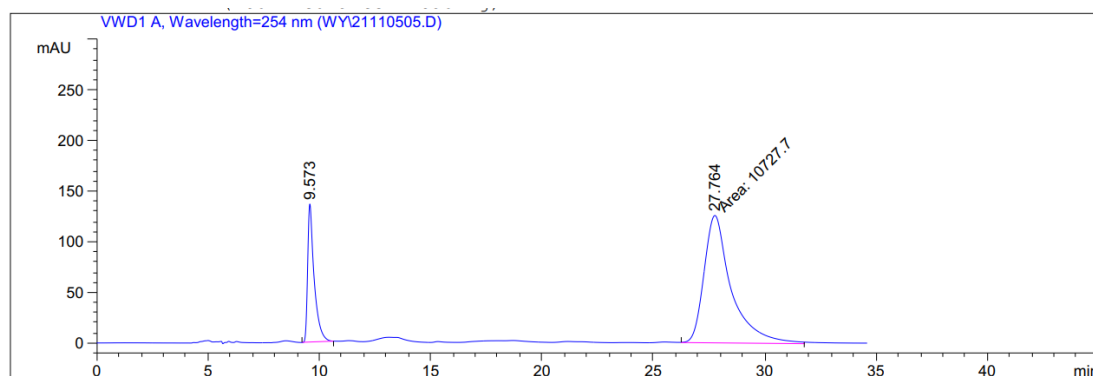

| Peak # | RetTime [min] | Type | Width [min] | Area mAU *s | Height [mAU] | Area %  |
|--------|---------------|------|-------------|-------------|--------------|---------|
| 1      | 9.573         | VB   | 0.2913      | 2777.50171  | 136.50038    | 20.5662 |
| 2      | 27.764        | MM   | 1.4196      | 1.07277e4   | 125.94410    | 79.4338 |

**(4bR,6S,7R,7aS)-1'-Benzyl-5'-methyl-7-phenyl-4b,5,7,7a-tetrahydro-8H-spiro[dibenzo[5,6:7,8]oxocino[4,3-b]pyrrole-6,3'-indoline]-2',8-dione (4ca)**

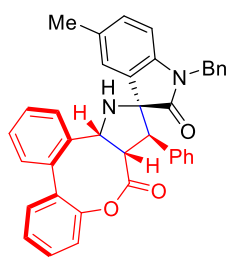

**4ca**

Prepared according to the procedure within 7 days as white solid (78.77 mg, 70% yield, dr > 20:1); mp 187.8 – 188.5 °C;  $[\alpha]_D^{18} = 52.47$  (c 0.32, CH<sub>2</sub>Cl<sub>2</sub>); <sup>1</sup>H NMR (400 MHz, CDCl<sub>3</sub>) δ 8.07 (d, *J* = 7.6 Hz, 1H), 7.60 (s, 1H), 7.54 – 7.47 (m, 2H), 7.44 – 7.35 (m, 3H), 7.25 – 7.18 (m, 3H), 7.14 – 7.02 (m, 5H), 7.00 – 6.91 (m, 3H), 6.43 (d, *J* = 7.3 Hz, 2H), 6.24 (d, *J* = 7.9 Hz, 1H), 5.23 (d, *J* = 11.2 Hz, 1H), 4.86 (d, *J* = 16.0 Hz, 1H), 4.49 (t, *J* = 11.3 Hz, 1H), 4.36 (d, *J* = 11.3 Hz, 1H), 4.16 (d, *J* = 16.0 Hz, 1H), 2.43 (s, 3H), 2.22 (s, 1H); <sup>13</sup>C NMR (101 MHz, CDCl<sub>3</sub>) δ 178.8, 171.0, 149.7, 141.0, 140.7, 135.3, 135.0, 134.8, 134.2, 132.9, 130.2, 130.1, 129.8, 128.9, 128.8, 128.8, 128.6, 128.5, 128.1, 128.0, 127.7, 127.1, 127.0, 126.4, 125.5, 124.8, 121.1, 109.0, 72.1, 57.5, 54.9, 50.9, 43.3, 21.2; HRMS (ESI) *m/z* Calcd. for C<sub>38</sub>H<sub>31</sub>N<sub>2</sub>O<sub>3</sub><sup>+</sup> ([M+H]<sup>+</sup>) 563.2329, Found 563.2323; Enantiomeric excess was determined to be 97% (determined by HPLC using chiral AD-H column, hexane/2-propanol = 70/30, λ = 254 nm, 30 °C, 0.8 mL/min, *t*<sub>major</sub> = 11.6 min, *t*<sub>minor</sub> = 9.8 min).

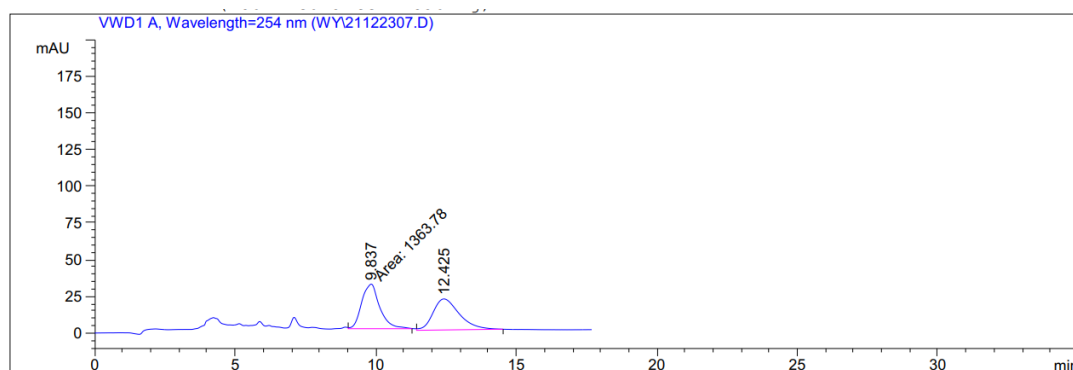

| Peak # | RetTime [min] | Type | Width [min] | Area mAU *s | Height [mAU] | Area %  |
|--------|---------------|------|-------------|-------------|--------------|---------|
| 1      | 9.837         | MM   | 0.7477      | 1363.77551  | 30.39775     | 49.4184 |
| 2      | 12.425        | BB   | 0.9580      | 1395.87390  | 21.26602     | 50.5816 |

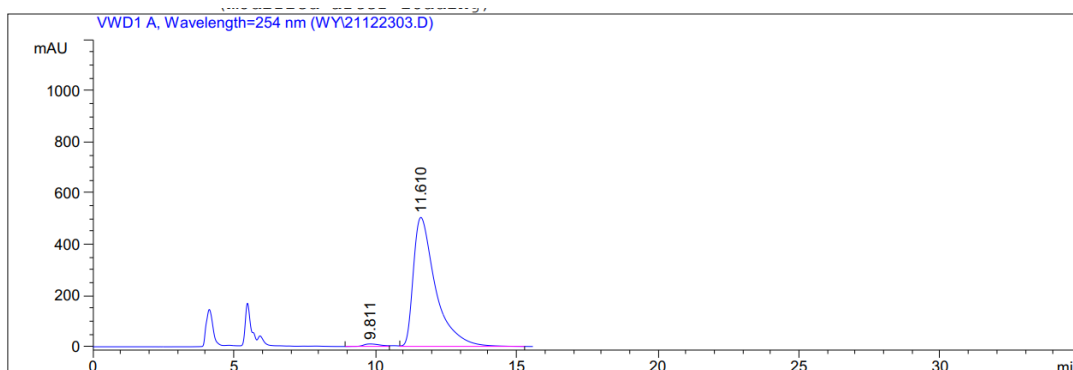

| Peak # | RetTime [min] | Type | Width [min] | Area mAU *s | Height [mAU] | Area %  |
|--------|---------------|------|-------------|-------------|--------------|---------|
| 1      | 9.811         | VV   | 0.6477      | 421.23514   | 9.93094      | 1.5083  |
| 2      | 11.610        | VB   | 0.8112      | 2.75066e4   | 504.15973    | 98.4917 |

**(4bR,6S,7R,7aS)-1'-Benzyl-5'-fluoro-7-phenyl-4b,5,7,7a-tetrahydro-8H-spiro[dibenzo[5,6:7,8]oxocino[4,3-b]pyrrole-6,3'-indoline]-2',8-dione (4da)**

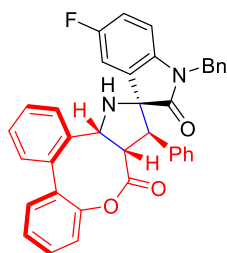

**4da**

Prepared according to the procedure within 7 days as white solid (58.93 mg, 52% yield, dr > 20:1); mp 196.4 – 197.5 °C;  $[\alpha]_D^{18} = 30.06$  (c 0.17, CH<sub>2</sub>Cl<sub>2</sub>); <sup>1</sup>H NMR (400 MHz, CDCl<sub>3</sub>) δ 8.04 (d, *J* = 7.7 Hz, 1H), 7.54 – 7.49 (m, 3H), 7.44 – 7.31 (m, 3H), 7.26 – 7.20 (m, 3H), 7.16 – 7.04 (m, 5H), 6.98 (d, *J* = 7.5 Hz, 2H), 6.87 – 6.80 (m, 1H), 6.43 (d, *J* = 7.4 Hz, 2H), 6.26 (dd, *J* = 8.4, 3.9 Hz, 1H), 5.22 (d, *J* = 11.2 Hz, 1H), 4.87 (d, *J* = 16.0 Hz, 1H), 4.48 (t, *J* = 11.3 Hz, 1H), 4.33 (d, *J* = 11.4 Hz, 1H), 4.17 (d, *J* = 16.0 Hz, 1H), 2.27 (s, 1H); <sup>13</sup>C NMR (101 MHz, CDCl<sub>3</sub>) δ 178.7, 170.6, 159.7 (d, *J* = 243.4 Hz), 149.7, 140.7, 138.9, 135.3, 134.7, 134.5, 133.7, 130.8, 130.7, 130.2, 130.1, 128.9, 128.9, 128.7, 128.6, 128.1, 127.9, 127.3, 127.0, 126.4, 125.4, 121.2, 115.9 (d, *J* = 24.2 Hz), 112.1 (d, *J* = 25.3 Hz), 110.0 (d, *J* = 7.1 Hz), 72.3, 57.5, 55.2, 50.8, 43.4; <sup>19</sup>F NMR (377 MHz, CDCl<sub>3</sub>) δ -119.20; HRMS (ESI) *m/z* Calcd. for C<sub>37</sub>H<sub>28</sub>FN<sub>2</sub>O<sub>3</sub><sup>+</sup> ([M+H]<sup>+</sup>) 567.2078, Found 567.2074; Enantiomeric excess was determined to be >99% (determined by HPLC using chiral AD-H column, hexane/2-propanol = 70/30, λ = 254 nm, 30 °C, 0.8 mL/min, *t*<sub>major</sub> = 12.1 min, *t*<sub>minor</sub> = 6.0 min).

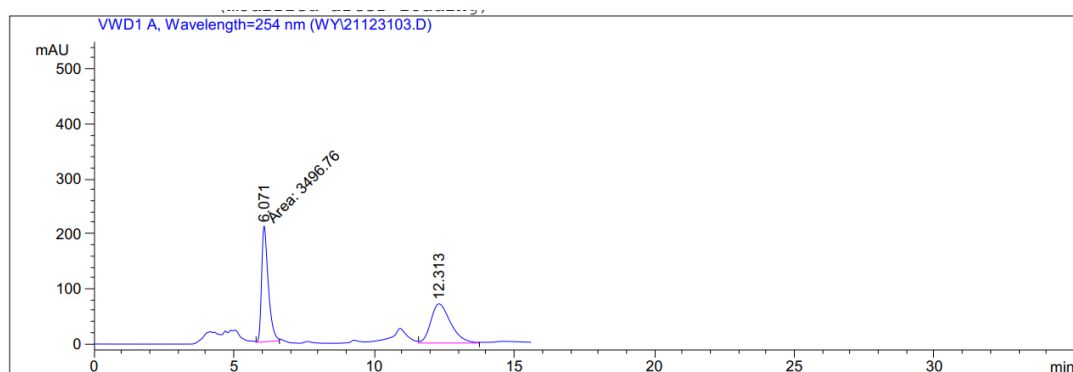

| Peak # | RetTime [min] | Type | Width [min] | Area mAU *s | Height [mAU] | Area %  |
|--------|---------------|------|-------------|-------------|--------------|---------|
| 1      | 6.071         | MM   | 0.2765      | 3496.76050  | 210.76863    | 49.5076 |
| 2      | 12.313        | VB   | 0.7572      | 3566.31616  | 71.78394     | 50.4924 |

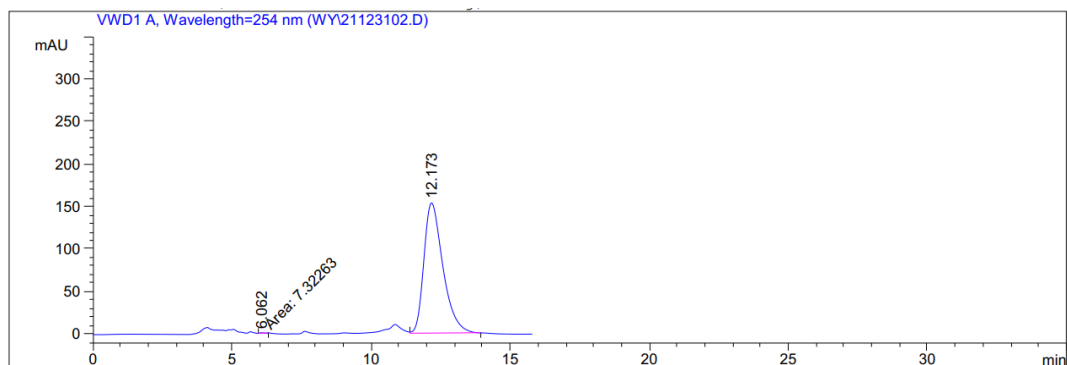

| Peak # | RetTime [min] | Type | Width [min] | Area mAU *s | Height [mAU] | Area %  |
|--------|---------------|------|-------------|-------------|--------------|---------|
| 1      | 6.062         | MM   | 0.1633      | 7.32263     | 7.47340e-1   | 0.1003  |
| 2      | 12.173        | VB   | 0.7250      | 7293.05566  | 153.41624    | 99.8997 |

**(3bR,5S,6R,6aS)-1'-Benzyl-6-phenyl-3b,4,6,6a-tetrahydro-7H-spiro[benzo[b]dipyrrolo[1,2-d':2',3'-f][1,4]oxazocine-5,3'-indoline]-2',7-dione (6aa)**

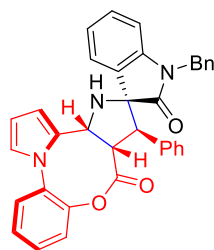

6aa

Prepared according to the procedure within 2.5 days as white solid (90.3 mg, 84% yield, dr > 20:1). mp 173.2 – 174.0 °C;  $[\alpha]_D^{18} = 67.67$  (*c* 0.23, CH<sub>2</sub>Cl<sub>2</sub>); <sup>1</sup>H NMR (400 MHz, CDCl<sub>3</sub>) δ 7.75 – 7.70 (m, 1H), 7.55 – 7.48 (m, 2H), 7.46 – 7.39 (m, 1H), 7.30 (d, *J* = 8.1 Hz, 1H), 7.23 – 7.03 (m, 8H), 6.97 (d, *J* = 7.6 Hz, 2H), 6.79 – 6.75 (m, 1H), 6.45 (d, *J* = 7.4 Hz, 3H), 6.36 (d, *J* = 7.0 Hz, 1H), 6.34 – 6.29 (m, 1H), 5.35 (d, *J* = 10.6 Hz, 1H), 4.88 (d, *J* = 16.0 Hz, 1H), 4.47 (d, *J* = 10.4 Hz, 1H), 4.28 (t, *J* = 10.5 Hz, 1H), 4.19 (d, *J* = 16.0 Hz, 1H), 2.53 (s, 1H); <sup>13</sup>C NMR (101 MHz, CDCl<sub>3</sub>) δ 178.3, 169.8, 147.5, 143.1, 134.9, 134.6, 134.2, 133.0, 130.3, 129.6, 128.6, 128.5, 128.2, 128.2, 128.1, 127.7, 127.4, 127.2, 126.4, 123.9, 123.2, 122.5, 122.0, 109.8, 109.3, 107.0, 72.1, 55.8, 54.6, 50.0, 43.3; HRMS (ESI) *m/z* Calcd. for C<sub>35</sub>H<sub>28</sub>N<sub>3</sub>O<sub>3</sub><sup>+</sup> ([M+H]<sup>+</sup>) 538.2125, Found 538.2125; Enantiomeric excess was determined to be 93% (determined by HPLC using chiral AD-H column, hexane/2-propanol = 70/30, λ = 254 nm, 30 °C, 0.8 mL/min, *t*<sub>major</sub> = 14.7 min, *t*<sub>minor</sub> = 7.8 min).

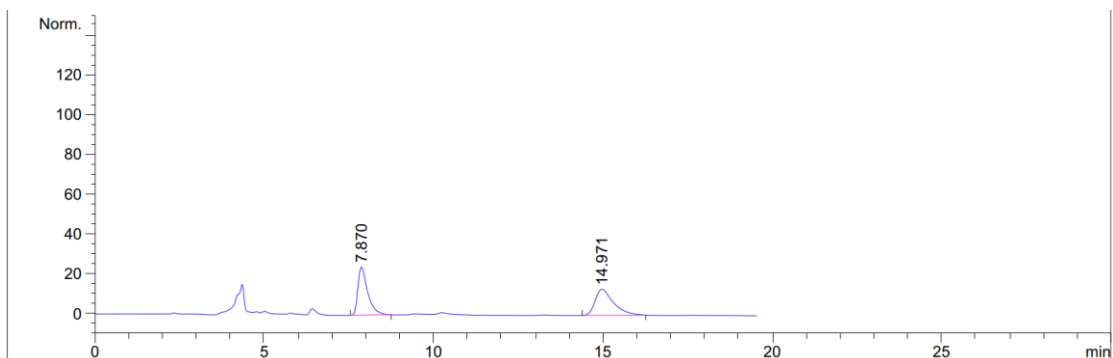

| Peak # | RetTime [min] | Type | Width [min] | Area mAU * s | Height [mAU] | Area %  |
|--------|---------------|------|-------------|--------------|--------------|---------|
| 1      | 7.870         | PB   | 0.3002      | 488.51675    | 24.14030     | 49.8185 |
| 2      | 14.971        | BB   | 0.5544      | 492.07629    | 13.10981     | 50.1815 |

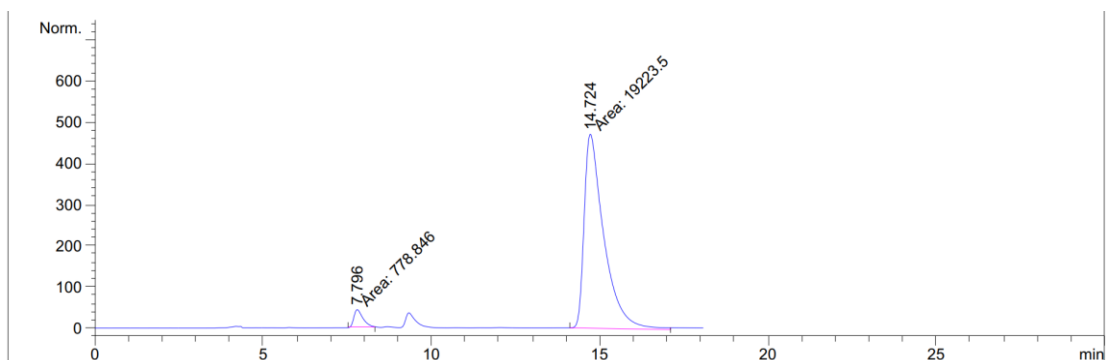

| Peak # | RetTime [min] | Type | Width [min] | Area mAU * s | Height [mAU] | Area %  |
|--------|---------------|------|-------------|--------------|--------------|---------|
| 1      | 7.796         | MM   | 0.3083      | 778.84552    | 42.10896     | 3.8938  |
| 2      | 14.724        | MM   | 0.6801      | 1.92235e4    | 471.09012    | 96.1062 |

**(3bR,5S,6R,6aS)-1'-Benzyl-6-(2-methoxyphenyl)-3b,4,6,6a-tetrahydro-7H-spiro[benzo[b]dipyrrolo[1,2-d:2',3'-f][1,4]oxazocine-5,3'-indoline]-2',7-dione (6ab)**

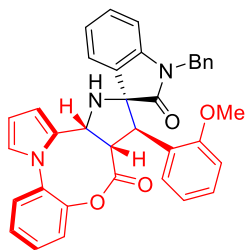

**6ab**

Prepared according to the procedure within 3 days as white solid (96.5 mg, 85% yield, dr > 20:1). mp 173.9 – 174.8 °C;  $[\alpha]_D^{18} = 50.59$  (c 0.34, CH<sub>2</sub>Cl<sub>2</sub>); <sup>1</sup>H NMR (400 MHz, CDCl<sub>3</sub>) δ 7.75 (d, *J* = 6.9 Hz, 1H), 7.54 – 7.46 (m, 2H), 7.45 – 7.38 (m, 1H), 7.29 – 7.21 (m, 2H), 7.19 – 7.03 (m, 6H), 6.82 – 6.74 (m, 2H), 6.62 (d, *J* = 8.1 Hz, 1H), 6.50 (d, *J* = 7.3 Hz, 2H), 6.45 (d, *J* = 1.3 Hz, 1H), 6.35 – 6.28 (m, 2H), 5.35 (d, *J* = 10.5 Hz, 1H), 5.23 (d, *J* = 10.3 Hz, 1H), 4.93 (d, *J* = 16.0 Hz, 1H), 4.27 – 4.13 (m, 2H), 3.28 (s, 3H), 2.43 (s, 1H); <sup>13</sup>C NMR (101 MHz, CDCl<sub>3</sub>) δ 178.5, 170.0, 158.3, 147.6, 142.8, 135.1, 134.7, 133.0, 130.2, 129.0, 128.6, 128.5, 128.4, 128.1, 127.8, 127.3, 127.1, 126.5, 125.1,



123.3, 122.5, 122.4, 121.9, 120.6, 111.0, 109.7, 108.8, 106.9, 72.0, 55.1, 55.0, 50.9, 47.1, 43.2; HRMS (ESI)  $m/z$  Calcd. for  $C_{36}H_{30}N_3O_4^+$  ( $[M+H]^+$ ) 568.2231, Found 568.2224; Enantiomeric excess was determined to be 95% (determined by HPLC using chiral AD-H column, hexane/2-propanol = 70/30,  $\lambda = 254$  nm, 30 °C, 0.8 mL/min,  $t_{major} = 12.4$  min,  $t_{minor} = 8.8$  min).

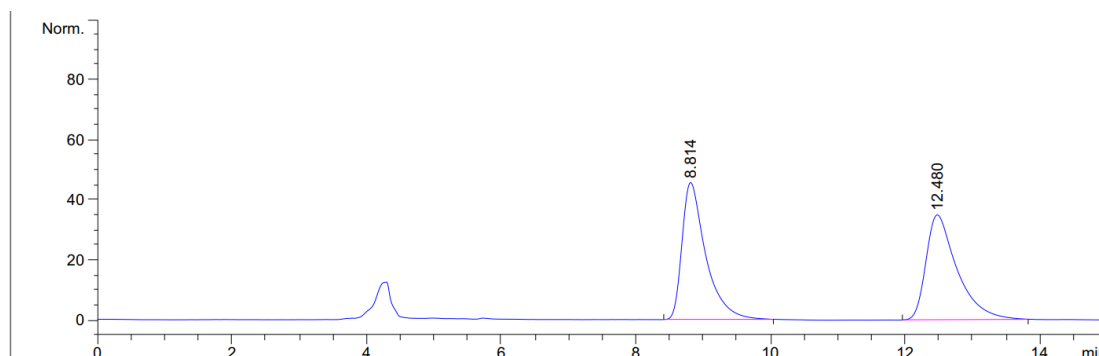

| Peak # | RetTime [min] | Type | Width [min] | Area mAU *s | Height [mAU] | Area %  |
|--------|---------------|------|-------------|-------------|--------------|---------|
| 1      | 8.814         | BB   | 0.3617      | 1116.49170  | 45.54860     | 49.9016 |
| 2      | 12.480        | BB   | 0.4708      | 1120.89551  | 34.89931     | 50.0984 |

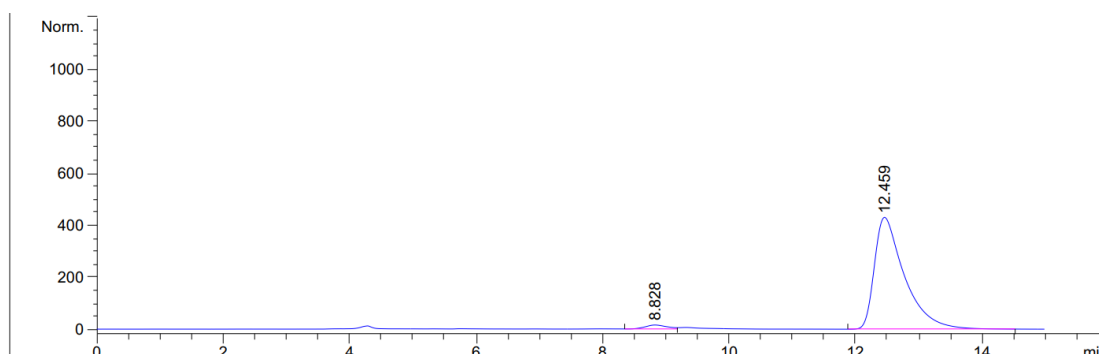

| Peak # | RetTime [min] | Type | Width [min] | Area mAU *s | Height [mAU] | Area %  |
|--------|---------------|------|-------------|-------------|--------------|---------|
| 1      | 8.828         | VV   | 0.3646      | 385.85458   | 15.58014     | 2.6401  |
| 2      | 12.459        | PB   | 0.4819      | 1.42291e4   | 430.24365    | 97.3599 |

**(3bR,5S,6R,6aS)-1'-Benzyl-6-(2-chlorophenyl)-3b,4,6,6a-tetrahydro-7H-spiro[benzo[b]dipyrrolo[1,2-d:2',3'-f][1,4]oxazocine-5,3'-indoline]-2',7-dione (6ac)**

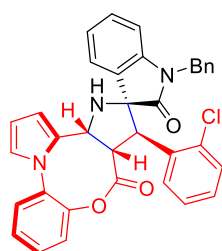

6ac

Prepared according to the procedure within 4 days as white solid (91.5 mg, 80% yield, dr > 20:1). mp 181.8 – 182.4 °C;  $[\alpha]_D^{18} = 23.76$  (c 0.36,  $CH_2Cl_2$ );  $^1H$  NMR (600 MHz,  $CDCl_3$ )  $\delta$  7.82 – 7.76 (m, 1H), 7.52 – 7.46 (m, 2H), 7.45 – 7.38 (m, 2H), 7.24 – 7.22 (m, 1H), 7.18 (dd,  $J = 7.9, 1.0$  Hz, 1H), 7.16 – 7.02 (m, 7H), 6.79 –

6.74 (m, 1H), 6.62 (d,  $J = 7.5$  Hz, 2H), 6.49 – 6.44 (m, 1H), 6.39 (dd,  $J = 6.1, 2.4$  Hz, 1H), 6.34 – 6.30 (m, 1H), 5.38 (d,  $J = 10.6$  Hz, 1H), 5.31 (d,  $J = 10.2$  Hz, 1H), 4.92 (d,  $J = 15.9$  Hz, 1H), 4.28 (d,  $J = 15.9$  Hz, 1H), 4.11 (t,  $J = 10.4$  Hz, 1H), 2.45 (s, 1H);  $^{13}\text{C}$  NMR (151 MHz,  $\text{CDCl}_3$ )  $\delta$  178.4, 169.6, 147.4, 142.8, 136.0, 135.0, 134.3, 133.0, 132.6, 130.3, 130.0, 129.7, 129.0, 128.6, 128.6, 128.1, 127.4, 127.3, 127.0, 126.9, 126.6, 125.7, 122.9, 122.4, 122.1, 109.8, 109.0, 107.1, 72.2, 55.0, 52.7, 50.1, 43.3; HRMS (ESI)  $m/z$  Calcd. for  $\text{C}_{35}\text{H}_{27}\text{ClN}_3\text{O}_3^+$  ( $[\text{M}+\text{H}]^+$ ) 572.1735, Found 572.1739; Enantiomeric excess was determined to be 91% (determined by HPLC using chiral AD-H column, hexane/2-propanol = 70/30,  $\lambda = 254$  nm, 30 °C, 0.8 mL/min,  $t_{\text{major}} = 13.4$  min,  $t_{\text{minor}} = 9.1$  min).

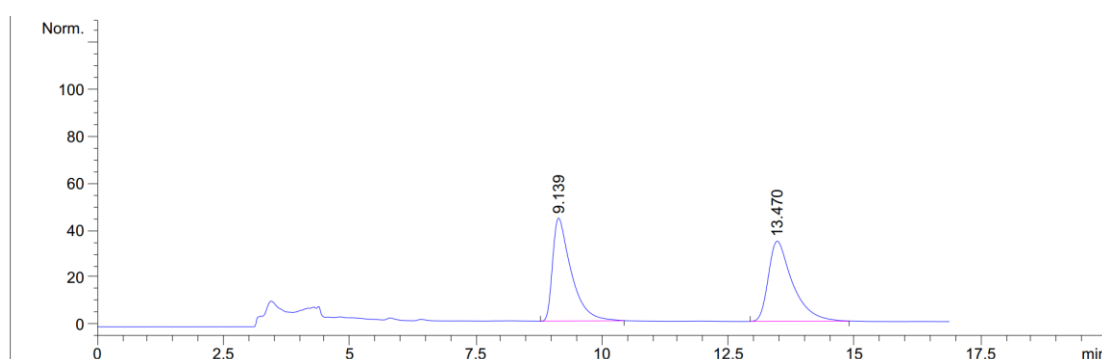

| Peak # | RetTime [min] | Type | Width [min] | Area mAU *s | Height [mAU] | Area %  |
|--------|---------------|------|-------------|-------------|--------------|---------|
| 1      | 9.139         | PB   | 0.3704      | 1126.14136  | 43.93664     | 49.6355 |
| 2      | 13.470        | BB   | 0.4900      | 1142.68286  | 34.22232     | 50.3645 |

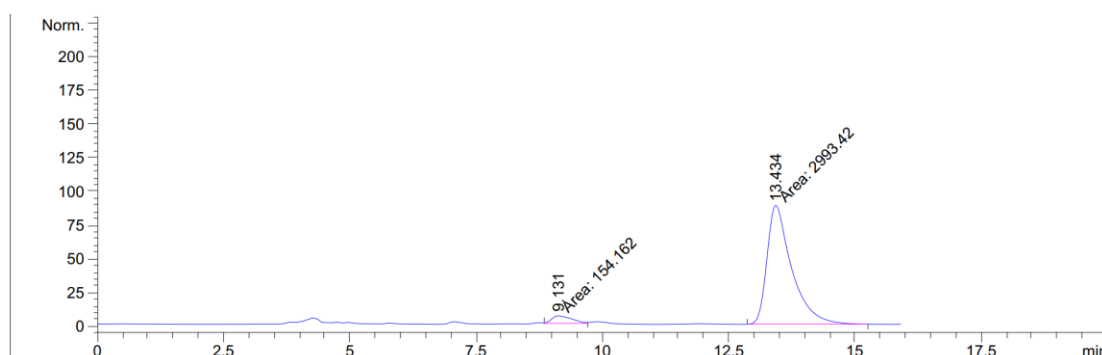

| Peak # | RetTime [min] | Type | Width [min] | Area mAU *s | Height [mAU] | Area %  |
|--------|---------------|------|-------------|-------------|--------------|---------|
| 1      | 9.131         | MM   | 0.4553      | 154.16229   | 5.64379      | 4.8978  |
| 2      | 13.434        | MM   | 0.5664      | 2993.42261  | 88.07903     | 95.1022 |

**(3bR,5S,6R,6aS)-1'-Benzyl-6-(m-tolyl)-3b,4,6,6a-tetrahydro-7H-spiro[benzo[b]dipyrrolo[1,2-d:2',3'-f][1,4]oxazocine-5,3'-indoline]-2',7-dione (6ad)**

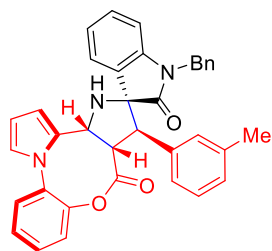

**6ad**

Prepared according to the procedure within 3 days as white solid (93.8 mg, 85% yield, dr > 20:1). mp 169.5 – 170.0 °C;  $[\alpha]_D^{18} = 84.79$  (c 0.26, CH<sub>2</sub>Cl<sub>2</sub>); <sup>1</sup>H NMR (600 MHz, CDCl<sub>3</sub>) δ 7.71 (dd, *J* = 7.2, 1.0 Hz, 1H), 7.54 – 7.48 (m, 2H), 7.45 – 7.40 (m, 1H), 7.30 (dd, *J* = 8.0, 1.1 Hz, 1H), 7.18 – 7.11 (m, 3H), 7.08 – 7.03 (m, 2H), 7.03 – 6.97 (m, 2H), 6.79 – 6.72 (m, 3H), 6.47 – 6.43 (m, 3H), 6.36 (d, *J* = 7.3 Hz, 1H), 6.32 – 6.29 (m,

1H), 5.33 (d, *J* = 10.7 Hz, 1H), 4.93 (d, *J* = 16.0 Hz, 1H), 4.43 (d, *J* = 10.4 Hz, 1H), 4.26 (t, *J* = 10.5 Hz, 1H), 4.18 (d, *J* = 16.0 Hz, 1H), 2.43 (s, 1H), 2.09 (s, 3H); <sup>13</sup>C NMR (151 MHz, CDCl<sub>3</sub>) δ 178.4, 169.9, 147.5, 143.1, 138.0, 135.0, 134.7, 134.1, 133.0, 130.3, 129.6, 128.9, 128.6, 128.5, 128.4, 128.3, 128.0, 127.4, 127.2, 126.3, 125.2, 123.9, 123.2, 122.5, 121.9, 109.7, 109.2, 106.9, 72.1, 55.7, 54.6, 49.9, 43.3, 21.4; HRMS (ESI) *m/z* Calcd. for C<sub>36</sub>H<sub>30</sub>N<sub>3</sub>O<sub>3</sub><sup>+</sup> ([M+H]<sup>+</sup>) 552.2282, Found 552.2284; Enantiomeric excess was determined to be 91% (determined by HPLC using chiral AD-H column, hexane/2-propanol = 70/30, λ = 254 nm, 30 °C, 0.8 mL/min, *t*<sub>major</sub> = 9.9 min, *t*<sub>minor</sub> = 7.1 min).

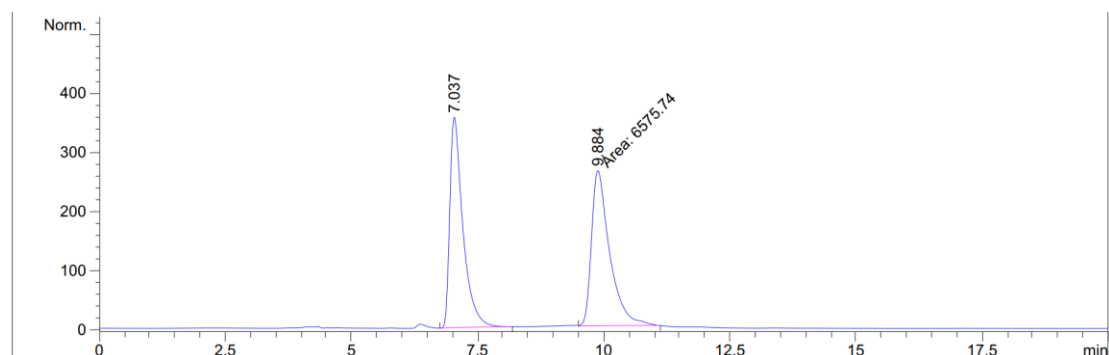

| Peak # | RetTime [min] | Type | Width [min] | Area mAU   | Area *s   | Height [mAU] | Area % |
|--------|---------------|------|-------------|------------|-----------|--------------|--------|
| 1      | 7.037         | VB   | 0.2662      | 6434.84619 | 356.01816 | 49.4585      |        |
| 2      | 9.884         | MM   | 0.4175      | 6575.73926 | 262.52737 | 50.5415      |        |

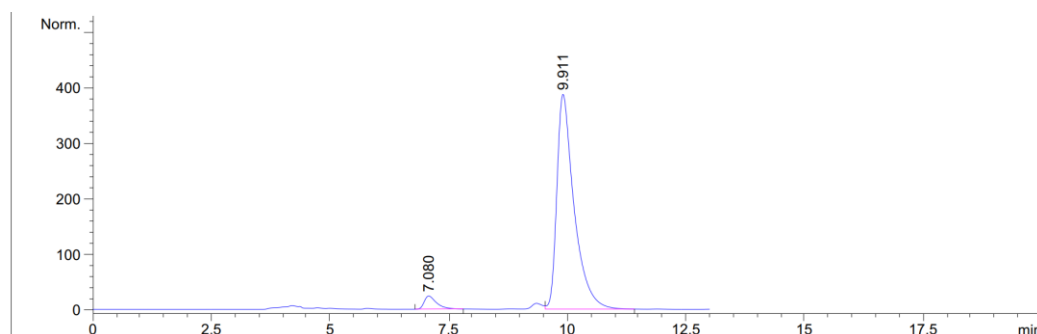

| Peak # | RetTime [min] | Type | Width [min] | Area mAU *s | Height [mAU] | Area %  |
|--------|---------------|------|-------------|-------------|--------------|---------|
| 1      | 7.080         | PB   | 0.2682      | 427.45135   | 23.74780     | 4.1983  |
| 2      | 9.911         | VB   | 0.3687      | 9753.98047  | 386.48398    | 95.8017 |

**(3bR,5S,6R,6aS)-1'-Benzyl-6-(3-chlorophenyl)-3b,4,6,6a-tetrahydro-7H-spiro[benzo[b]dipyrrolo[1,2-d:2',3'-f][1,4]oxazocine-5,3'-indoline]-2',7-dione (6ae)**

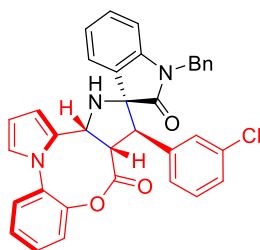

6ae

Prepared according to the procedure within 4 days as white solid (91.5 mg, 80% yield, dr > 20:1). mp 178.1 – 179.0 °C;  $[\alpha]_D^{18} = 78.16$  (*c* 0.59, CH<sub>2</sub>Cl<sub>2</sub>); <sup>1</sup>H NMR (600 MHz, CDCl<sub>3</sub>) δ 7.73 – 7.69 (m, 1H), 7.58 – 7.49 (m, 2H), 7.48 – 7.42 (m, 1H), 7.34 (d, *J* = 8.0 Hz, 1H), 7.22 – 7.09 (m, 6H), 7.03 – 6.98 (m, 2H), 6.86 (d, *J* = 7.7 Hz, 1H), 6.81 – 6.76 (m, 1H), 6.61 (d, *J* = 7.4 Hz, 2H), 6.48 – 6.42 (m, 2H), 6.36 – 6.30 (m, 1H), 5.32 (d,

*J* = 10.6 Hz, 1H), 4.91 (d, *J* = 15.9 Hz, 1H), 4.42 (d, *J* = 10.5 Hz, 1H), 4.30 – 4.20 (m, 2H), 2.48 (s, 1H); <sup>13</sup>C NMR (151 MHz, CDCl<sub>3</sub>) δ 178.1, 169.6, 147.3, 143.1, 136.4, 134.9, 134.5, 134.3, 132.9, 130.4, 129.9, 129.7, 128.7, 128.2, 128.0, 127.7, 127.5, 127.4, 126.6, 126.5, 123.9, 123.4, 122.5, 122.0, 109.8, 109.4, 107.1, 71.8, 55.2, 54.4, 50.0, 43.4; HRMS (ESI) *m/z* Calcd. for C<sub>35</sub>H<sub>27</sub>ClN<sub>3</sub>O<sub>3</sub><sup>+</sup> ([M+H]<sup>+</sup>) 572.1735, Found 572.1736; Enantiomeric excess was determined to be 87% (determined by HPLC using chiral AD-H column, hexane/2-propanol = 70/30, λ = 254 nm, 30 °C, 0.8 mL/min, *t*<sub>major</sub> = 11.2 min, *t*<sub>minor</sub> = 7.7 min).

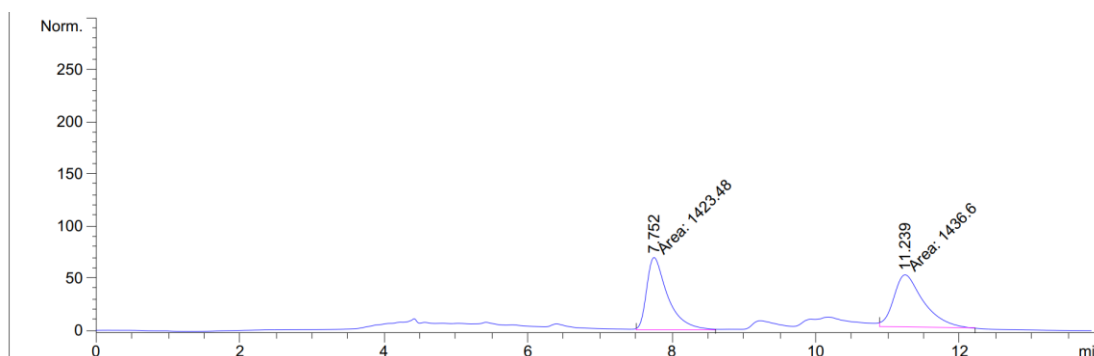

| Peak # | RetTime [min] | Type | Width [min] | Area mAU *s | Height [mAU] | Area %  |
|--------|---------------|------|-------------|-------------|--------------|---------|
| 1      | 7.752         | MM   | 0.3410      | 1423.47876  | 69.57114     | 49.7706 |
| 2      | 11.239        | MM   | 0.4790      | 1436.60303  | 49.98846     | 50.2294 |

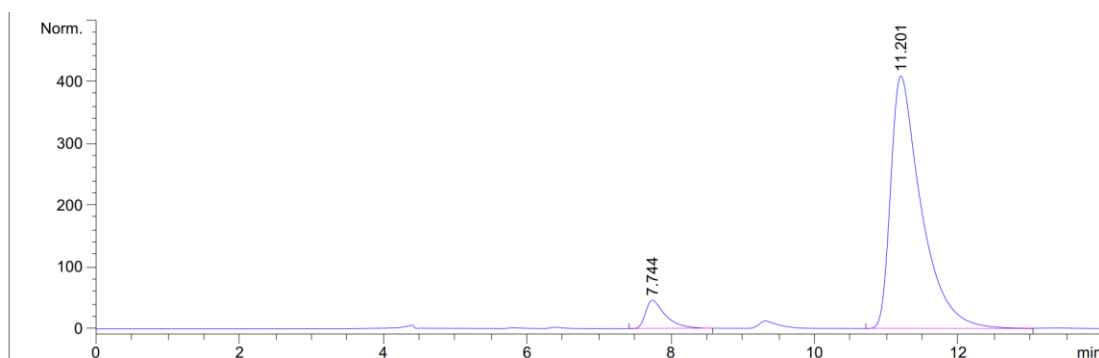

| Peak # | RetTime [min] | Type | Width [min] | Area mAU * s | Height [mAU] | Area %  |
|--------|---------------|------|-------------|--------------|--------------|---------|
| 1      | 7.744         | PB   | 0.2811      | 879.54340    | 45.73726     | 6.7648  |
| 2      | 11.201        | PB   | 0.4304      | 1.21223e4    | 408.82529    | 93.2352 |

**(3bR,5S,6R,6aS)-1'-Benzyl-6-(3-bromophenyl)-3b,4,6,6a-tetrahydro-7H-spiro[benzo[b]dipyrrolo[1,2-d':3'-f][1,4]oxazocine-5,3'-indoline]-2',7-dione (6af)**

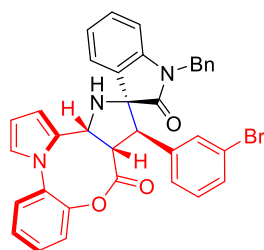

**6af**

Prepared according to the procedure within 3 days as white solid (106.0 mg, 86% yield, dr > 20:1). mp 177.7 – 178.5 °C;

$[\alpha]_D^{18} = 77.03$  (*c* 0.21, CH<sub>2</sub>Cl<sub>2</sub>); <sup>1</sup>H NMR (400 MHz, CDCl<sub>3</sub>)  $\delta$

7.75 – 7.66 (m, 1H), 7.59 – 7.40 (m, 3H), 7.38 – 7.28 (m, 2H),

7.23 – 7.07 (m, 6H), 7.00 – 6.85 (m, 2H), 6.82 – 6.75 (m, 1H),

6.65 – 6.49 (m, 2H), 6.48 – 6.28 (m, 3H), 5.32 (d, *J* = 10.5 Hz,

1H), 4.89 (d, *J* = 15.8 Hz, 1H), 4.40 (d, *J* = 10.2 Hz, 1H), 4.32

– 4.14 (m, 2H), 2.11 (s, 1H); <sup>13</sup>C NMR (151 MHz, CDCl<sub>3</sub>)  $\delta$  178.1, 169.6, 147.3,

143.1, 136.7, 134.9, 134.4, 132.9, 131.1, 131.0, 130.4, 130.0, 129.9, 128.7, 128.0,

127.5, 127.4, 127.0, 126.5, 123.9, 123.4, 122.6, 122.5, 122.0, 109.8, 109.4, 107.1,

71.9, 55.2, 54.4, 50.0, 43.4; HRMS (ESI) *m/z*. Calcd. for C<sub>35</sub>H<sub>27</sub>BrN<sub>3</sub>O<sub>3</sub><sup>+</sup> ([M+H]<sup>+</sup>)

616.1230, Found 616.1232; Enantiomeric excess was determined to be 95%

(determined by HPLC using chiral AD-H column, hexane/2-propanol = 80/20,  $\lambda$  =

254 nm, 30 °C, 0.8 mL/min, *t*<sub>major</sub> = 16.2 min, *t*<sub>minor</sub> = 10.5 min).

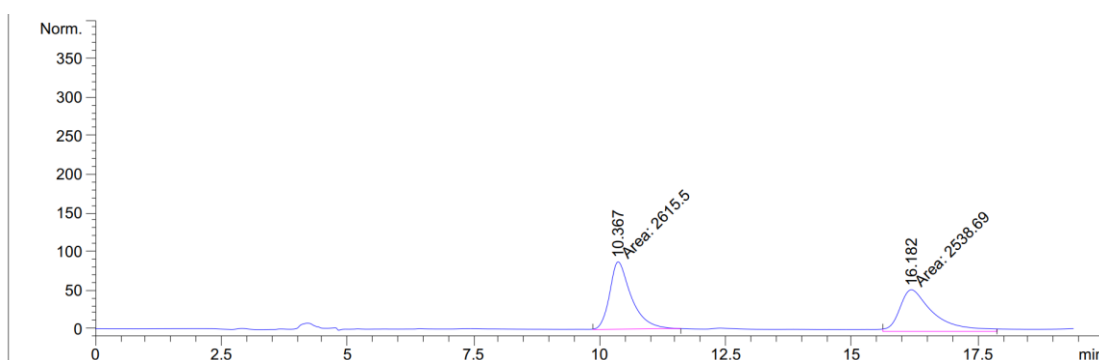

| Peak # | RetTime [min] | Type | Width [min] | Area mAU *s | Height [mAU] | Area %  |
|--------|---------------|------|-------------|-------------|--------------|---------|
| 1      | 10.367        | MM   | 0.4990      | 2615.49902  | 87.35246     | 50.7451 |
| 2      | 16.182        | MM   | 0.7842      | 2538.69385  | 53.95298     | 49.2549 |

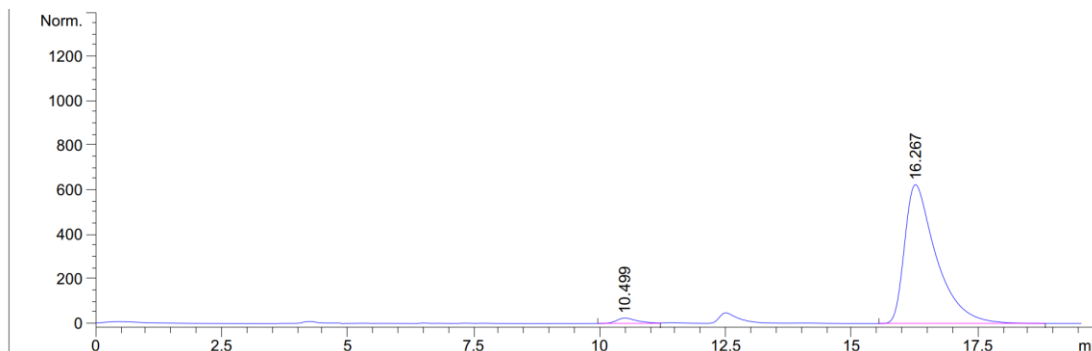

| Peak # | RetTime [min] | Type | Width [min] | Area mAU *s | Height [mAU] | Area %  |
|--------|---------------|------|-------------|-------------|--------------|---------|
| 1      | 10.499        | PV   | 0.4297      | 739.98486   | 24.90297     | 2.6361  |
| 2      | 16.267        | PB   | 0.6419      | 2.73307e4   | 624.12042    | 97.3639 |

**(3bR,5S,6R,6aS)-1'-Benzyl-6-(p-tolyl)-3b,4,6,6a-tetrahydro-7H-spiro[benzo[b]dipyrrolo[1,2-d:2',3'-f][1,4]oxazocine-5,3'-indoline]-2',7-dione (6ag)**

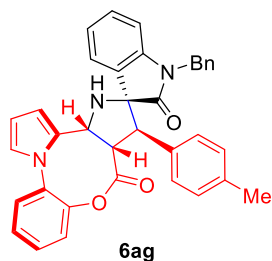

Prepared according to the procedure within 3 days as white solid (104.8 mg, 95% yield, dr > 20:1). mp 181.3 – 184.0 °C;  $[\alpha]_D^{18} = 90.06$  (c 0.32, CH<sub>2</sub>Cl<sub>2</sub>); <sup>1</sup>H NMR (400 MHz, CDCl<sub>3</sub>) δ 7.73 – 7.68 (m, 1H), 7.53 – 7.47 (m, 2H), 7.45 – 7.38 (m, 1H), 7.28 (d, *J* = 8.0 Hz, 1H), 7.18 – 7.10 (m, 3H), 7.08 – 7.01 (m, 2H), 6.93 – 6.82 (m, 4H), 6.78 – 6.74 (m, 1H), 6.49 (d, *J* = 7.5

Hz, 2H), 6.43 (d, *J* = 1.2 Hz, 1H), 6.36 (d, *J* = 6.8 Hz, 1H), 6.33 – 6.28 (m, 1H), 5.33 (d, *J* = 10.6 Hz, 1H), 4.92 (d, *J* = 16.0 Hz, 1H), 4.43 (d, *J* = 10.4 Hz, 1H), 4.30 – 4.10 (m, 2H), 2.27 (s, 3H); <sup>13</sup>C NMR (101 MHz, CDCl<sub>3</sub>) δ 178.4, 169.8, 147.5, 143.1, 137.3, 135.0, 134.7, 133.0, 131.2, 130.3, 129.5, 129.2, 128.5, 128.3, 128.1, 128.0, 127.4, 127.2, 126.6, 123.9, 123.2, 122.5, 121.9, 109.7, 109.3, 106.9, 72.1, 55.5, 54.6, 50.2, 43.3, 21.1; HRMS (ESI) *m/z*. Calcd. for C<sub>36</sub>H<sub>30</sub>N<sub>3</sub>O<sub>3</sub><sup>+</sup> ([M+H]<sup>+</sup>) 552.2282, Found 552.2270; Enantiomeric excess was determined to be 95% (determined by HPLC using chiral AD-H column, hexane/2-propanol = 70/30, λ = 254 nm, 30 °C, 0.8 mL/min, *t*<sub>major</sub> = 13.8 min, *t*<sub>minor</sub> = 7.0 min).

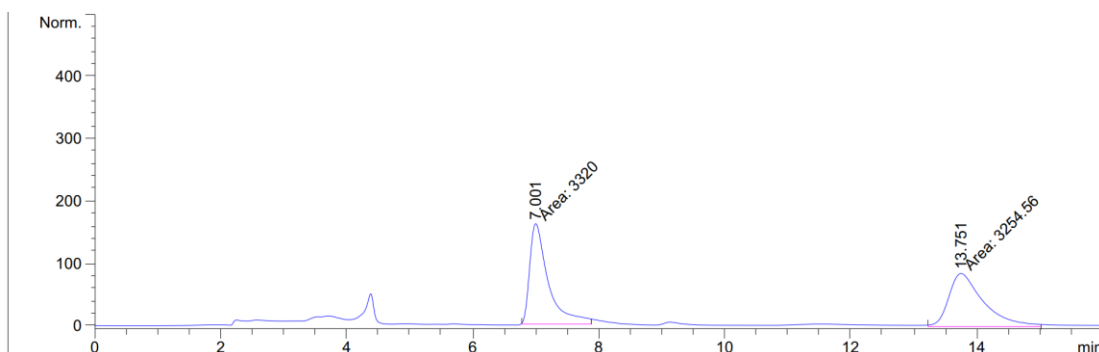

| Peak # | RetTime [min] | Type | Width [min] | Area mAU   | *s | Height [mAU] | Area %  |
|--------|---------------|------|-------------|------------|----|--------------|---------|
| 1      | 7.001         | MM   | 0.3439      | 3319.99731 |    | 160.91309    | 50.4977 |
| 2      | 13.751        | MM   | 0.6387      | 3254.56030 |    | 84.93006     | 49.5023 |

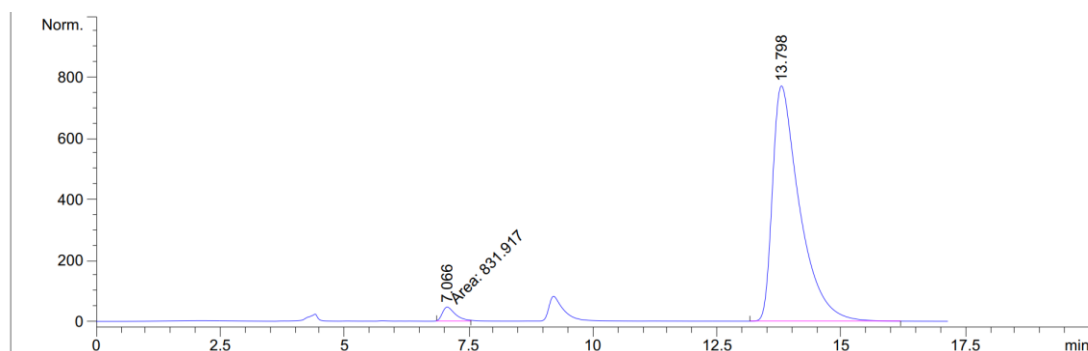

| Peak # | RetTime [min] | Type | Width [min] | Area mAU  | *s | Height [mAU] | Area %  |
|--------|---------------|------|-------------|-----------|----|--------------|---------|
| 1      | 7.066         | MM   | 0.3030      | 831.91742 |    | 45.75506     | 2.7683  |
| 2      | 13.798        | BB   | 0.5551      | 2.92199e4 |    | 769.59216    | 97.2317 |

**(3bR,5S,6R,6aS)-1'-Benzyl-6-(4-methoxyphenyl)-3b,4,6,6a-tetrahydro-7H-spiro[benzo[b]dipyrrolo[1,2-d:2',3'-f][1,4]oxazocine-5,3'-indoline]-2',7-dione (6ah)**

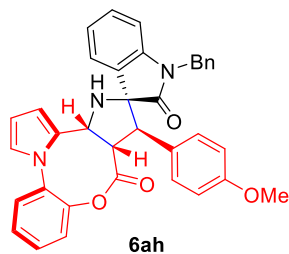

Prepared according to the procedure within 3 days as white solid (90.8 mg, 80% yield, dr > 20:1). mp 182.4 – 183.1 °C;  $[\alpha]_D^{18} = 102.81$  (c 0.39, CH<sub>2</sub>Cl<sub>2</sub>); <sup>1</sup>H NMR (600 MHz, CDCl<sub>3</sub>) δ 7.72 (d, *J* = 7.5 Hz, 1H), 7.55 – 7.49 (m, 2H), 7.46 – 7.41 (m, 1H), 7.30 (d, *J* = 8.0 Hz, 1H), 7.19 – 7.12 (m, 3H), 7.10 – 7.04 (m, 2H), 6.89 (d, *J* = 7.5 Hz, 2H), 6.80 – 6.75 (m, 1H), 6.64 (d, *J* = 8.4 Hz, 2H), 6.48 (d, *J* = 7.6 Hz, 2H), 6.45 (d, *J* = 1.5 Hz, 1H), 6.39 (d, *J* = 7.3 Hz, 1H), 6.34 – 6.29 (m, 1H), 5.33 (d, *J* = 10.7 Hz, 1H), 4.94 (d, *J* = 16.0 Hz, 1H), 4.43 (d, *J* = 10.4 Hz, 1H), 4.27 – 4.15 (m, 2H), 3.72 (s, 3H), 2.43 (s, 1H); <sup>13</sup>C NMR (151 MHz, CDCl<sub>3</sub>) δ 178.5, 169.9, 159.2, 147.5, 143.1, 134.9, 134.7, 133.0,

130.3, 129.6, 129.3, 128.5, 128.3, 128.1, 127.4, 127.3, 126.5, 126.2, 123.9, 123.2, 122.4, 121.9, 113.9, 109.7, 109.3, 106.9, 72.1, 55.1, 55.1, 54.5, 50.2, 43.2; HRMS (ESI)  $m/z$  Calcd. for  $C_{36}H_{30}N_3O_4^+$  ( $[M+H]^+$ ) 568.2231, Found 568.2232; Enantiomeric excess was determined to be 97% (determined by HPLC using chiral AD-H column, hexane/2-propanol = 70/30,  $\lambda = 254$  nm, 30 °C, 0.8 mL/min,  $t_{major} = 18.7$  min,  $t_{minor} = 15.9$  min).

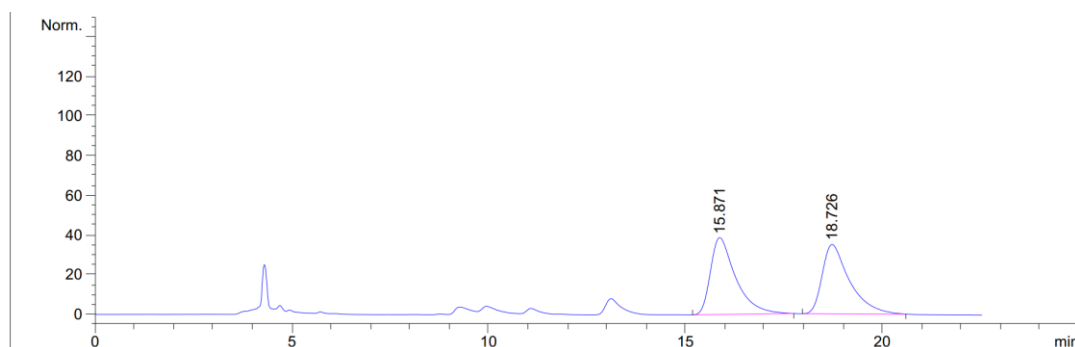

| Peak # | RetTime [min] | Type | Width [min] | Area mAU * s | Height [mAU] | Area %  |
|--------|---------------|------|-------------|--------------|--------------|---------|
| 1      | 15.871        | BB   | 0.6570      | 1731.45947   | 38.72827     | 50.6131 |
| 2      | 18.726        | PB   | 0.7041      | 1689.51038   | 34.92804     | 49.3869 |

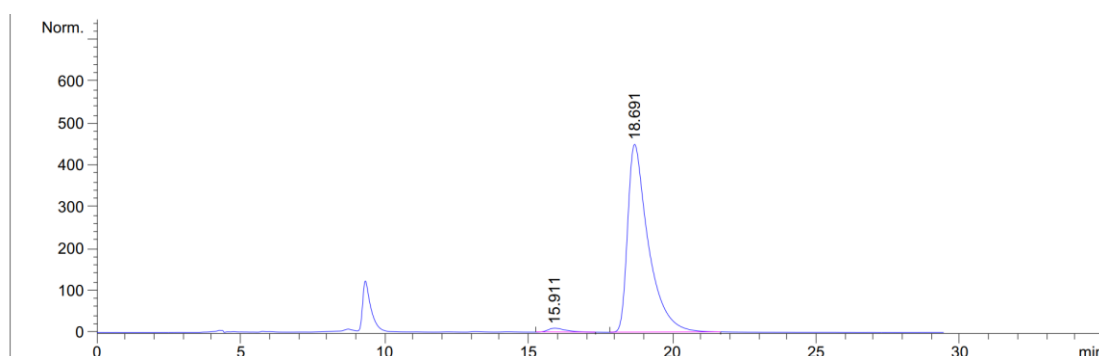

| Peak # | RetTime [min] | Type | Width [min] | Area mAU * s | Height [mAU] | Area %  |
|--------|---------------|------|-------------|--------------|--------------|---------|
| 1      | 15.911        | BB   | 0.6375      | 417.08780    | 9.52604      | 1.8212  |
| 2      | 18.691        | PB   | 0.7282      | 2.24844e4    | 449.16461    | 98.1788 |

**(3bR,5S,6R,6aS)-1'-Benzyl-6-(4-fluorophenyl)-3b,4,6,6a-tetrahydro-7H-spiro[benzo[b]dipyrrolo[1,2-d':3'-f][1,4]oxazocine-5,3'-indoline]-2',7-dione (6ai)**

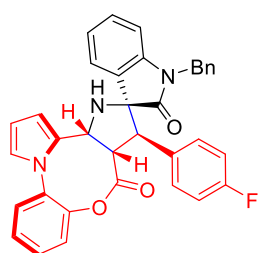

6ai

Prepared according to the procedure within 4 days as white solid (91.1 mg, 82% yield, dr > 20:1). mp 179.1 – 180.5 °C;  $[\alpha]_D^{18} = 60.75$  ( $c$  0.56,  $CH_2Cl_2$ );  $^1H$  NMR (400 MHz,  $CDCl_3$ )  $\delta$  7.74 – 7.69 (m, 1H), 7.57 – 7.49 (m, 2H), 7.48 – 7.41 (m, 1H),



7.31 (d,  $J = 8.0$  Hz, 1H), 7.22 – 7.08 (m, 5H), 6.99 – 6.89 (m, 2H), 6.84 – 6.73 (m, 3H), 6.54 (d,  $J = 7.2$  Hz, 2H), 6.50 – 6.41 (m, 2H), 6.36 – 6.29 (m, 1H), 5.33 (d,  $J = 10.6$  Hz, 1H), 4.89 (d,  $J = 15.9$  Hz, 1H), 4.44 (d,  $J = 10.5$  Hz, 1H), 4.30 – 4.08 (m, 2H), 2.37 (s, 1H);  $^{13}\text{C}$  NMR (101 MHz,  $\text{CDCl}_3$ )  $\delta$  178.2, 169.7, 162.5 (d,  $J = 247.5$  Hz), 147.4, 143.1, 134.9, 134.6, 133.0, 130.3, 130.0 (d,  $J = 4.0$  Hz), 129.9 (d,  $J = 8.1$  Hz), 129.7, 128.6, 128.1, 128.0, 127.5, 127.4, 126.5, 123.9, 123.3, 122.4, 122.0, 115.4 (d,  $J = 21.2$  Hz), 109.8, 109.3, 107.0, 72.0, 55.0, 54.5, 50.2, 43.3;  $^{19}\text{F}$  NMR (377 MHz,  $\text{CDCl}_3$ )  $\delta$  -114.50; HRMS (ESI)  $m/z$  Calcd. for  $\text{C}_{35}\text{H}_{27}\text{FN}_3\text{O}_3^+$  ( $[\text{M}+\text{H}]^+$ ) 556.2031, Found 556.2030; Enantiomeric excess was determined to be 91% (determined by HPLC using chiral AD-H column, hexane/2-propanol = 70/30,  $\lambda = 254$  nm, 30 °C, 0.8 mL/min,  $t_{\text{major}} = 15.8$  min,  $t_{\text{minor}} = 7.7$  min).

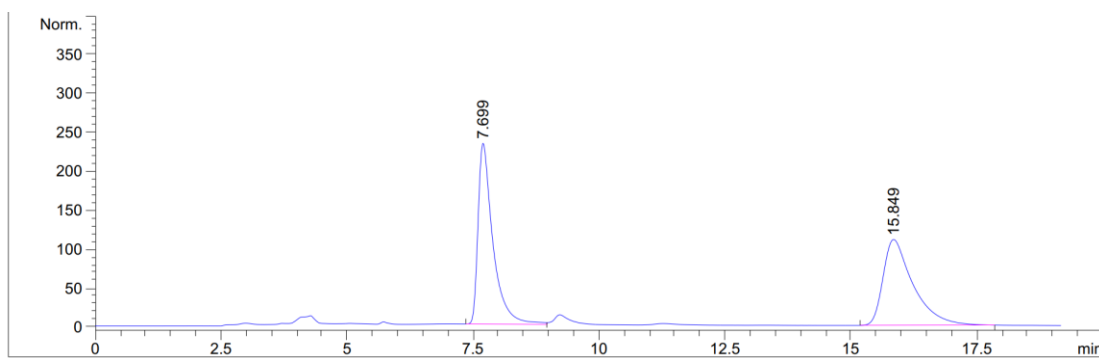

| Peak # | RetTime [min] | Type | Width [min] | Area mAU *s | Height [mAU] | Area %  |
|--------|---------------|------|-------------|-------------|--------------|---------|
| 1      | 7.699         | BV   | 0.2993      | 4763.06006  | 231.94888    | 51.0540 |
| 2      | 15.849        | BB   | 0.5998      | 4566.39258  | 110.23215    | 48.9460 |

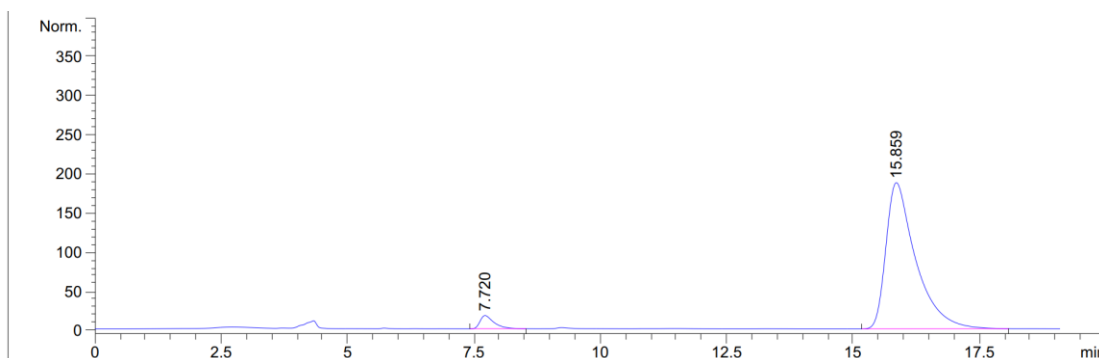

| Peak # | RetTime [min] | Type | Width [min] | Area mAU *s | Height [mAU] | Area %  |
|--------|---------------|------|-------------|-------------|--------------|---------|
| 1      | 7.720         | BB   | 0.2872      | 329.41296   | 17.00260     | 4.1184  |
| 2      | 15.859        | BB   | 0.5966      | 7669.18359  | 186.91556    | 95.8816 |

**(3bR,5S,6R,6aS)-1'-Benzyl-6-(4-chlorophenyl)-3b,4,6,6a-tetrahydro-7H-spiro[benzo[b]dipyrrolo[1,2-d:2',3'-f][1,4]oxazocine-5,3'-indoline]-2',7-dione (6aj)**

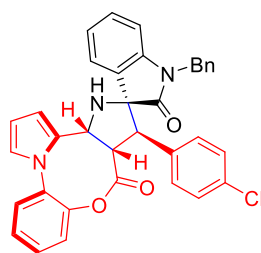

6aj

Prepared according to the procedure within 3 days as white solid (85.8 mg, 75% yield, dr > 20:1). mp 183.8 – 184.3 °C;  $[\alpha]_D^{18} = 106.31$  (*c* 0.71, CH<sub>2</sub>Cl<sub>2</sub>); <sup>1</sup>H NMR (600 MHz, CDCl<sub>3</sub>) δ 7.73 – 7.70 (m, 1H), 7.57 – 7.49 (m, 2H), 7.47 – 7.42 (m, 1H), 7.33 – 7.29 (m, 1H), 7.22 – 7.13 (m, 5H), 7.07 (d, *J* = 8.4 Hz, 2H), 6.91 (d, *J* = 8.4 Hz, 2H), 6.80 – 6.76 (m, 1H), 6.52 (d, *J* = 7.0 Hz, 2H), 6.47 – 6.41 (m, 2H), 6.35 – 6.30 (m, 1H), 5.33 (d, *J* = 10.6 Hz, 1H), 4.93 (d, *J* = 15.9 Hz, 1H), 4.43 (d, *J* = 10.4 Hz, 1H), 4.33 – 4.10 (m, 2H), 2.48 (s, 1H); <sup>13</sup>C NMR (151 MHz, CDCl<sub>3</sub>) δ 178.1, 169.6, 147.4, 143.1, 134.8, 134.5, 133.8, 132.9, 132.8, 130.4, 129.8, 129.6, 128.7, 128.7, 128.1, 127.9, 127.5, 127.5, 126.4, 123.9, 123.4, 122.4, 122.0, 109.8, 109.4, 107.0, 71.9, 55.1, 54.5, 50.1, 43.4; HRMS (ESI) *m/z* Calcd. for C<sub>35</sub>H<sub>27</sub>ClN<sub>3</sub>O<sub>3</sub><sup>+</sup> ([M+H]<sup>+</sup>) 572.1735, Found 572.1741; Enantiomeric excess was determined to be 97% (determined by HPLC using chiral AD-H column, hexane/2-propanol = 70/30, λ = 254 nm, 30 °C, 0.8 mL/min, *t*<sub>major</sub> = 16.3 min, *t*<sub>minor</sub> = 7.8 min).

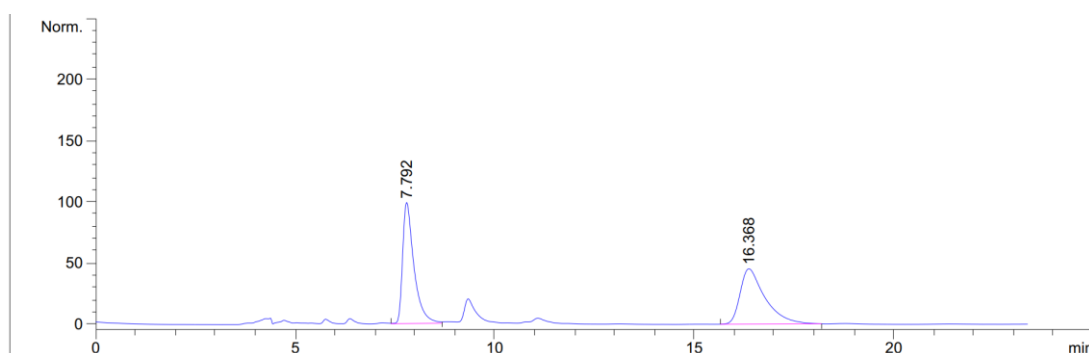

| Peak # | RetTime [min] | Type | Width [min] | Area mAU *s | Height [mAU] | Area %  |
|--------|---------------|------|-------------|-------------|--------------|---------|
| 1      | 7.792         | VV   | 0.2907      | 1957.60144  | 98.85339     | 50.0192 |
| 2      | 16.368        | BB   | 0.6287      | 1956.09497  | 45.19791     | 49.9808 |

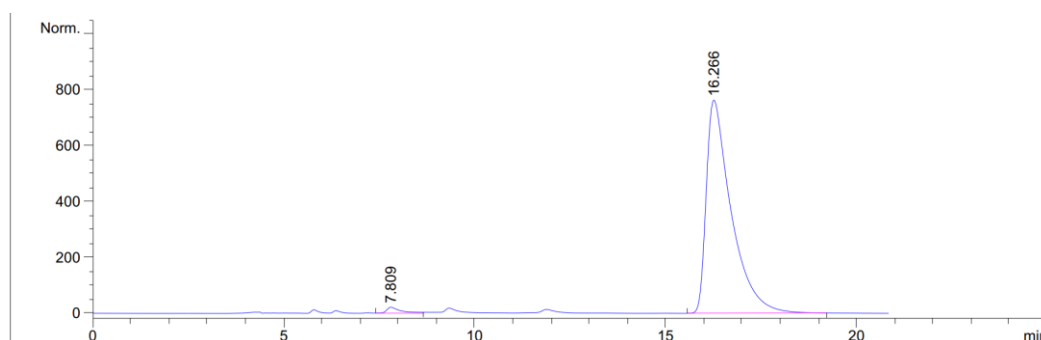

| Peak # | RetTime [min] | Type | Width [min] | Area mAU *s | Height [mAU] | Area %  |
|--------|---------------|------|-------------|-------------|--------------|---------|
| 1      | 7.809         | VB   | 0.3748      | 571.24188   | 21.25062     | 1.6287  |
| 2      | 16.266        | PB   | 0.6551      | 3.45030e4   | 761.81549    | 98.3713 |

**(3bR,5S,6R,6aS)-1'-Benzyl-6-(4-bromophenyl)-3b,4,6,6a-tetrahydro-7H-spiro[benzo[b]dipyrrolo[1,2-d:2',3'-f][1,4]oxazocine-5,3'-indoline]-2',7-dione (6ak)**

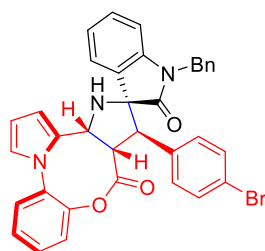

6ak

Prepared according to the procedure within 3 days as white solid (101.1 mg, 82% yield, dr > 20:1). mp 185.1 – 186.0 °C;  $[\alpha]_D^{18} = 89.80$  (*c* 1.00, CH<sub>2</sub>Cl<sub>2</sub>); <sup>1</sup>H NMR (600 MHz, CDCl<sub>3</sub>) δ 7.73 – 7.69 (m, 1H), 7.56 – 7.50 (m, 2H), 7.47 – 7.42 (m, 1H), 7.30 (dd, *J* = 8.0, 1.2 Hz, 1H), 7.22 (d, *J* = 8.5 Hz, 2H), 7.20 – 7.15 (m, 5H), 6.85 (d, *J* = 8.5 Hz, 2H), 6.80 – 6.76 (m, 1H), 6.55 – 6.51 (m, 2H), 6.47 – 6.41 (m, 2H), 6.35 – 6.30 (m, 1H),

5.32 (d, *J* = 10.6 Hz, 1H), 4.93 (d, *J* = 15.9 Hz, 1H), 4.41 (d, *J* = 10.4 Hz, 1H), 4.32 – 4.11 (m, 2H), 2.49 (s, 1H); <sup>13</sup>C NMR (101 MHz, CDCl<sub>3</sub>) δ 178.1, 169.6, 147.4, 143.1, 134.8, 134.5, 133.4, 132.9, 131.7, 130.4, 130.0, 129.8, 128.7, 128.1, 127.8, 127.5, 127.5, 126.5, 123.9, 123.4, 122.4, 122.0, 122.0, 109.8, 109.4, 107.1, 71.9, 55.2, 54.5, 50.1, 43.4; HRMS (ESI) *m/z* Calcd. for C<sub>35</sub>H<sub>27</sub>BrN<sub>3</sub>O<sub>3</sub><sup>+</sup> ([M+H]<sup>+</sup>) 616.1230, Found 616.1231; Enantiomeric excess was determined to be 97% (determined by HPLC using chiral AD-H column, hexane/2-propanol = 70/30, λ = 254 nm, 30 °C, 0.8 mL/min, *t*<sub>major</sub> = 16.8 min, *t*<sub>minor</sub> = 8.0 min).

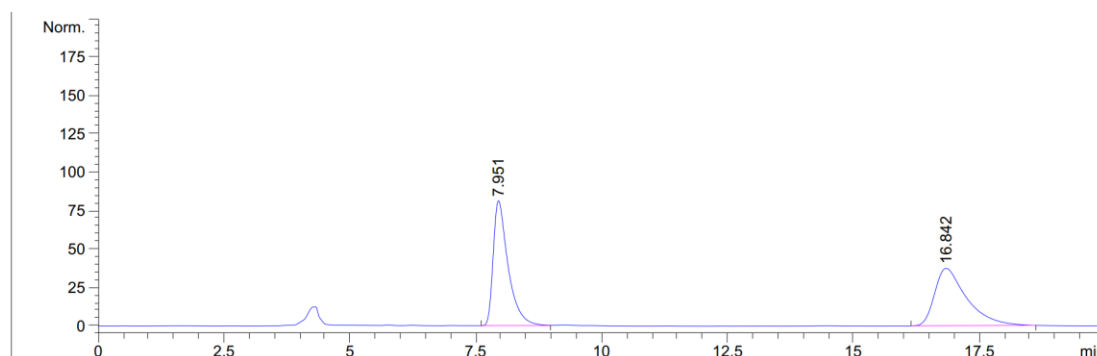

| Peak # | RetTime [min] | Type | Width [min] | Area mAU *s | Height [mAU] | Area %  |
|--------|---------------|------|-------------|-------------|--------------|---------|
| 1      | 7.951         | BB   | 0.3030      | 1674.73987  | 81.28655     | 50.2690 |
| 2      | 16.842        | BB   | 0.6387      | 1656.81799  | 37.43505     | 49.7310 |

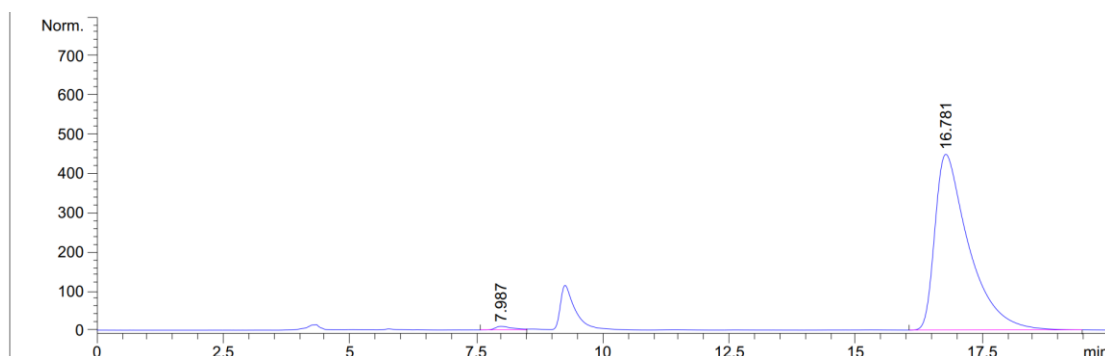

| Peak # | RetTime [min] | Type | Width [min] | Area mAU *s | Height [mAU] | Area %  |
|--------|---------------|------|-------------|-------------|--------------|---------|
| 1      | 7.987         | BV   | 0.3530      | 234.20956   | 9.40867      | 1.1079  |
| 2      | 16.781        | BB   | 0.6733      | 2.09058e4   | 448.54404    | 98.8921 |

**(3bR,5S,6R,6aS)-1'-Benzyl-6-(naphthalen-1-yl)-3b,4,6,6a-tetrahydro-7H-spiro[benzo[b]dipyrrolo[1,2-d:2',3'-f][1,4]oxazocine-5,3'-indoline]-2',7-dione (6al)**

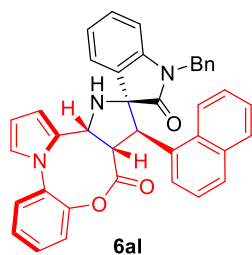

Prepared according to the procedure within 3 days as white solid (105.8 mg, 90% yield, dr > 20:1). mp 228.2 – 229.1 °C;  $[\alpha]_D^{18} = 65.17$  (c 0.71, CH<sub>2</sub>Cl<sub>2</sub>); <sup>1</sup>H NMR (600 MHz, CDCl<sub>3</sub>) δ 7.98 (d, *J* = 8.7 Hz, 1H), 7.87 (d, *J* = 7.3 Hz, 1H), 7.71 – 7.66 (m, 2H), 7.56 (d, *J* = 7.3 Hz, 1H), 7.52 (dd, *J* = 7.7, 1.4 Hz, 1H), 7.49 – 7.45 (m, 1H), 7.44 – 7.39 (m, 1H), 7.30 – 7.24 (m, 2H), 7.24 – 7.17 (m, 2H), 7.11 – 7.04 (m, 2H), 6.99 – 6.91 (m, 3H), 6.76 (s, 1H), 6.51 (d, *J* = 1.6 Hz, 1H), 6.37 – 6.29 (m, 3H), 6.11 (d, *J* = 7.8 Hz, 1H), 5.56 (d, *J* = 9.6 Hz, 1H), 5.51 (d, *J* = 10.5 Hz, 1H), 4.83 (d, *J* = 16.0 Hz, 1H), 4.31 (t, *J* = 10.1 Hz, 1H), 4.12 (d, *J* = 16.0 Hz, 1H), 2.67 (s, 1H); <sup>13</sup>C NMR (151 MHz, CDCl<sub>3</sub>) δ 178.8, 170.3, 147.5, 142.9, 134.8, 134.6, 133.7, 133.1, 132.5, 131.3, 130.3, 129.6, 128.5, 128.3, 128.3, 128.1, 127.5, 127.2, 126.3, 125.8, 125.6, 125.2, 125.1, 124.3, 123.7, 122.9, 122.5, 122.2, 109.8, 109.2, 107.2, 72.7, 55.4, 53.1, 49.5, 43.2; HRMS (ESI) *m/z* Calcd. for C<sub>39</sub>H<sub>30</sub>N<sub>3</sub>O<sub>3</sub><sup>+</sup> ([M+H]<sup>+</sup>) 588.2282, Found 588.2286; Enantiomeric excess was determined to be 97% (determined by HPLC using chiral AD-H column, hexane/2-propanol = 80/20, λ = 254 nm, 30 °C, 0.8 mL/min, *t*<sub>major</sub> = 16.2 min, *t*<sub>minor</sub> = 10.4 min).

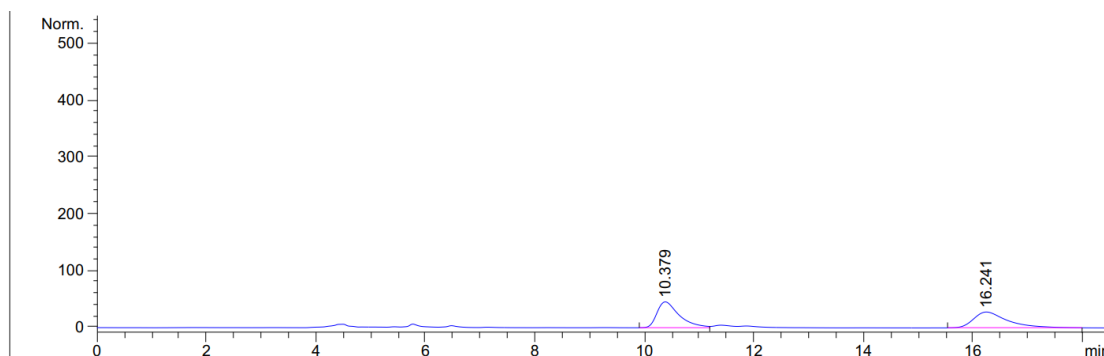

| Peak # | RetTime [min] | Type | Width [min] | Area mAU *s | Height [mAU] | Area %  |
|--------|---------------|------|-------------|-------------|--------------|---------|
| 1      | 10.379        | BV   | 0.4213      | 1290.09753  | 45.46581     | 51.7704 |
| 2      | 16.241        | BB   | 0.6310      | 1201.86389  | 27.88065     | 48.2296 |

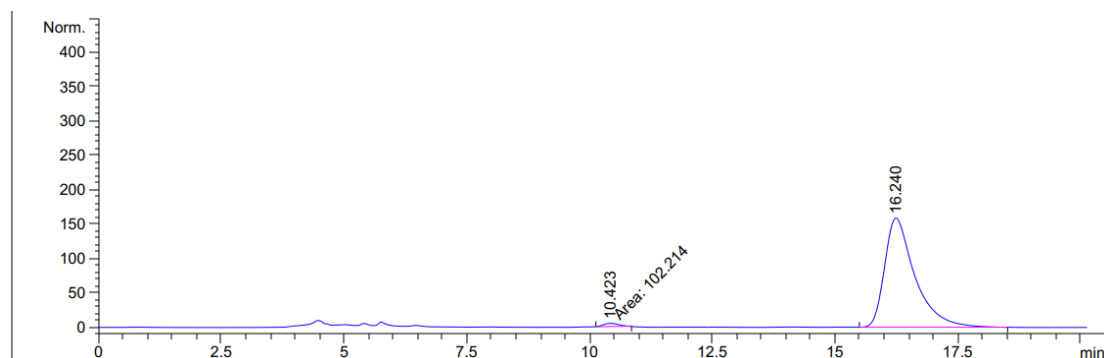

| Peak # | RetTime [min] | Type | Width [min] | Area mAU *s | Height [mAU] | Area %  |
|--------|---------------|------|-------------|-------------|--------------|---------|
| 1      | 10.423        | MM   | 0.3598      | 102.21376   | 4.73505      | 1.4784  |
| 2      | 16.240        | BB   | 0.6301      | 6811.66406  | 158.77936    | 98.5216 |

**(3bR,5S,6S,6aS)-1'-Benzyl-6-(thiophen-2-yl)-3b,4,6,6a-tetrahydro-7H-spiro[benzo[b]dipyrrolo[1,2-d:2',3'-f][1,4]oxazocine-5,3'-indoline]-2',7-dione (6am)**

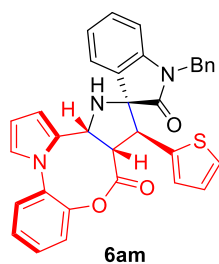

Prepared according to the procedure within 3 days as white solid (103.3 mg, 95% yield, dr > 20:1). mp 176.8 – 177.4 °C;  $[\alpha]_D^{18} = 54.40$  (*c* 0.77, CH<sub>2</sub>Cl<sub>2</sub>); <sup>1</sup>H NMR (600 MHz, CDCl<sub>3</sub>) δ 7.69 (dd, *J* = 7.1, 1.3 Hz, 1H), 7.56 – 7.49 (m, 2H), 7.46 – 7.42 (m, 1H), 7.35 (dd, *J* = 8.0, 1.2 Hz, 1H), 7.24 – 7.12 (m, 5H), 7.04 (dd, *J* = 5.1, 1.0 Hz, 1H), 6.82 (dd, *J* = 5.0, 3.6 Hz, 1H), 6.79 – 6.77 (m, 1H), 6.64 (dd, *J* = 10.9, 5.2 Hz, 3H), 6.54 – 6.48 (m, 1H), 6.45 – 6.42 (m, 1H), 6.34 – 6.28 (m, 1H), 5.32 (d, *J* = 10.7 Hz, 1H), 4.93 (d, *J* = 15.9 Hz, 1H), 4.69 (d, *J* = 10.3 Hz, 1H), 4.30 (d, *J* = 15.9 Hz, 1H), 4.24 (t, *J* = 10.5 Hz, 1H), 2.44 (s, 1H); <sup>13</sup>C NMR (151

MHz, CDCl<sub>3</sub>)  $\delta$  178.0, 169.5, 147.4, 143.6, 137.4, 135.0, 134.3, 132.9, 130.4, 129.9, 128.7, 128.1, 127.7, 127.5, 127.3, 126.9, 126.7, 125.4, 124.5, 124.0, 123.3, 122.5, 122.0, 109.8, 109.3, 107.0, 71.5, 54.3, 51.9, 51.0, 43.4; HRMS (ESI)  $m/z$  Calcd. For C<sub>33</sub>H<sub>26</sub>N<sub>3</sub>O<sub>3</sub>S<sup>+</sup> ([M+H]<sup>+</sup>) 544.1689, Found 544.1694; Enantiomeric excess was determined to be 95% (determined by HPLC using chiral AD-H column, hexane/2-propanol = 80/20,  $\lambda$  = 254 nm, 30 °C, 0.8 mL/min,  $t_{\text{major}}$  = 18.5 min,  $t_{\text{minor}}$  = 9.8 min).

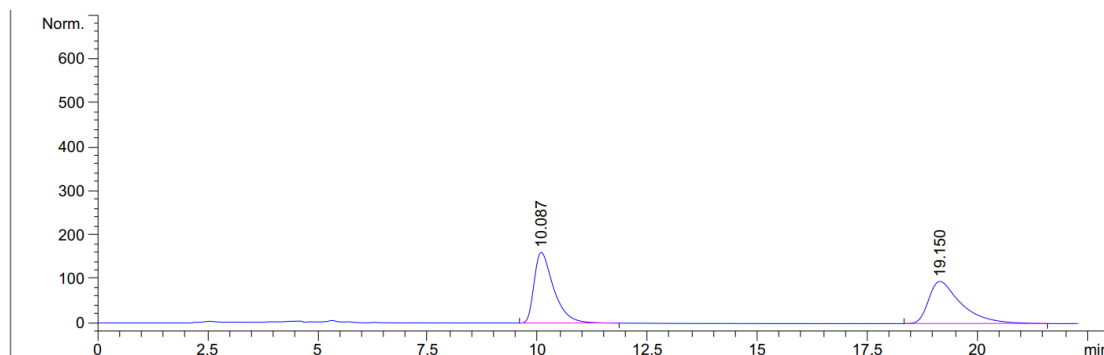

| Peak # | RetTime [min] | Type | Width [min] | Area mAU *s | Height [mAU] | Area %  |
|--------|---------------|------|-------------|-------------|--------------|---------|
| 1      | 10.087        | BB   | 0.4660      | 4963.15283  | 160.32707    | 50.1010 |
| 2      | 19.150        | BB   | 0.7519      | 4943.14014  | 95.80633     | 49.8990 |

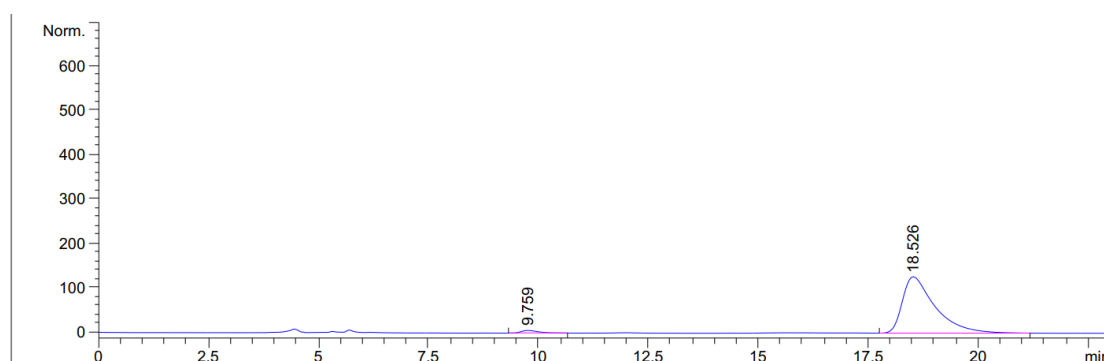

| Peak # | RetTime [min] | Type | Width [min] | Area mAU *s | Height [mAU] | Area %  |
|--------|---------------|------|-------------|-------------|--------------|---------|
| 1      | 9.759         | BB   | 0.4208      | 164.60437   | 5.88726      | 2.4549  |
| 2      | 18.526        | PB   | 0.7510      | 6540.66602  | 126.95496    | 97.5451 |

**(3bR,5S,6S,6aS)-1'-Benzyl-6-methyl-3b,4,6,6a-tetrahydro-7H-spiro[benzo[b]dipyrrolo[1,2-d':2',3'-f][1,4]oxazocine-5,3'-indoline]-2',7-dione (6an)**

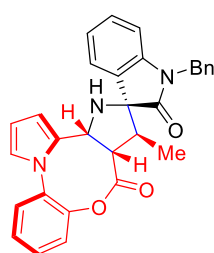

Prepared according to the procedure within 3 days as white solid (66.6 mg, 70% yield, dr > 20:1). mp 136.8 – 137.4 °C;  $[\alpha]_D^{18} = 87.11$  (c 0.57, CH<sub>2</sub>Cl<sub>2</sub>); <sup>1</sup>H NMR (600 MHz, CDCl<sub>3</sub>)  $\delta$  7.54 – 7.43 (m, 3H), 7.40 – 7.35 (m, 1H), 7.34 – 7.27 (m, 3H), 7.27 – 7.19 (m,

4H), 7.15 – 7.09 (m, 1H), 6.78 – 6.67 (m, 2H), 6.33 (d,  $J = 59.8$  Hz, 2H), 5.07 (d,  $J = 10.7$  Hz, 1H), 4.93 (d,  $J = 15.5$  Hz, 1H), 4.64 (d,  $J = 15.6$  Hz, 1H), 3.48 (t,  $J = 10.1$  Hz, 1H), 3.32 – 3.07 (m, 1H), 2.16 (s, 1H), 0.83 (d,  $J = 6.3$  Hz, 3H);  $^{13}\text{C}$  NMR (151 MHz,  $\text{CDCl}_3$ )  $\delta$  179.0, 170.4, 147.4, 143.3, 135.8, 135.0, 132.9, 130.1, 129.5, 128.9, 128.5, 127.9, 127.8, 127.3, 124.0, 123.3, 122.6, 121.6, 109.7, 109.1, 106.8, 70.7, 54.3, 52.4, 45.3, 43.6, 12.7; HRMS (ESI)  $m/z$  Calcd. for  $\text{C}_{30}\text{H}_{26}\text{N}_3\text{O}_3^+$  ( $[\text{M}+\text{H}]^+$ ) 476.1969, Found 476.1975; Enantiomeric excess was determined to be 95% (determined by HPLC using chiral AD-H column, hexane/2-propanol = 70/30,  $\lambda = 254$  nm, 30 °C, 0.8 mL/min,  $t_{\text{major}} = 11.0$  min,  $t_{\text{minor}} = 7.9$  min).

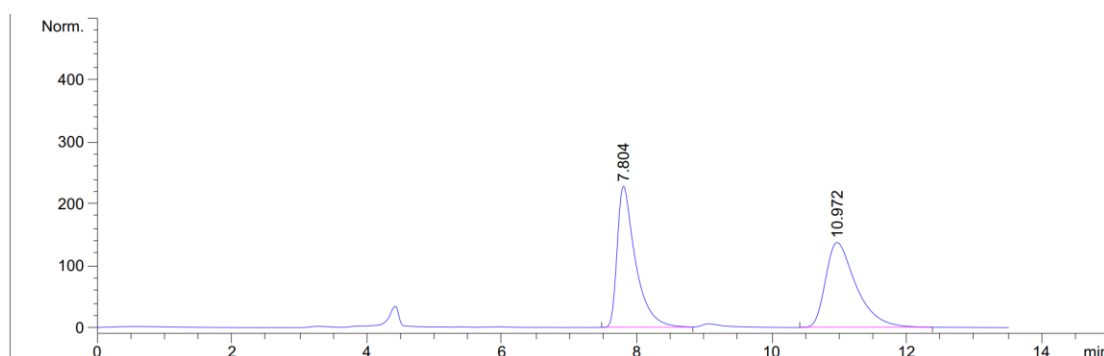

| Peak # | RetTime [min] | Type | Width [min] | Area mAU *s | Height [mAU] | Area %  |
|--------|---------------|------|-------------|-------------|--------------|---------|
| 1      | 7.804         | BV   | 0.2745      | 4298.10107  | 227.32347    | 50.0183 |
| 2      | 10.972        | PB   | 0.4670      | 4294.95459  | 136.71100    | 49.9817 |

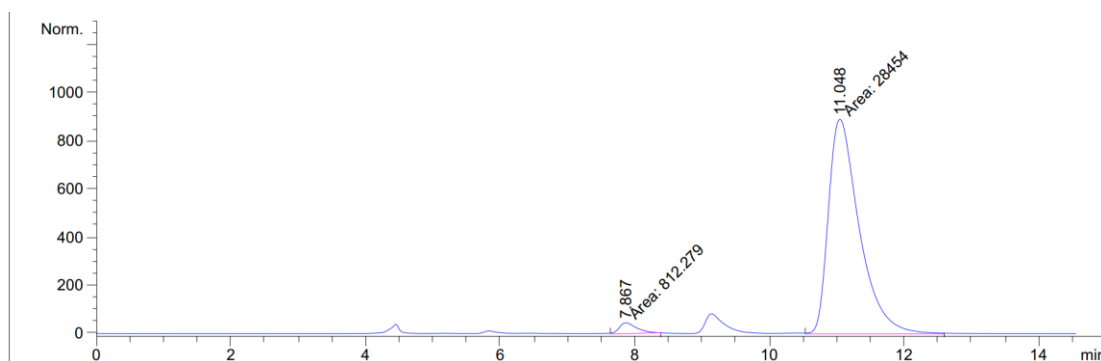

| Peak # | RetTime [min] | Type | Width [min] | Area mAU *s | Height [mAU] | Area %  |
|--------|---------------|------|-------------|-------------|--------------|---------|
| 1      | 7.867         | MM   | 0.2980      | 812.27948   | 45.43024     | 2.7755  |
| 2      | 11.048        | MM   | 0.5323      | 2.84540e4   | 890.86481    | 97.2245 |

**(3bR,5S,6R,6aS)-1'-Benzyl-11-methyl-6-phenyl-3b,4,6,6a-tetrahydro-7H-spiro[benzo[b]dipyrrolo[1,2-d:2',3'-f][1,4]oxazocine-5,3'-indoline]-2',7-dione (6ao)**

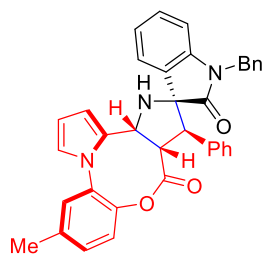

**6ao**

Prepared according to the procedure within 3 days as white solid (88.3 mg, 80% yield, dr > 20:1). mp 173.8 – 174.4 °C;  $[\alpha]_D^{18} = 81.25$  (*c* 0.32, CH<sub>2</sub>Cl<sub>2</sub>); <sup>1</sup>H NMR (600 MHz, CDCl<sub>3</sub>) δ 7.73 (dd, *J* = 7.2, 1.1 Hz, 1H), 7.32 – 7.29 (m, 2H), 7.22 – 7.05 (m, 9H), 6.98 (d, *J* = 7.5 Hz, 2H), 6.78 – 6.75 (m, 1H), 6.47 (d, *J* = 7.5 Hz, 2H), 6.45 – 6.42 (m, 1H), 6.37 (d, *J* = 7.3 Hz, 1H), 6.32 – 6.30 (m, 1H), 5.37 (d, *J* = 10.7 Hz, 1H), 4.90 (d, *J* = 16.0 Hz, 1H), 4.47 (d, *J* = 10.3 Hz, 1H), 4.29 (t, *J* = 10.5 Hz, 1H), 4.21 (d, *J* = 16.0 Hz, 1H), 2.47 (s, 3H); <sup>13</sup>C NMR (151 MHz, CDCl<sub>3</sub>) δ 178.3, 170.2, 145.1, 143.1, 137.6, 134.9, 134.5, 134.3, 132.6, 130.8, 129.6, 128.6, 128.5, 128.4, 128.2, 128.2, 127.7, 127.2, 126.4, 123.9, 123.2, 122.0, 121.9, 109.6, 109.3, 106.8, 72.2, 55.9, 54.7, 49.9, 43.3, 20.9; HRMS (ESI) *m/z* Calcd. for C<sub>36</sub>H<sub>30</sub>N<sub>3</sub>O<sub>3</sub><sup>+</sup> ([M+H]<sup>+</sup>) 552.2282, Found 552.2280; Enantiomeric excess was determined to be 87% (determined by HPLC using chiral AD-H column, hexane/2-propanol = 70/30, λ = 254 nm, 30 °C, 0.8 mL/min, *t*<sub>major</sub> = 14.0 min, *t*<sub>minor</sub> = 7.7 min).

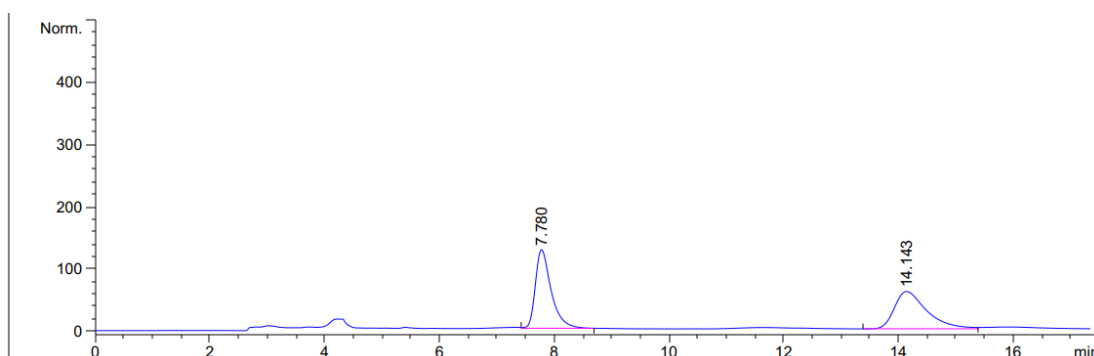

| Peak # | RetTime [min] | Type | Width [min] | Area mAU *s | Height [mAU] | Area %  |
|--------|---------------|------|-------------|-------------|--------------|---------|
| 1      | 7.780         | VB   | 0.2862      | 2424.52075  | 126.50131    | 50.6784 |
| 2      | 14.143        | VB   | 0.5834      | 2359.61255  | 60.08018     | 49.3216 |

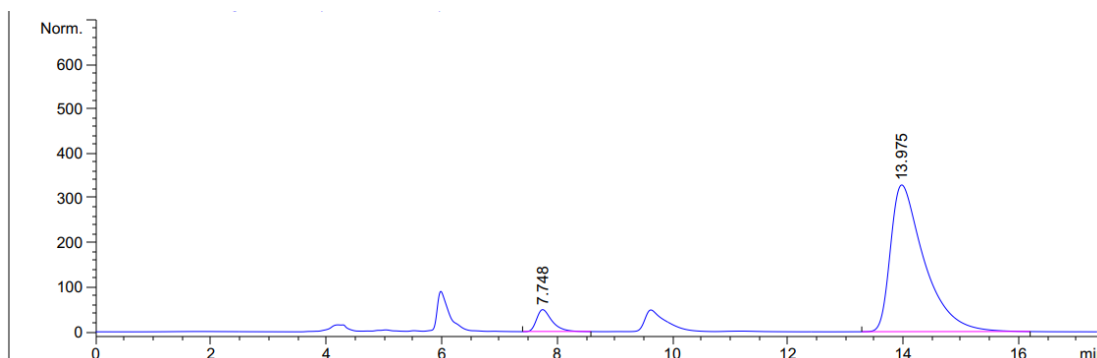



| Peak # | RetTime [min] | Type | Width [min] | Area mAU *s | Height [mAU] | Area %  |
|--------|---------------|------|-------------|-------------|--------------|---------|
| 1      | 7.748         | VB   | 0.2805      | 921.54401   | 49.34382     | 6.4358  |
| 2      | 13.975        | BB   | 0.6013      | 1.33975e4   | 329.34894    | 93.5642 |

**(3bR,5S,6R,6aS)-1'-Benzyl-11-chloro-6-phenyl-3b,4,6,6a-tetrahydro-7H-spiro[benzo[b]dipyrrolo[1,2-d:2',3'-f][1,4]oxazocine-5,3'-indoline]-2',7-dione (6ap)**

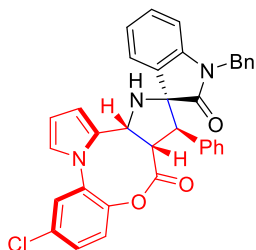

**6ap**

Prepared according to the procedure within 3 days as white solid (93.8 mg, 82% yield, dr > 20:1). mp 178.4 – 179.3 °C;  $[\alpha]_D^{18} = 87.71$  (c 0.48, CH<sub>2</sub>Cl<sub>2</sub>); <sup>1</sup>H NMR (400 MHz, CDCl<sub>3</sub>) δ 7.74 – 7.67 (m, 1H), 7.53 – 7.45 (m, 2H), 7.25 – 7.03 (m, 9H), 6.97 (d, *J* = 7.5 Hz, 2H), 6.78 – 6.73 (m, 1H), 6.52 – 6.43 (m, 3H), 6.40 – 6.35 (m, 1H), 6.34 – 6.30 (m, 1H), 5.37 (d, *J* = 10.6 Hz, 1H), 4.88 (d, *J* = 15.9 Hz, 1H), 4.44 (d, *J* = 10.4 Hz, 1H), 4.32 – 4.14 (m, 2H), 2.10 (s, 1H); <sup>13</sup>C NMR (101 MHz, CDCl<sub>3</sub>) δ 178.3, 169.3, 146.1, 143.1, 134.9, 134.5, 134.0, 133.9, 132.5, 130.3, 129.7, 128.6, 128.5, 128.2, 128.2, 128.0, 127.8, 127.2, 126.5, 123.9, 123.5, 123.2, 121.9, 110.3, 109.3, 107.5, 72.1, 55.7, 54.4, 50.0, 43.3; HRMS (ESI) *m/z* Calcd. for C<sub>35</sub>H<sub>27</sub>ClN<sub>3</sub>O<sub>3</sub><sup>+</sup> ([M+H]<sup>+</sup>) 572.1735, Found 572.1740; Enantiomeric excess was determined to be 91% (determined by HPLC using chiral AD-H column, hexane/2-propanol = 70/30, λ = 254 nm, 30 °C, 0.8 mL/min, *t*<sub>major</sub> = 14.7 min, *t*<sub>minor</sub> = 8.4 min).

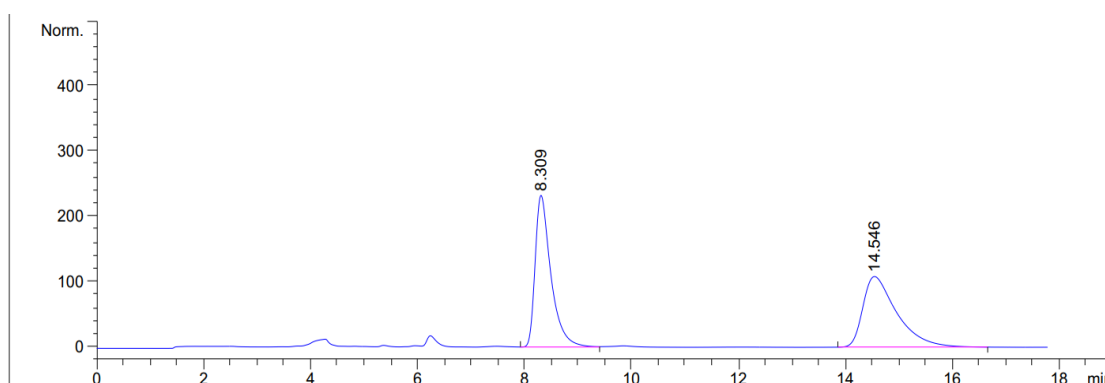

| Peak # | RetTime [min] | Type | Width [min] | Area mAU *s | Height [mAU] | Area %  |
|--------|---------------|------|-------------|-------------|--------------|---------|
| 1      | 8.309         | VB   | 0.3039      | 4783.12402  | 232.62761    | 50.0508 |
| 2      | 14.546        | BB   | 0.6510      | 4773.40869  | 108.31654    | 49.9492 |

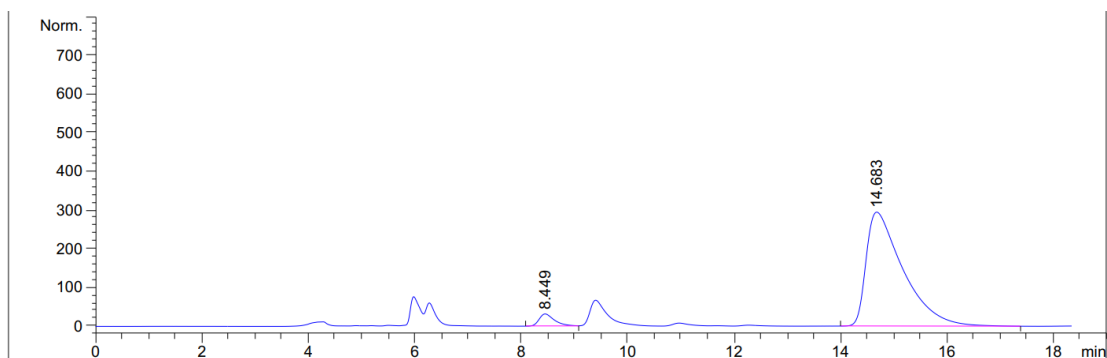

| Peak # | RetTime [min] | Type | Width [min] | Area mAU * s | Height [mAU] | Area %  |
|--------|---------------|------|-------------|--------------|--------------|---------|
| 1      | 8.449         | BV   | 0.3037      | 643.83746    | 31.53329     | 4.3234  |
| 2      | 14.683        | BB   | 0.7059      | 1.42480e4    | 294.37244    | 95.6766 |

**(3bR,5S,6R,6aS)-1'-Benzyl-11-bromo-6-phenyl-3b,4,6,6a-tetrahydro-7H-spiro[benzo[b]dipyrrolo[1,2-d':3'-f][1,4]oxazocine-5,3'-indoline]-2',7-dione (6aq)**

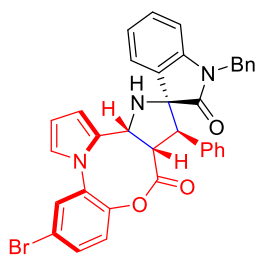

**6aq**

Prepared according to the procedure within 3 days as white solid (91.5 mg, 80% yield, dr > 20:1). mp 186.4 – 187.4 °C;  $[\alpha]_D^{18} = 122.67$  (c 0.32, CH<sub>2</sub>Cl<sub>2</sub>); <sup>1</sup>H NMR (600 MHz, CDCl<sub>3</sub>) δ 7.71 (d, *J* = 6.8 Hz, 1H), 7.68 – 7.60 (m, 2H), 7.22 – 7.05 (m, 9H), 6.97 (d, *J* = 7.6 Hz, 2H), 6.76 (s, 1H), 6.51 – 6.43 (m, 3H), 6.39 – 6.30 (m, 2H), 5.36 (d, *J* = 10.7 Hz, 1H), 4.89 (d, *J* = 16.0 Hz, 1H), 4.44 (d, *J* = 10.4 Hz, 1H), 4.32 – 4.13 (m, 2H), 2.31 (s, 1H); <sup>13</sup>C NMR (151 MHz, CDCl<sub>3</sub>) δ 178.3, 169.3, 146.6, 143.1, 134.8, 134.6, 134.2, 134.0, 133.3, 131.1, 129.7, 128.6, 128.5, 128.2, 128.0, 127.8, 127.2, 126.5, 123.9, 123.9, 123.2, 121.9, 119.8, 110.3, 109.3, 107.5, 72.1, 55.7, 54.4, 50.0, 43.3; HRMS (ESI) *m/z* Calcd. for C<sub>35</sub>H<sub>27</sub>BrN<sub>3</sub>O<sub>3</sub><sup>+</sup> ([M+H]<sup>+</sup>) 616.1230, Found 616.1221; Enantiomeric excess was determined to be 96% (determined by HPLC using chiral AD-H column, hexane/2-propanol = 70/30, λ = 254 nm, 30 °C, 0.8 mL/min, *t*<sub>major</sub> = 14.5 min, *t*<sub>minor</sub> = 8.2 min).

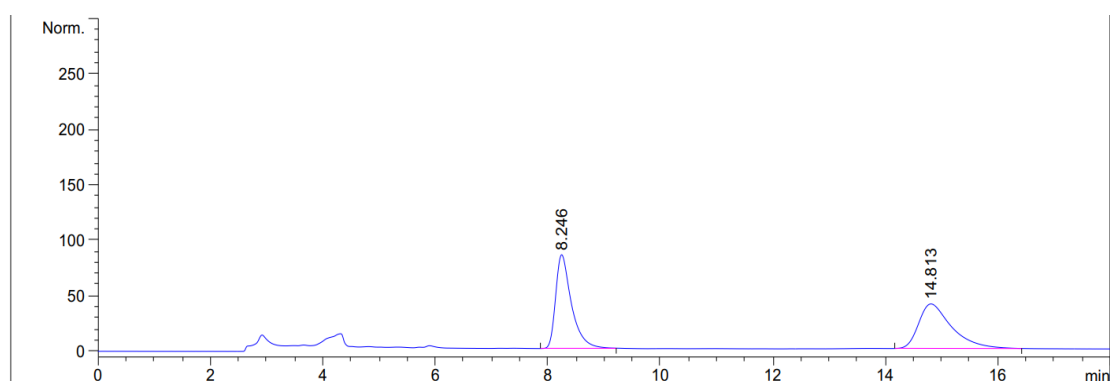

| Peak # | RetTime [min] | Type | Width [min] | Area mAU *s | Height [mAU] | Area %  |
|--------|---------------|------|-------------|-------------|--------------|---------|
| 1      | 8.246         | PB   | 0.2905      | 1652.02979  | 84.59119     | 50.1329 |
| 2      | 14.813        | BB   | 0.6078      | 1643.26770  | 40.21438     | 49.8671 |

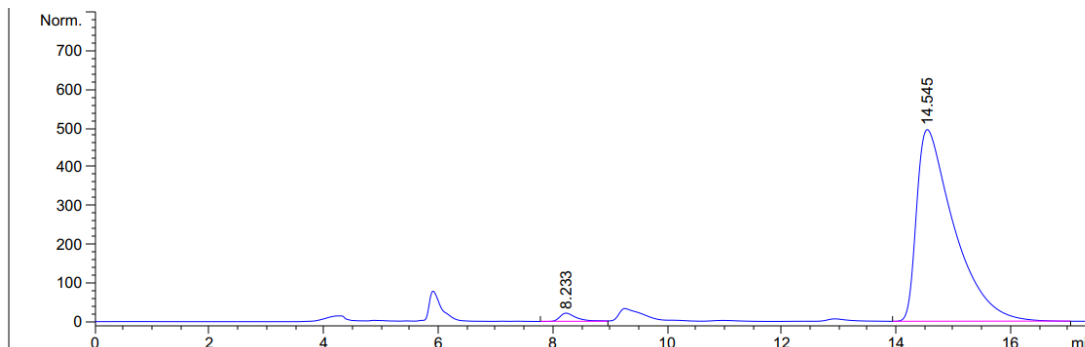

| Peak # | RetTime [min] | Type | Width [min] | Area mAU *s | Height [mAU] | Area %  |
|--------|---------------|------|-------------|-------------|--------------|---------|
| 1      | 8.233         | VV   | 0.3023      | 446.51083   | 21.46840     | 1.9406  |
| 2      | 14.545        | VB   | 0.6611      | 2.25628e4   | 495.24957    | 98.0594 |

**(3bR,5S,6R,6aS)-1'-Benzyl-10-chloro-6-phenyl-3b,4,6,6a-tetrahydro-7H-spiro[benzo[b]dipyrrolo[1,2-d:2',3'-f][1,4]oxazocine-5,3'-indoline]-2',7-dione (6ar)**

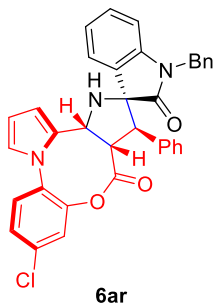

Prepared according to the procedure within 3 days as white solid (91.5 mg, 80% yield, dr > 20:1). mp 186.3 – 187.2 °C;  $[\alpha]_D^{18} = 53.63$  (c 0.29, CH<sub>2</sub>Cl<sub>2</sub>); <sup>1</sup>H NMR (400 MHz, CDCl<sub>3</sub>) δ 7.71 (d, *J* = 6.4 Hz, 1H), 7.47 – 7.38 (m, 2H), 7.32 (s, 1H), 7.22 – 7.03 (m, 8H), 6.98 (d, *J* = 7.6 Hz, 2H), 6.73 (s, 1H), 6.53 – 6.43 (m, 3H), 6.37 (d, *J* = 7.0 Hz, 1H), 6.33 – 6.29 (m, 1H), 5.34 (d, *J* = 10.6 Hz, 1H), 4.89 (d, *J* = 15.9 Hz, 1H), 4.44 (d, *J* = 10.4 Hz, 1H), 4.34 – 4.15 (m, 2H), 2.48 (s, 1H); <sup>13</sup>C NMR (151 MHz, CDCl<sub>3</sub>) δ 178.3, 169.0, 147.8, 143.1, 135.5, 134.8, 134.6, 133.9, 131.6, 129.7, 128.8, 128.6, 128.6, 128.2, 128.0, 127.8, 127.7, 127.3, 126.5, 123.9, 123.2, 122.9, 122.0, 110.1, 109.3, 107.3, 72.1, 55.7, 54.4, 50.1, 43.3; HRMS (ESI) *m/z* Calcd. for C<sub>35</sub>H<sub>27</sub>ClN<sub>3</sub>O<sub>3</sub><sup>+</sup> ([M+H]<sup>+</sup>) 572.1735, Found 572.1737; Enantiomeric excess was determined to be 91% (determined by HPLC using chiral AD-H column, hexane/2-propanol = 70/30, λ = 254 nm, 30 °C, 0.8 mL/min, *t*<sub>major</sub> = 16.4 min, *t*<sub>minor</sub> = 7.4 min).

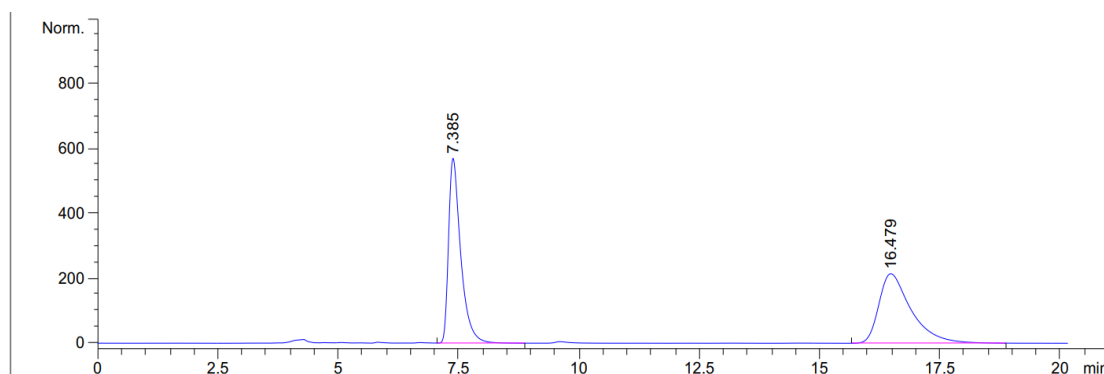

| Peak # | RetTime [min] | Type | Width [min] | Area mAU *s | Height [mAU] | Area %  |
|--------|---------------|------|-------------|-------------|--------------|---------|
| 1      | 7.385         | VB   | 0.2621      | 1.00165e4   | 569.28601    | 50.1122 |
| 2      | 16.479        | BB   | 0.6888      | 9971.70020  | 214.18037    | 49.8878 |

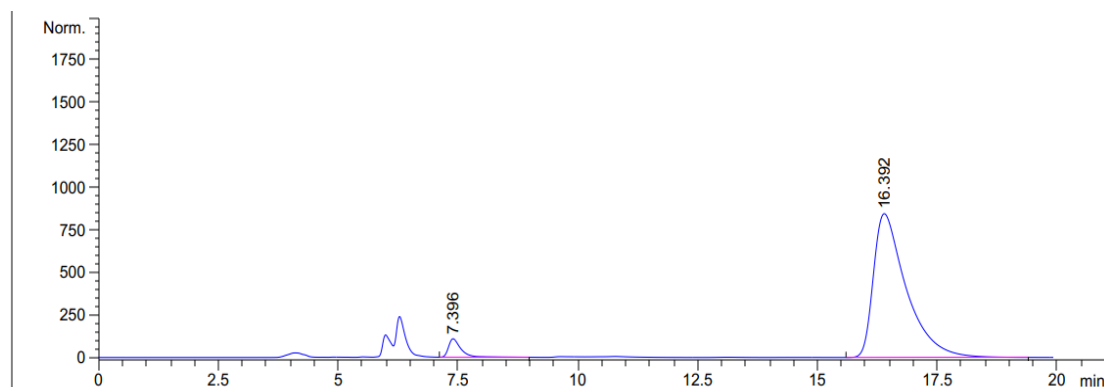

| Peak # | RetTime [min] | Type | Width [min] | Area mAU *s | Height [mAU] | Area %  |
|--------|---------------|------|-------------|-------------|--------------|---------|
| 1      | 7.396         | VB   | 0.2726      | 2023.16418  | 109.36850    | 4.7778  |
| 2      | 16.392        | PB   | 0.7029      | 4.03217e4   | 846.32373    | 95.2222 |

**(3bR,5S,6R,6aS)-1'-Benzyl-10-bromo-6-phenyl-3b,4,6,6a-tetrahydro-7H-spiro[benzo[b]dipyrrolo[1,2-d:2',3'-f][1,4]oxazocine-5,3'-indoline]-2',7-dione (6as)**

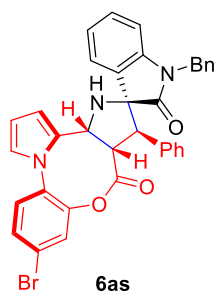

Prepared according to the procedure within 3 days as white solid (91.0 mg, 74% yield, dr > 20:1). mp 176.2 – 177.0 °C;  $[\alpha]_D^{18} = 54.32$  (c 0.67, CH<sub>2</sub>Cl<sub>2</sub>); <sup>1</sup>H NMR (600 MHz, CDCl<sub>3</sub>) δ 7.72 (dd, *J* = 7.1, 1.2 Hz, 1H), 7.57 (dd, *J* = 8.4, 2.1 Hz, 1H), 7.48 (d, *J* = 2.1 Hz, 1H), 7.38 (d, *J* = 8.4 Hz, 1H), 7.25 – 7.21 (m, 1H), 7.19 – 7.12 (m, 5H), 7.10 – 7.06 (m, 2H), 7.00 (d, *J* = 7.7 Hz, 2H), 6.76 – 6.72 (m, 1H), 6.52 – 6.45 (m, 3H), 6.39 (d, *J* = 7.2 Hz, 1H), 6.34 – 6.30 (m, 1H), 5.35 (d, *J* = 10.6 Hz, 1H), 4.91 (d, *J* = 16.0 Hz, 1H), 4.45 (d, *J* = 10.5 Hz, 1H), 4.30 (t, *J* = 10.5 Hz, 1H), 4.23 (d, *J* = 16.0 Hz, 1H), 2.40 (s, 1H); <sup>13</sup>C NMR (151 MHz, CDCl<sub>3</sub>) δ 178.3,

169.0, 147.9, 143.1, 134.8, 134.6, 133.9, 132.1, 130.6, 129.7, 129.1, 128.7, 128.6, 128.2, 128.0, 127.8, 127.3, 126.5, 125.8, 123.9, 123.2, 123.1, 121.9, 110.1, 109.4, 107.4, 72.1, 55.7, 54.4, 50.0, 43.3; HRMS (ESI)  $m/z$  Calcd. for  $C_{35}H_{27}BrN_3O_3^+$  ( $[M+H]^+$ ) 616.1230, Found 616.1234; Enantiomeric excess was determined to be 89% (determined by HPLC using chiral AD-H column, hexane/2-propanol = 70/30,  $\lambda$  = 254 nm, 30 °C, 0.8 mL/min,  $t_{major}$  = 17.3 min,  $t_{minor}$  = 7.5 min).

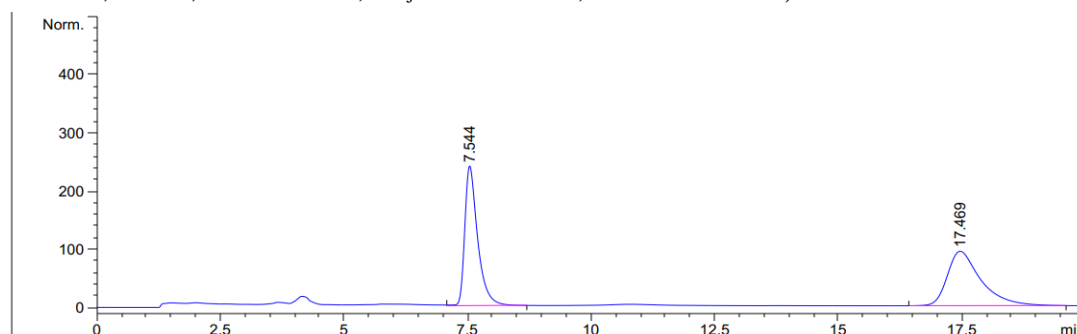

| Peak # | RetTime [min] | Type | Width [min] | Area mAU *s | Height [mAU] | Area %  |
|--------|---------------|------|-------------|-------------|--------------|---------|
| 1      | 7.544         | VB   | 0.2698      | 4355.20166  | 240.16383    | 49.5865 |
| 2      | 17.469        | BB   | 0.7034      | 4427.83203  | 93.59225     | 50.4135 |

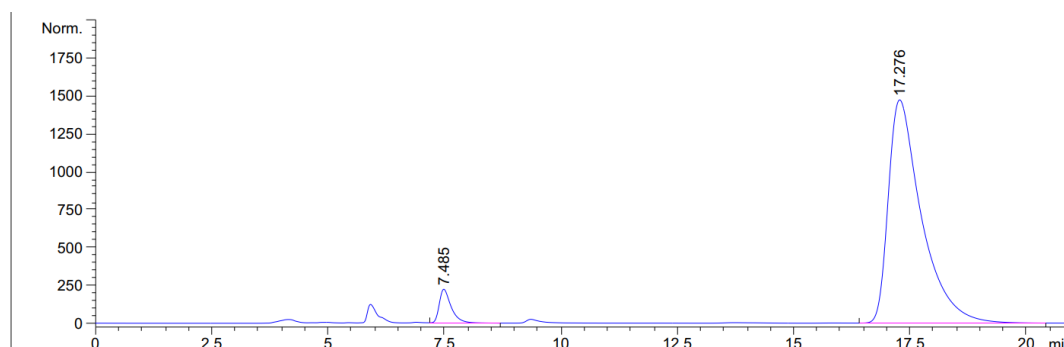

| Peak # | RetTime [min] | Type | Width [min] | Area mAU *s | Height [mAU] | Area %  |
|--------|---------------|------|-------------|-------------|--------------|---------|
| 1      | 7.485         | VB   | 0.2660      | 4002.57935  | 223.18607    | 5.2214  |
| 2      | 17.276        | VB   | 0.7281      | 7.26543e4   | 1469.78540   | 94.7786 |

**(3bR,5S,6R,6aS)-1'-Benzyl-5'-methyl-6-phenyl-3b,4,6,6a-tetrahydro-7H-spiro[benzo[b]dipyrrolo[1,2-d:2',3'-f][1,4]oxazocine-5,3'-indoline]-2',7-dione (6ba)**

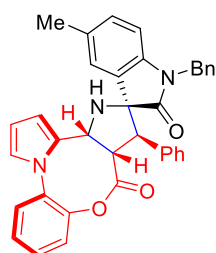

**6ba**

Prepared according to the procedure within 3 days as white solid (77.2 mg, 70% yield, dr > 20:1). mp 175.2 – 176.0 °C;  $[\alpha]_D^{18}$  = 71.15 (c 0.26,  $CH_2Cl_2$ );  $^1H$  NMR (600 MHz,  $CDCl_3$ )  $\delta$  7.56 – 7.49 (m, 3H), 7.45 – 7.41 (m, 1H), 7.32 – 7.28 (m, 1H), 7.23 – 7.18 (m, 1H), 7.14 – 7.09 (m, 3H), 7.08 – 7.03 (m, 2H), 6.98 (d,  $J$  = 7.6 Hz, 2H), 6.93 (d,  $J$  = 7.9 Hz, 1H), 6.80 – 6.76 (m, 1H), 6.48 – 6.43 (m,

3H), 6.34 – 6.30 (m, 1H), 6.25 (d,  $J = 7.9$  Hz, 1H), 5.35 (d,  $J = 10.6$  Hz, 1H), 4.86 (d,  $J = 16.0$  Hz, 1H), 4.45 (d,  $J = 10.3$  Hz, 1H), 4.27 (t,  $J = 10.5$  Hz, 1H), 4.18 (d,  $J = 16.0$  Hz, 1H), 2.41 (s, 3H);  $^{13}\text{C}$  NMR (151 MHz,  $\text{CDCl}_3$ )  $\delta$  178.2, 170.0, 147.5, 140.7, 135.0, 134.6, 134.3, 133.0, 132.9, 130.3, 129.9, 128.6, 128.5, 128.2, 128.2, 128.1, 127.7, 127.4, 127.1, 126.4, 124.6, 122.4, 122.0, 109.7, 109.0, 106.9, 72.2, 55.8, 54.7, 50.1, 43.3, 21.2; HRMS (ESI)  $m/z$  Calcd. for  $\text{C}_{36}\text{H}_{30}\text{N}_3\text{O}_3^+$  ( $[\text{M}+\text{H}]^+$ ) 552.2282, Found 552.2282; Enantiomeric excess was determined to be 91% (determined by HPLC using chiral AD-H column, hexane/2-propanol = 70/30,  $\lambda = 254$  nm, 30 °C, 0.8 mL/min,  $t_{\text{major}} = 14.3$  min,  $t_{\text{minor}} = 6.2$  min).

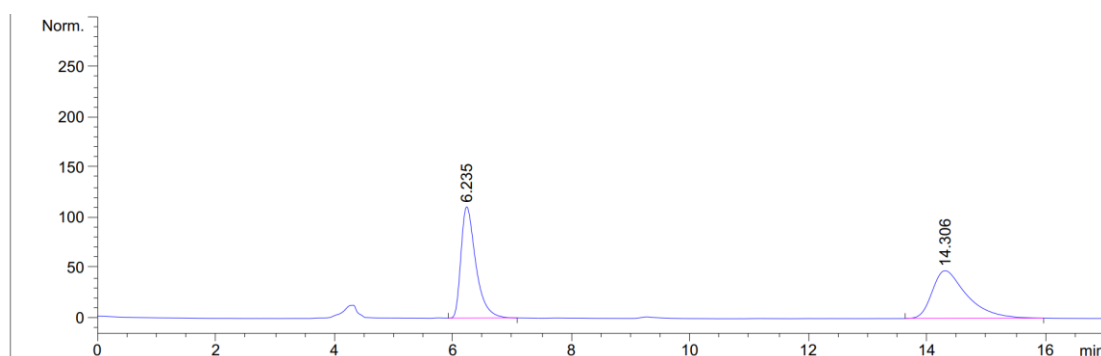

| Peak # | RetTime [min] | Type | Width [min] | Area mAU *s | Height [mAU] | Area %  |
|--------|---------------|------|-------------|-------------|--------------|---------|
| 1      | 6.235         | VB   | 0.2642      | 1931.32776  | 110.97221    | 49.8959 |
| 2      | 14.306        | BB   | 0.5976      | 1939.38428  | 47.60297     | 50.1041 |

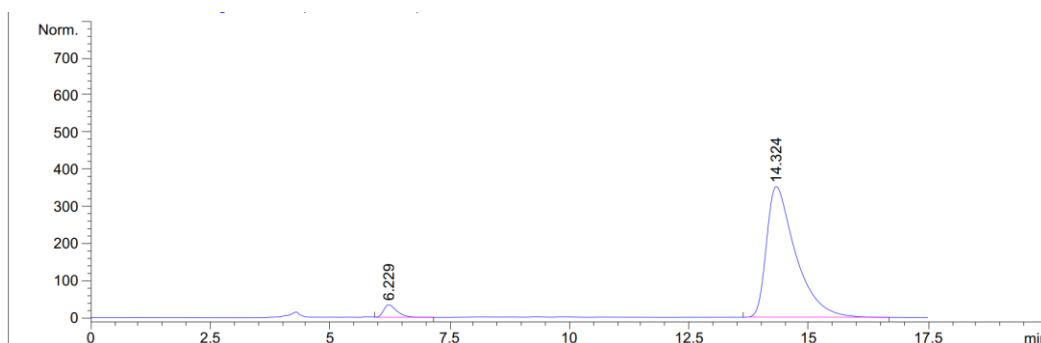

| Peak # | RetTime [min] | Type | Width [min] | Area mAU *s | Height [mAU] | Area %  |
|--------|---------------|------|-------------|-------------|--------------|---------|
| 1      | 6.229         | VB   | 0.2915      | 665.45862   | 34.13357     | 4.2568  |
| 2      | 14.324        | BB   | 0.6229      | 1.49673e4   | 352.94476    | 95.7432 |

**(3bR,5S,6R,6aS)-1'-Benzyl-5'-fluoro-6-phenyl-3b,4,6,6a-tetrahydro-7H-spiro[benzo[b]dipyrrolo[1,2-d:2',3'-f][1,4]oxazocine-5,3'-indoline]-2',7-dione (6ca)**

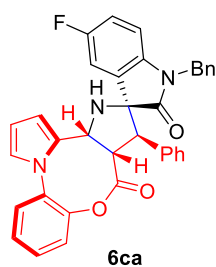

Prepared according to the procedure within 3 days as white solid (97.8 mg, 88% yield, dr > 20:1). mp 180.4 – 181.3 °C;  $[\alpha]_D^{18} = 60.07$  (*c* 0.62, CH<sub>2</sub>Cl<sub>2</sub>); <sup>1</sup>H NMR (600 MHz, CDCl<sub>3</sub>) δ 7.55 – 7.50 (m, 2H), 7.48 (dd, *J* = 7.6, 2.6 Hz, 1H), 7.46 – 7.42 (m, 1H), 7.31 (dd, *J* = 7.9, 1.0 Hz, 1H), 7.25 – 7.22 (m, 1H), 7.16 – 7.11 (m, 3H), 7.10 – 7.06 (m, 2H), 7.01 (d, *J* = 7.6 Hz, 2H), 6.85 – 6.80 (m, 1H), 6.79 – 6.75 (m, 1H), 6.49 – 6.41 (m, 3H), 6.36 – 6.30 (m, 1H), 6.27 (dd, *J* = 8.5, 4.0 Hz, 1H), 5.34 (d, *J* = 10.7 Hz, 1H), 4.89 (d, *J* = 16.0 Hz, 1H), 4.43 (d, *J* = 10.4 Hz, 1H), 4.28 (t, *J* = 10.6 Hz, 1H), 4.18 (d, *J* = 16.0 Hz, 1H), 2.48 (s, 1H); <sup>13</sup>C NMR (151 MHz, CDCl<sub>3</sub>) δ 178.2, 169.6, 159.7 (d, *J* = 243.1 Hz), 158.1, 147.4, 138.9, 134.5 (d, *J* = 3.0 Hz), 133.9, 132.9, 130.3, 130.2 (d, *J* = 7.6 Hz), 128.7, 128.6, 128.3, 128.0, 127.9, 127.5, 127.4, 126.4, 122.5, 122.0, 115.9 (d, *J* = 22.7 Hz), 112.0 (d, *J* = 25.7 Hz), 110.0 (d, *J* = 7.6 Hz), 109.8, 107.1, 72.2, 55.9, 54.5, 49.8, 43.4; <sup>19</sup>F NMR (565 MHz, CDCl<sub>3</sub>) δ -119.09; HRMS (ESI) *m/z* Calcd. for C<sub>35</sub>H<sub>27</sub>FN<sub>3</sub>O<sub>3</sub><sup>+</sup> ([M+H]<sup>+</sup>) 556.2031, Found 556.2032; Enantiomeric excess was determined to be 91% (determined by HPLC using chiral AD-H column, hexane/2-propanol = 70/30, λ = 254 nm, 30 °C, 0.8 mL/min, *t*<sub>major</sub> = 13.3 min, *t*<sub>minor</sub> = 6.8 min).

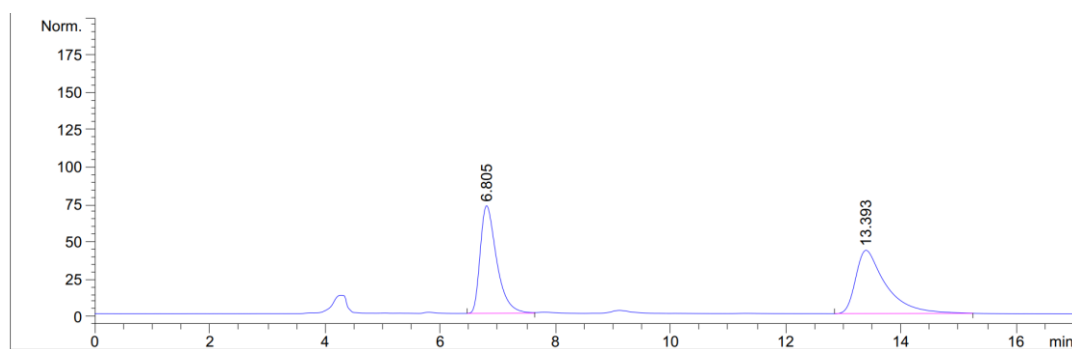

| Peak # | RetTime [min] | Type | Width [min] | Area mAU *s | Height [mAU] | Area %  |
|--------|---------------|------|-------------|-------------|--------------|---------|
| 1      | 6.805         | BB   | 0.3020      | 1430.32190  | 71.90580     | 48.1349 |
| 2      | 13.393        | PB   | 0.5283      | 1541.16736  | 42.31447     | 51.8651 |

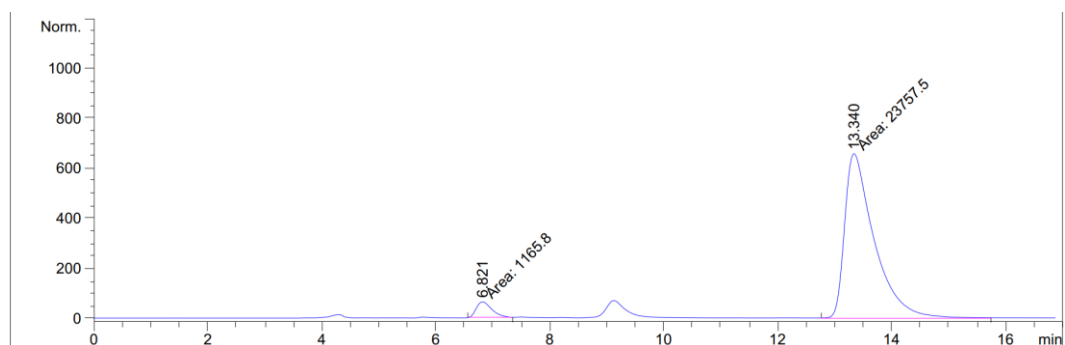

| Peak # | RetTime [min] | Type | Width [min] | Area mAU *s | Height [mAU] | Area %  |
|--------|---------------|------|-------------|-------------|--------------|---------|
| 1      | 6.821         | MM   | 0.3121      | 1165.80261  | 62.24791     | 4.6776  |
| 2      | 13.340        | MM   | 0.6024      | 2.37575e4   | 657.32379    | 95.3224 |

**(3bR,5S,6R,6aS)-1'-Methyl-6-phenyl-3b,4,6,6a-tetrahydro-7H-spiro[benzo[b]dipyrrolo[1,2-d:2',3'-f][1,4]oxazocine-5,3'-indoline]-2',7-dione (6da)**

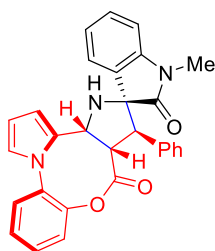

**6da**

Prepared according to the procedure within 2.5 days as white solid (81.2 mg, 88% yield, dr > 20:1). mp 166.3 – 167.2 °C;  $[\alpha]_D^{18} = 16.32$  (*c* 0.24, CH<sub>2</sub>Cl<sub>2</sub>); <sup>1</sup>H NMR (600 MHz, CDCl<sub>3</sub>) δ 7.67 (d, *J* = 7.1 Hz, 1H), 7.54 – 7.48 (m, 2H), 7.45 – 7.40 (m, 1H), 7.30 – 7.24 (m, 2H), 7.20 – 7.15 (m, 1H), 7.12 – 7.03 (m, 3H), 6.92 (d, *J* = 7.3 Hz, 2H), 6.78 – 6.73 (m, 1H), 6.55 (d, *J* = 7.7 Hz, 1H), 6.46 – 6.40 (m, 1H), 6.34 – 6.29 (m, 1H), 5.31 (d, *J* = 10.7 Hz, 1H), 4.34 (d, *J* = 10.5 Hz, 1H), 4.17 (t, *J* = 10.6 Hz, 1H), 2.75 (s, 3H), 2.16 (s, 1H); <sup>13</sup>C NMR (151 MHz, CDCl<sub>3</sub>) δ 178.4, 169.8, 147.5, 143.7, 134.8, 134.1, 132.9, 130.3, 129.6, 128.2, 128.1, 128.0, 128.0, 127.6, 127.4, 123.7, 123.1, 122.5, 121.9, 109.7, 108.0, 106.9, 72.2, 56.2, 54.7, 50.1, 25.4; HRMS (ESI) *m/z* Calcd. for C<sub>29</sub>H<sub>24</sub>N<sub>3</sub>O<sub>3</sub><sup>+</sup> ([M+H]<sup>+</sup>) 462.1812, Found 462.1812; Enantiomeric excess was determined to be 91% (determined by HPLC using chiral AD-H column, hexane/2-propanol = 70/30, λ = 254 nm, 30 °C, 0.8 mL/min, *t*<sub>major</sub> = 14.8 min, *t*<sub>minor</sub> = 7.7 min).

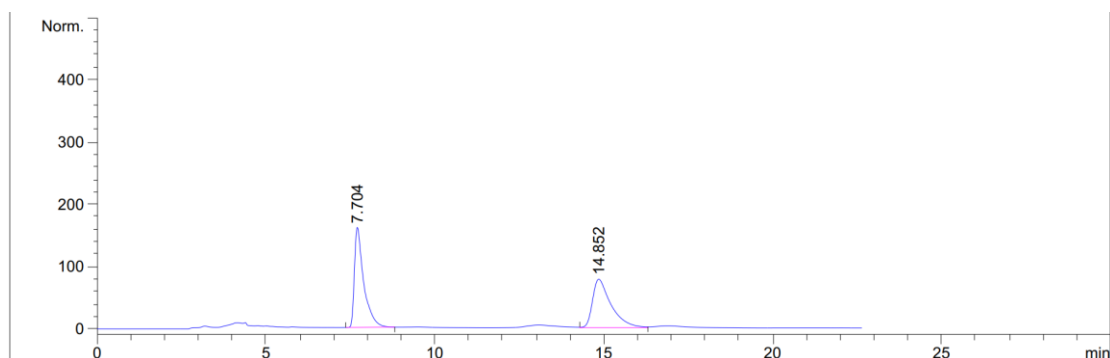



| Peak # | RetTime [min] | Type | Width [min] | Area mAU *s | Height [mAU] | Area %  |
|--------|---------------|------|-------------|-------------|--------------|---------|
| 1      | 7.704         | BB   | 0.2744      | 3072.86816  | 160.43619    | 50.7891 |
| 2      | 14.852        | VB   | 0.5488      | 2977.38892  | 77.98033     | 49.2109 |

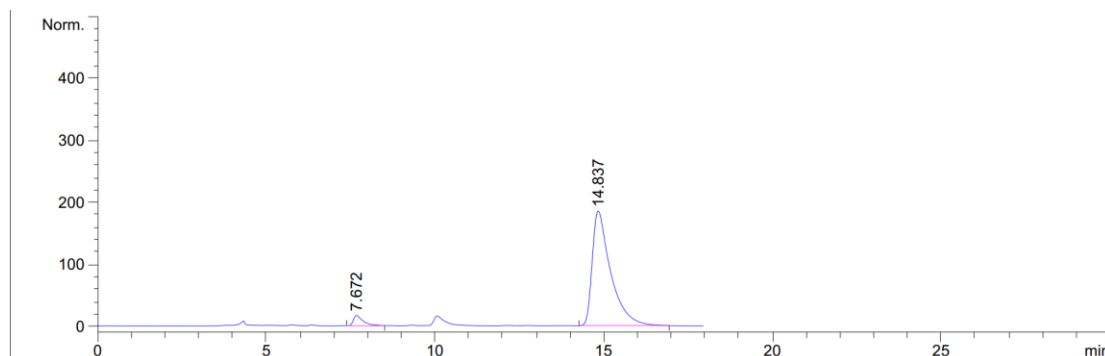

| Peak # | RetTime [min] | Type | Width [min] | Area mAU *s | Height [mAU] | Area %  |
|--------|---------------|------|-------------|-------------|--------------|---------|
| 1      | 7.672         | VB   | 0.2905      | 339.37653   | 16.63311     | 4.6322  |
| 2      | 14.837        | PB   | 0.5453      | 6987.04102  | 184.44702    | 95.3678 |

### Gram scale synthesis of compound 4ad

Enantiomeric excess was determined to be 98% (determined by HPLC using chiral AD-H column, hexane/2-propanol = 70/30,  $\lambda = 254$  nm, 30 °C, 0.8 mL/min,  $t_{\text{major}} = 8.2$  min,  $t_{\text{minor}} = 5.6$  min)

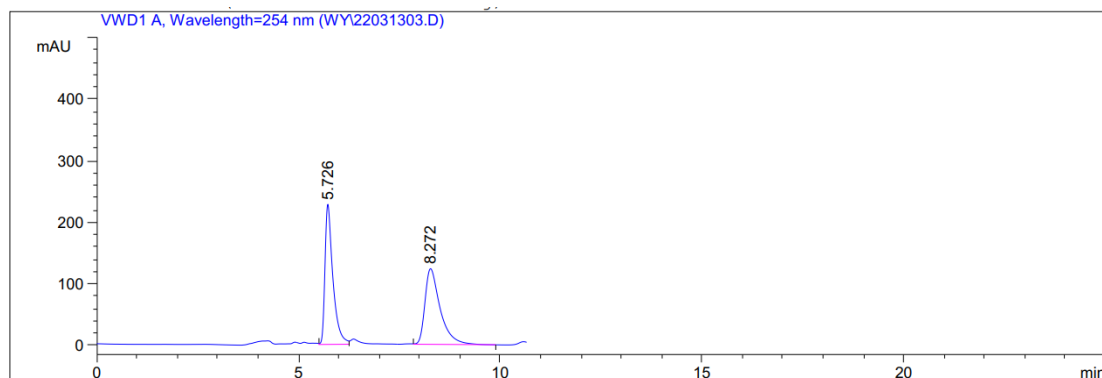

| Peak # | RetTime [min] | Type | Width [min] | Area mAU *s | Height [mAU] | Area %  |
|--------|---------------|------|-------------|-------------|--------------|---------|
| 1      | 5.726         | VV   | 0.1994      | 3124.04541  | 227.68483    | 49.1177 |
| 2      | 8.272         | VB   | 0.3911      | 3236.28101  | 123.11414    | 50.8823 |

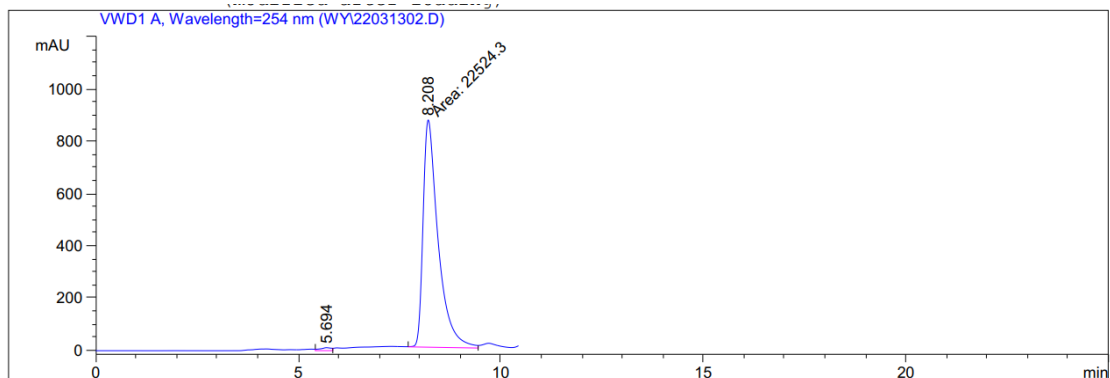

| Peak # | RetTime [min] | Type | Width [min] | Area mAU *s | Height [mAU] | Area %  |
|--------|---------------|------|-------------|-------------|--------------|---------|
| 1      | 5.694         | VV   | 0.2682      | 225.44318   | 11.42075     | 0.9910  |
| 2      | 8.208         | MM   | 0.4317      | 2.25243e4   | 869.60437    | 99.0090 |

### The scale-up synthesis of compound 6am

Enantiomeric excess was determined to be 96% (determined by HPLC using chiral AD-H column, hexane/2-propanol = 70/30,  $\lambda = 254$  nm, 30 °C, 0.8 mL/min,  $t_{\text{major}} = 16.7$  min,  $t_{\text{minor}} = 9.2$  min).

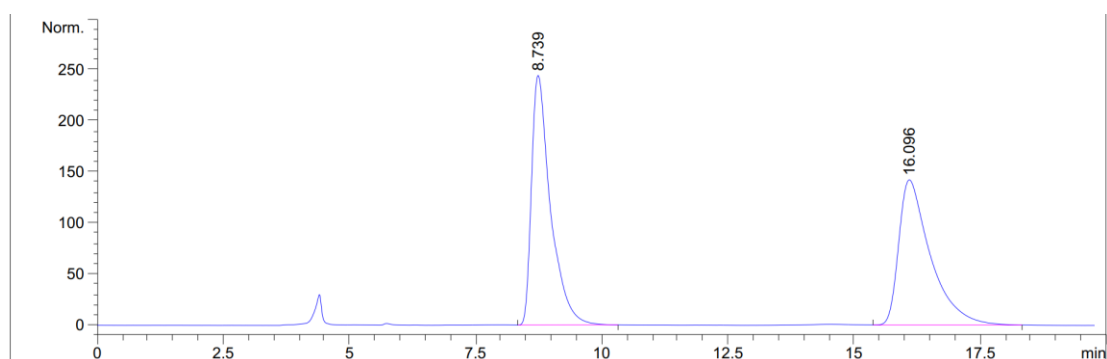

| Peak # | RetTime [min] | Type | Width [min] | Area mAU *s | Height [mAU] | Area %  |
|--------|---------------|------|-------------|-------------|--------------|---------|
| 1      | 8.739         | PB   | 0.3870      | 6400.20459  | 244.46620    | 50.6994 |
| 2      | 16.096        | VB   | 0.6384      | 6223.61572  | 142.29416    | 49.3006 |

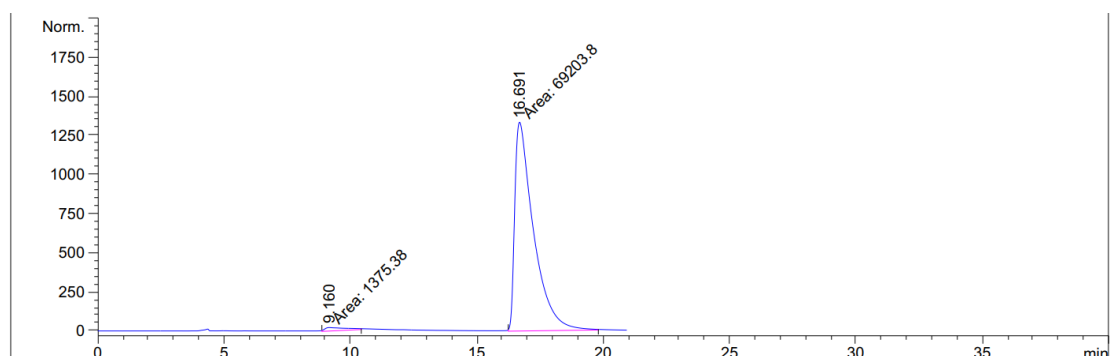

| Peak # | RetTime [min] | Type | Width [min] | Area mAU *s | Height [mAU] | Area %  |
|--------|---------------|------|-------------|-------------|--------------|---------|
| 1      | 9.160         | MM   | 0.9763      | 1375.37964  | 23.47963     | 1.9487  |
| 2      | 16.691        | MM   | 0.8631      | 6.92038e4   | 1336.29236   | 98.0513 |

### The scale-up synthesis of compound 6as

Enantiomeric excess was determined to be 87% (determined by HPLC using chiral AD-H column, hexane/2-propanol = 70/30,  $\lambda = 254$  nm, 30 °C, 0.8 mL/min,  $t_{\text{major}} = 17.2$  min,  $t_{\text{minor}} = 7.5$  min).

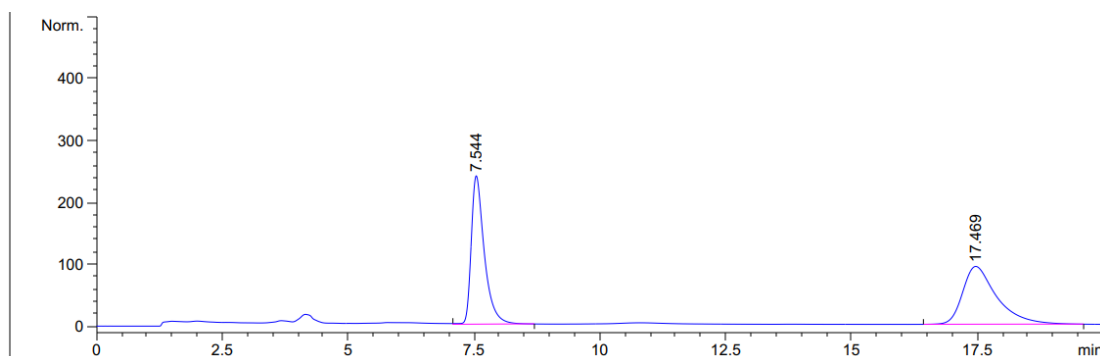

| Peak # | RetTime [min] | Type | Width [min] | Area mAU *s | Height [mAU] | Area %  |
|--------|---------------|------|-------------|-------------|--------------|---------|
| 1      | 7.544         | VB   | 0.2698      | 4355.20166  | 240.16383    | 49.5865 |
| 2      | 17.469        | BB   | 0.7034      | 4427.83203  | 93.59225     | 50.4135 |

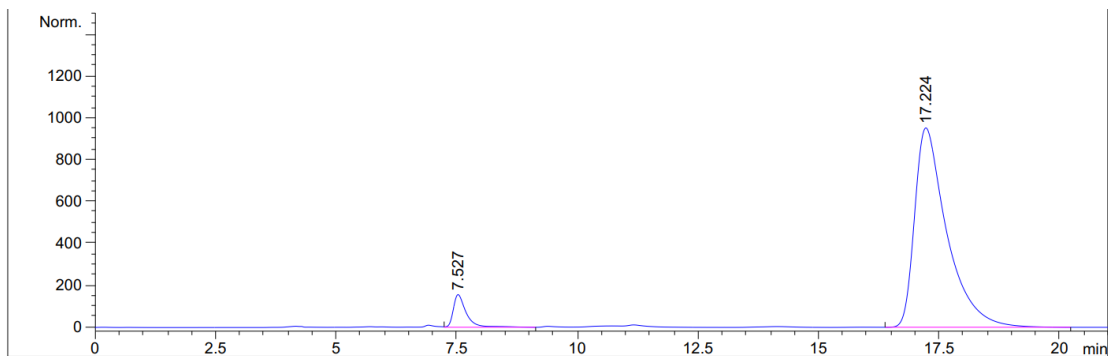

| Peak # | RetTime [min] | Type | Width [min] | Area mAU *s | Height [mAU] | Area %  |
|--------|---------------|------|-------------|-------------|--------------|---------|
| 1      | 7.527         | VV   | 0.2819      | 3009.85864  | 157.01492    | 6.3517  |
| 2      | 17.224        | VB   | 0.6822      | 4.43767e4   | 954.44525    | 93.6483 |

**(6S,7R,7aS)-1'-Benzyl-7-(m-tolyl)-7,7a-dihydro-8H-spiro[dibenzo[5,6:7,8]oxocino[4,3-b]pyrrole-6,3'-indoline]-2',8-dione (7)**

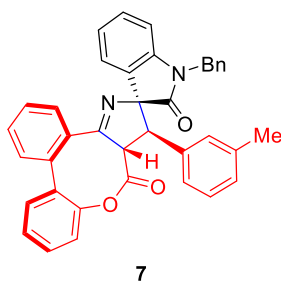

Prepared according to the procedure within 10 h as white solid (100.92 mg, 90% yield, dr > 20:1); mp 220.2 – 220.9 °C;  $[\alpha]_D^{18} = 148.74$  (c 0.28, CH<sub>2</sub>Cl<sub>2</sub>); <sup>1</sup>H NMR (400 MHz, CDCl<sub>3</sub>) δ 8.03 (d, *J* = 7.5 Hz, 1H), 7.68 – 7.64 (m, 1H), 7.62 – 7.54 (m, 2H), 7.51 – 7.48 (m, 2H), 7.35 (d, *J* = 7.6 Hz, 1H), 7.29 – 7.27 (m, 1H), 7.22 (dd, *J* = 5.5, 3.2 Hz, 2H), 7.15 – 7.01 (m, 6H), 6.67 (d, *J* = 7.2 Hz, 1H), 6.61 (s, 1H), 6.52 – 6.45 (m, 1H), 6.41 (d, *J* = 7.5 Hz, 2H), 5.38 (d, *J* = 11.2 Hz, 1H), 4.97 (d, *J* = 16.0 Hz, 1H), 4.78 (d, *J* = 11.2 Hz, 1H), 4.17 (d, *J* = 16.0 Hz, 1H), 2.12 (s, 3H); <sup>13</sup>C NMR (101 MHz, CDCl<sub>3</sub>) δ 174.8, 173.3, 168.6, 148.9, 143.5, 138.2, 136.3, 134.8, 134.0, 133.6, 133.0, 132.6, 131.9, 131.6, 130.6, 129.9, 129.6, 129.3, 128.9, 128.7, 128.6, 128.5, 127.8, 127.2, 126.3, 124.5, 124.4, 123.5, 120.5, 109.4, 83.6, 57.7, 56.3, 43.7, 21.4; HRMS (ESI) *m/z* Calcd. for C<sub>38</sub>H<sub>29</sub>N<sub>2</sub>O<sub>3</sub><sup>+</sup> ([M+H]<sup>+</sup>) 561.2173, Found 561.2173; Enantiomeric excess was determined to be 98% (determined by HPLC using chiral AD-H column, hexane/2-propanol = 70/30, λ = 254 nm, 30 °C, 0.8 mL/min, *t*<sub>major</sub> = 8.9 min, *t*<sub>minor</sub> = 6.3 min).

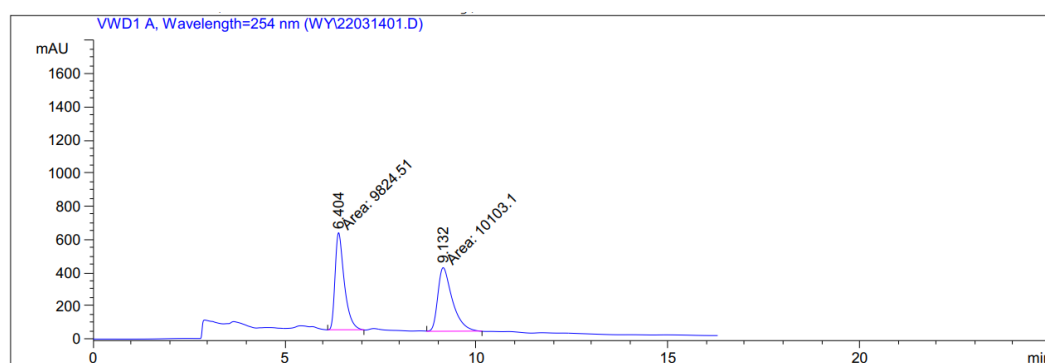

| Peak # | RetTime [min] | Type | Width [min] | Area mAU *s | Height [mAU] | Area %  |
|--------|---------------|------|-------------|-------------|--------------|---------|
| 1      | 6.404         | MM   | 0.2795      | 9824.50781  | 585.83295    | 49.3010 |
| 2      | 9.132         | MM   | 0.4390      | 1.01031e4   | 383.54129    | 50.6990 |

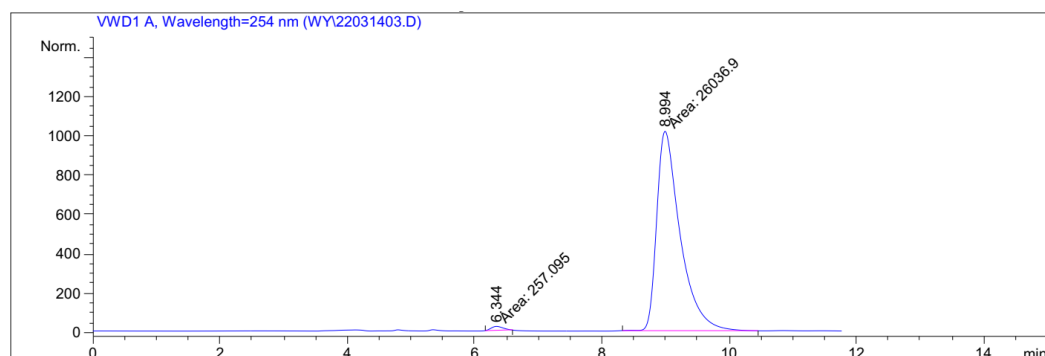

| Peak # | RetTime [min] | Type | Width [min] | Area mAU *s | Height [mAU] | Area %  |
|--------|---------------|------|-------------|-------------|--------------|---------|
| 1      | 6.344         | MM   | 0.2131      | 257.09460   | 20.10881     | 0.9778  |
| 2      | 8.994         | MM   | 0.4277      | 2.60369e4   | 1014.50995   | 99.0222 |

**(S)-1'-Benzyl-7-(m-tolyl)-8H-spiro[dibenzo[5,6:7,8]oxocino[4,3-b]pyrrole-6,3'-indoline]-2',8-dione (8)**

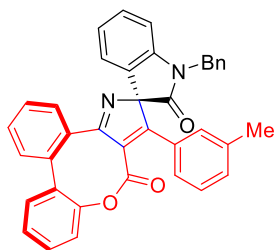

8

Prepared according to the procedure within 10 h as white solid (106.14 mg, 95% yield, dr = 1.6:1); mp 224.6 – 225.7 °C;  $[\alpha]_D^{18} = 14.56$  (c 0.47, CH<sub>2</sub>Cl<sub>2</sub>); <sup>1</sup>H NMR (400 MHz, CDCl<sub>3</sub>) δ 7.78 – 7.73 (m, 1H), 7.64 – 7.60 (m, 1H), 7.55 – 7.33 (m, 5H), 7.32 – 7.26 (m, 1H), 7.24 – 7.21 (m, 2H), 7.19 – 7.03 (m, 6H), 6.96 (s, 1H), 6.89 – 6.81 (m, 1H), 6.80 – 6.64 (m, 2H), 5.59 (d, *J* = 7.3 Hz, 1H), 5.17 (d, *J* = 15.7 Hz, 1H), 4.70 (d, *J* = 15.7

Hz, 1H), 2.16 (s, 3H); <sup>13</sup>C NMR (101 MHz, CDCl<sub>3</sub>) δ 175.1, 169.3, 165.3, 163.2, 148.7, 144.0, 138.6, 136.0, 135.0, 133.7, 133.4, 133.1, 132.5, 131.3, 131.2, 131.2, 130.0, 129.9, 129.1, 128.9, 128.7, 128.5, 128.2, 127.8, 127.4, 127.3, 124.7, 123.3, 123.0, 122.8, 122.0, 110.1, 89.3, 44.6, 21.5; HRMS (ESI) *m/z* Calcd. for C<sub>38</sub>H<sub>27</sub>N<sub>2</sub>O<sub>3</sub><sup>+</sup> ([M+H]<sup>+</sup>) 559.2016, Found 559.2009; Enantiomeric excess was determined to be 99%, 99% (determined by HPLC using chiral AD-H column, hexane/2-propanol = 70/30, λ = 254 nm, 30 °C, 0.8 mL/min, *t*<sub>major</sub> = 11.8 min, *t*<sub>minor</sub> = 7.6 min, *t*<sub>major</sub> = 17.9 min, *t*<sub>minor</sub> = 21.1 min).

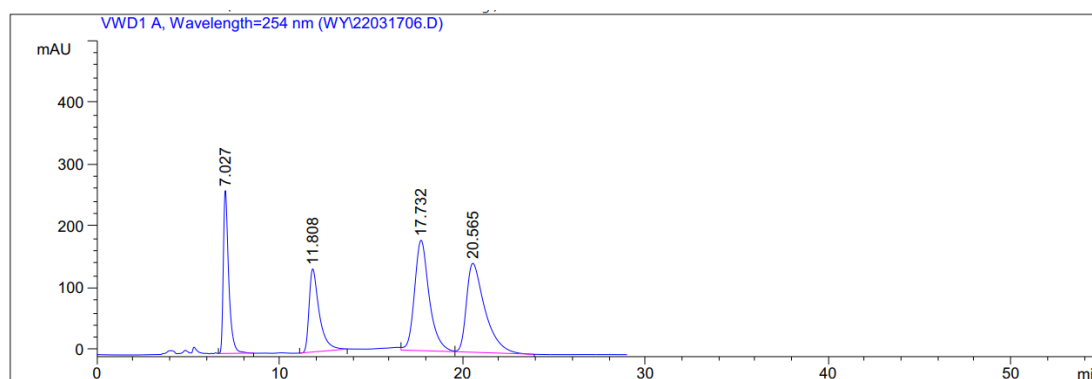

| Peak # | RetTime [min] | Type | Width [min] | Area mAU *s | Height [mAU] | Area %  |
|--------|---------------|------|-------------|-------------|--------------|---------|
| 1      | 7.027         | VB   | 0.3047      | 5398.82080  | 263.36807    | 17.5747 |
| 2      | 11.808        | PB   | 0.5709      | 5217.59375  | 134.38542    | 16.9848 |
| 3      | 17.732        | VV   | 0.8393      | 9996.55664  | 178.61017    | 32.5417 |
| 4      | 20.565        | VP   | 1.0402      | 1.01063e4   | 143.99014    | 32.8988 |

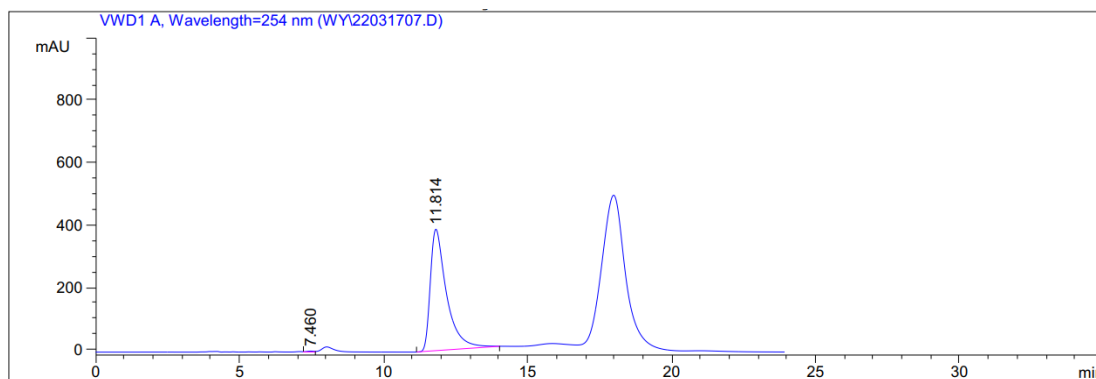

| Peak # | RetTime [min] | Type | Width [min] | Area mAU*s | Height [mAU] | Area %  |
|--------|---------------|------|-------------|------------|--------------|---------|
| 1      | 7.460         | VV   | 0.2743      | 53.13895   | 2.92853      | 0.3454  |
| 2      | 11.814        | PB   | 0.5784      | 1.53310e4  | 389.68433    | 99.6546 |

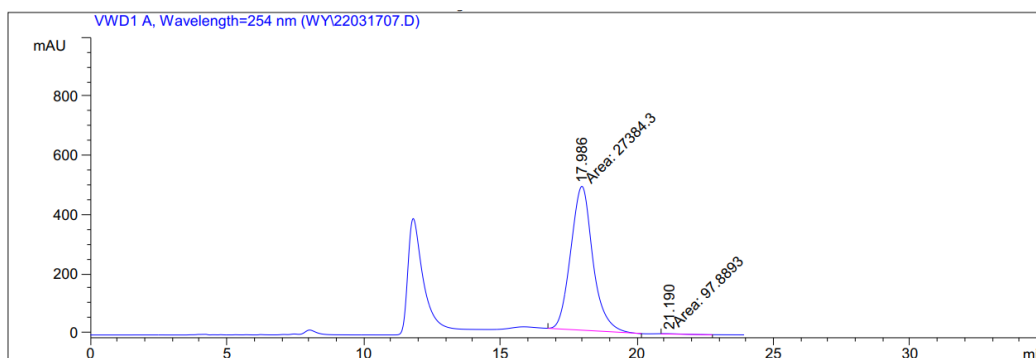

| Peak # | RetTime [min] | Type | Width [min] | Area mAU*s | Height [mAU] | Area %  |
|--------|---------------|------|-------------|------------|--------------|---------|
| 1      | 17.986        | MM   | 0.9371      | 2.73843e4  | 487.04340    | 99.6438 |
| 2      | 21.190        | MM   | 1.2339      | 97.88932   | 1.32217      | 0.3562  |

**(3bR,5S,6R,6aS)-1'-Benzyl-2,10-dibromo-6-phenyl-3b,4,6,6a-tetrahydro-7H-spiro[benzo[b]dipyrrolo[1,2-d:2',3'-f][1,4]oxazocine-5,3'-indoline]-2',7-dione (9)**

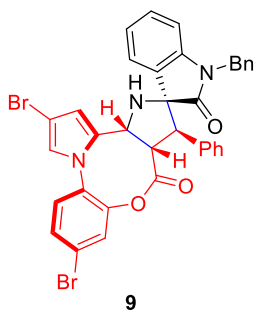

Prepared according to the procedure within 12 h as white solid (62.6 mg, 90% yield, dr > 20:1). mp 228.2 – 229.3 °C;  $[\alpha]_D^{18} = 42.80$  (c 0.26, CH<sub>2</sub>Cl<sub>2</sub>); <sup>1</sup>H NMR (600 MHz, CDCl<sub>3</sub>) δ 7.69 (dd, *J* = 7.1, 1.3 Hz, 1H), 7.61 (dd, *J* = 8.4, 2.1 Hz, 1H), 7.51 (d, *J* = 2.1 Hz, 1H), 7.37 (d, *J* = 8.4 Hz, 1H), 7.24 – 7.20 (m, 1H), 7.18 – 7.10 (m, 5H), 7.09 – 7.05 (m, 2H), 6.97 (d, *J* = 7.4 Hz, 2H), 6.50 – 6.44 (m, 3H), 6.38 – 6.36 (m, 1H), 6.34 (d, *J* = 3.7 Hz,

1H), 5.26 (d, *J* = 10.3 Hz, 1H), 4.88 (d, *J* = 16.0 Hz, 1H), 4.40 (d, *J* = 10.6 Hz, 1H), 4.28 – 4.18 (m, 2H), 2.43 (s, 1H); <sup>13</sup>C NMR (101 MHz, CDCl<sub>3</sub>) δ 178.4, 168.7, 148.3, 143.1, 136.2, 134.7, 133.6, 131.2, 130.5, 129.7, 128.7, 128.6, 128.2, 127.9, 127.8,

127.3, 126.4, 126.0, 124.0, 124.0, 123.3, 112.4, 109.4, 108.0, 102.2, 71.9, 55.3, 54.7, 50.2, 43.3; HRMS (ESI)  $m/z$  Calcd. for  $C_{35}H_{26}Br_2N_3O_3^+$  ( $[M+H]^+$ ) 694.0335, Found 694.0339; Enantiomeric excess was determined to be 87% (determined by HPLC using chiral AD-H column, hexane/2-propanol = 70/30,  $\lambda = 254$  nm, 30 °C, 0.8 mL/min,  $t_{major} = 10.7$  min,  $t_{minor} = 7.6$  min).

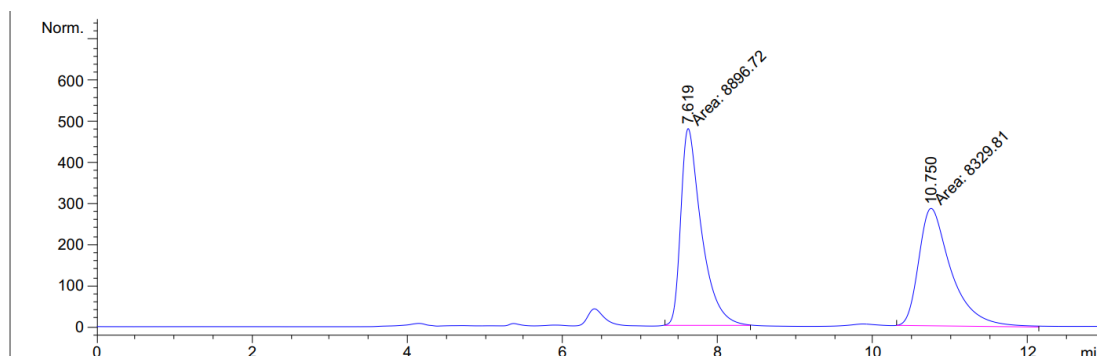

| Peak # | RetTime [min] | Type | Width [min] | Area mAU *s | Height [mAU] | Area %  |
|--------|---------------|------|-------------|-------------|--------------|---------|
| 1      | 7.619         | MM   | 0.3088      | 8896.72266  | 480.18582    | 51.6455 |
| 2      | 10.750        | MM   | 0.4846      | 8329.80664  | 286.48193    | 48.3545 |

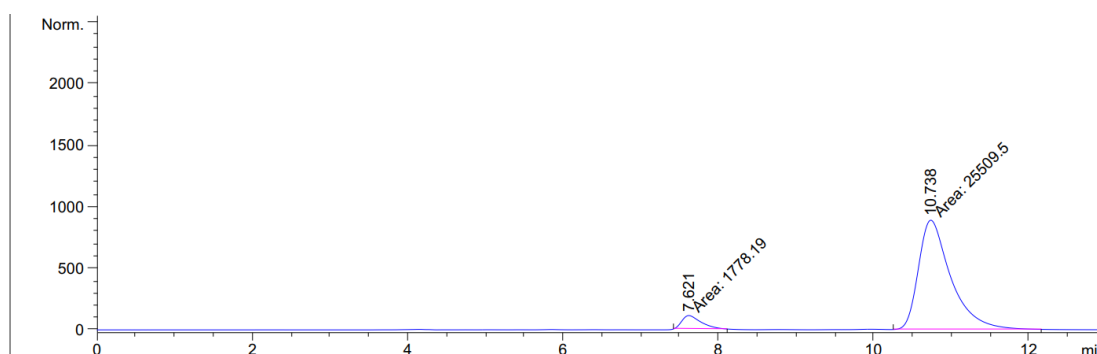

| Peak # | RetTime [min] | Type | Width [min] | Area mAU *s | Height [mAU] | Area %  |
|--------|---------------|------|-------------|-------------|--------------|---------|
| 1      | 7.621         | MM   | 0.2792      | 1778.18542  | 106.15471    | 6.5164  |
| 2      | 10.738        | MM   | 0.4805      | 2.55095e4   | 884.77563    | 93.4836 |

**(3bR,5S,6R,6aS)-1'-Benzyl-6,10-diphenyl-3b,4,6,6a-tetrahydro-7H-spiro[benzo[b]dipyrrolo[1,2-d:2',3'-f][1,4]oxazocine-5,3'-indoline]-2',7-dione (10)**

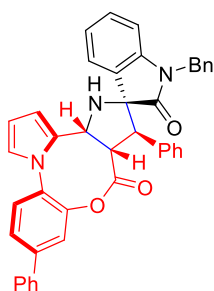

Prepared according to the procedure within 8 h as white solid (55.2 mg, 90% yield, dr > 20:1). mp 245.4 – 246.2 °C;  $[\alpha]_D^{18} = 50.88$  ( $c$  0.23,  $CH_2Cl_2$ );  $^1H$  NMR (400 MHz,  $CDCl_3$ )  $\delta$  7.77 (dd,  $J = 7.1, 1.4$  Hz, 1H), 7.71 – 7.65 (m, 3H), 7.62 – 7.51 (m, 4H), 7.50 – 7.44 (m, 1H), 7.26 – 7.06 (m, 8H), 7.02 (d,  $J = 7.4$  Hz, 2H), 6.86 – 6.80 (m,

1H), 6.53 – 6.46 (m, 3H), 6.42 – 6.34 (m, 2H), 5.46 (d,  $J = 10.5$  Hz, 1H), 4.92 (d,  $J = 16.0$  Hz, 1H), 4.53 (d,  $J = 10.4$  Hz, 1H), 4.39 (t,  $J = 10.5$  Hz, 1H), 4.23 (d,  $J = 16.0$  Hz, 1H), 2.52 (s, 1H);  $^{13}\text{C}$  NMR (151 MHz,  $\text{CDCl}_3$ )  $\delta$  178.4, 169.8, 147.6, 143.7, 143.1, 138.9, 134.9, 134.7, 134.2, 131.7, 129.6, 129.1, 128.6, 128.5, 128.4, 128.2, 128.2, 127.7, 127.3, 127.2, 126.5, 125.9, 123.9, 123.2, 122.1, 120.8, 109.8, 109.3, 107.1, 72.1, 55.9, 54.7, 50.0, 43.3; HRMS (ESI)  $m/z$  Calcd. for  $\text{C}_{41}\text{H}_{32}\text{N}_3\text{O}_3^+$  ( $[\text{M}+\text{H}]^+$ ) 614.2438, Found 614.2437; Enantiomeric excess was determined to be 87% (determined by HPLC using chiral AD-H column, hexane/2-propanol = 70/30,  $\lambda = 254$  nm, 30 °C, 0.8 mL/min,  $t_{\text{major}} = 8.9$  min,  $t_{\text{minor}} = 27.4$  min).

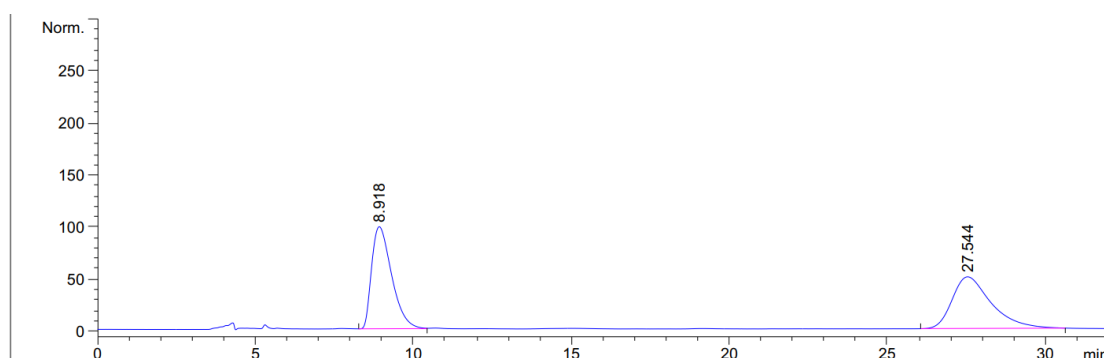

| Peak # | RetTime [min] | Type | Width [min] | Area mAU *s | Height [mAU] | Area %  |
|--------|---------------|------|-------------|-------------|--------------|---------|
| 1      | 8.918         | BB   | 0.6828      | 4335.16016  | 98.13214     | 50.3241 |
| 2      | 27.544        | BB   | 1.2577      | 4279.32617  | 49.70784     | 49.6759 |

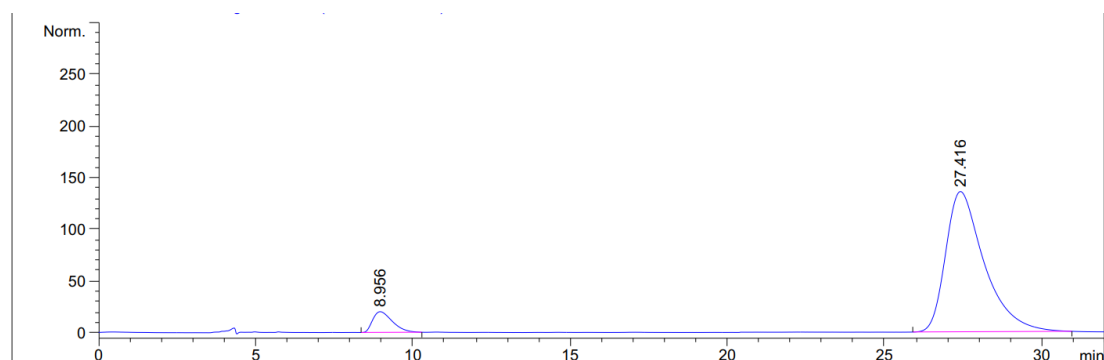

| Peak # | RetTime [min] | Type | Width [min] | Area mAU *s | Height [mAU] | Area %  |
|--------|---------------|------|-------------|-------------|--------------|---------|
| 1      | 8.956         | PB   | 0.6384      | 875.26666   | 20.06952     | 7.0056  |
| 2      | 27.416        | BB   | 1.2575      | 1.16185e4   | 135.77116    | 92.9944 |

### Compound 11 to 4aa

Enantiomeric excess was determined to be 75% (determined by HPLC using chiral AD-H column, hexane/2-propanol = 80/20,  $\lambda = 254$  nm, 30 °C, 0.8 mL/min,  $t_{\text{major}} =$



19.3 min,  $t_{\text{minor}} = 8.0$  min).

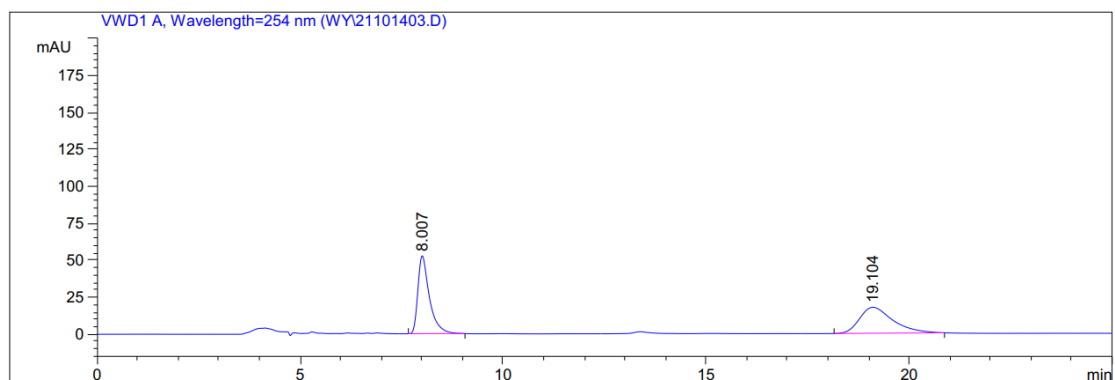

| Peak # | RetTime [min] | Type | Width [min] | Area mAU *s | Height [mAU] | Area %  |
|--------|---------------|------|-------------|-------------|--------------|---------|
| 1      | 8.007         | BB   | 0.2923      | 1043.10059  | 52.64264     | 50.8070 |
| 2      | 19.104        | BB   | 0.8400      | 1009.96289  | 17.63408     | 49.1930 |

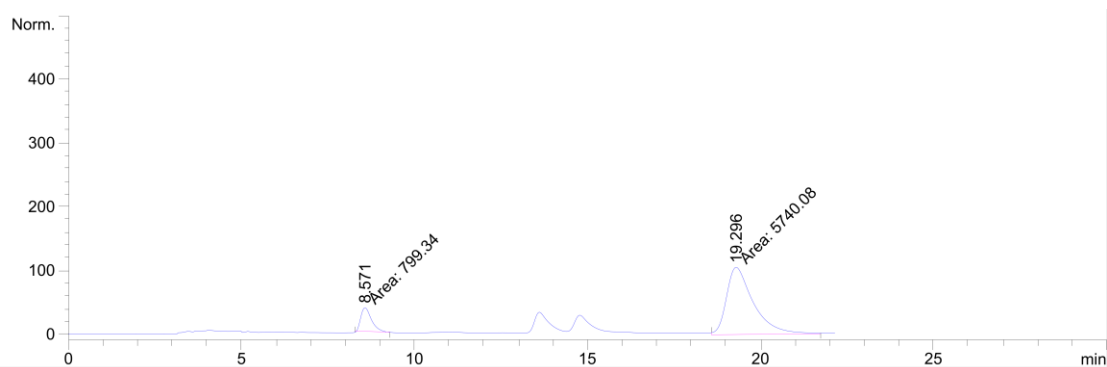

| Peak # | RetTime [min] | Type | Width [min] | Area mAU *s | Height [mAU] | Area %  |
|--------|---------------|------|-------------|-------------|--------------|---------|
| 1      | 8.571         | MM   | 0.3574      | 799.34033   | 37.27414     | 12.2234 |
| 2      | 19.296        | MM   | 0.9075      | 5740.08350  | 105.41896    | 87.7766 |

## 6. References

- [1] The synthesis of 3-amino oxindole hydrochloride, see: W.-B. Chen, Z.-J. Wu, J. Hu, L.-F. Cun, X.-M. Zhang, W.-C. Yuan, *Org. Lett.* **2011**, *13*, 2472.
- [2] T. Yang, X.-C. Guo, Q. Yin, X.-M. Zhang. *Chem. Sci.* **2019**, *10*, 2473-2477.
- [3] L. Fu, S. Li, Z. Cai, Y. Ding, X.-Q. Guo, L.-P. Zhou, D. Yuan, Q.-F. Sun, G. Li, *Nat. Catal.* **2018**, *1*, 469-478.
- [4] K. Grudzień, B. Trzaskowski, M. Smoleń, R. Gajda, K. Woźniak, K. Grela, *Dalton Trans.* **2017**, *46*, 11790-11799.

## 7. $^1\text{H}$ NMR and $^{13}\text{C}$ NMR spectra

3a

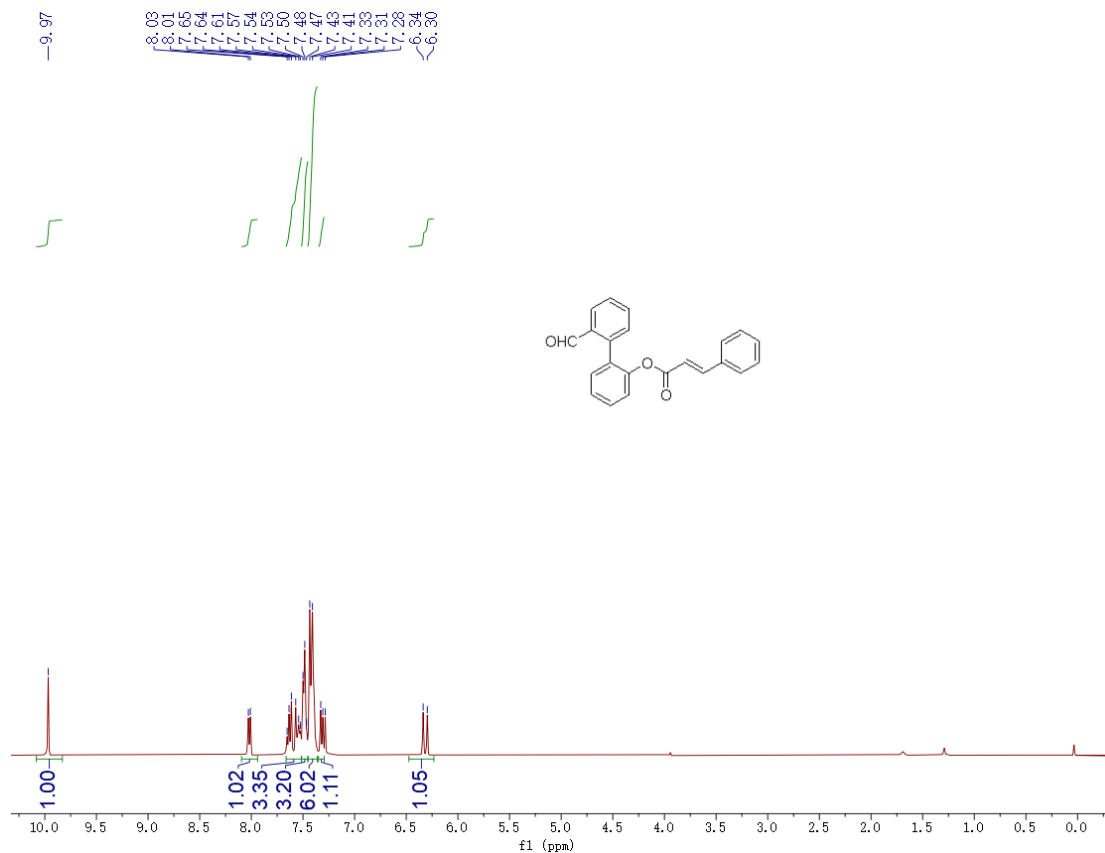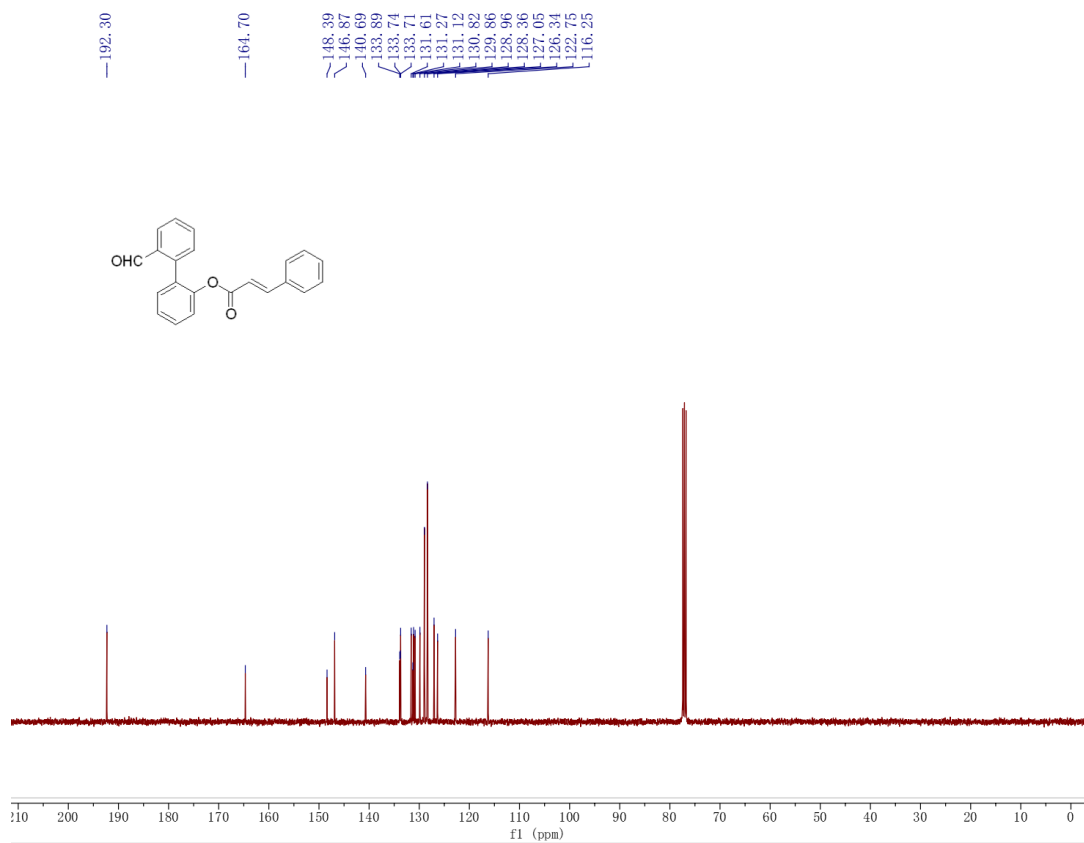

3b

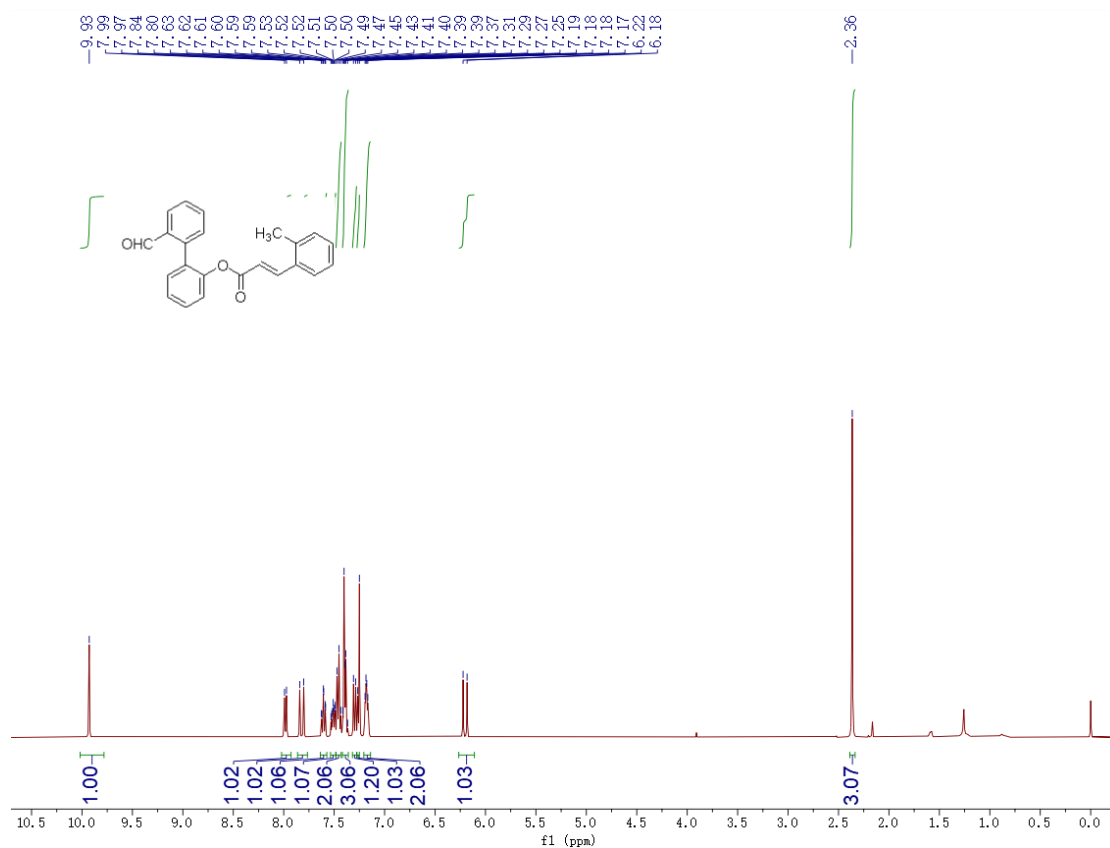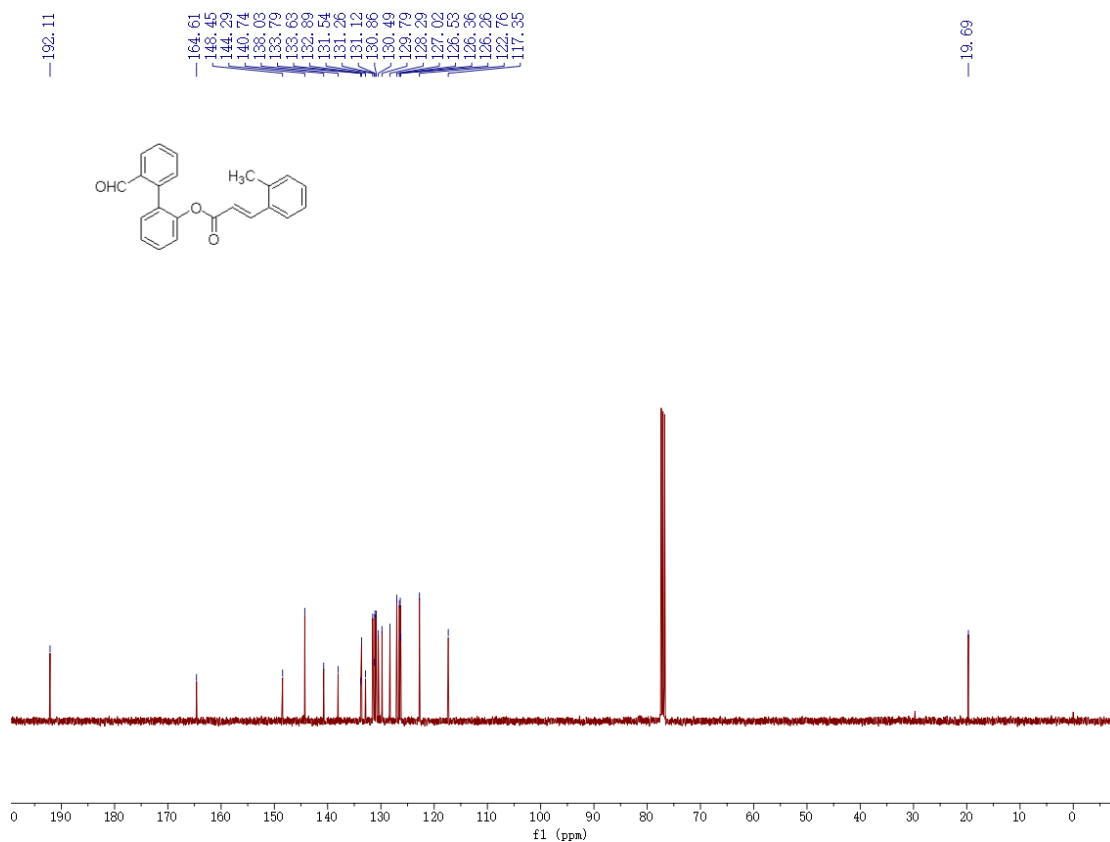

3c

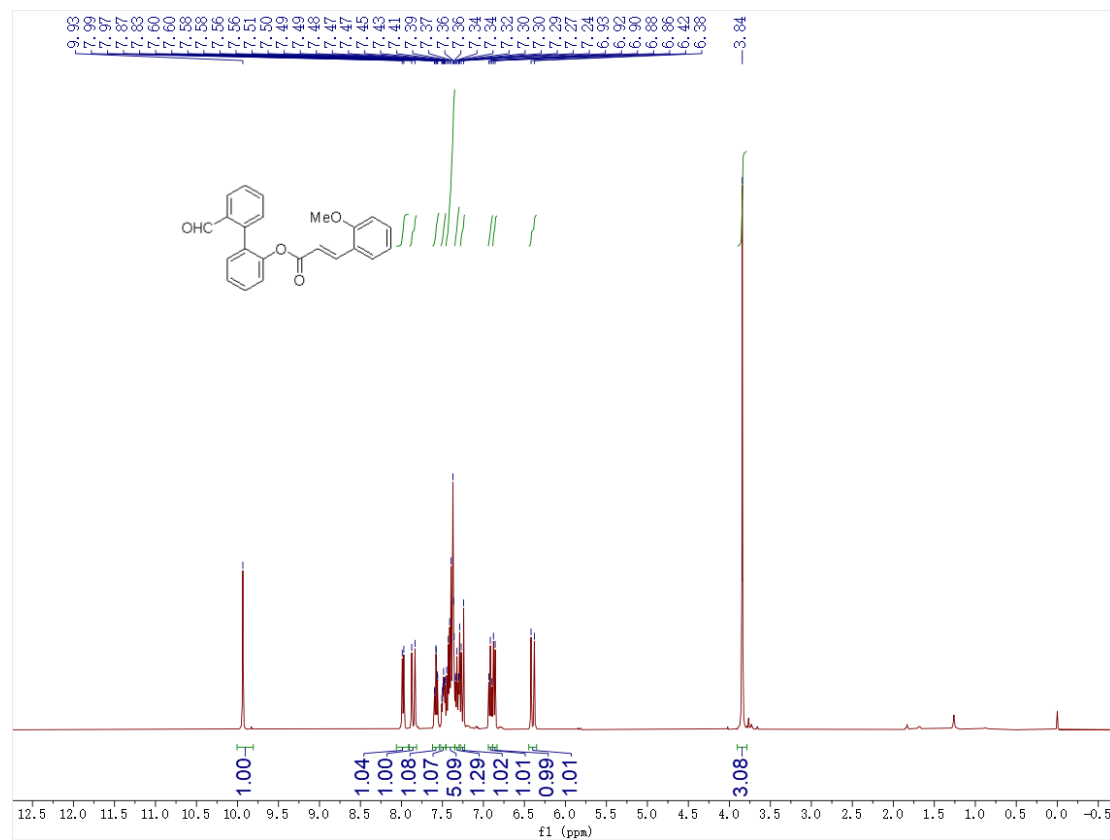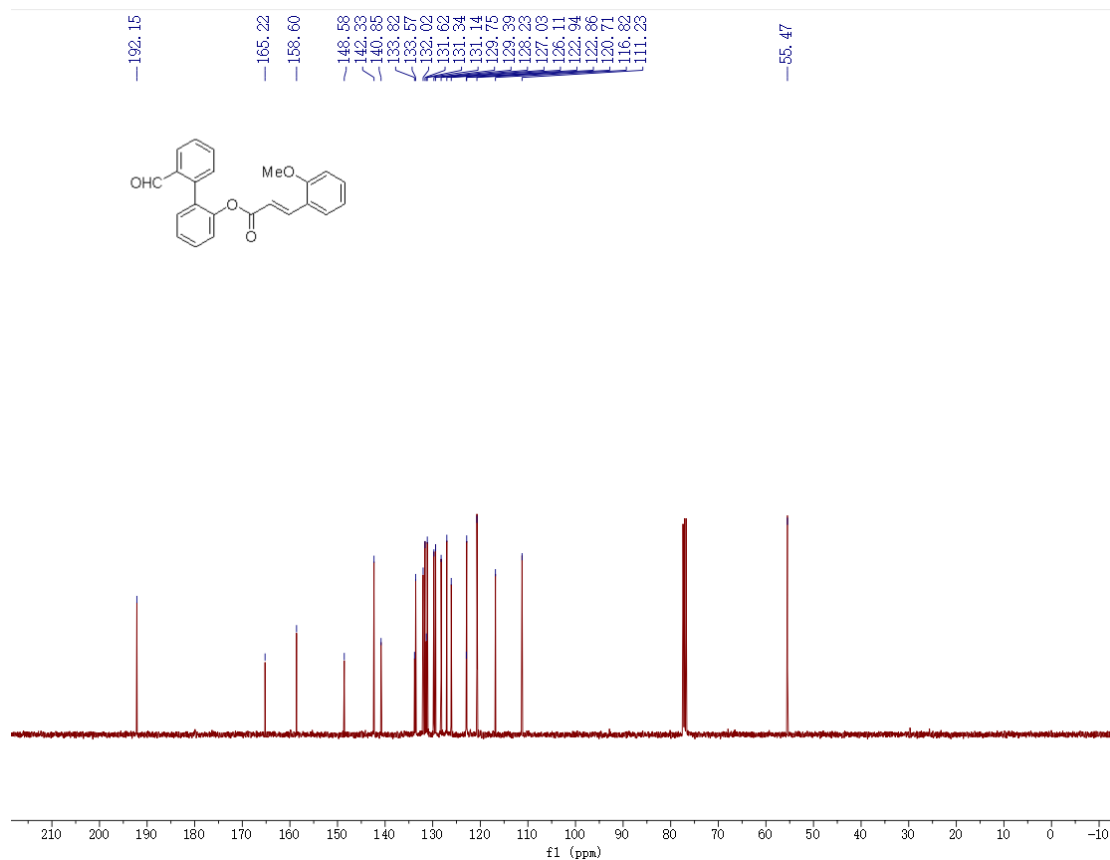

3d

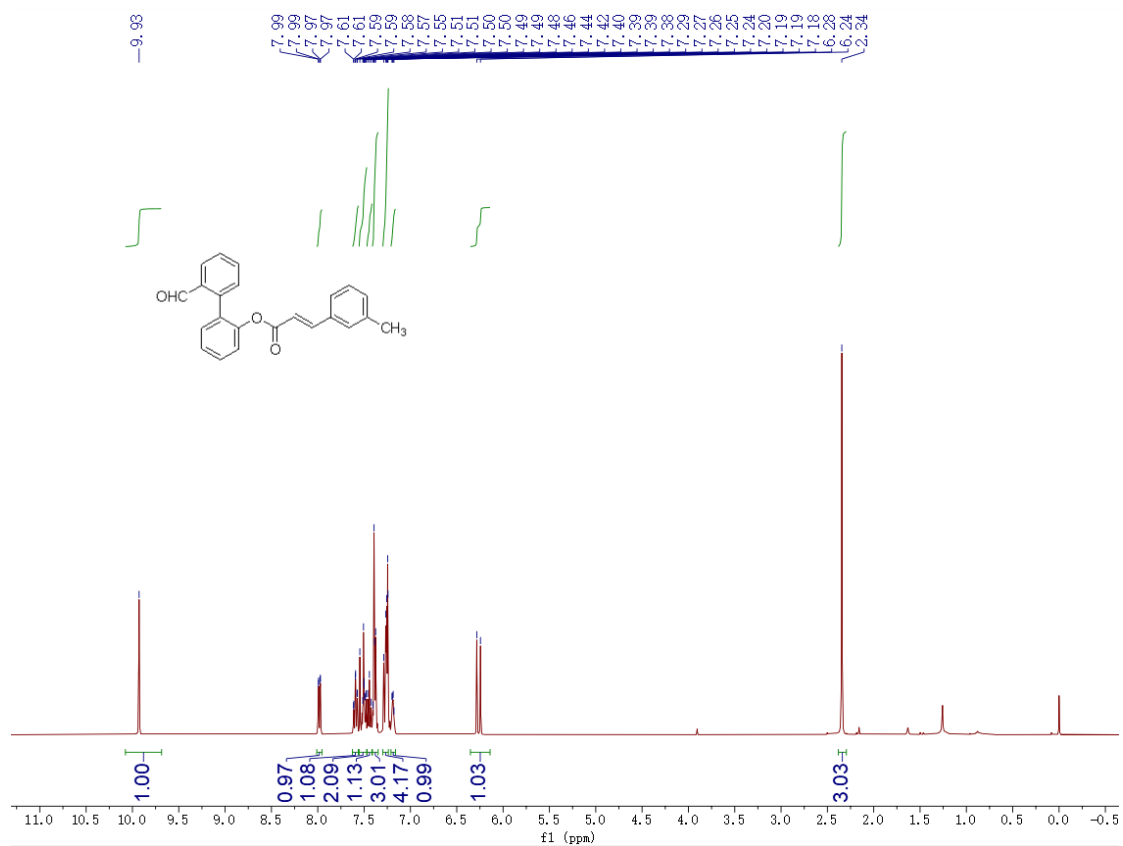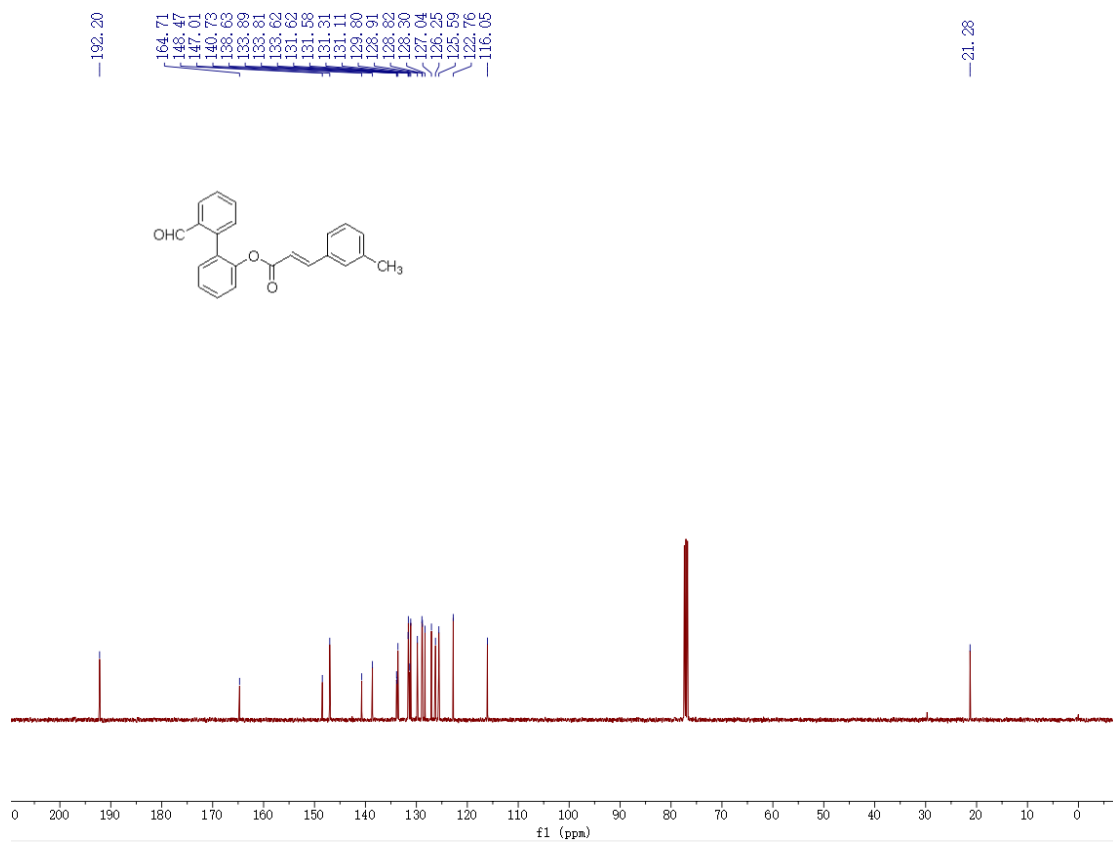

3e

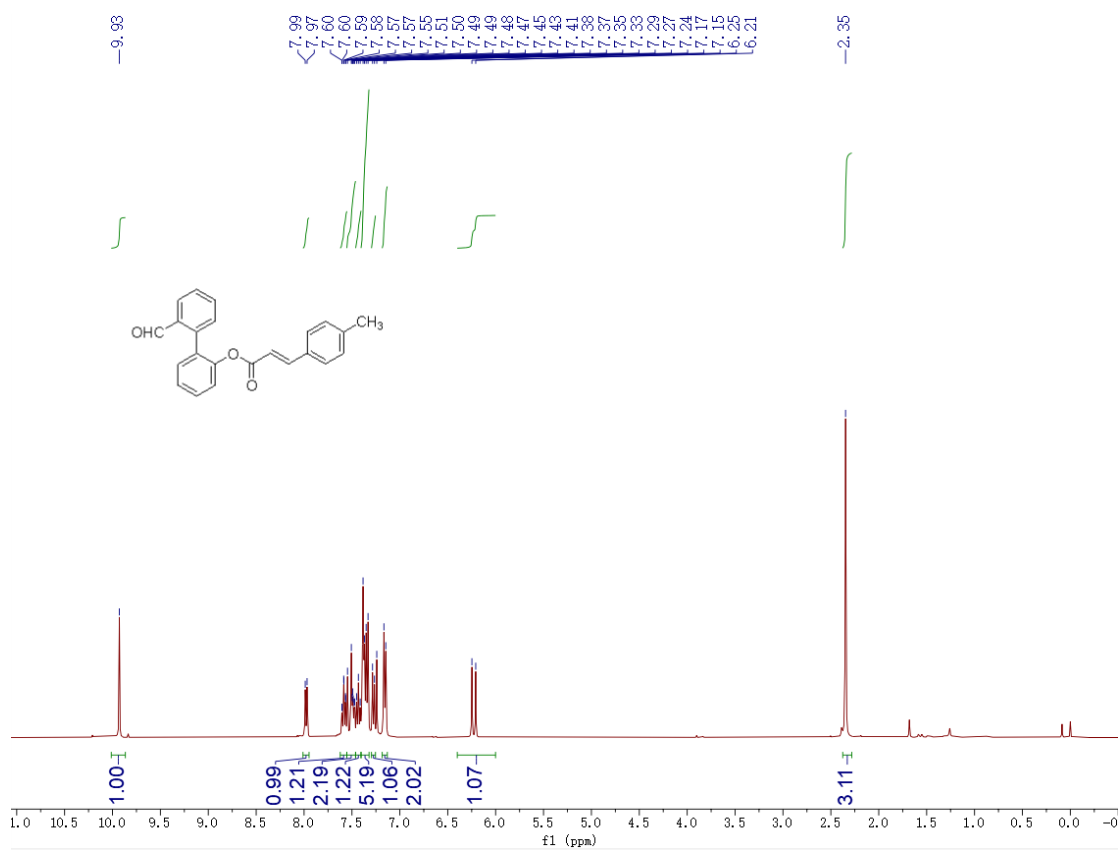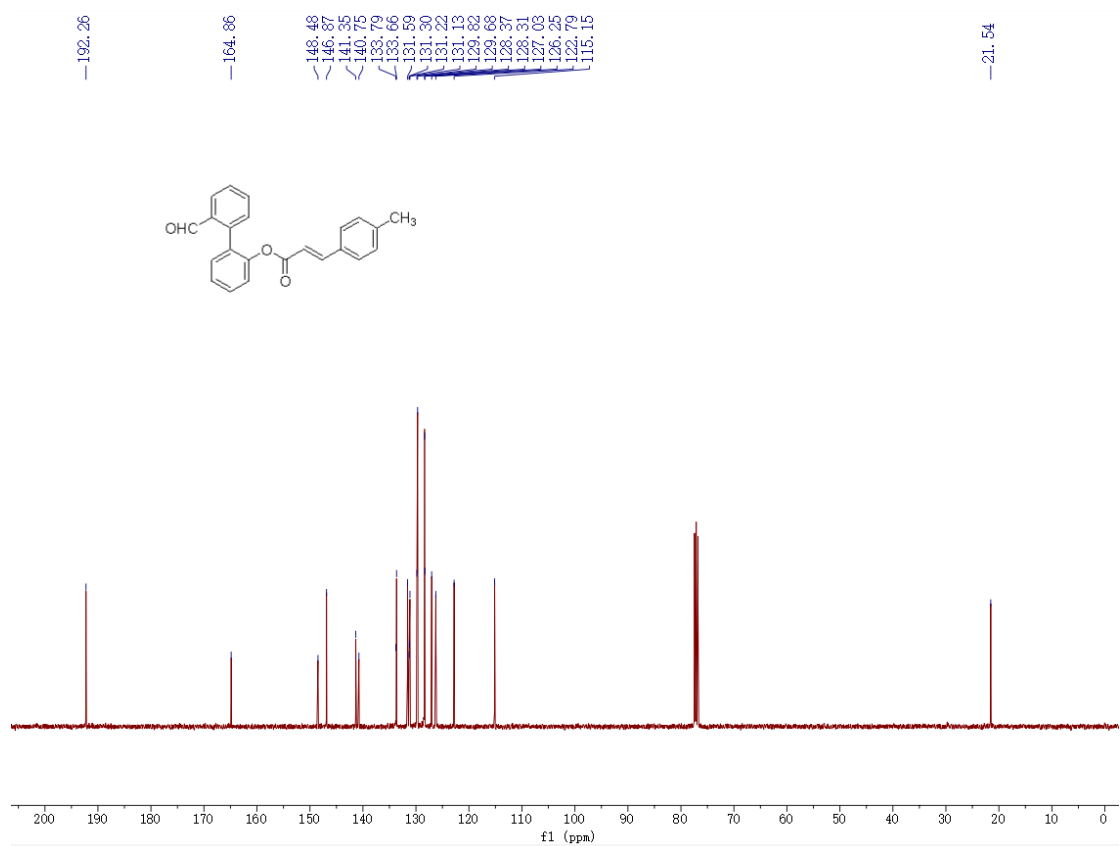

3f

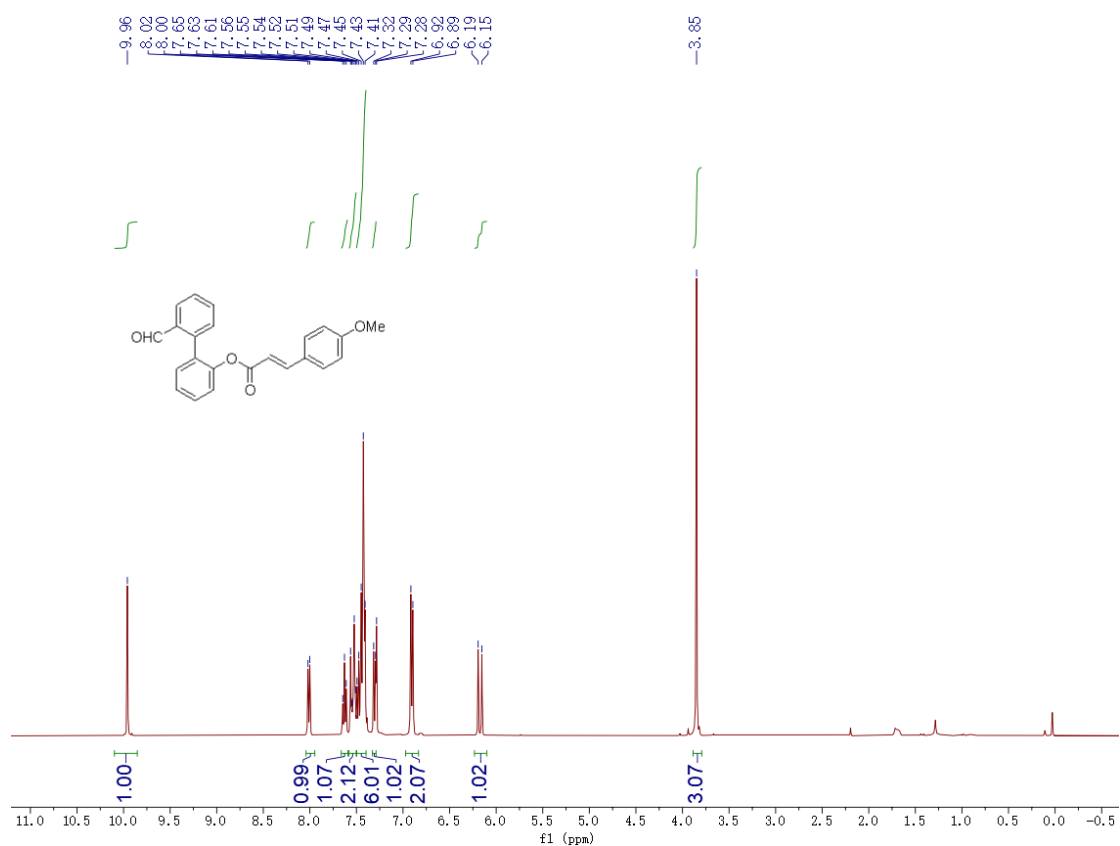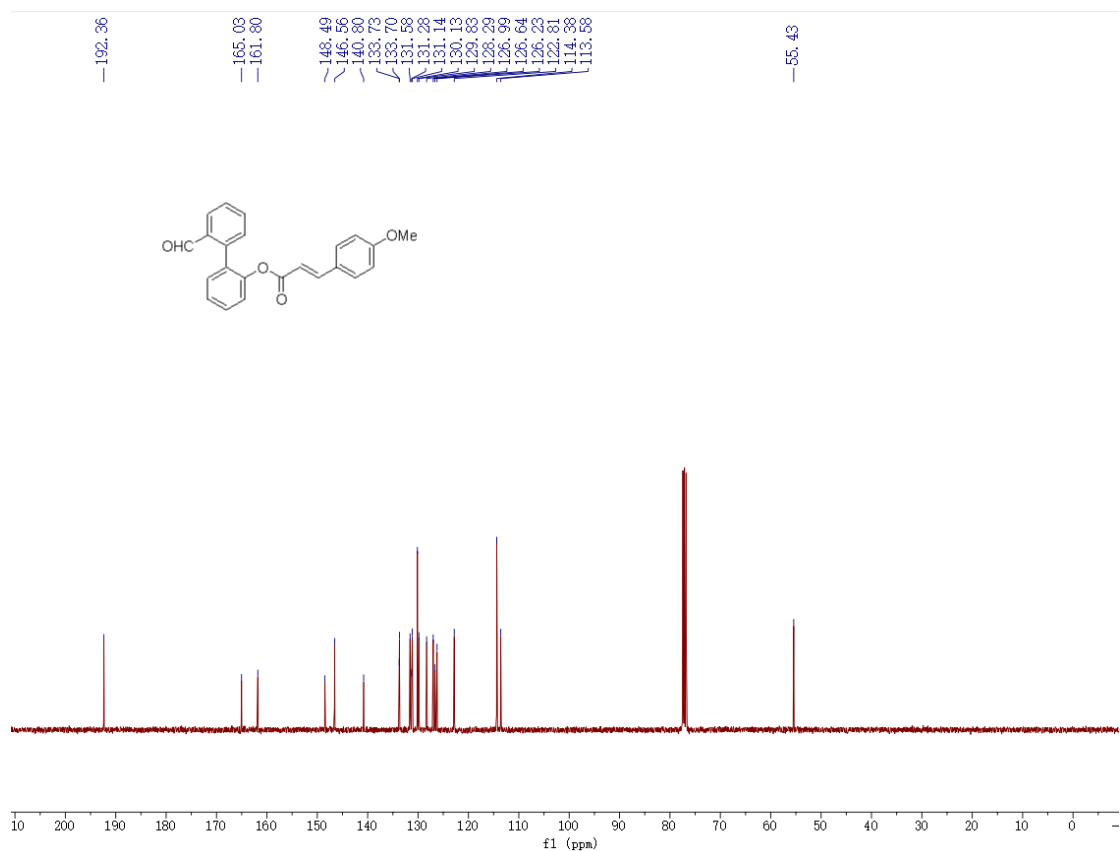



3g

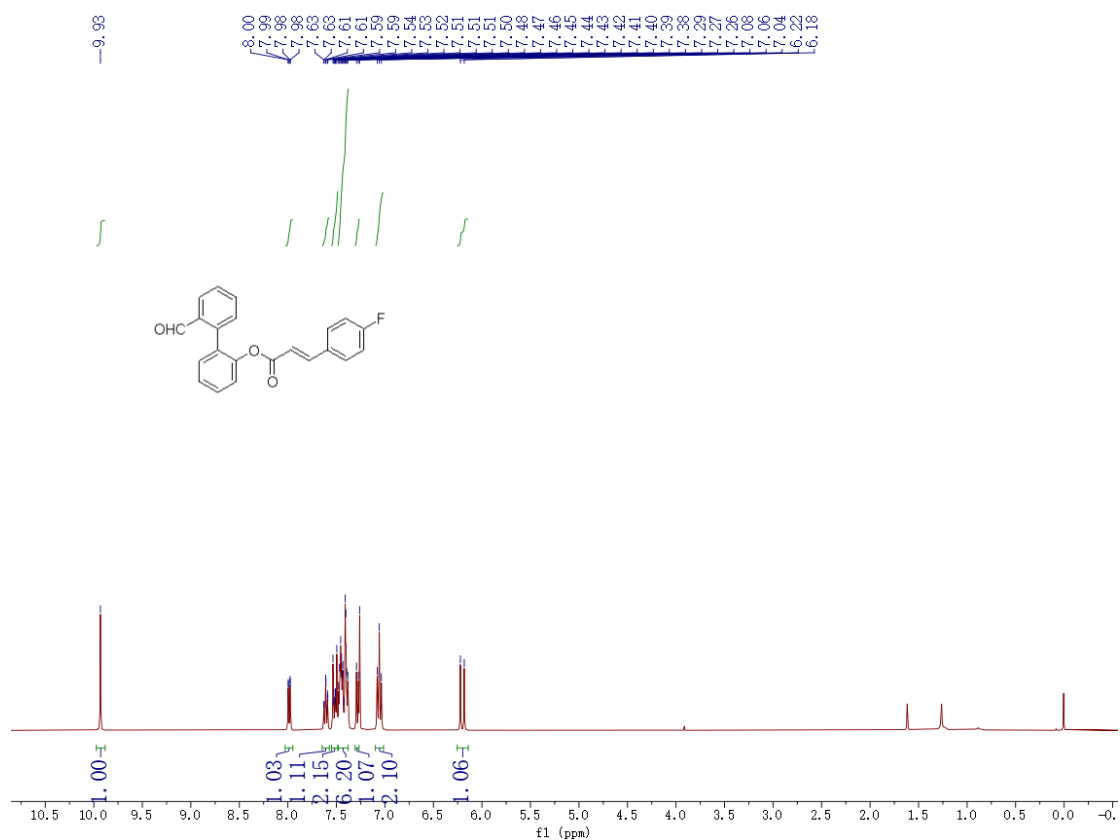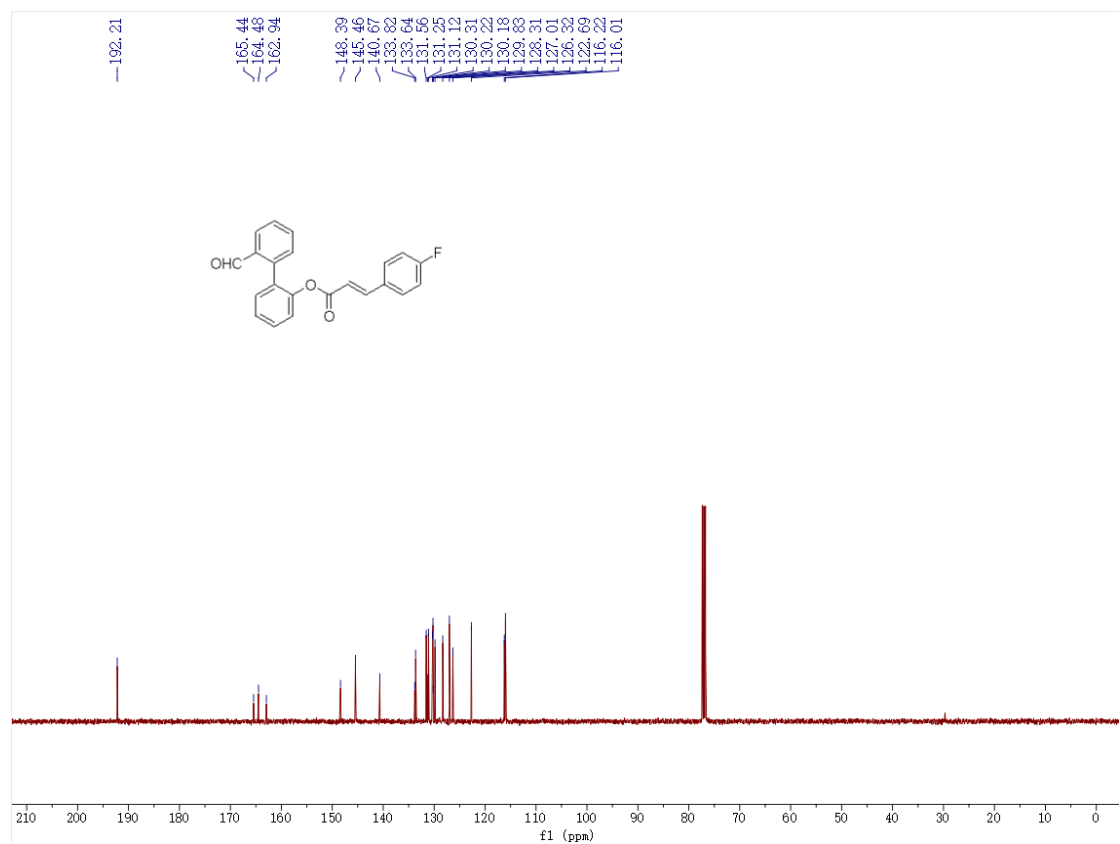

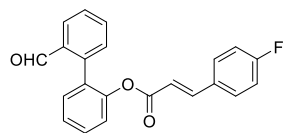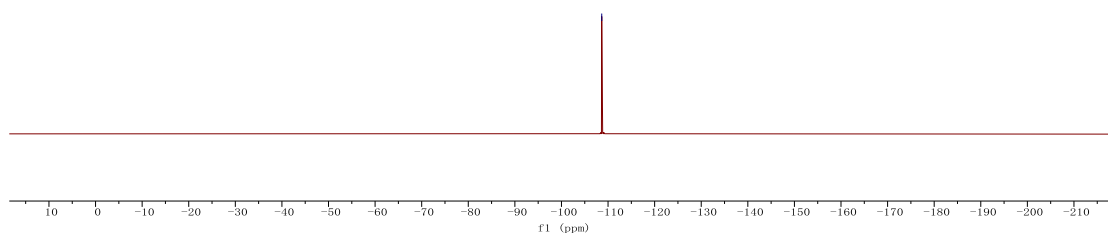

-108.64

3h

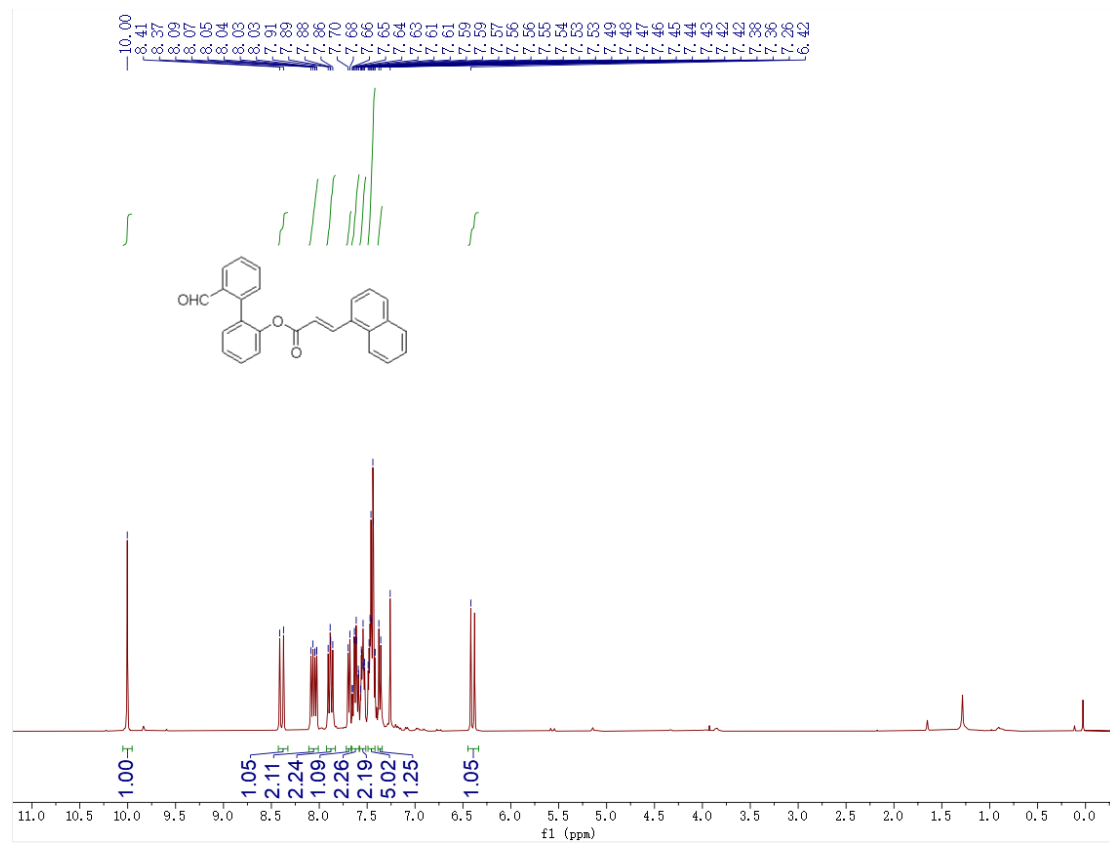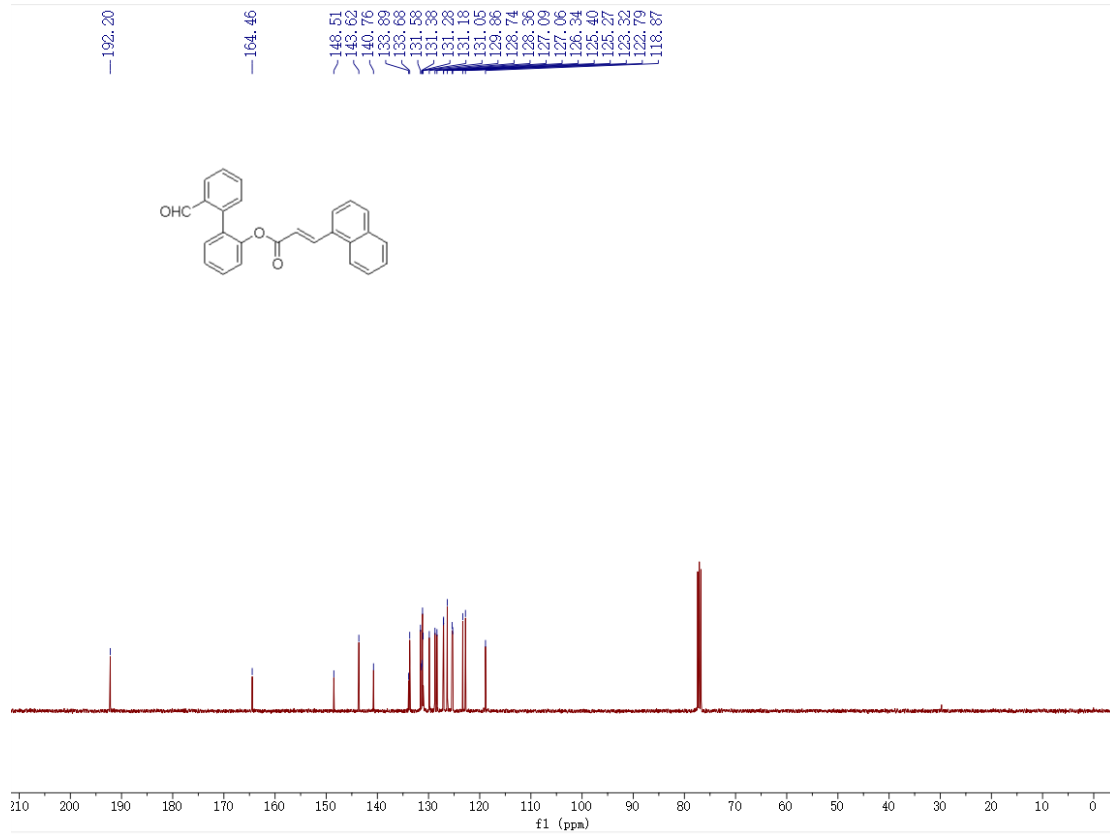

3i

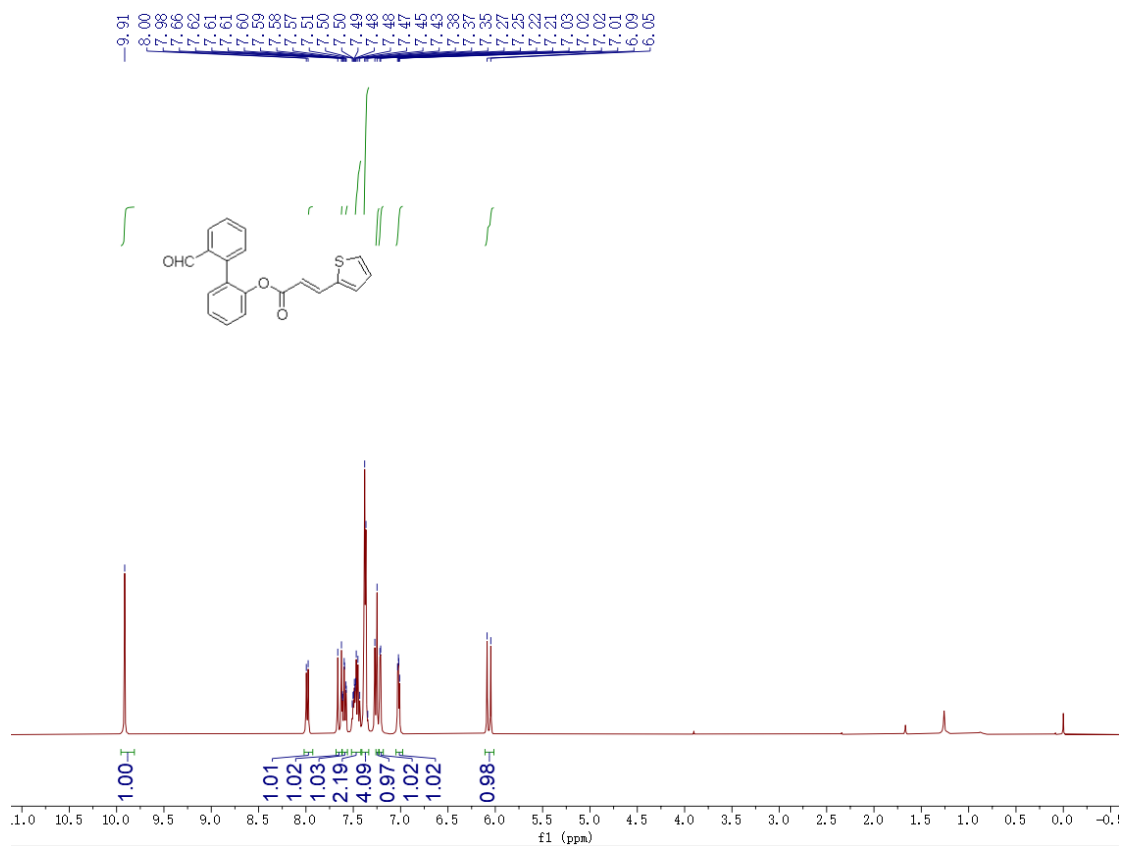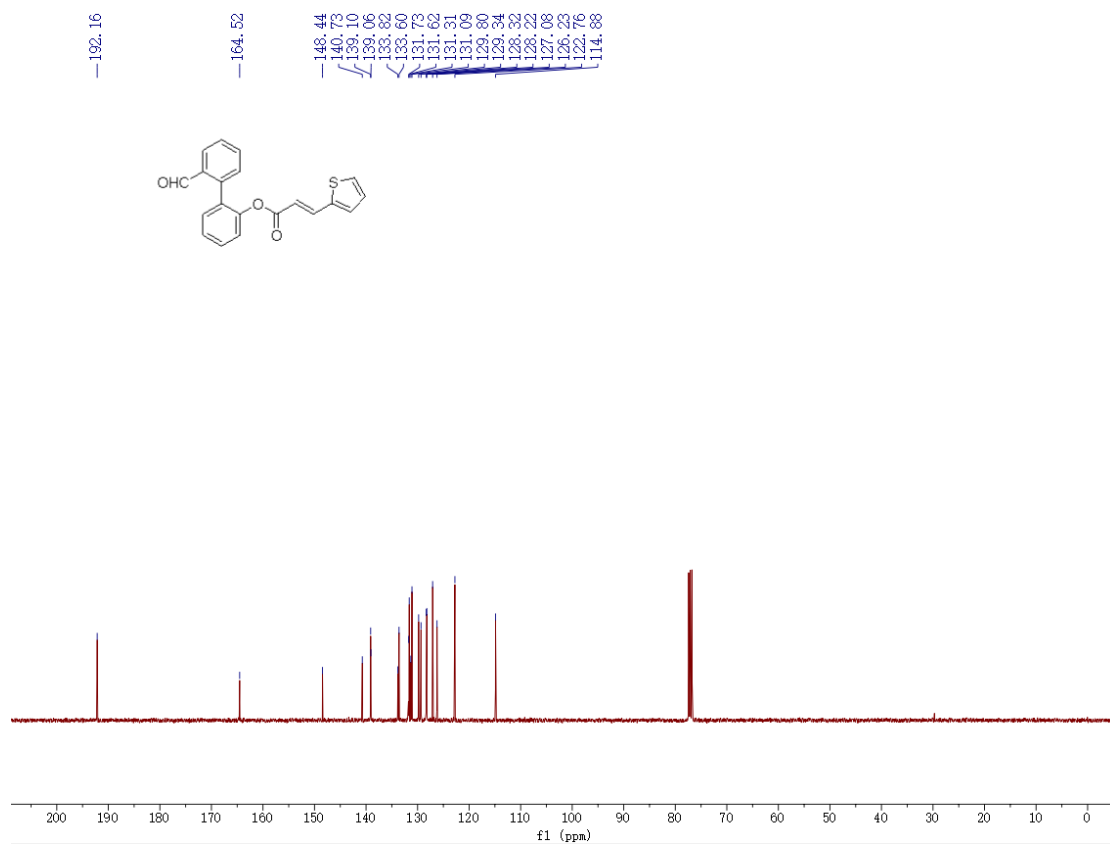

3j

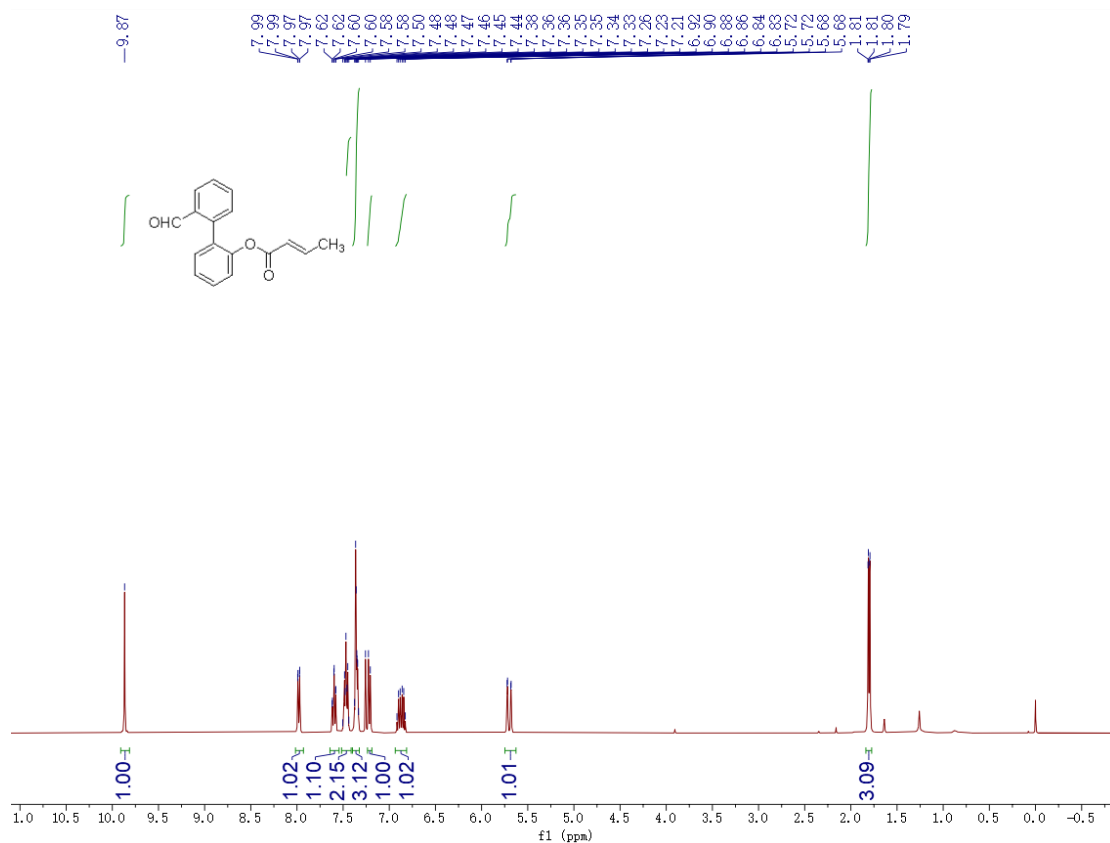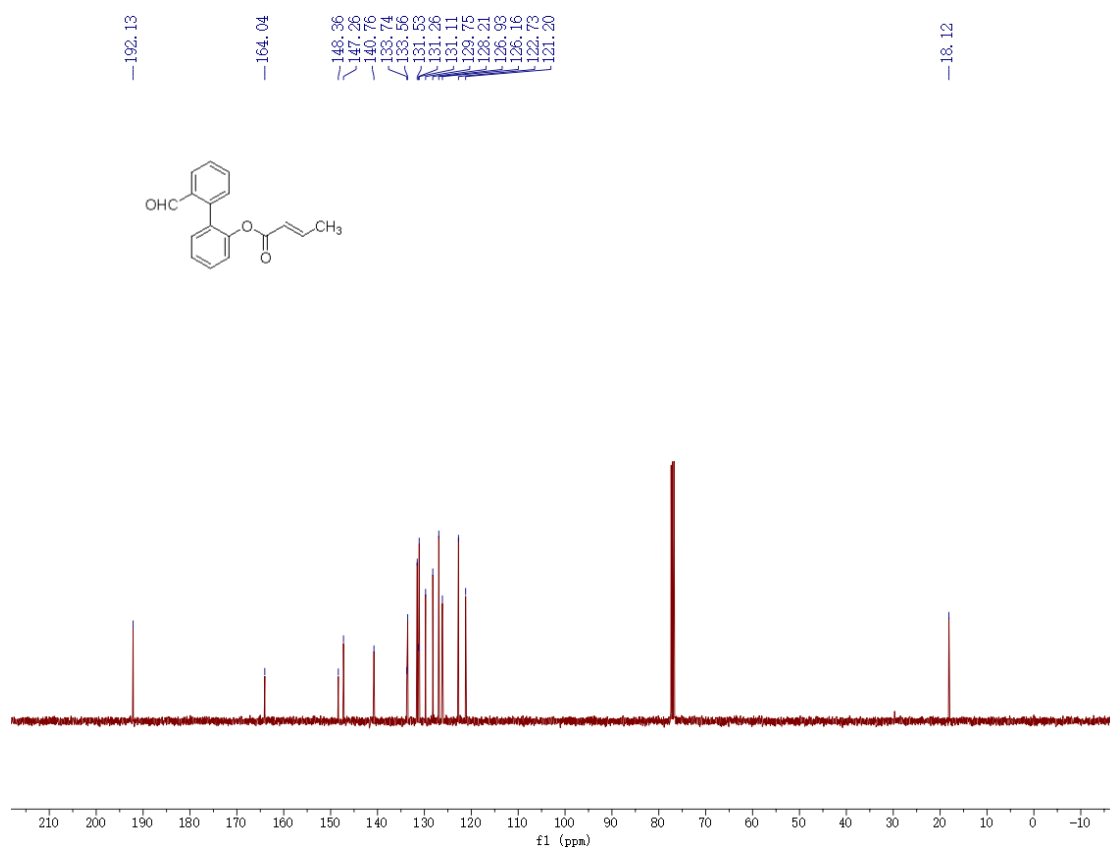

3k

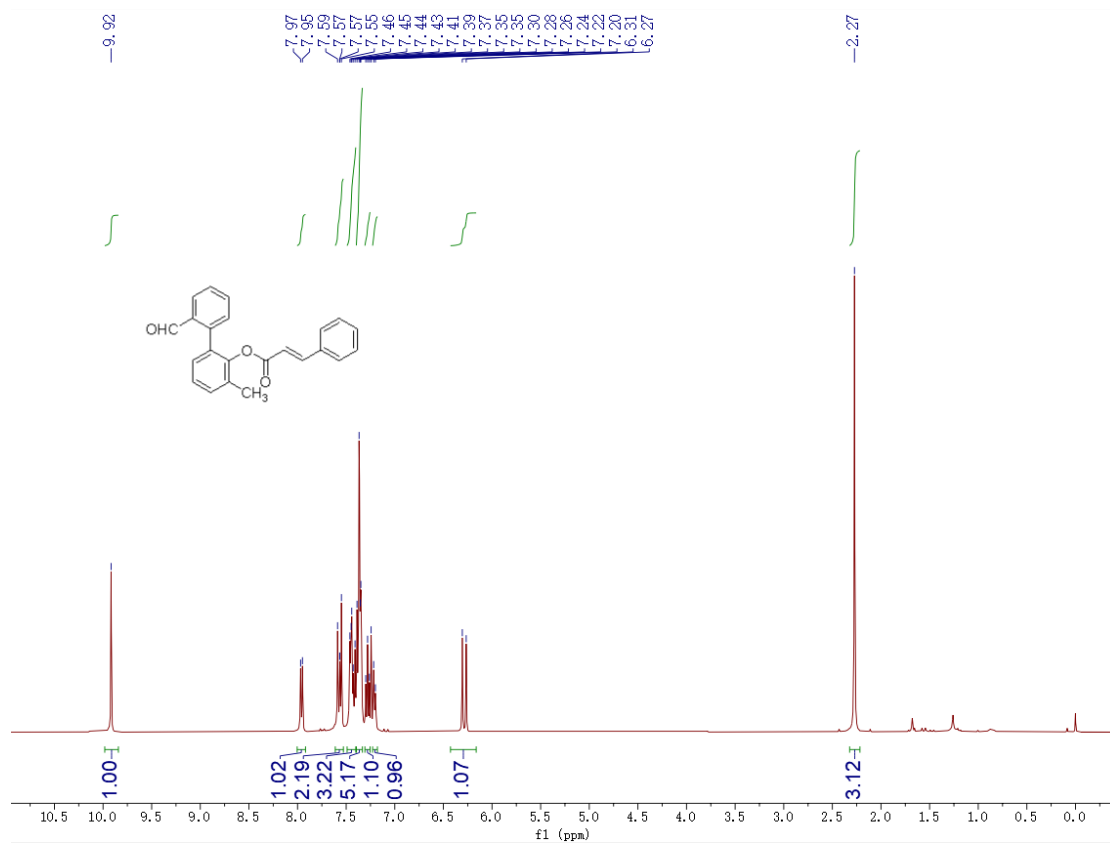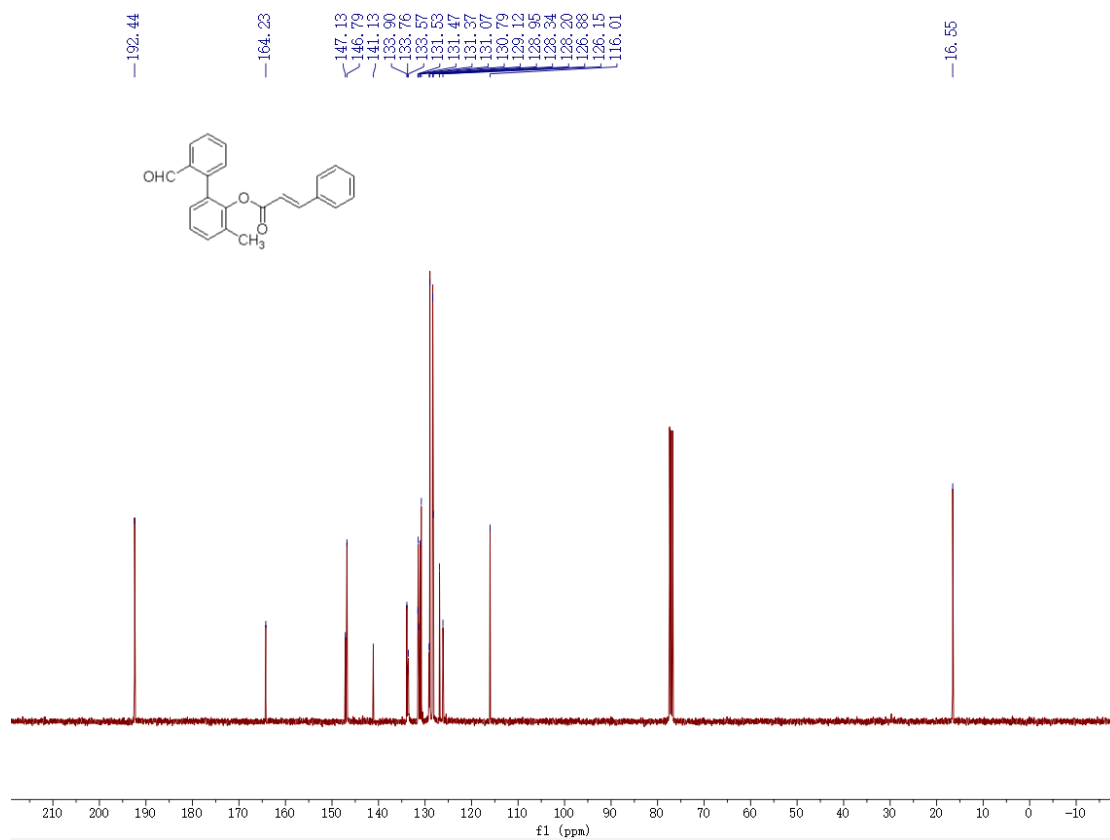

31

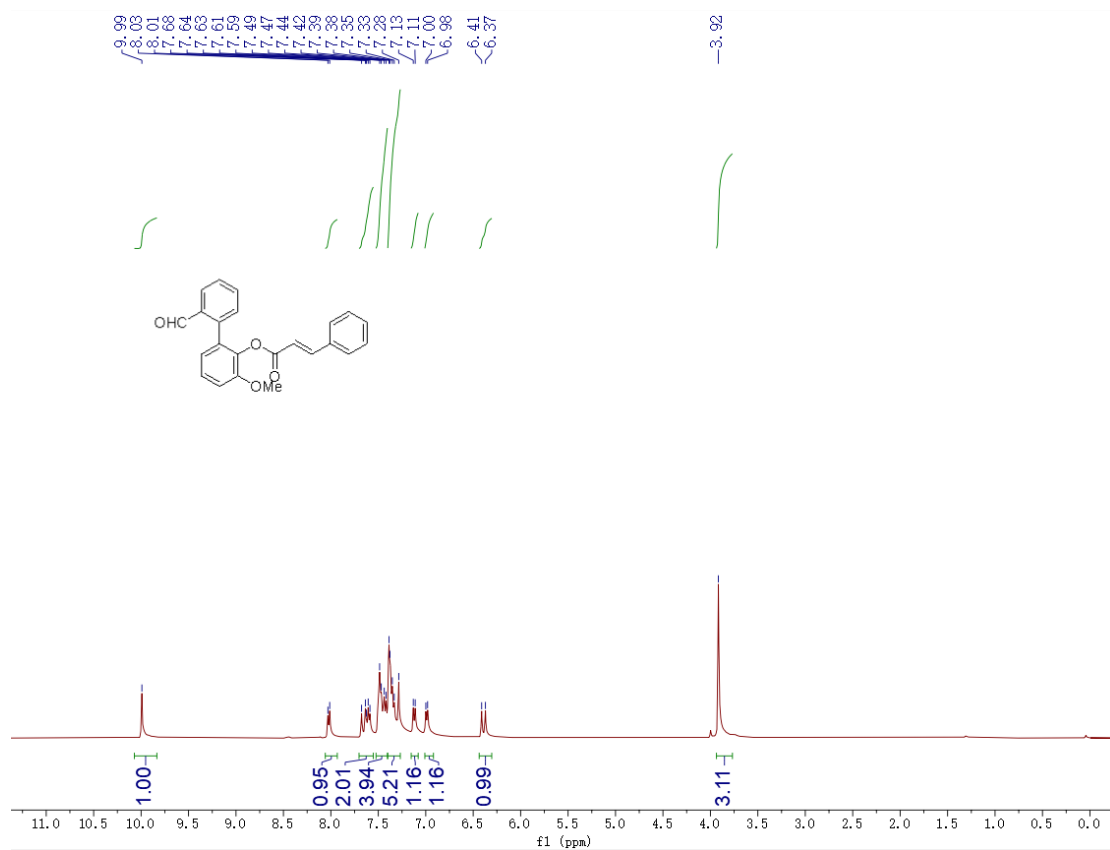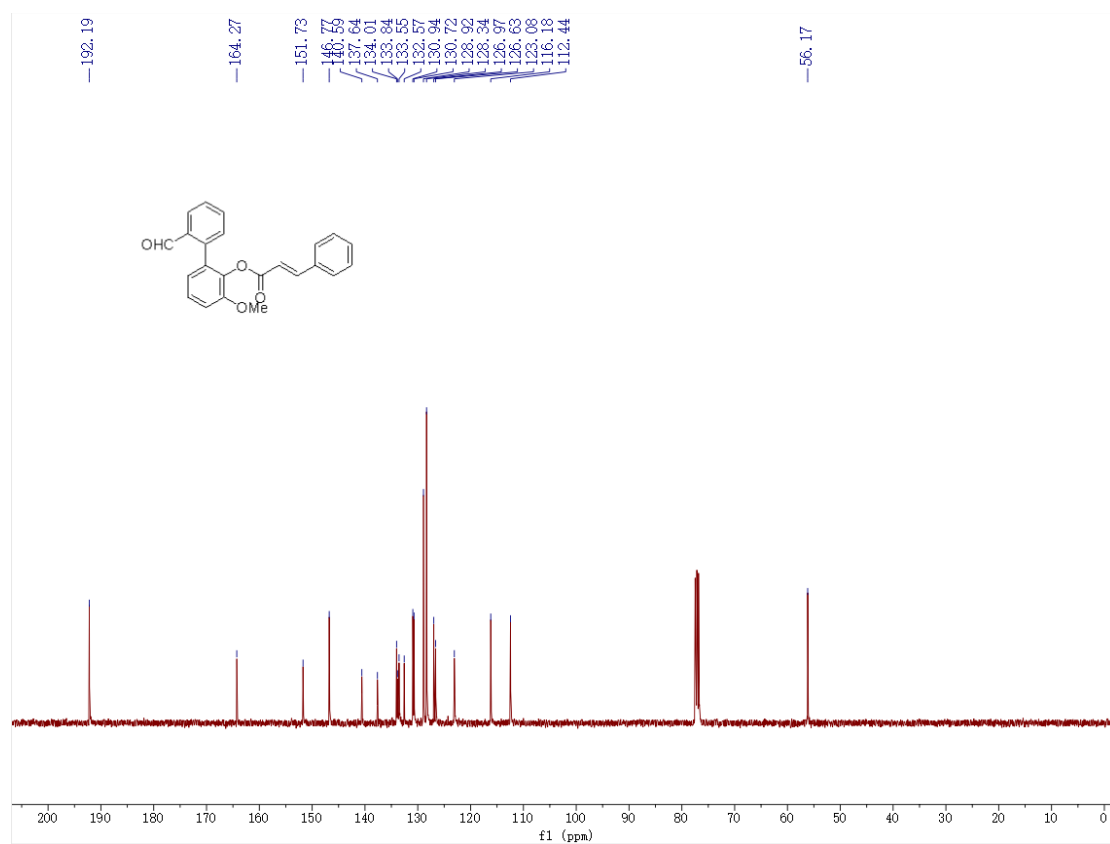

### 3m

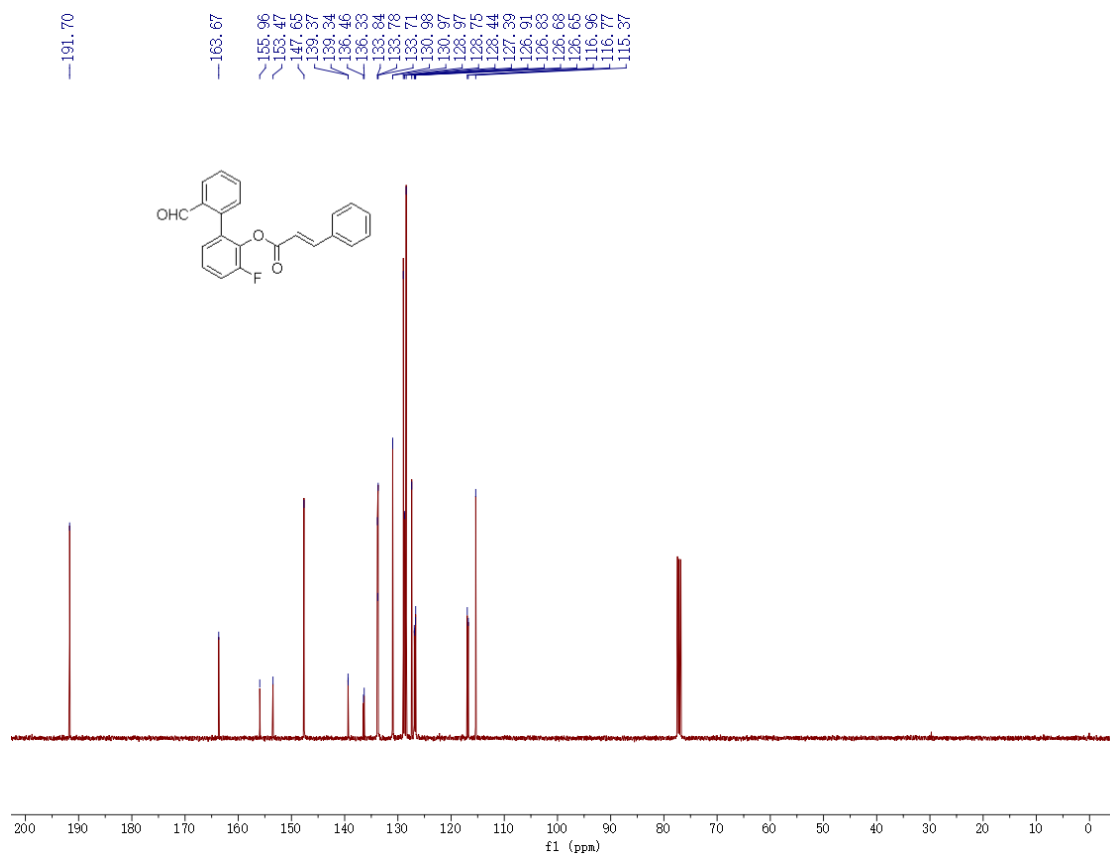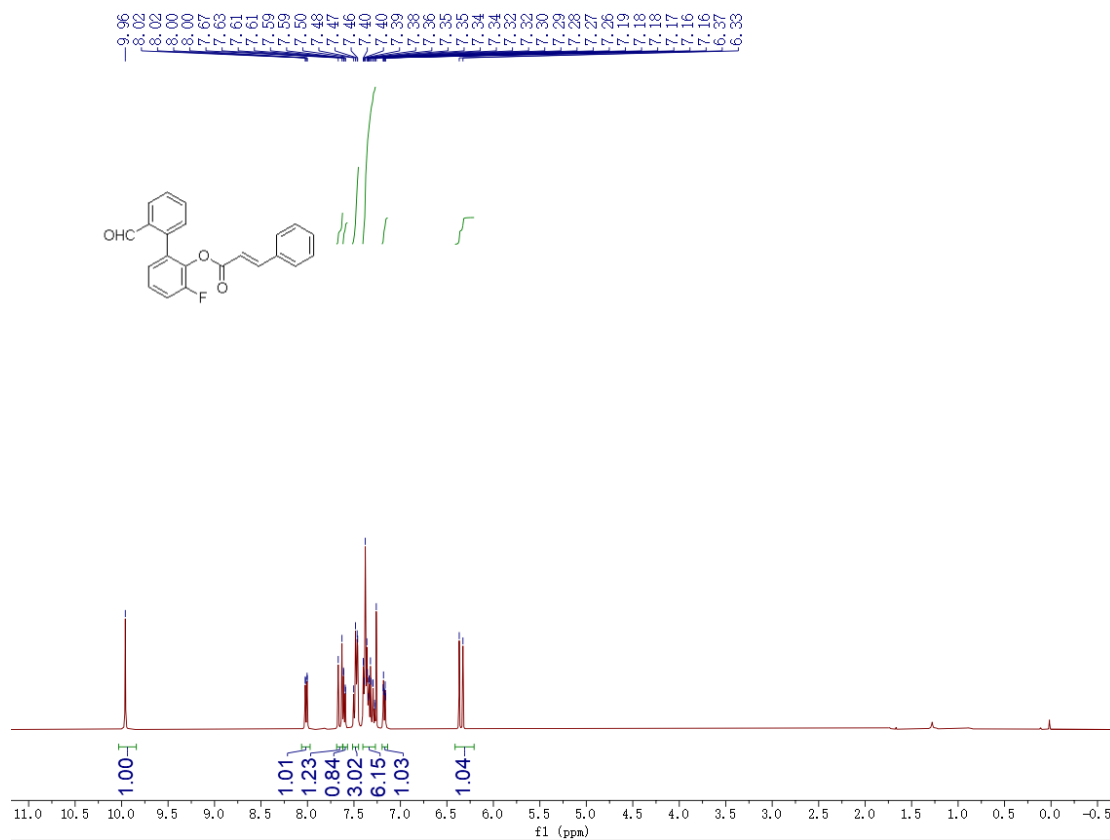



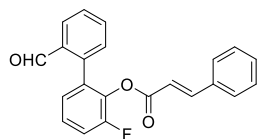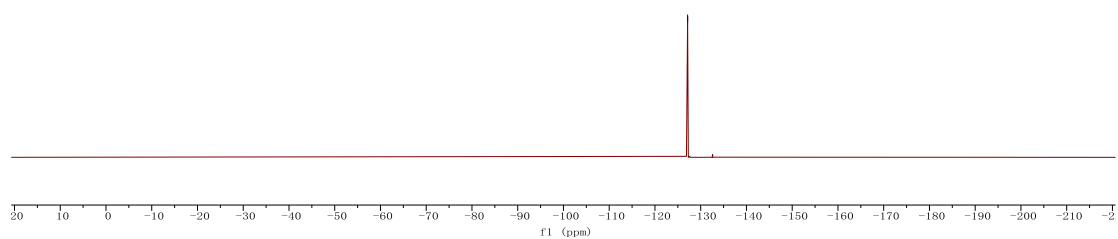

3n

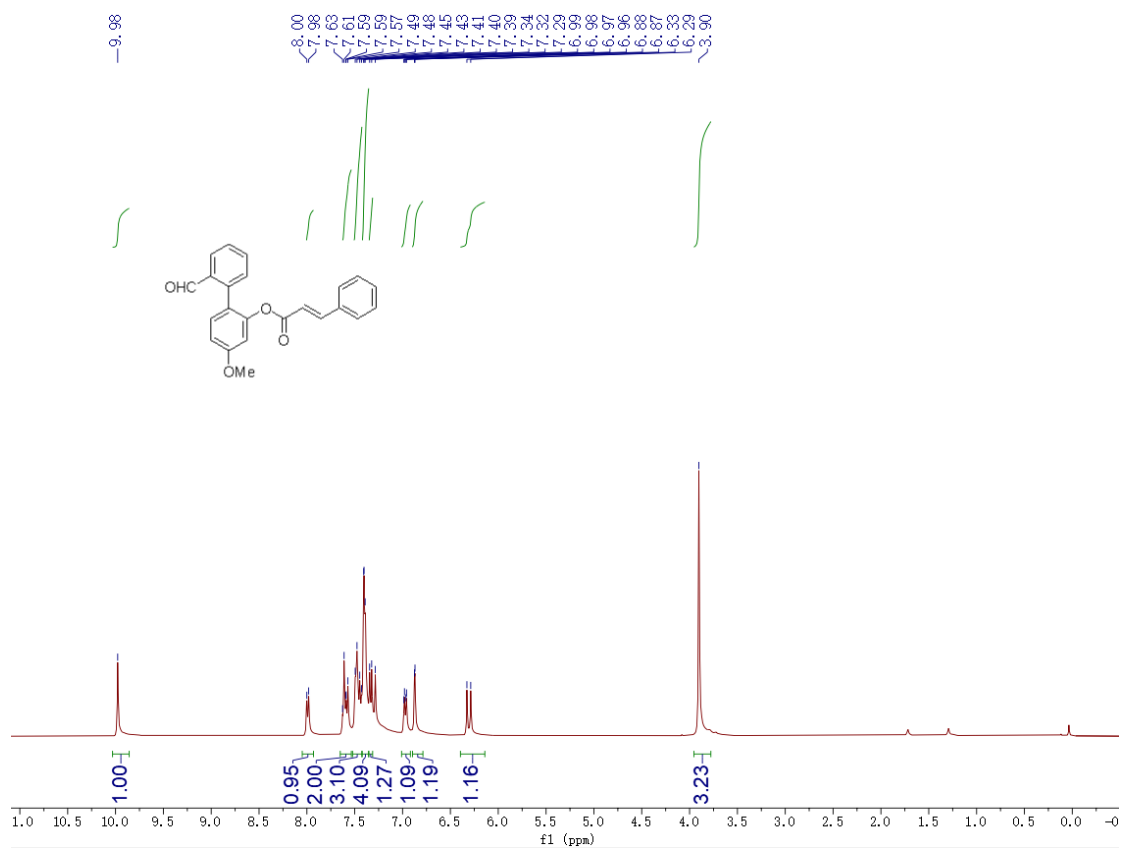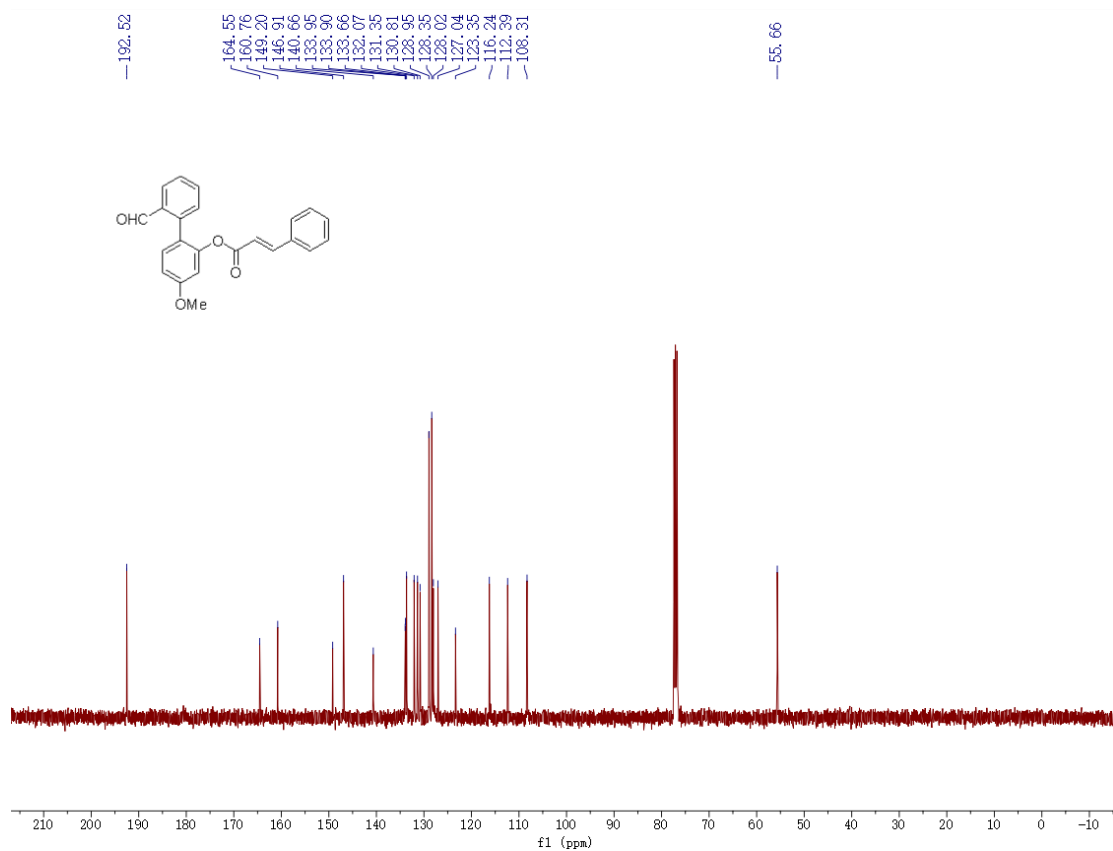

30

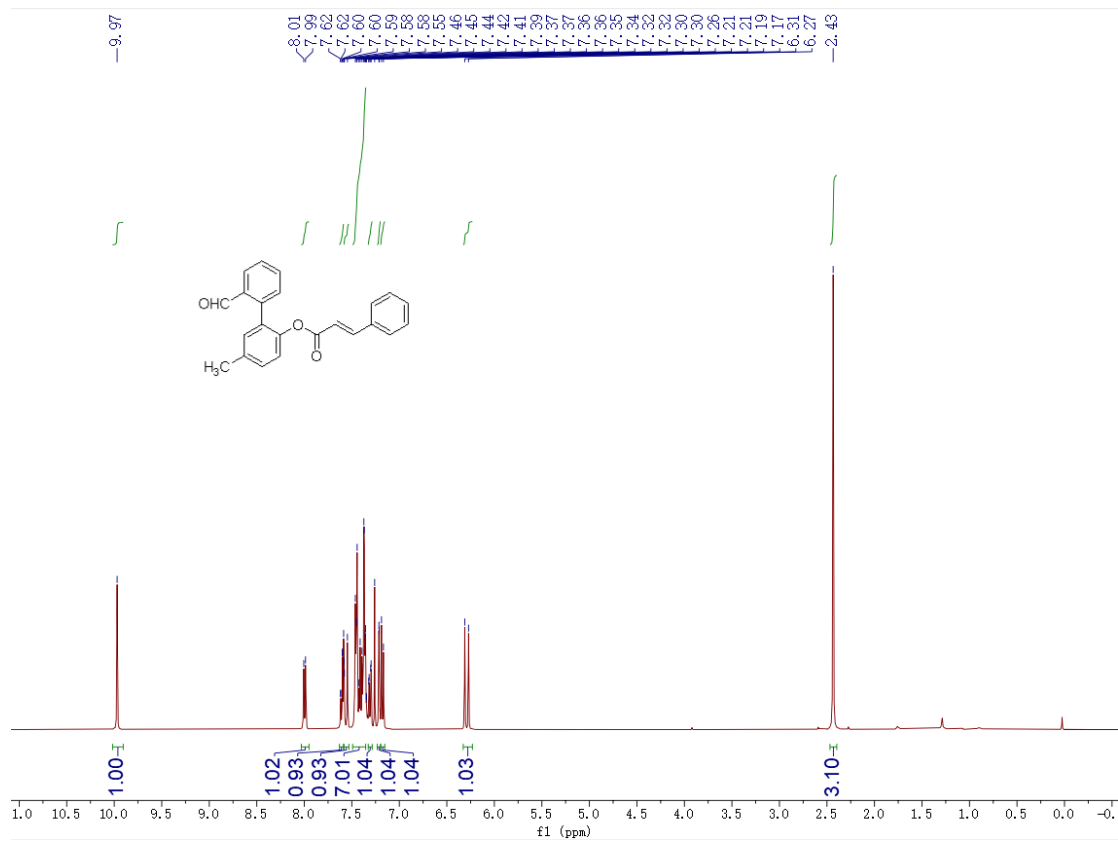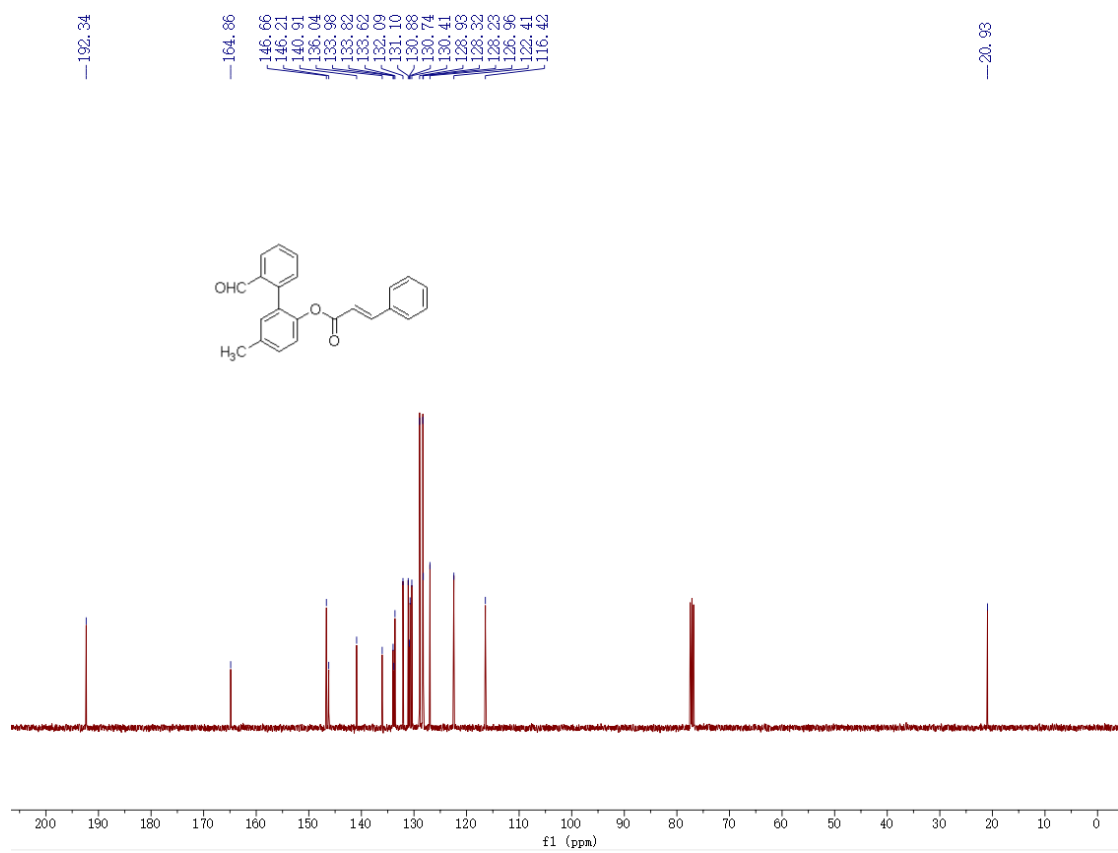

3p

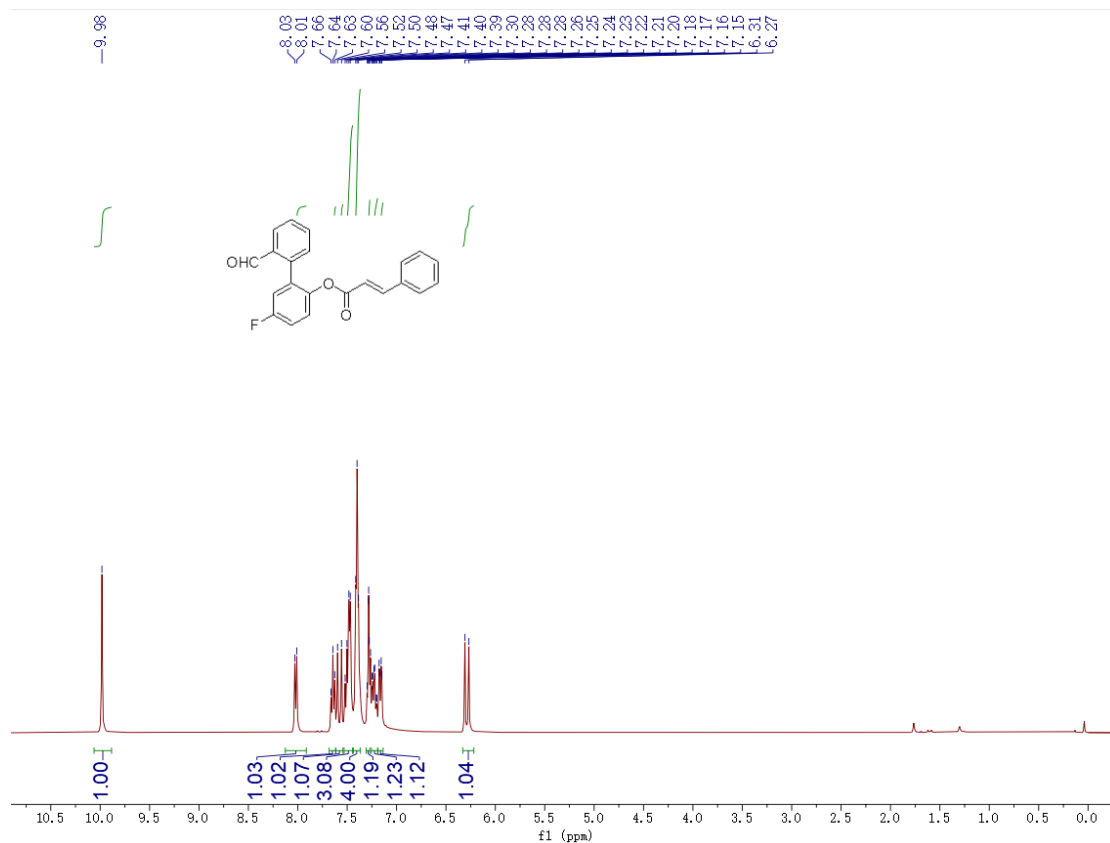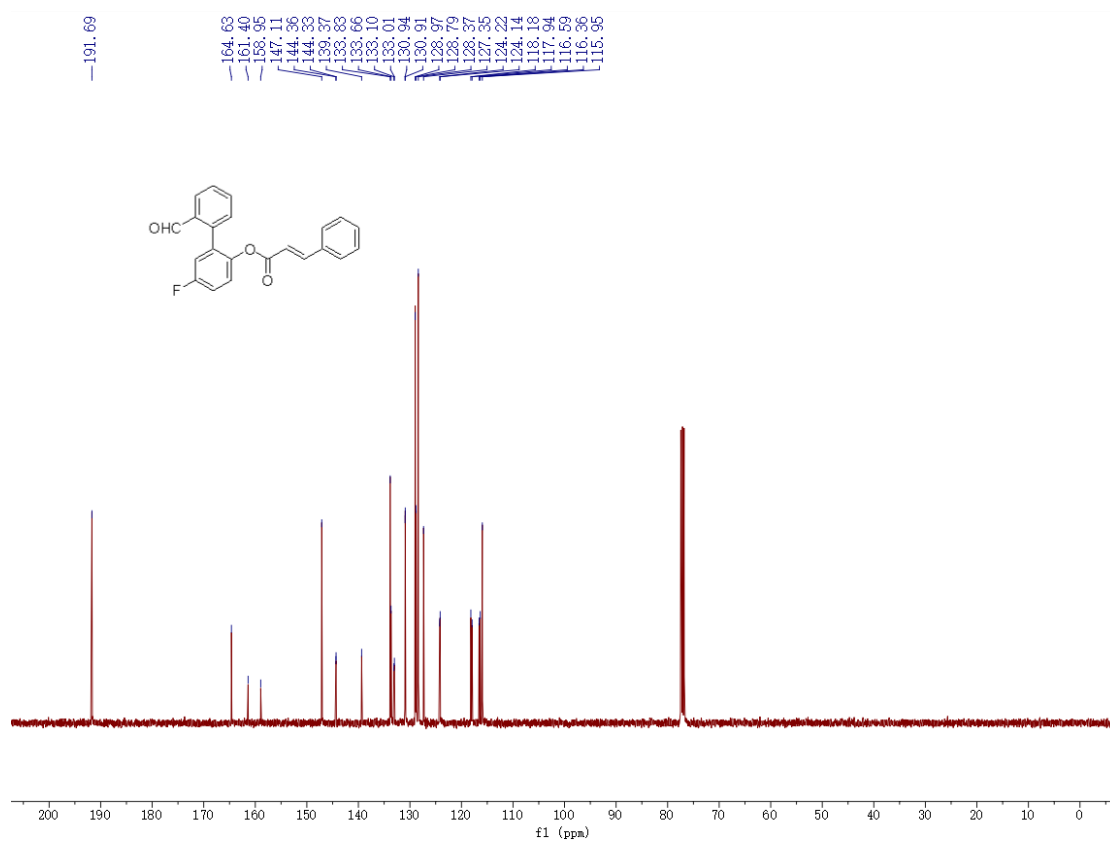

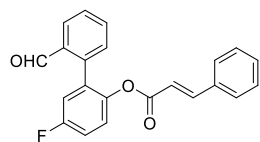

-115.85

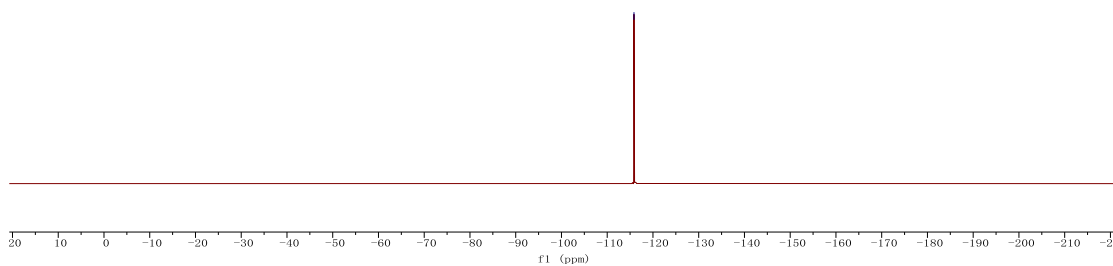

3q

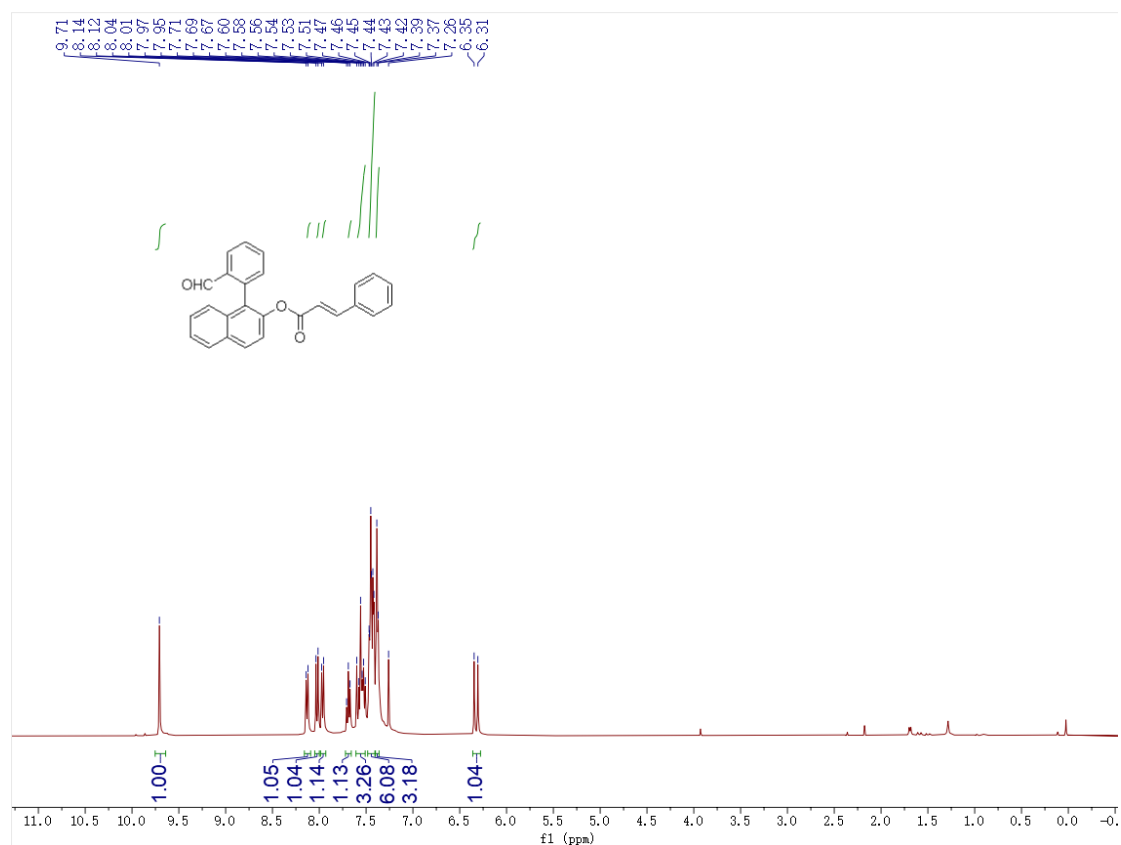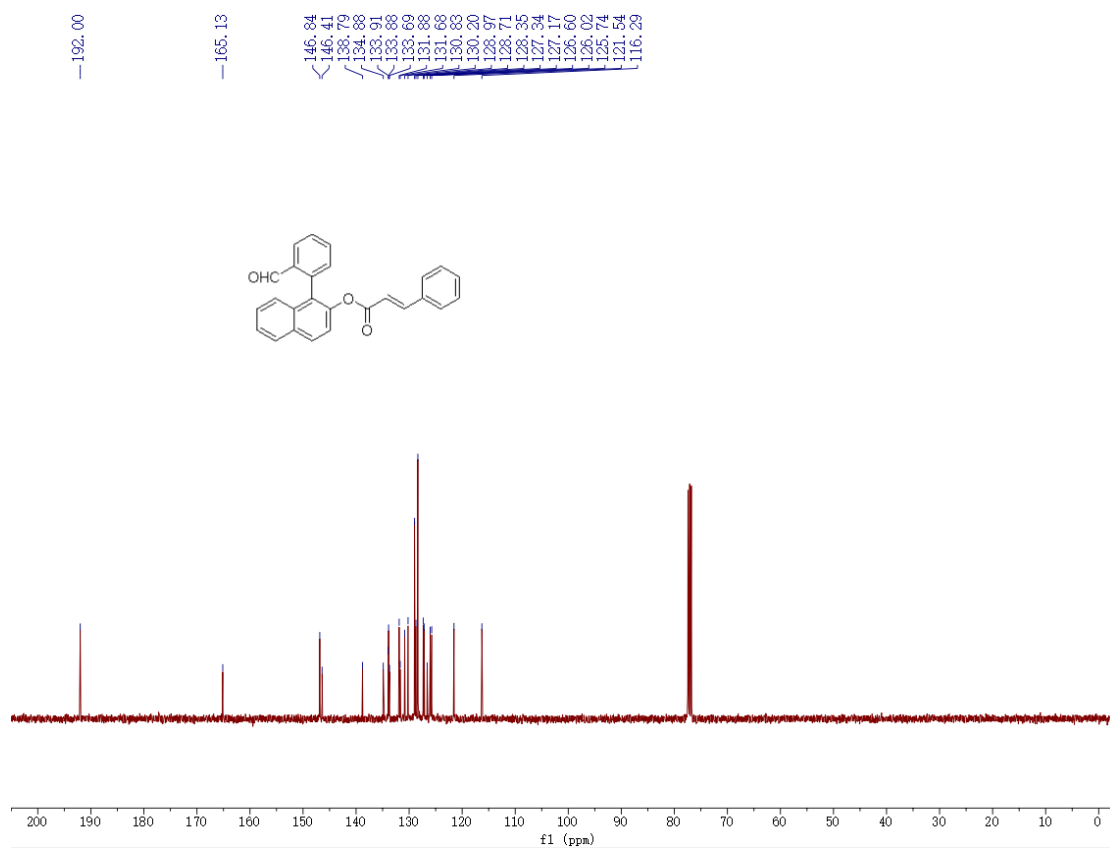

3r

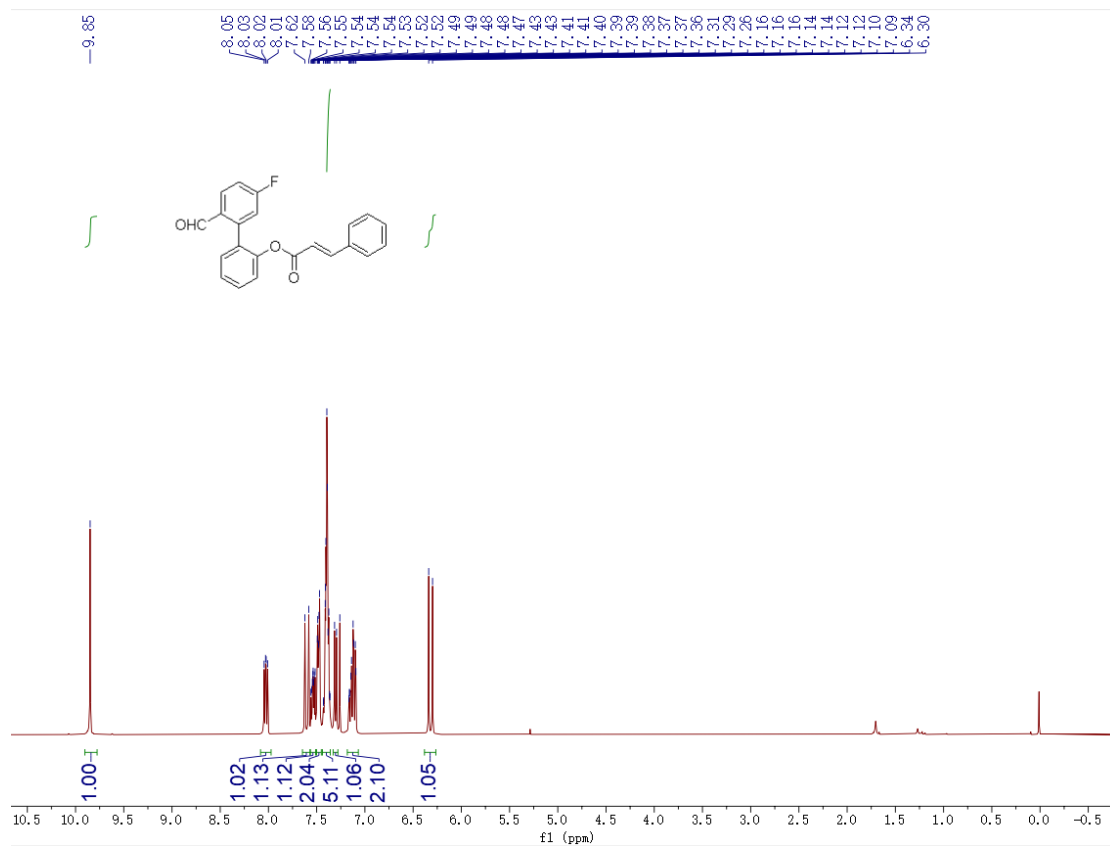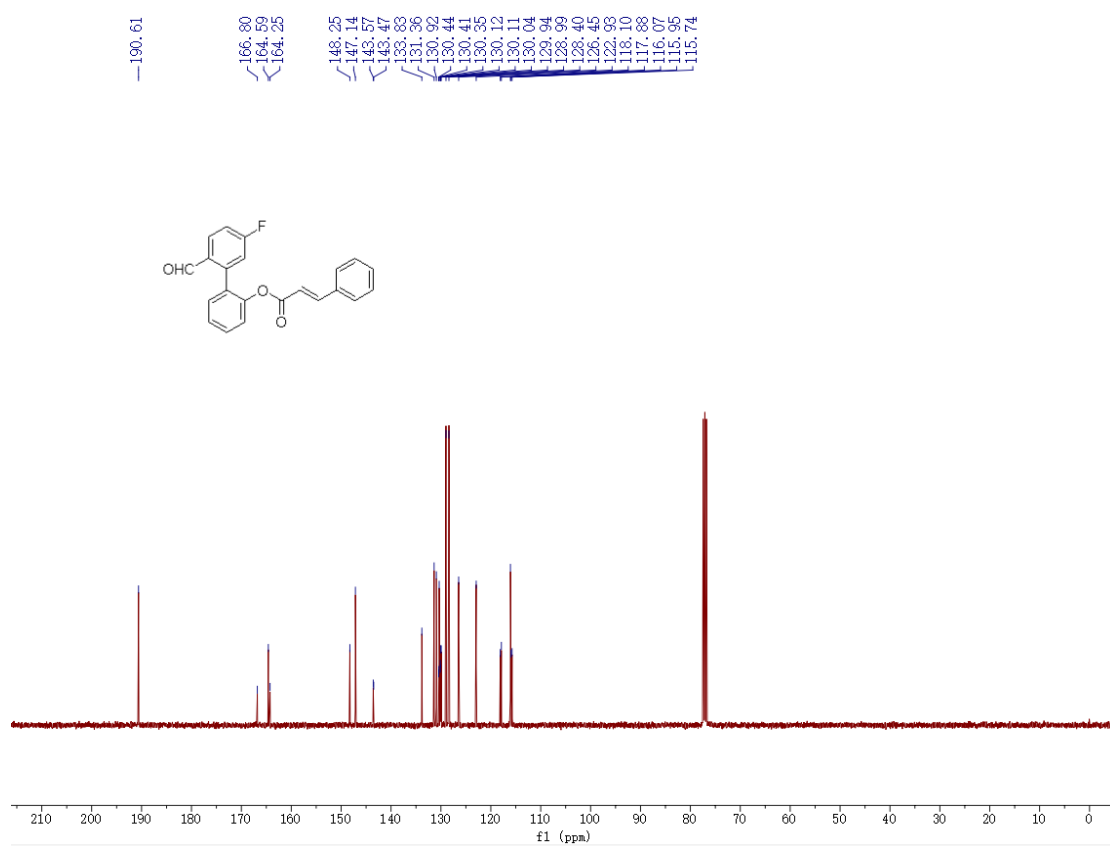

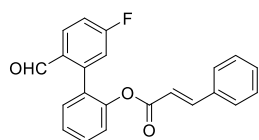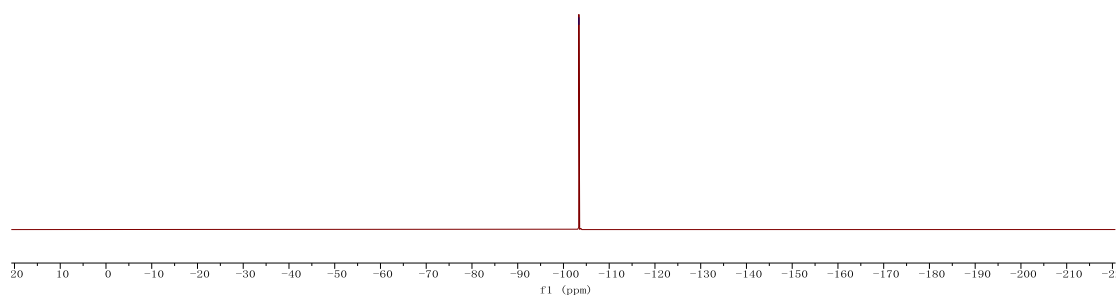



3s

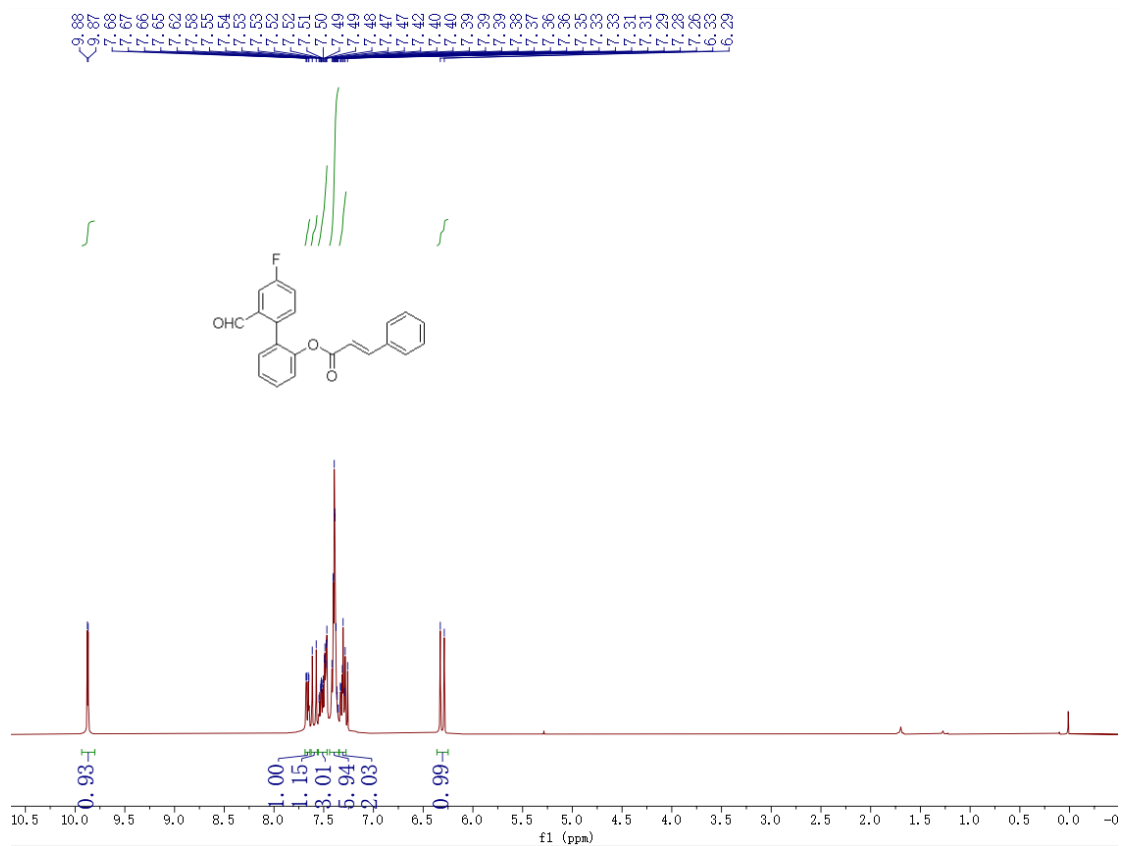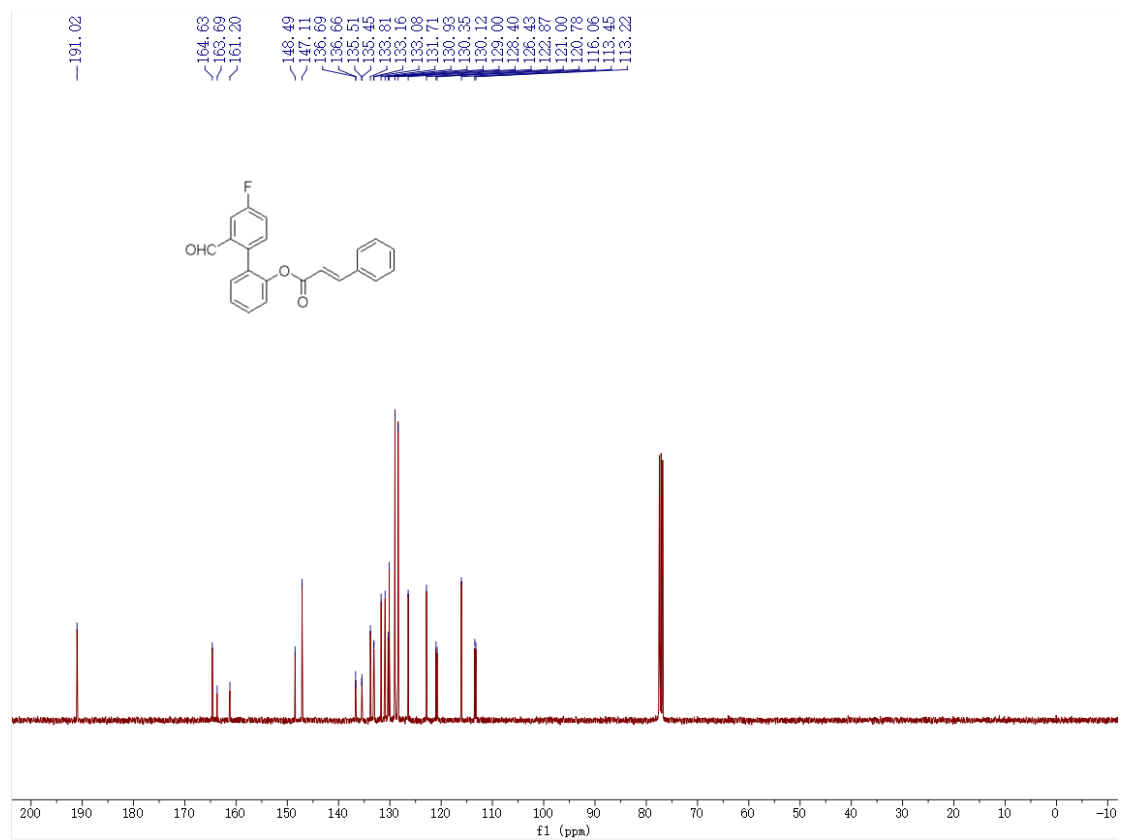

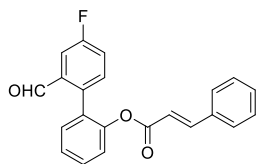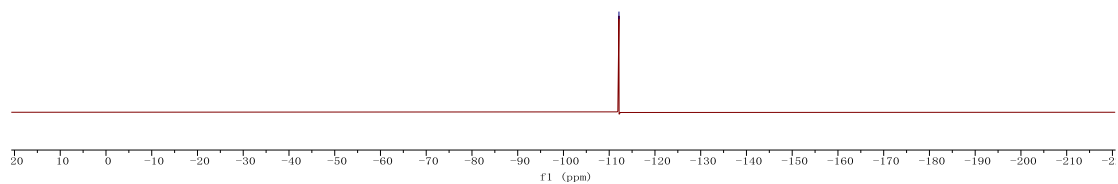

-112.13

5a

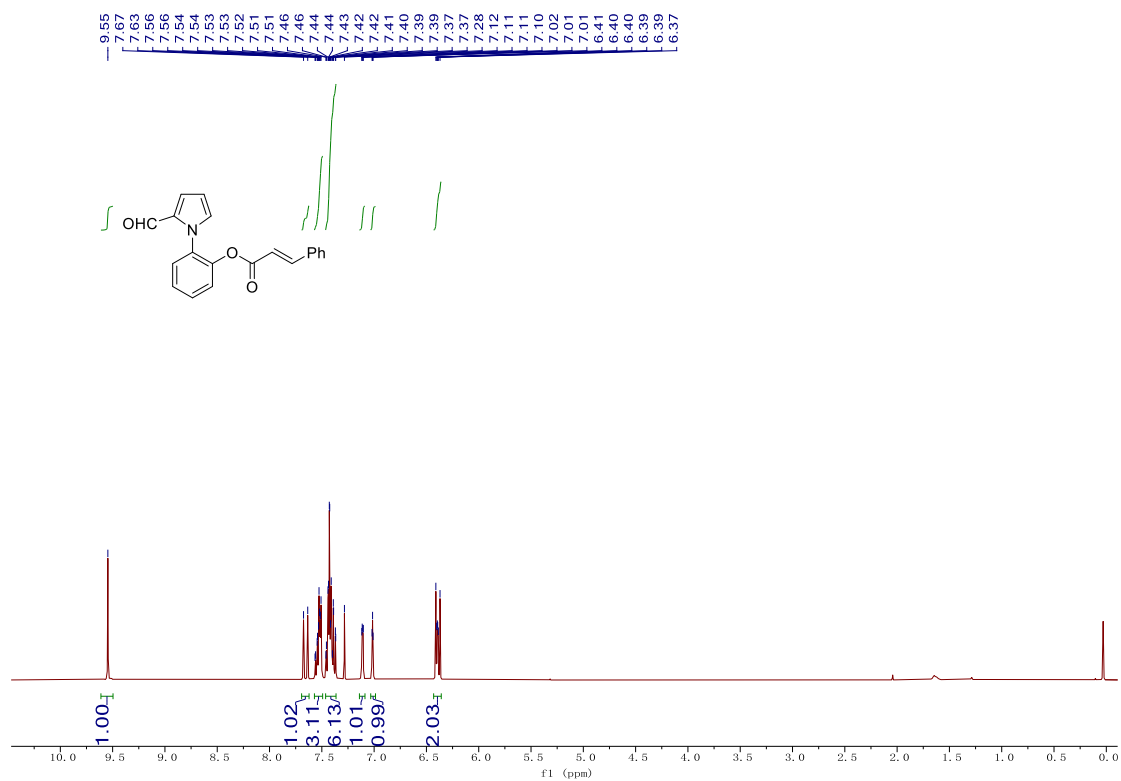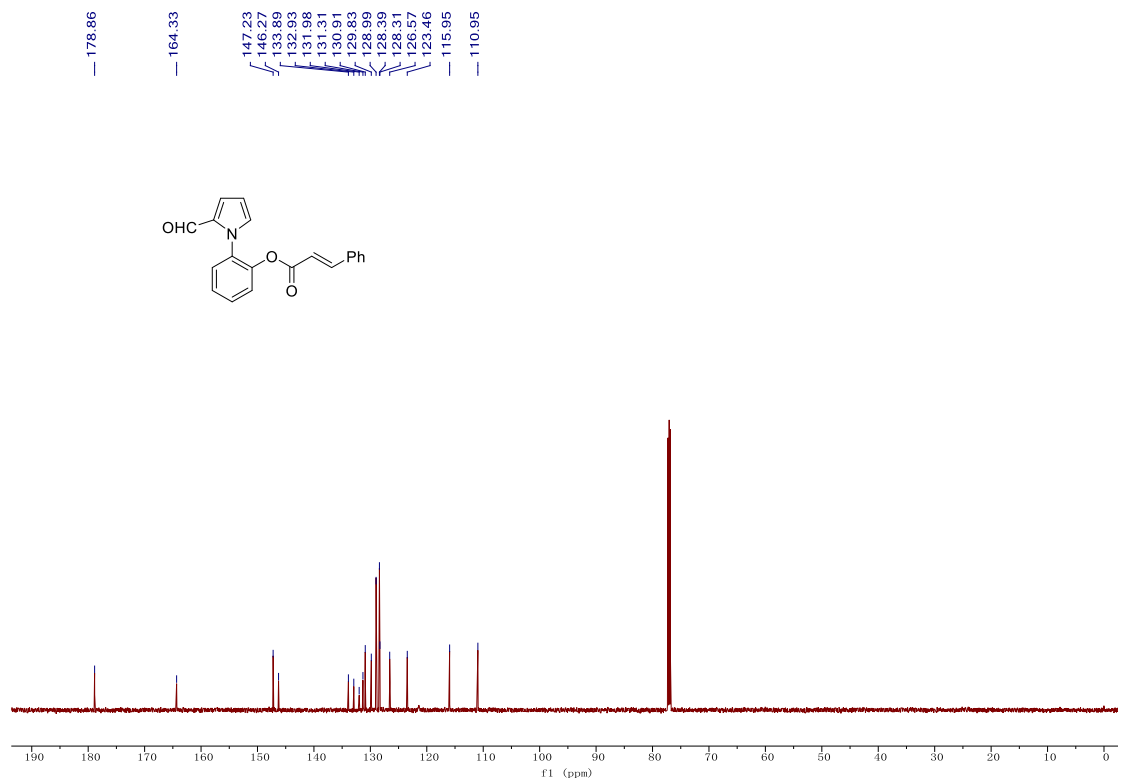

5b

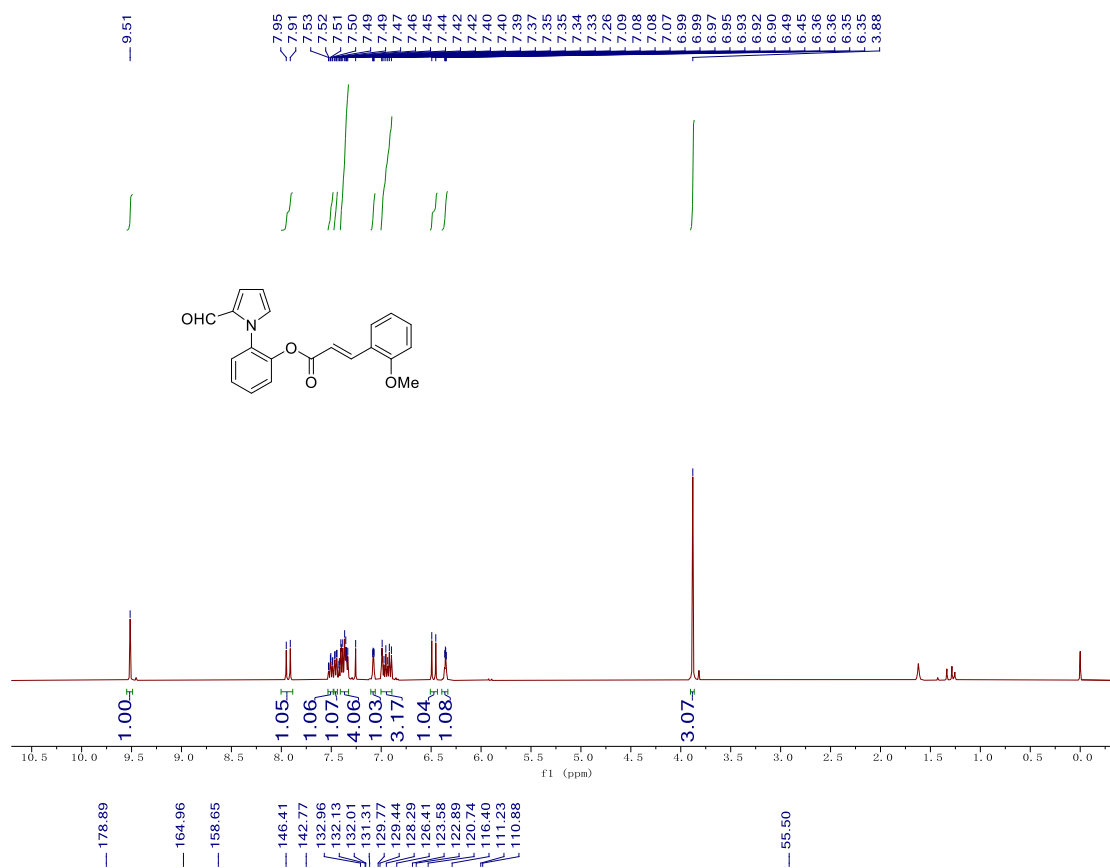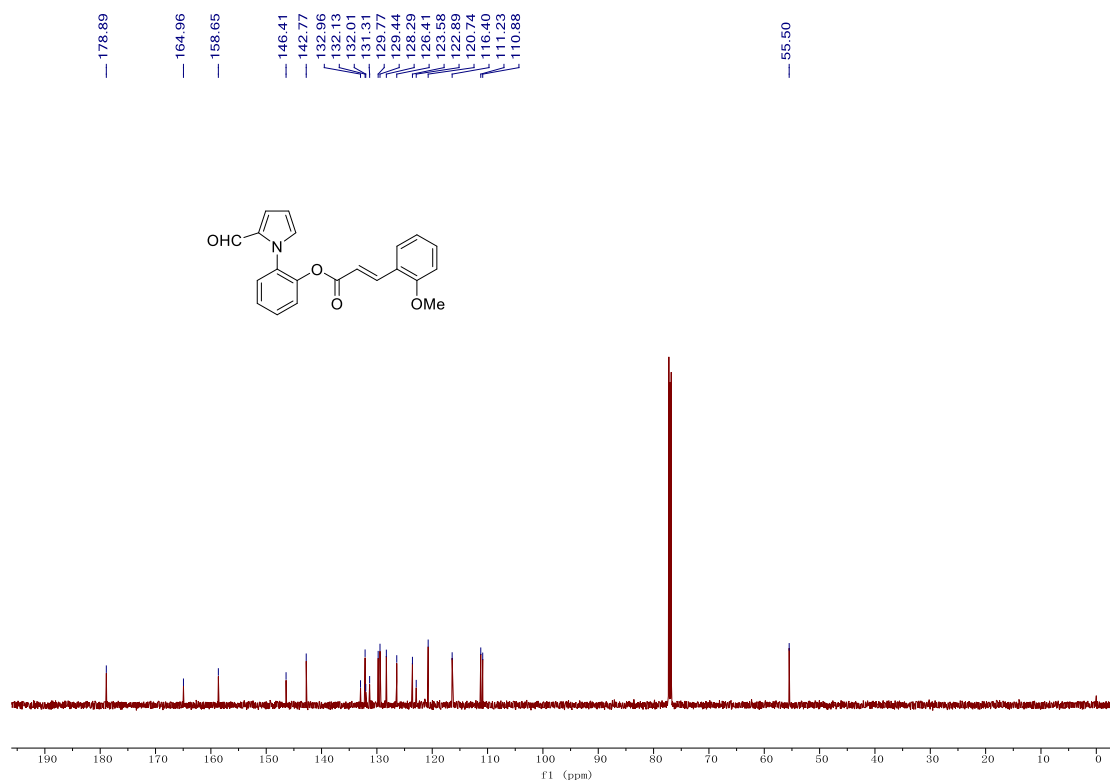

5c

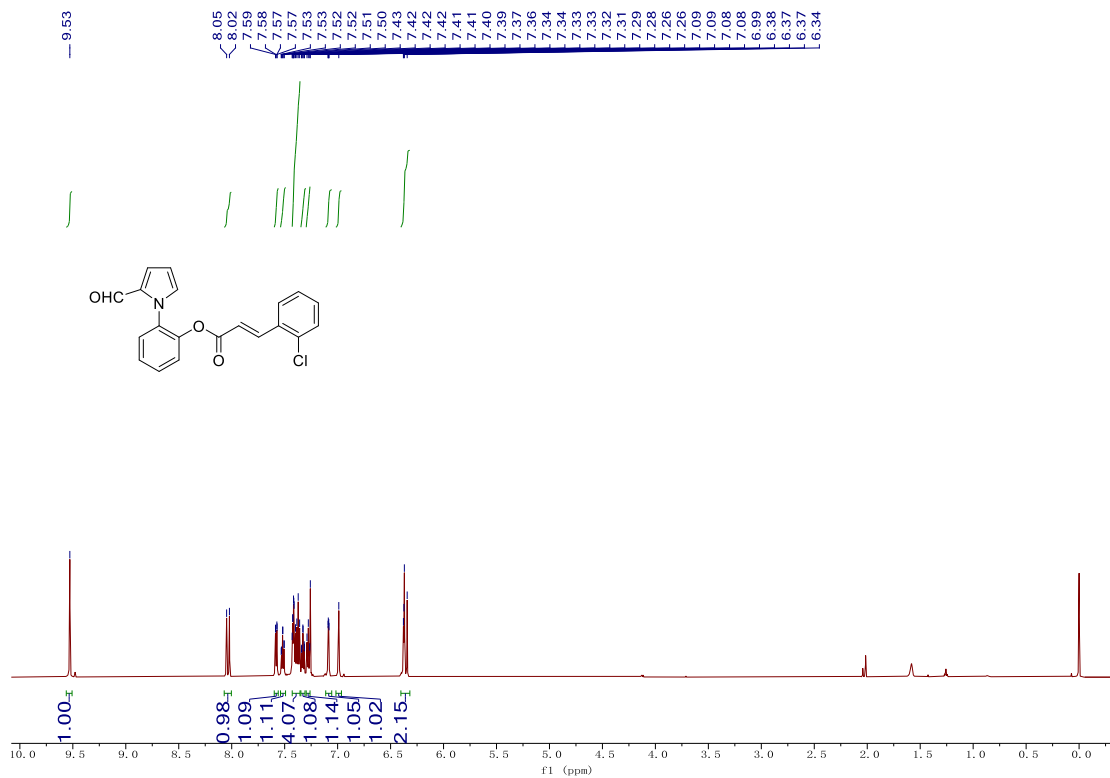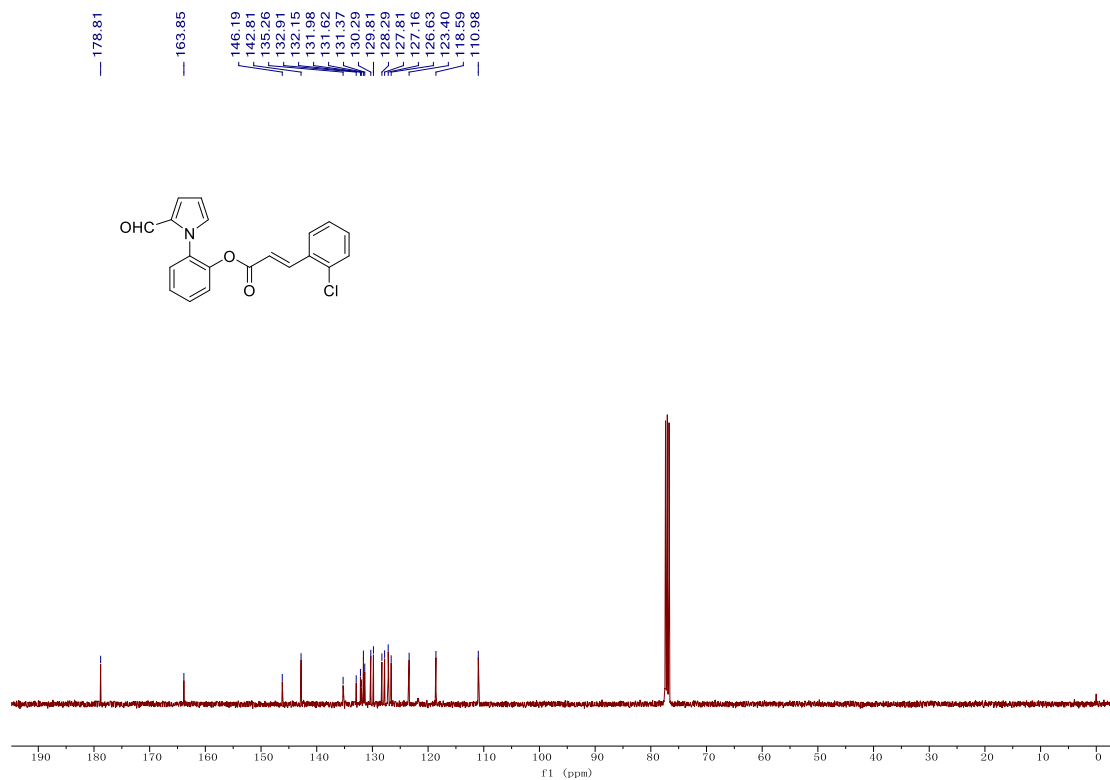

5d

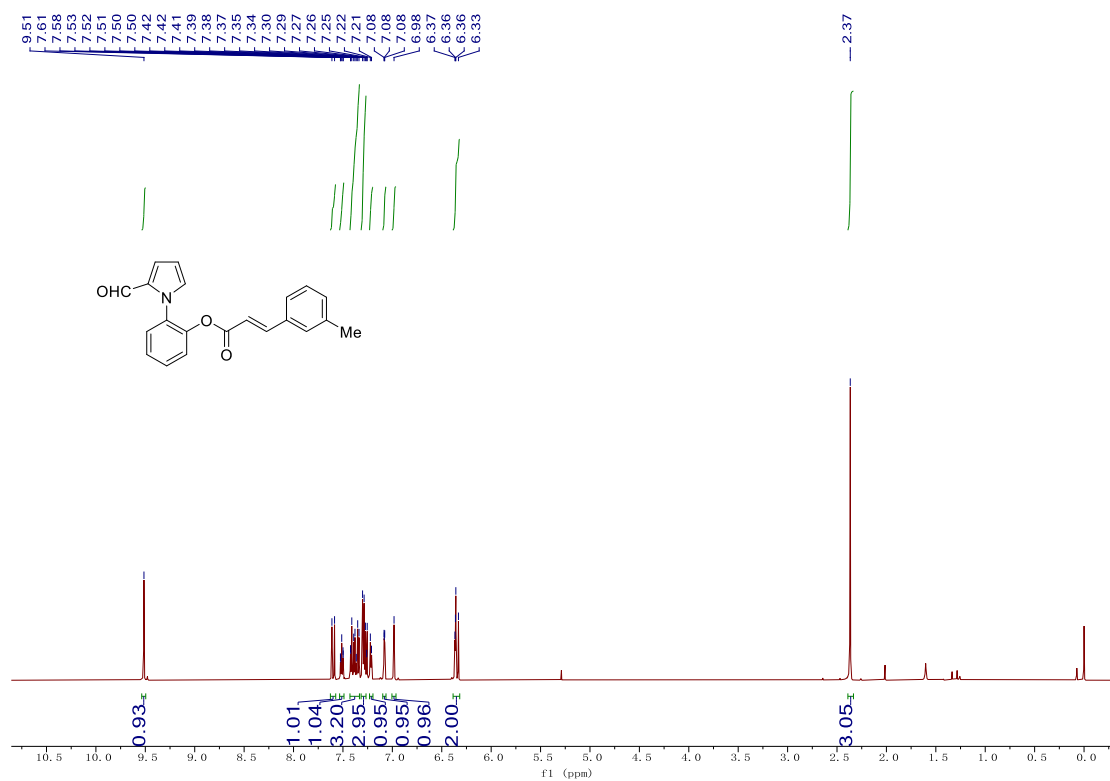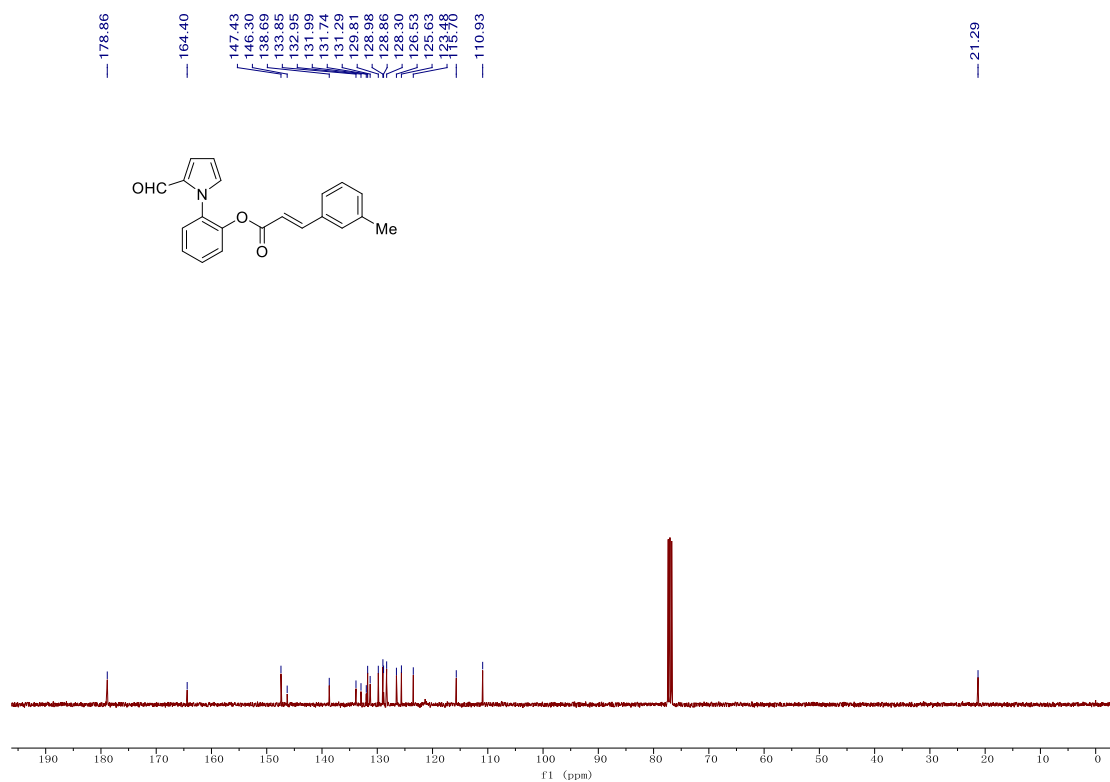

5e

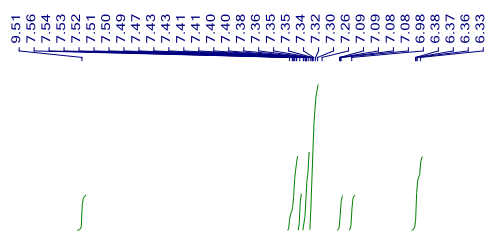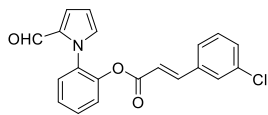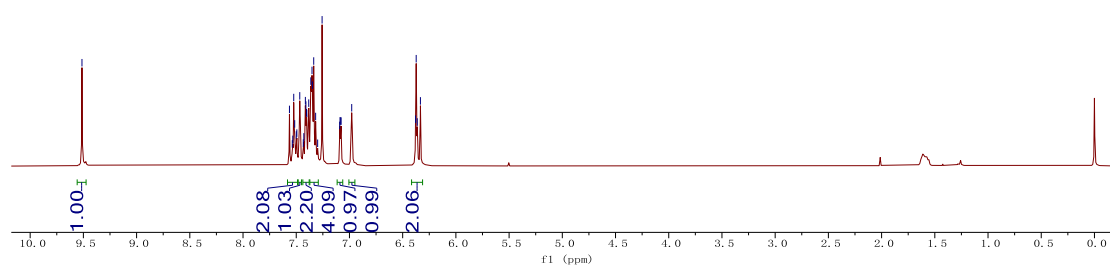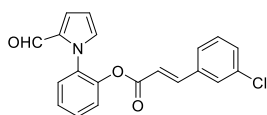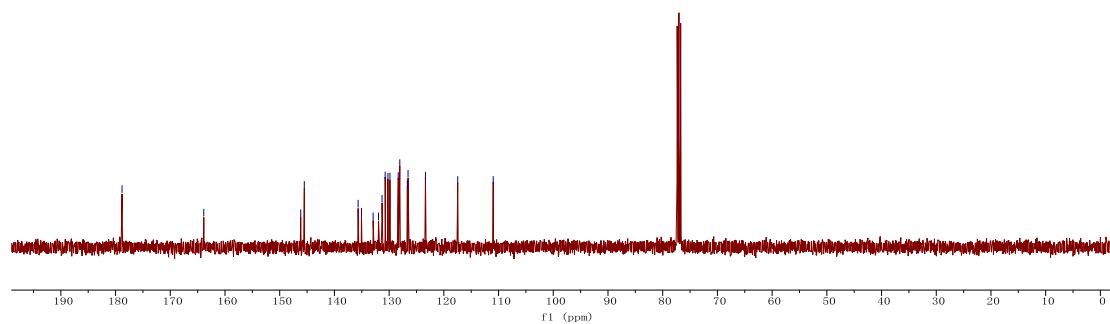

5f

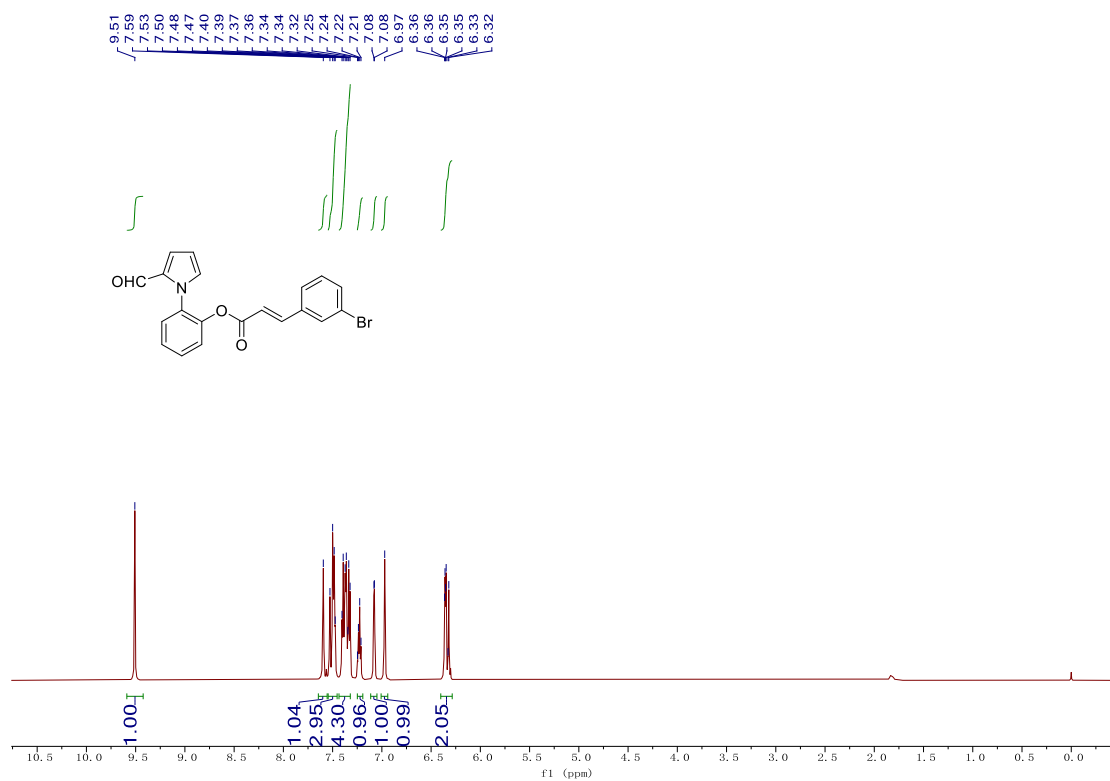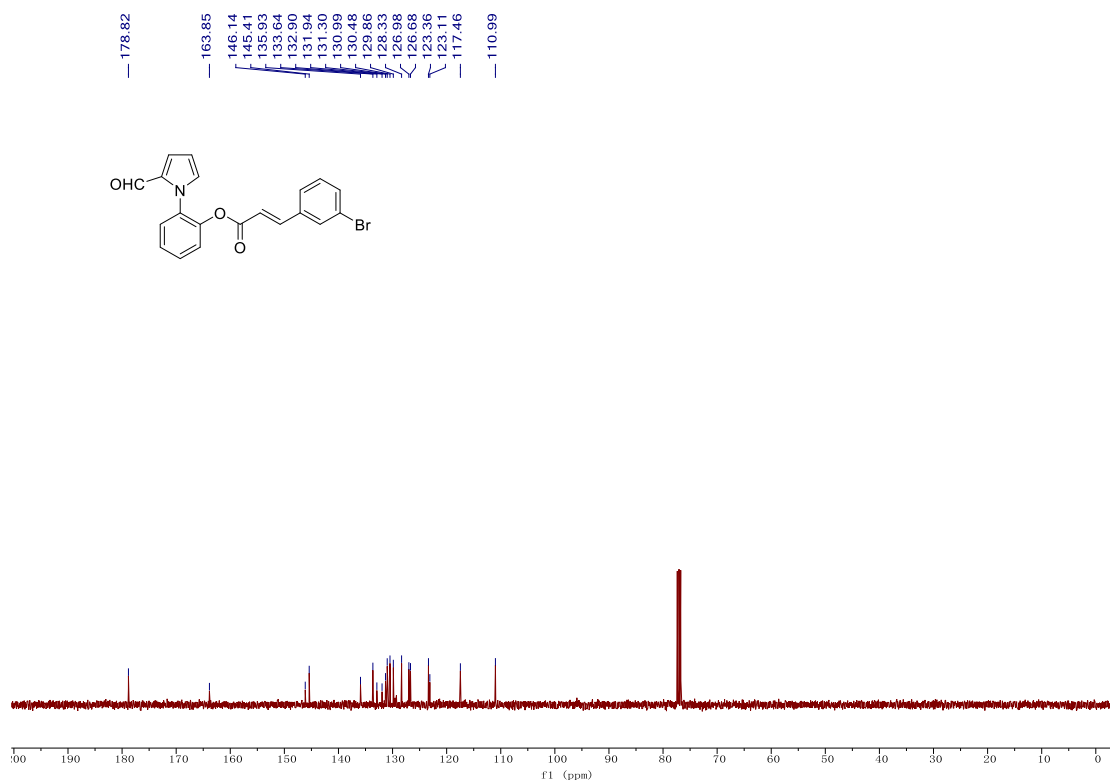



5g

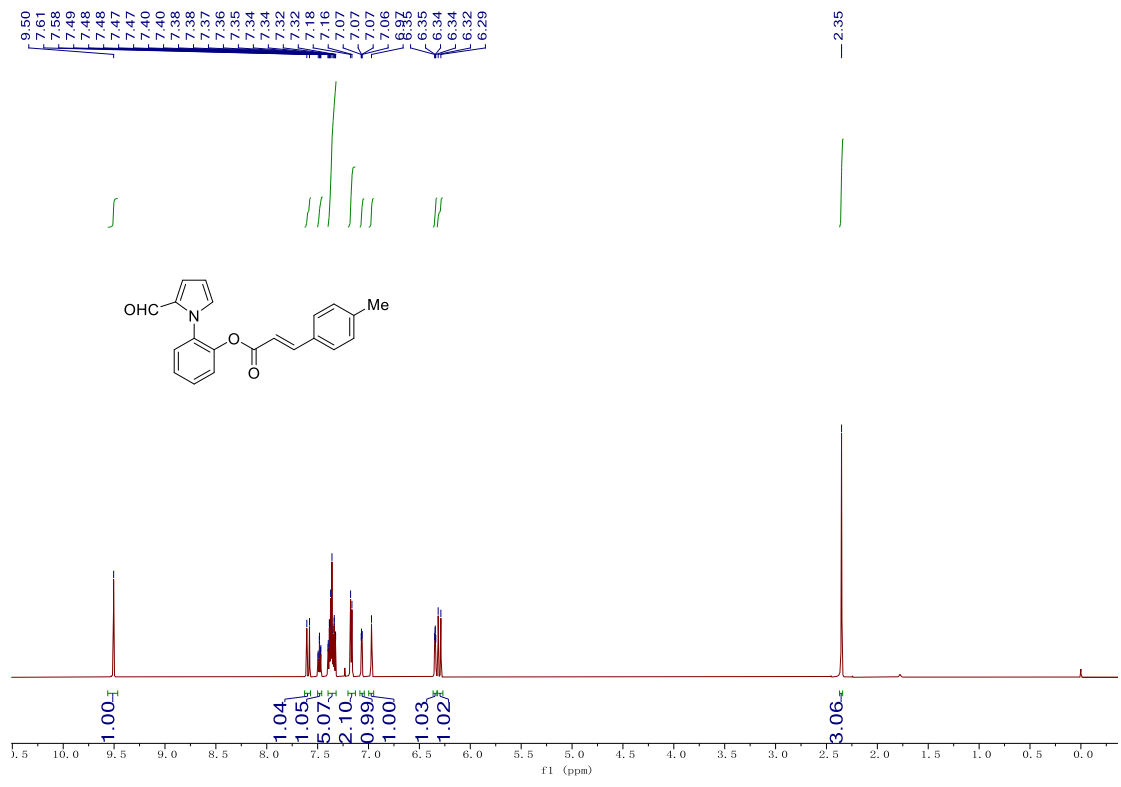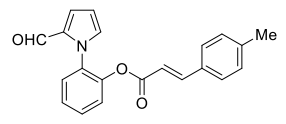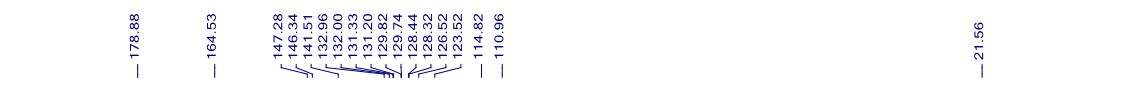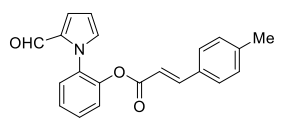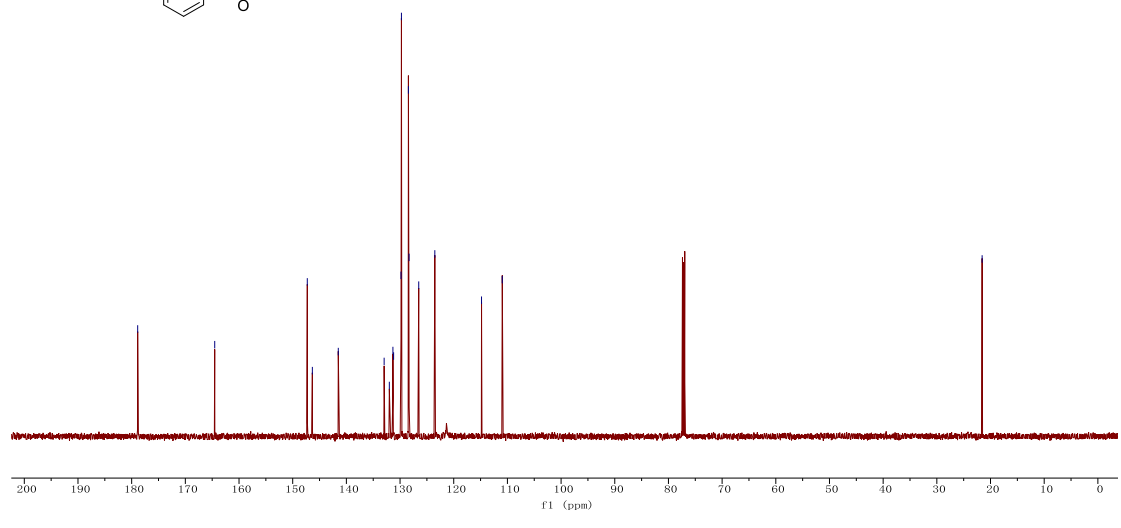

5h

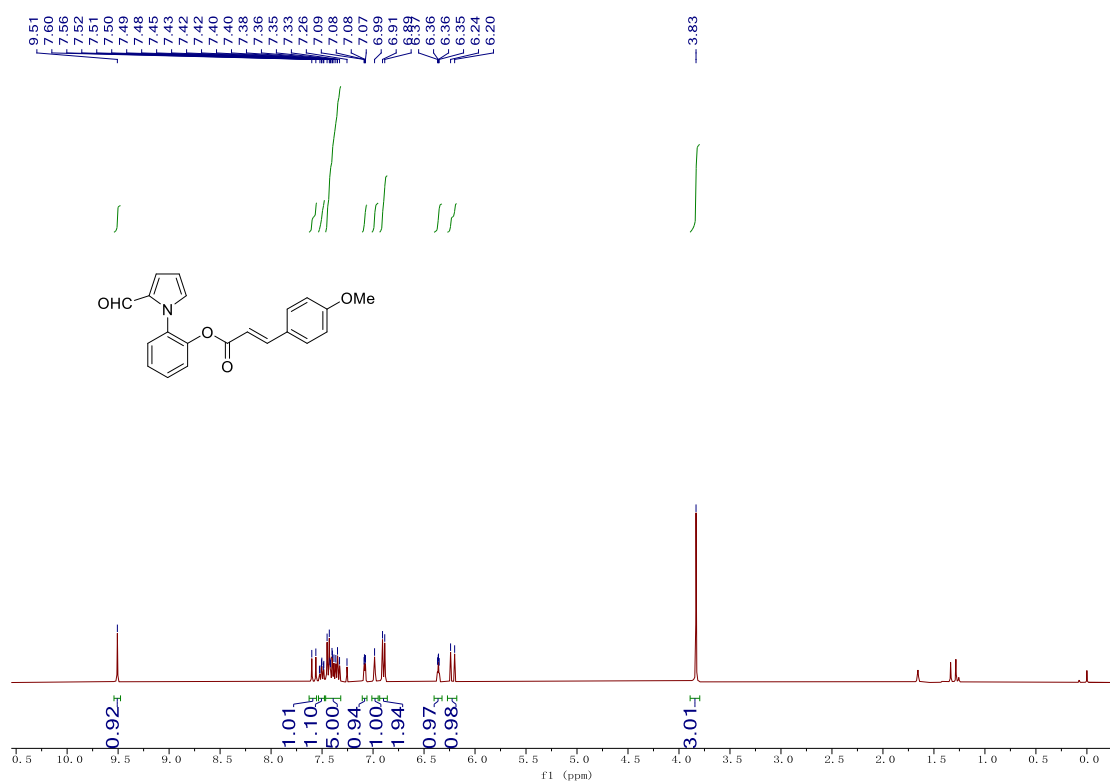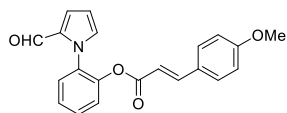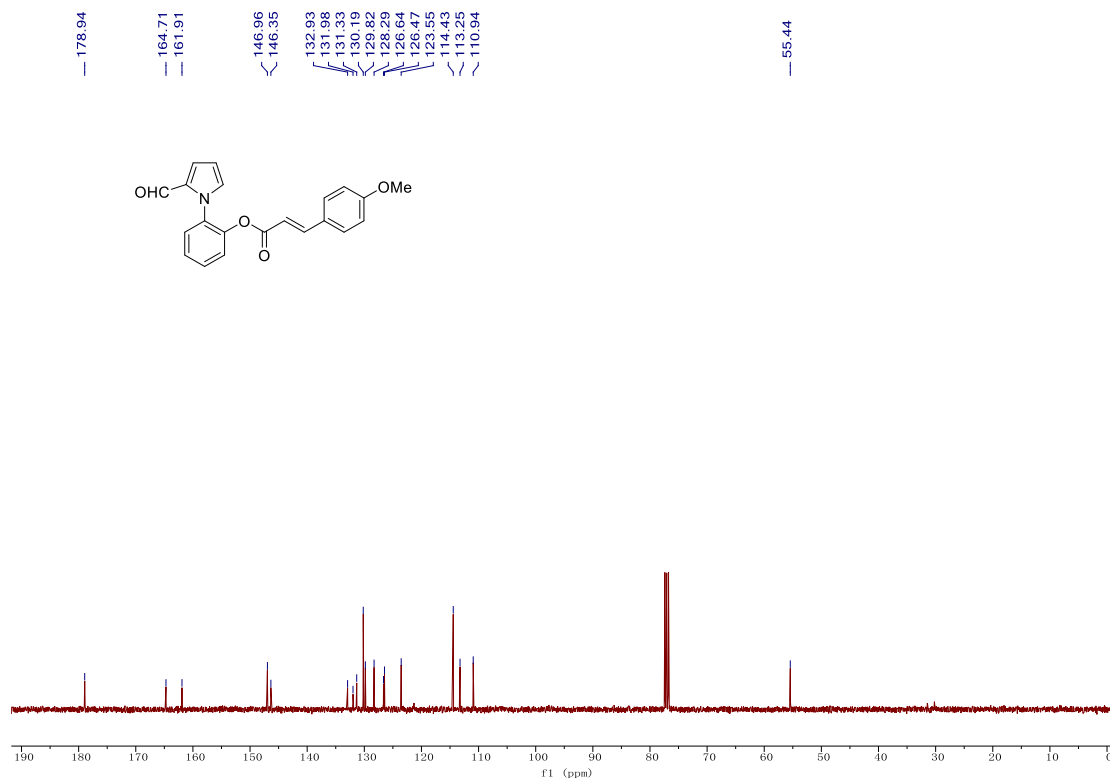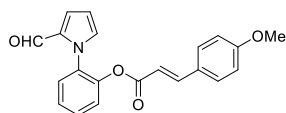

5i

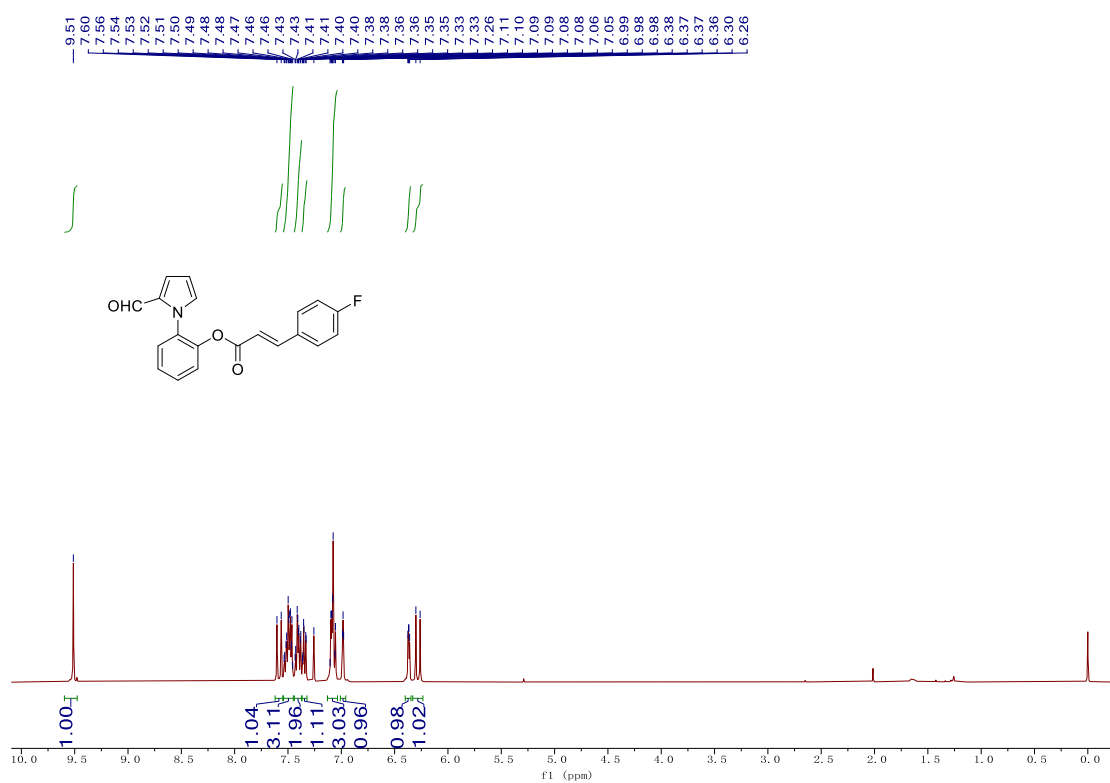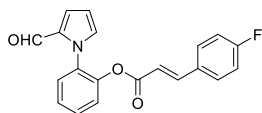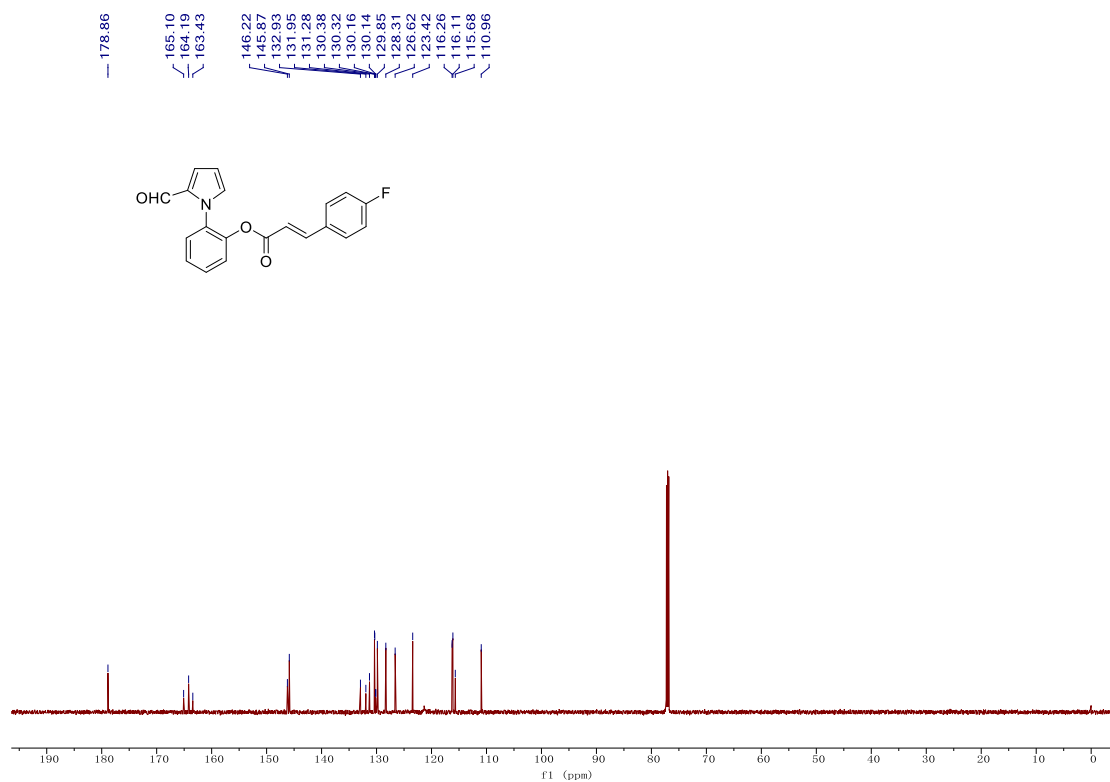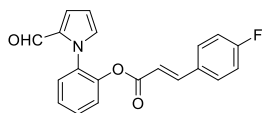

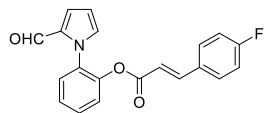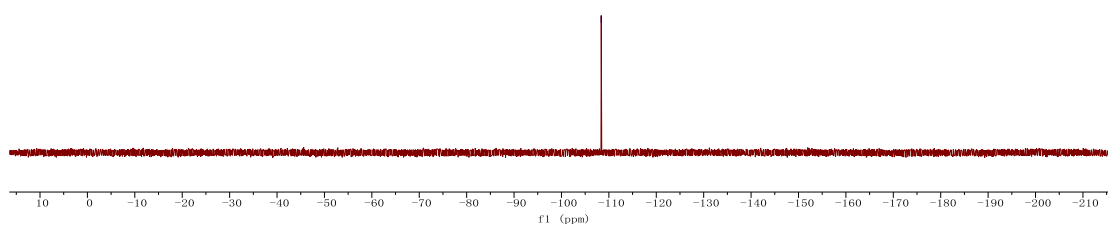

-108.39

5j

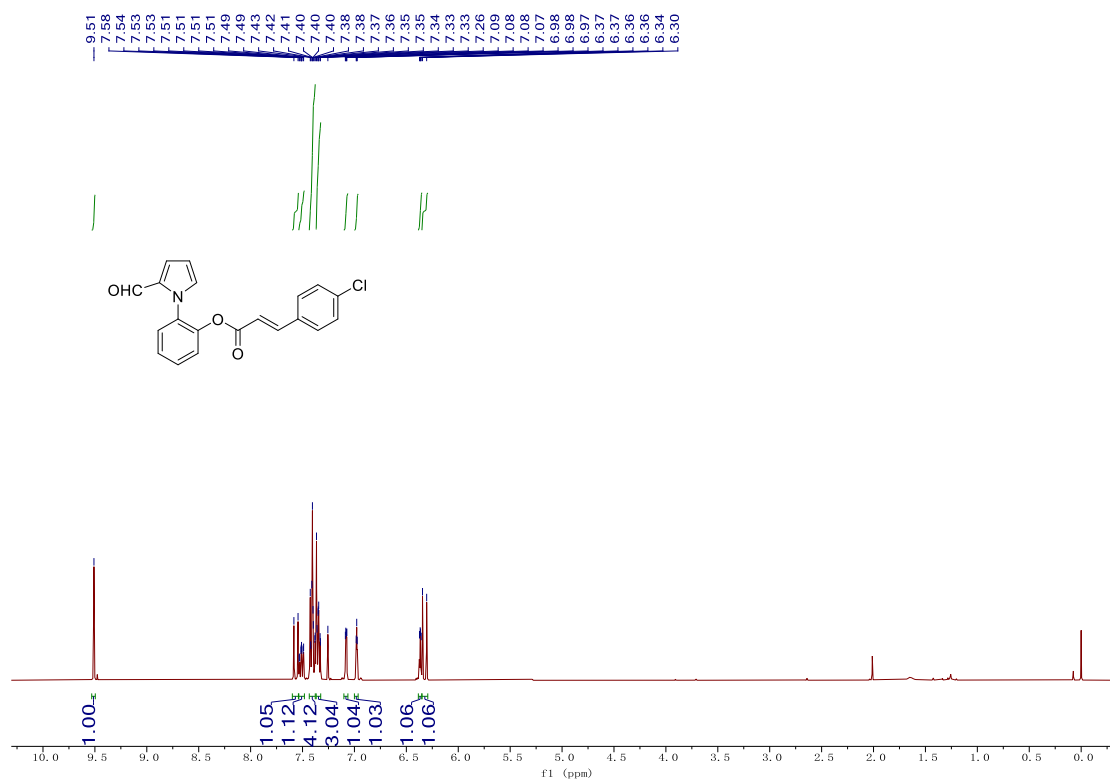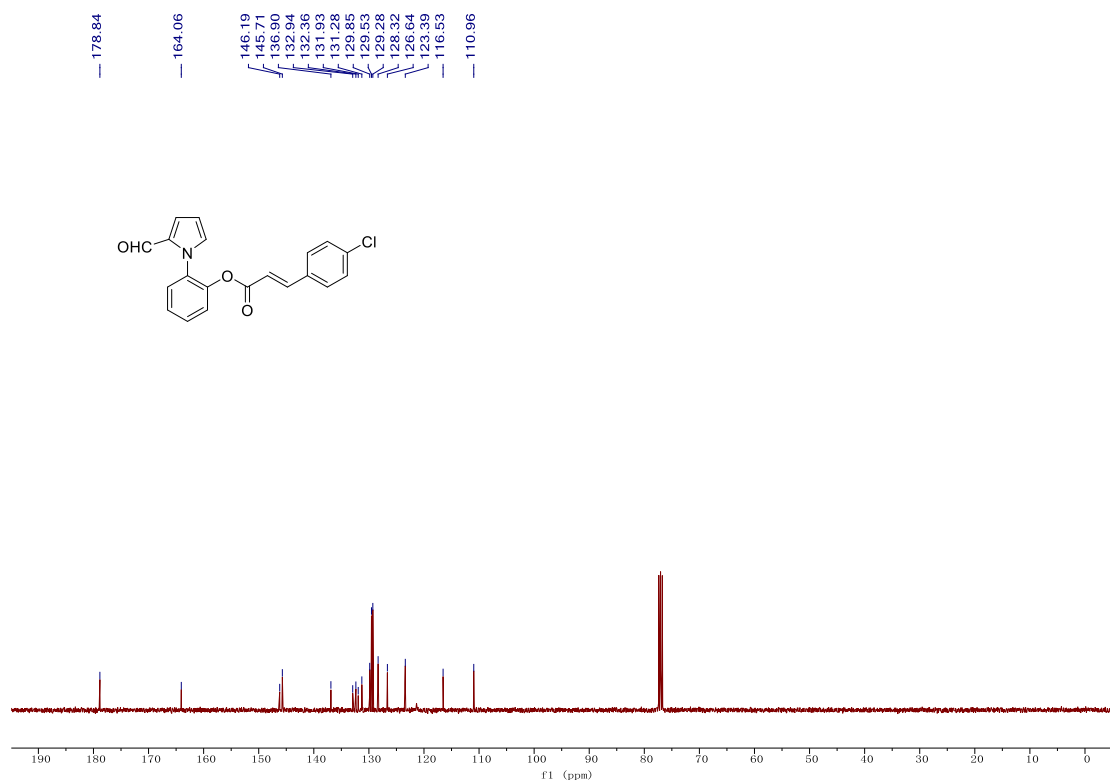

5k

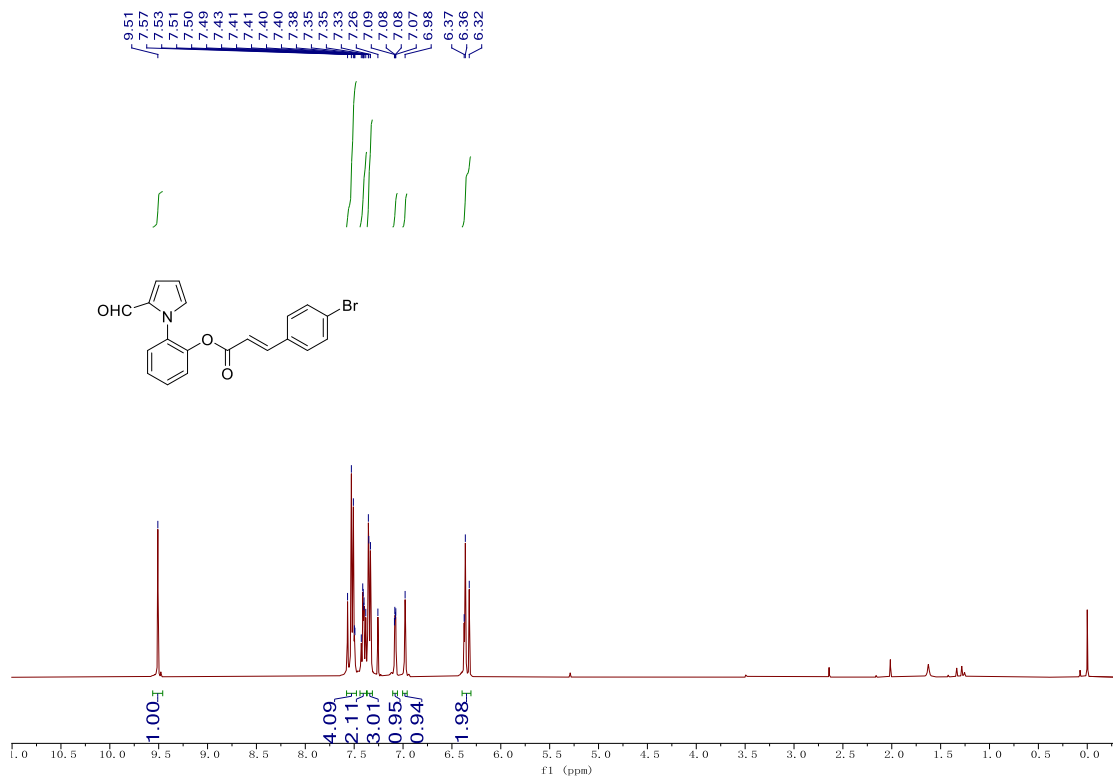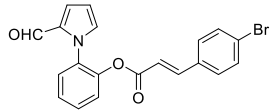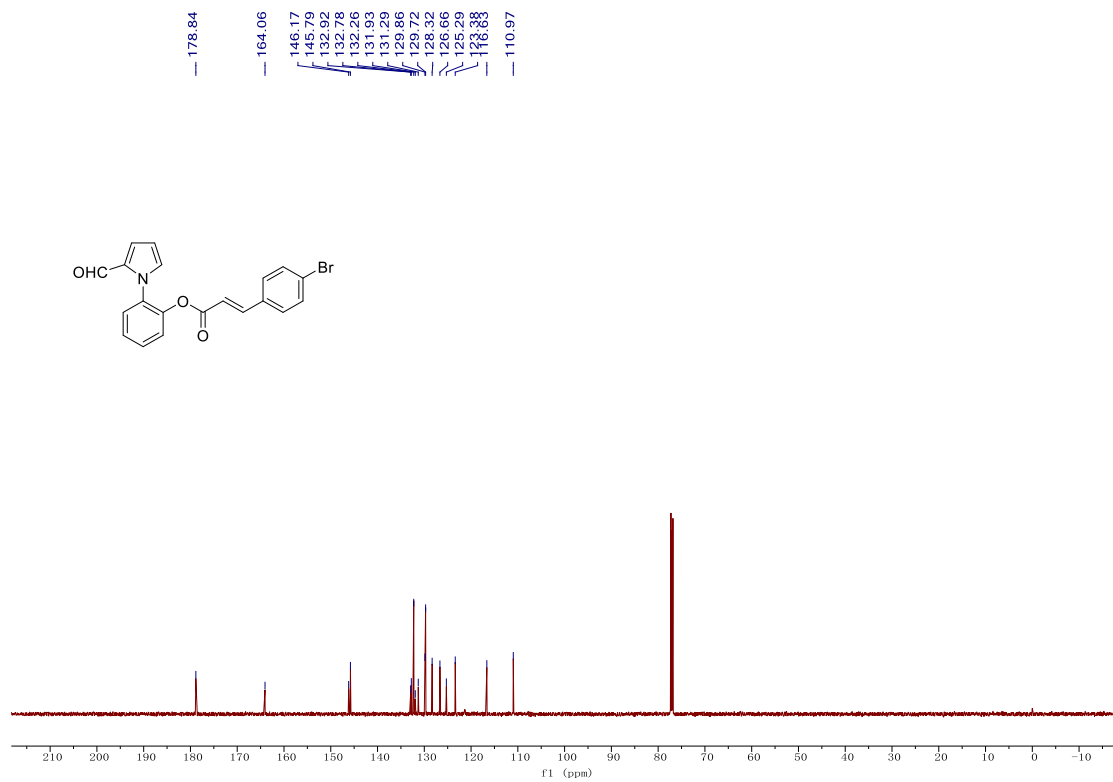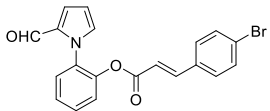

51

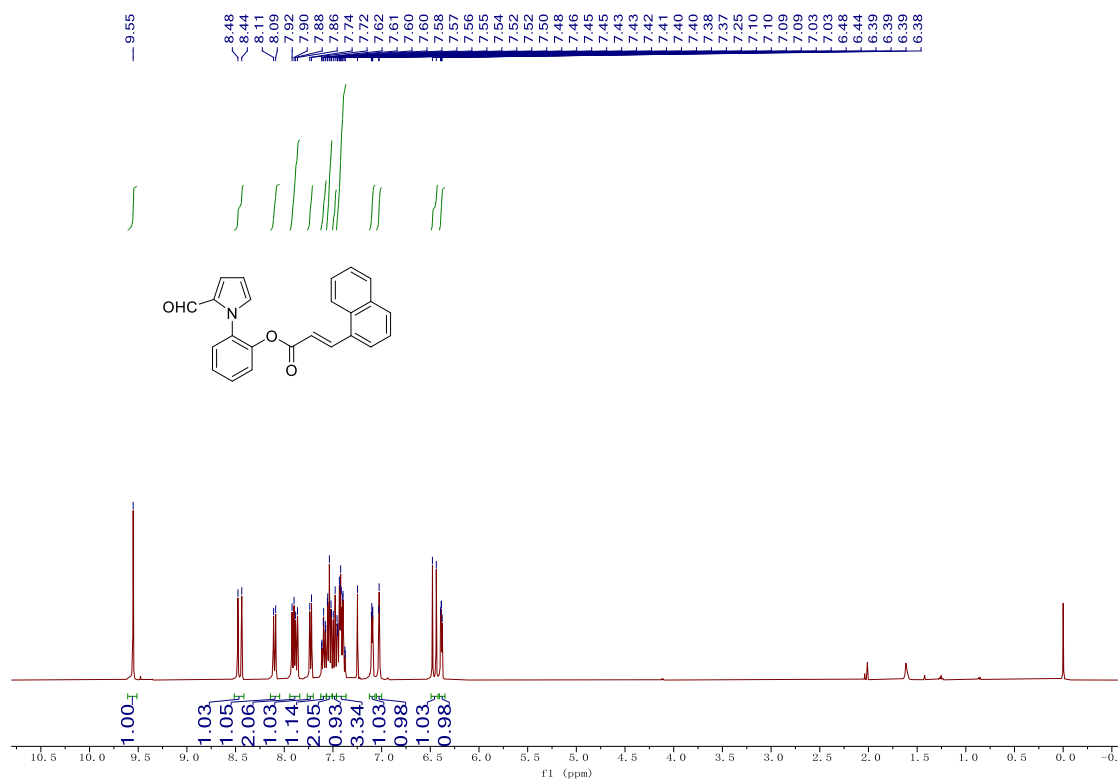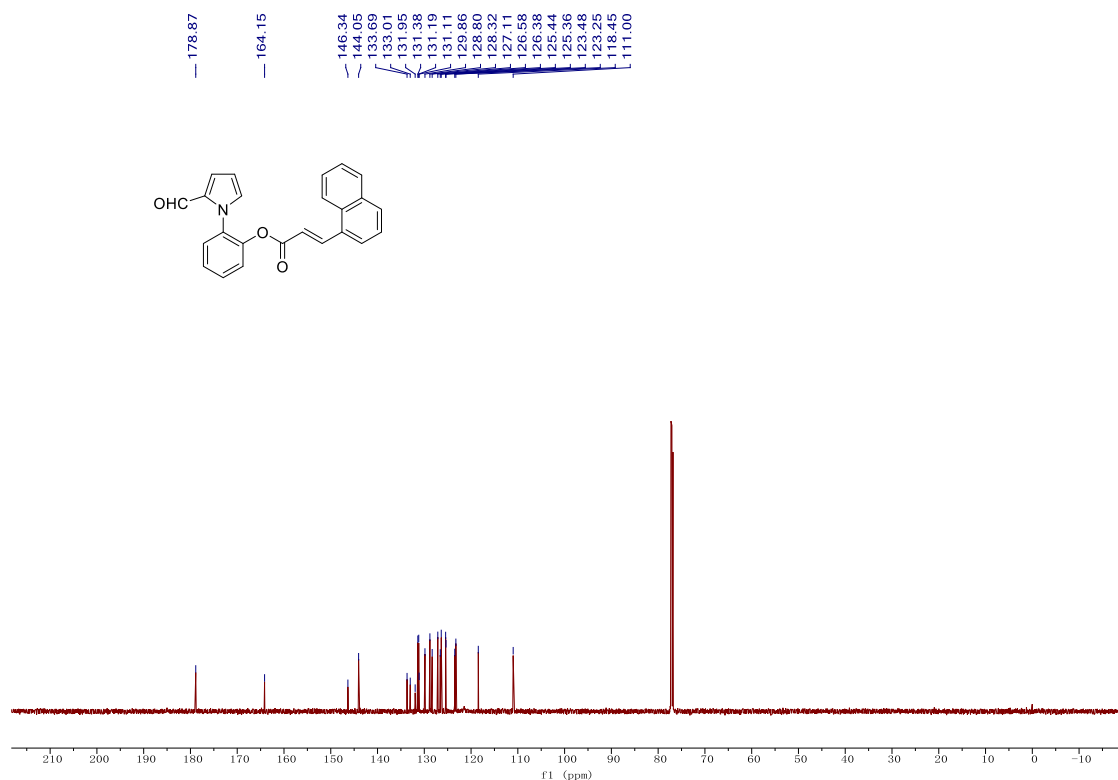

5m

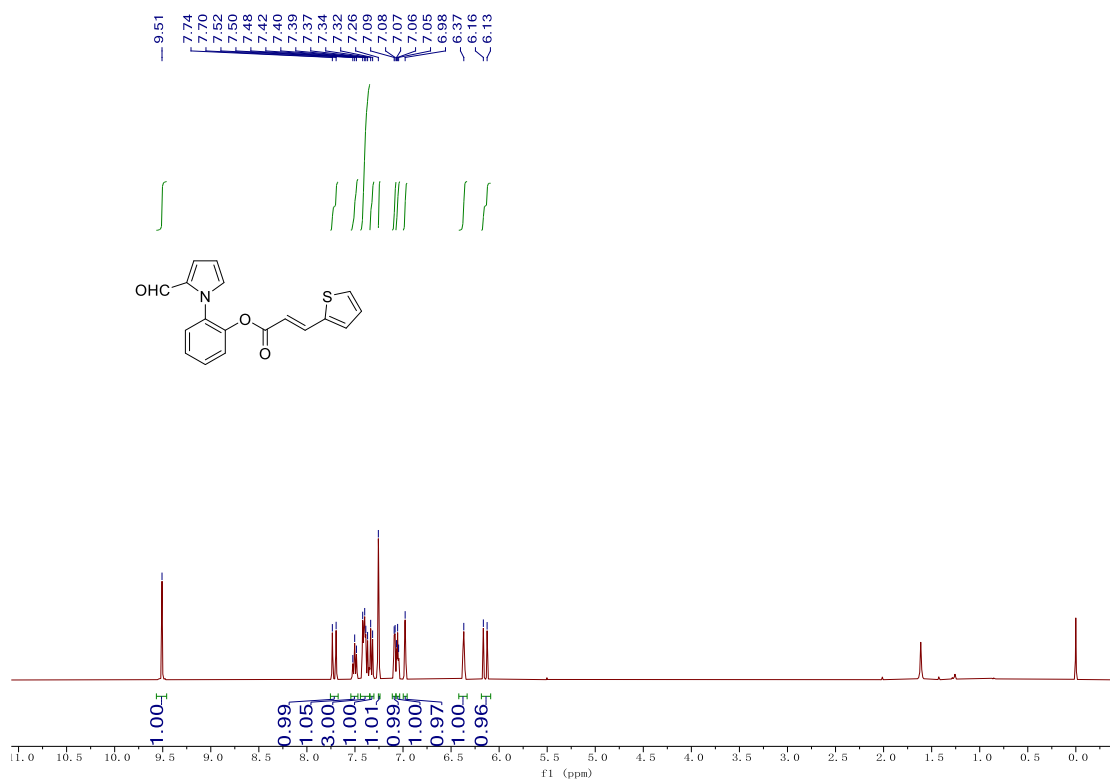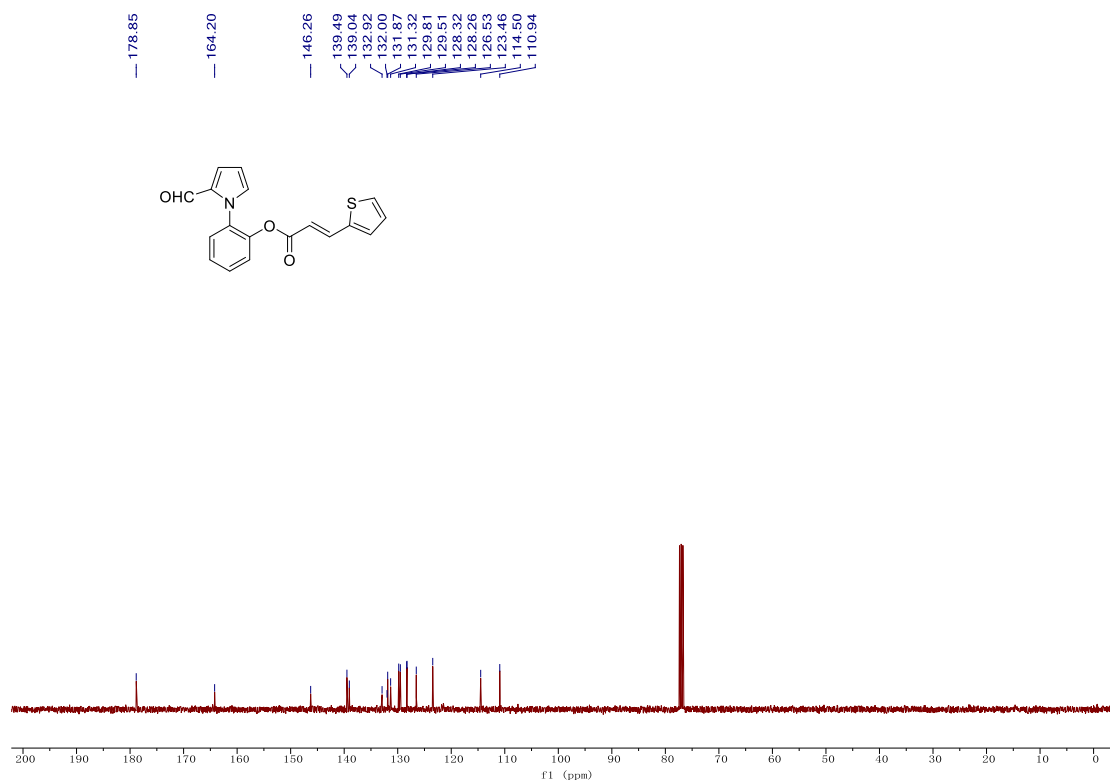



5n

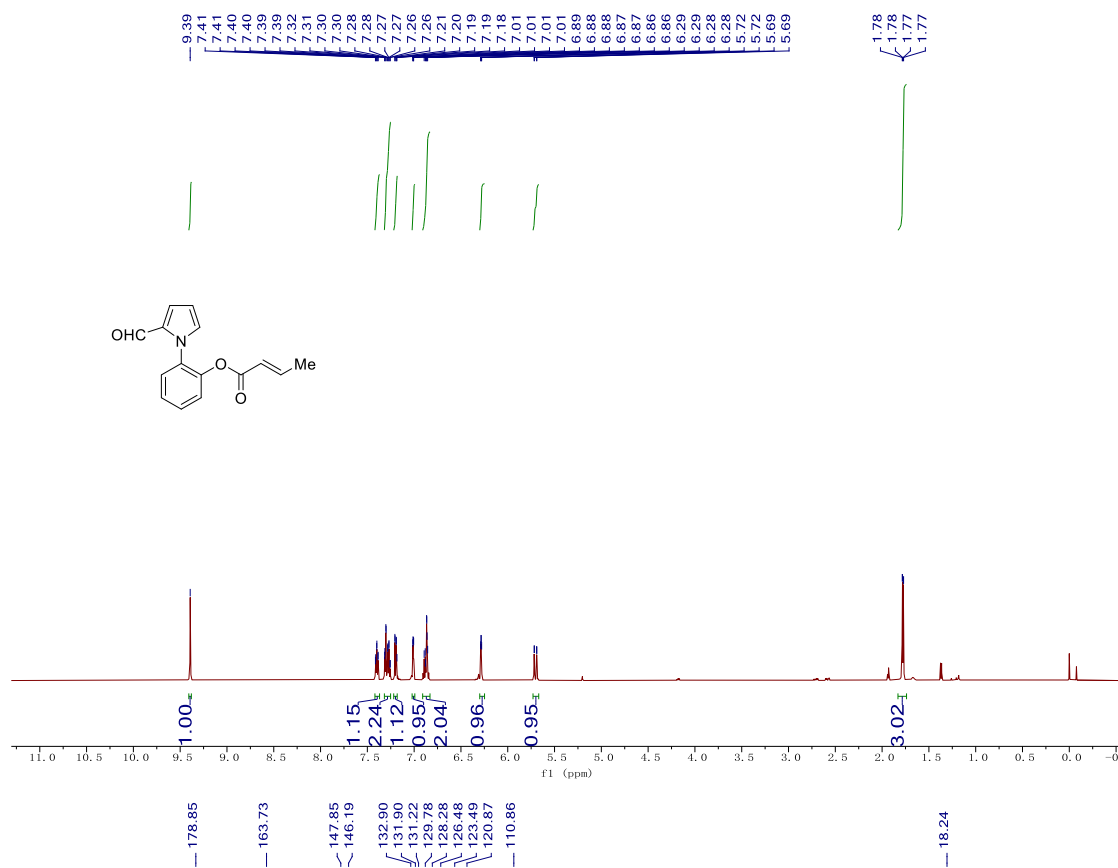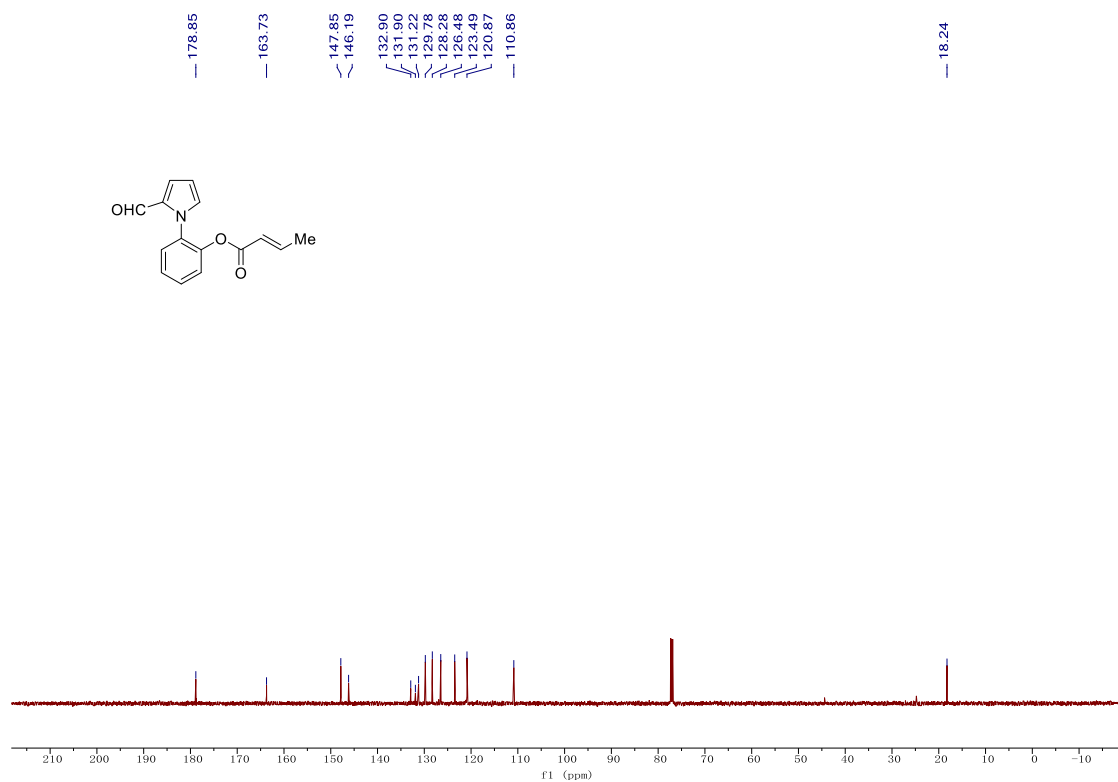

50

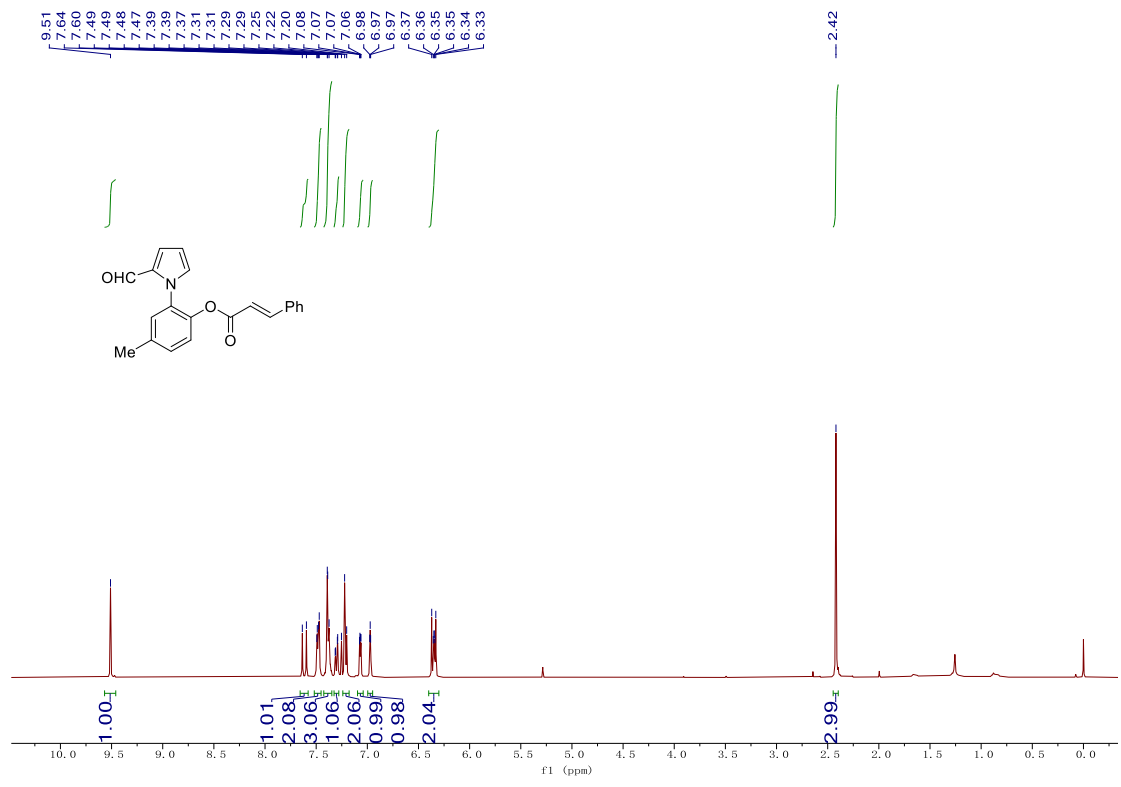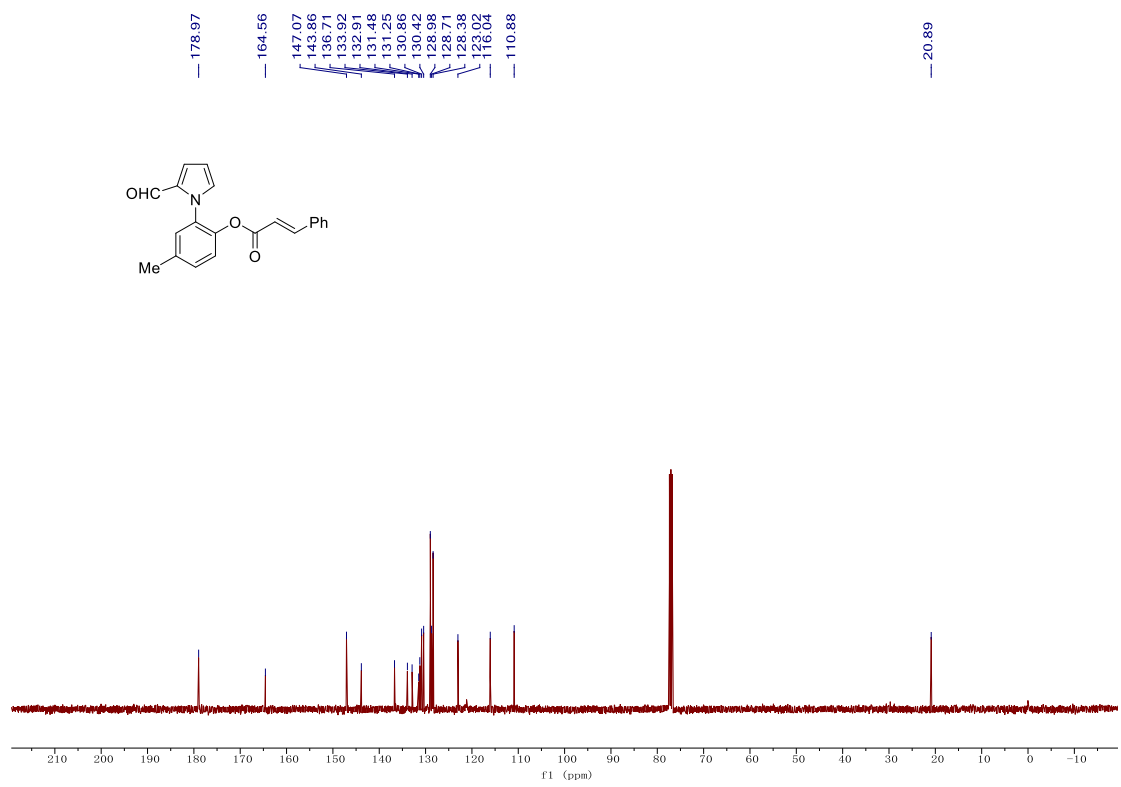

5p

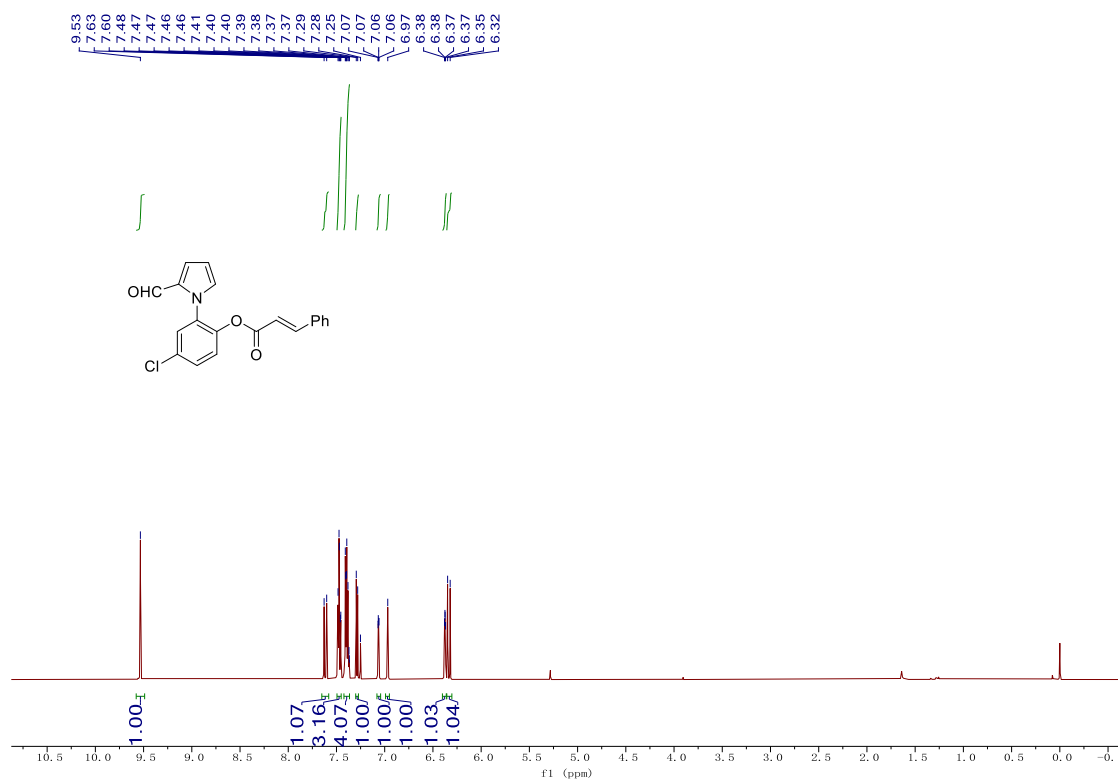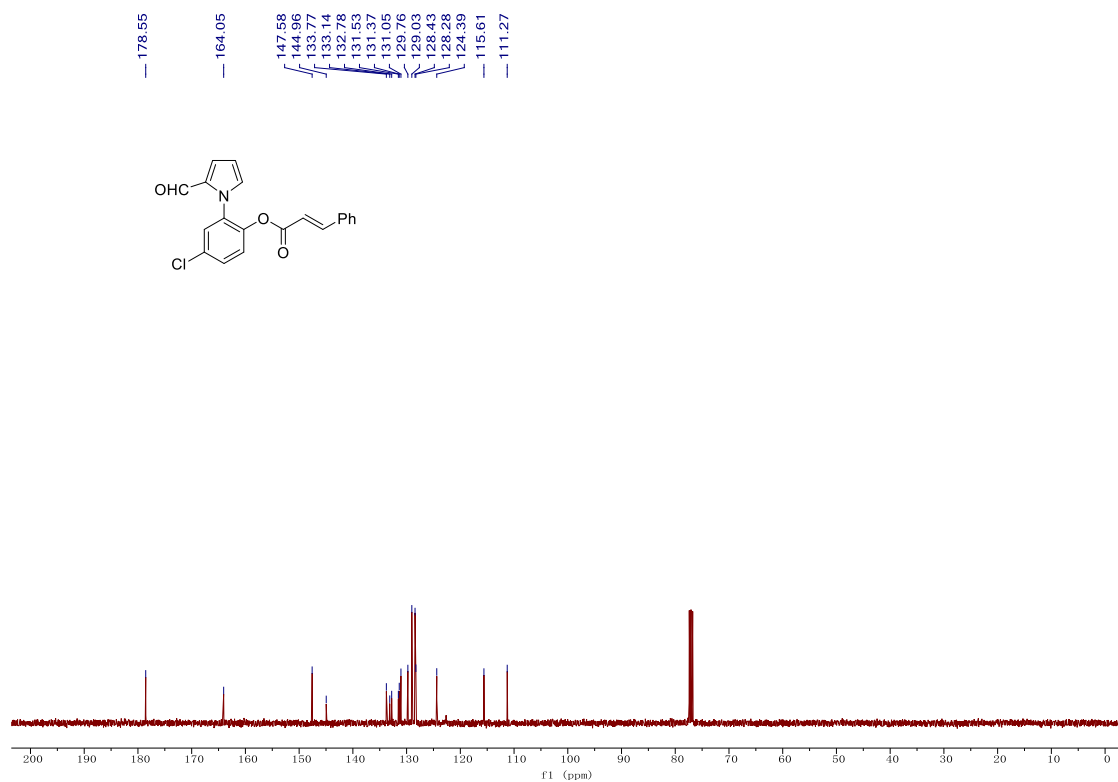

5q

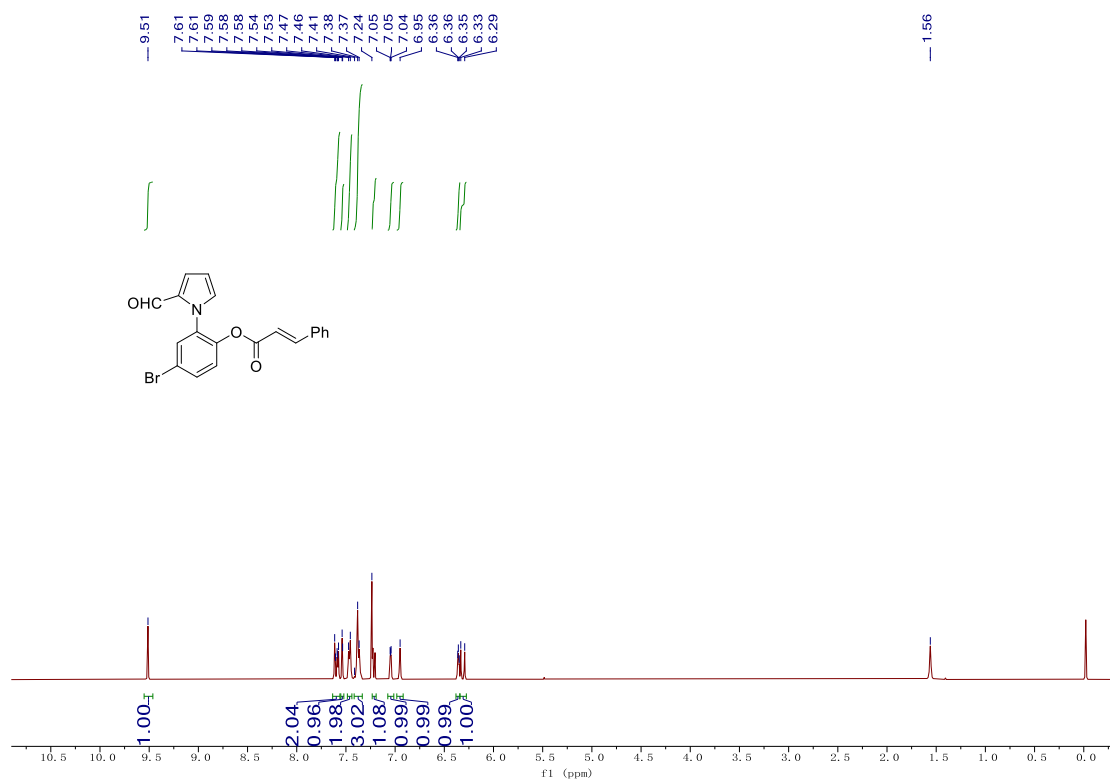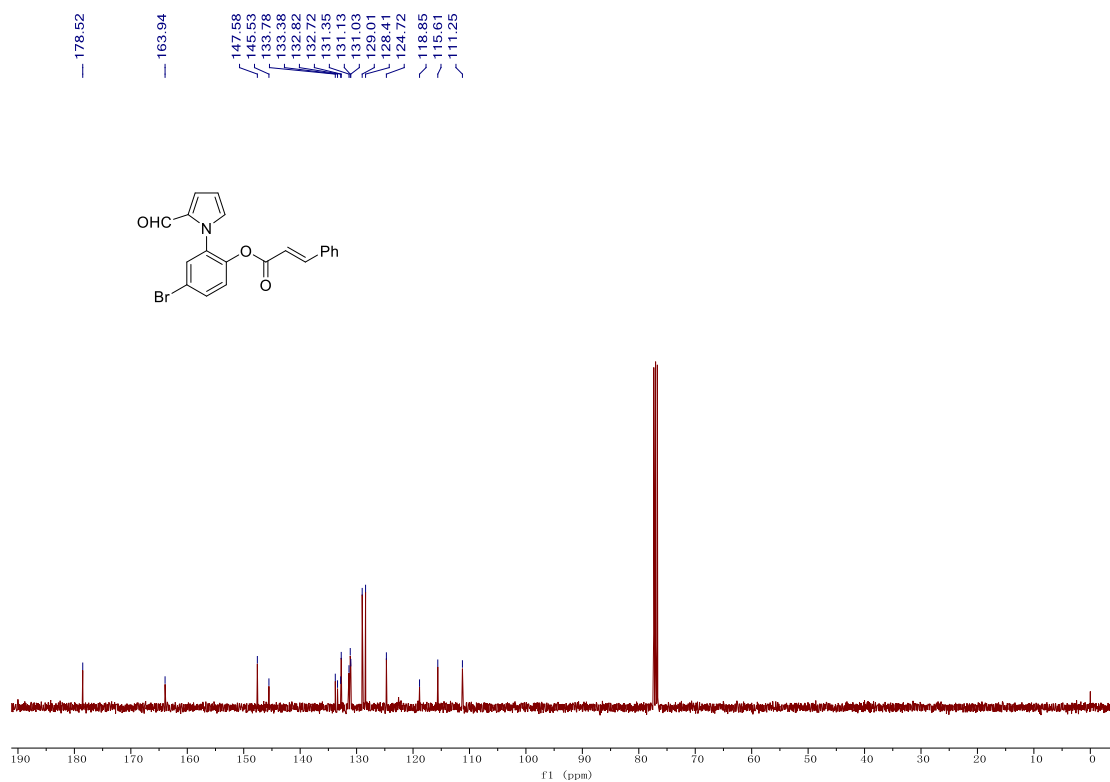

5r

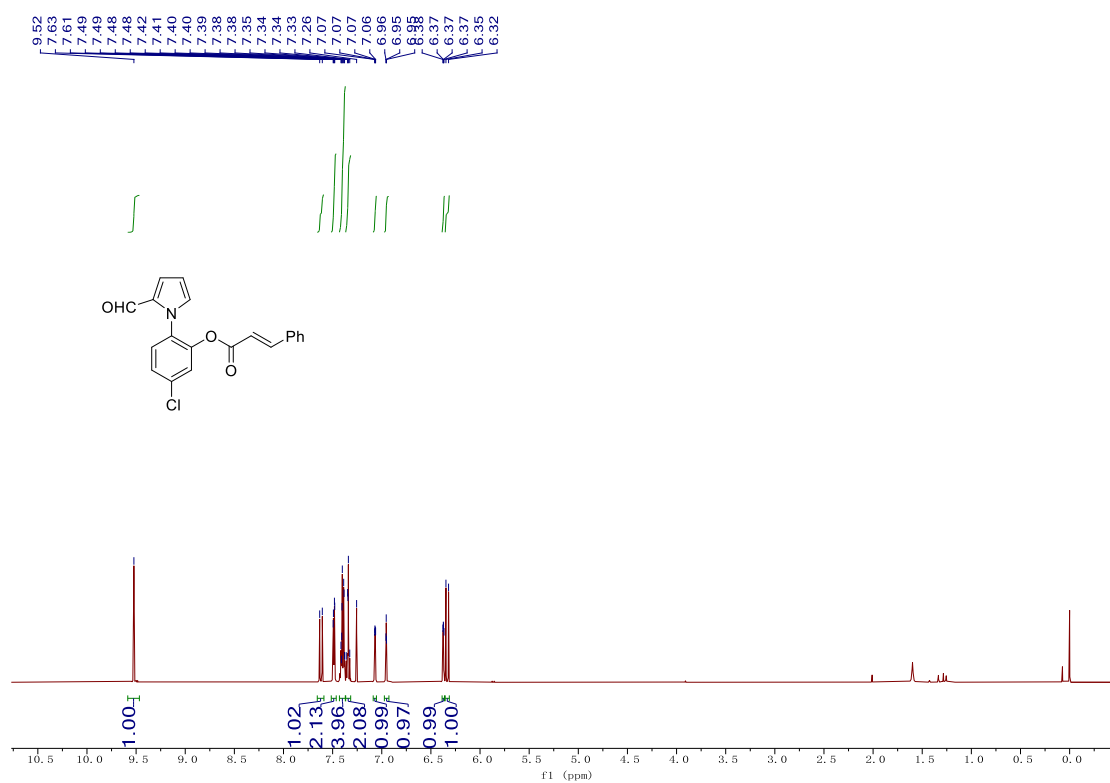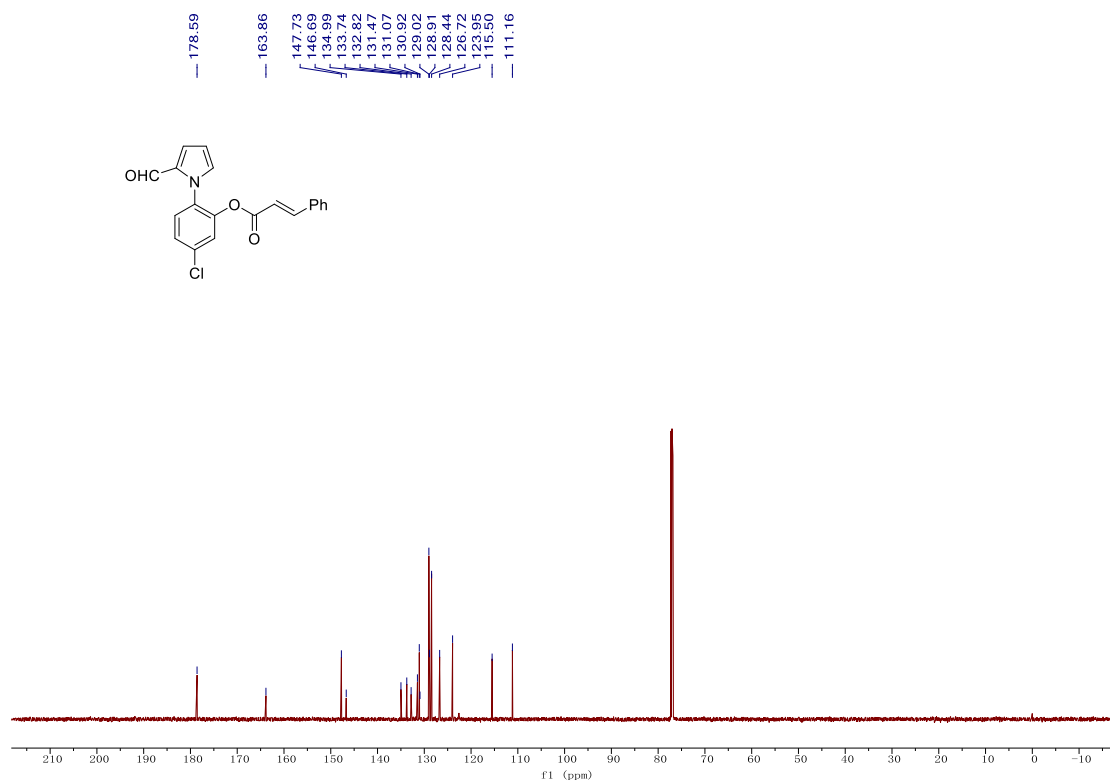

5s

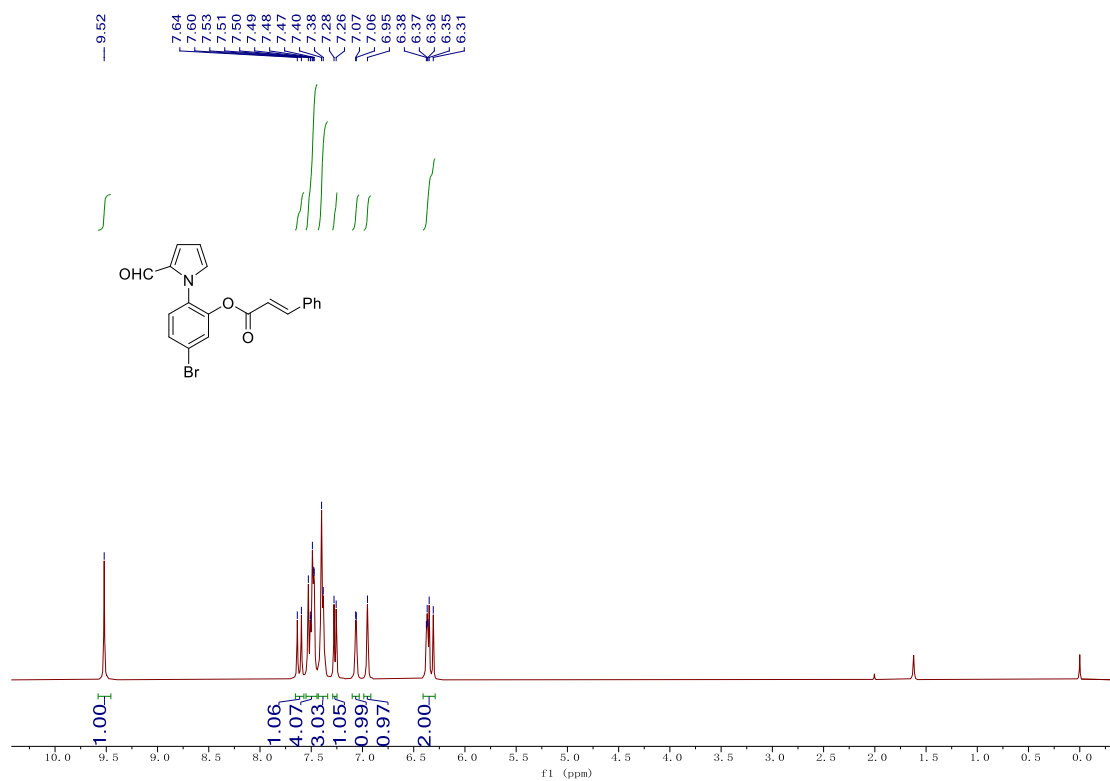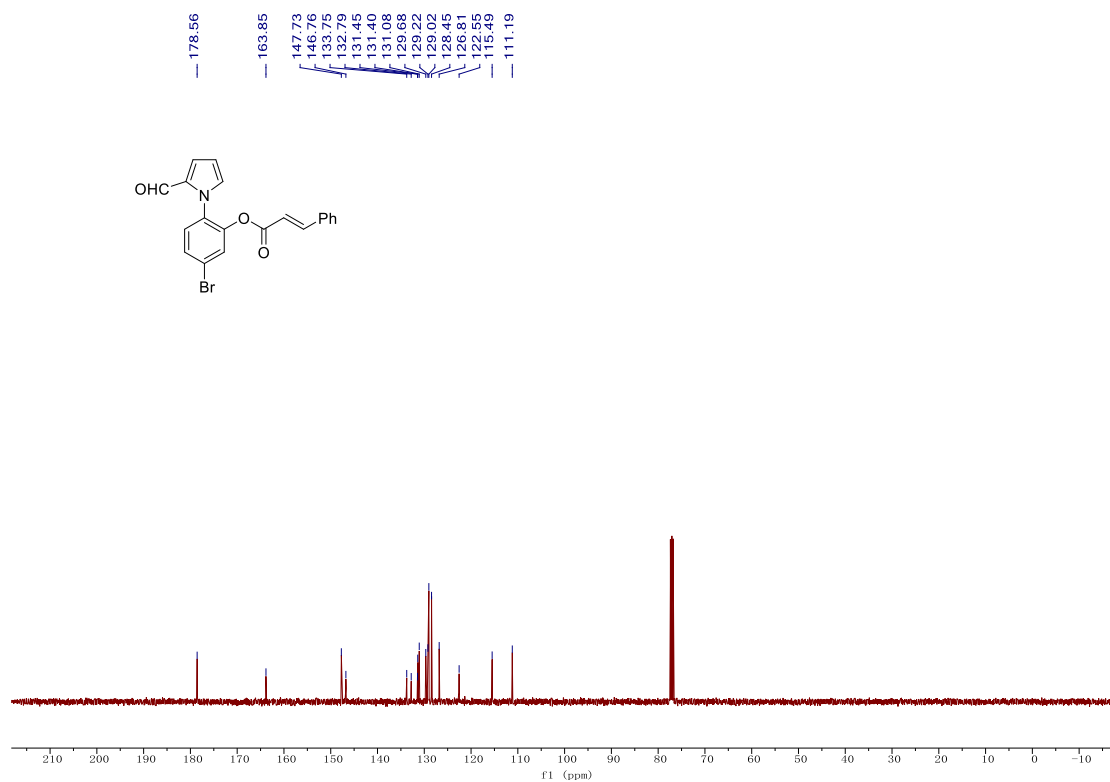

4aa

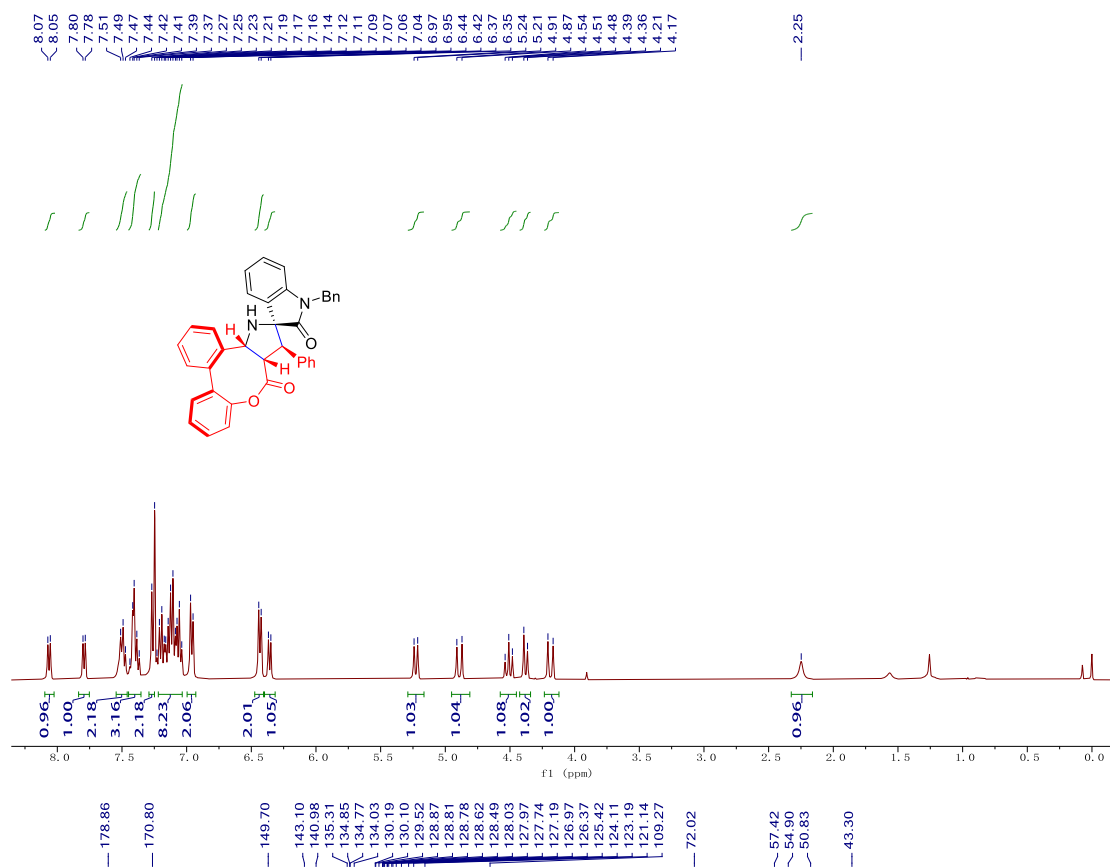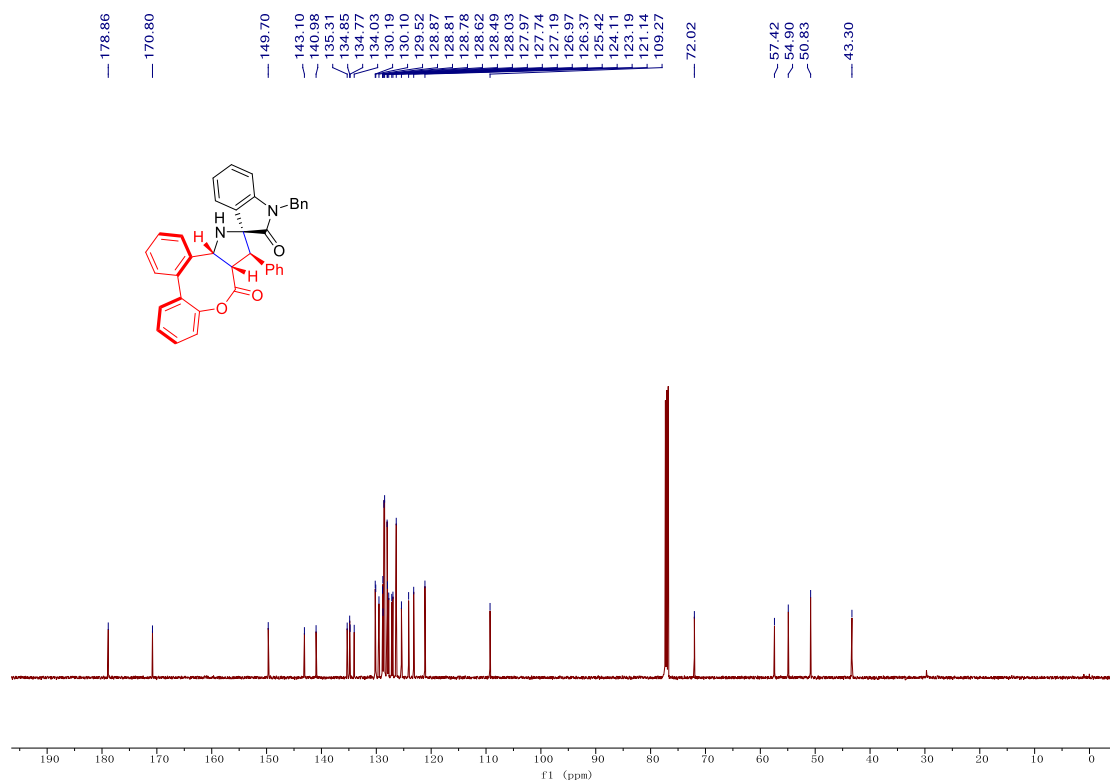

4ab

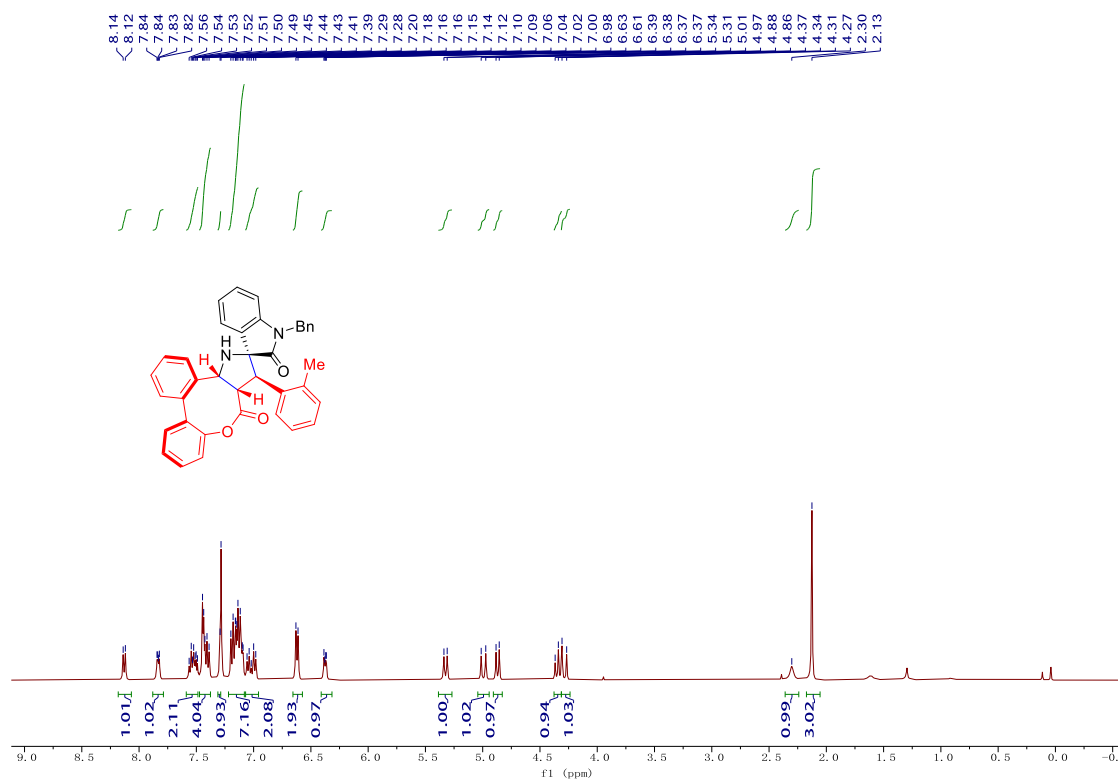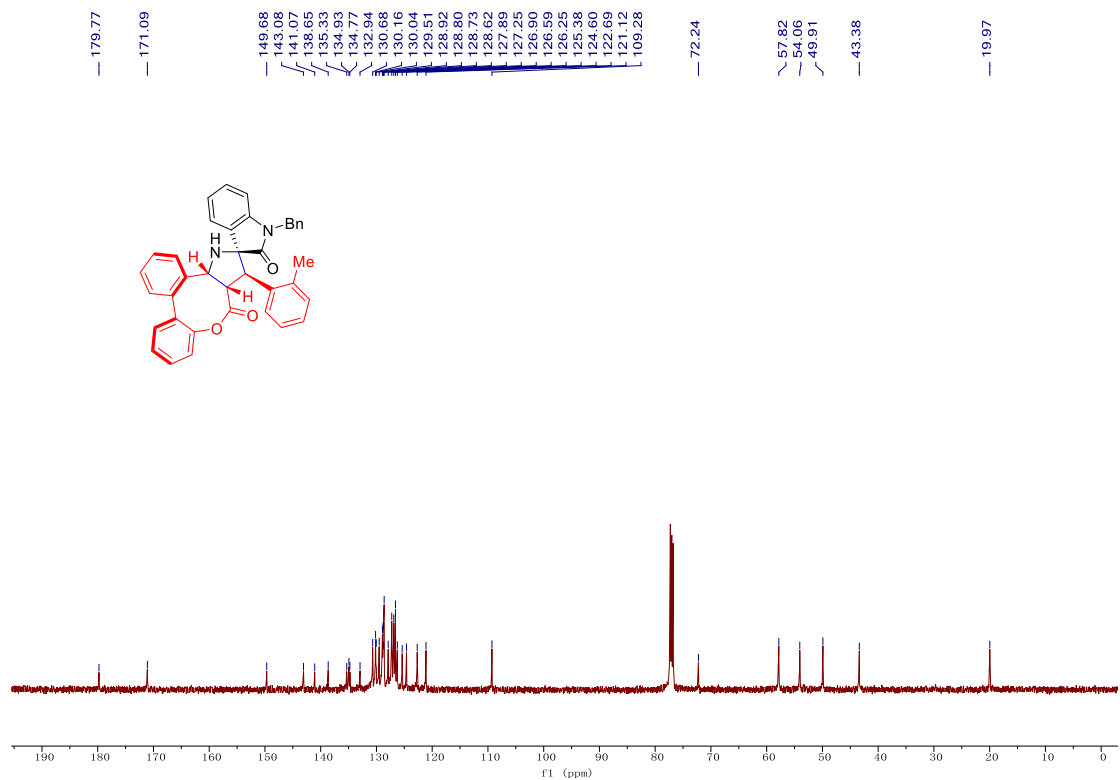



4ac

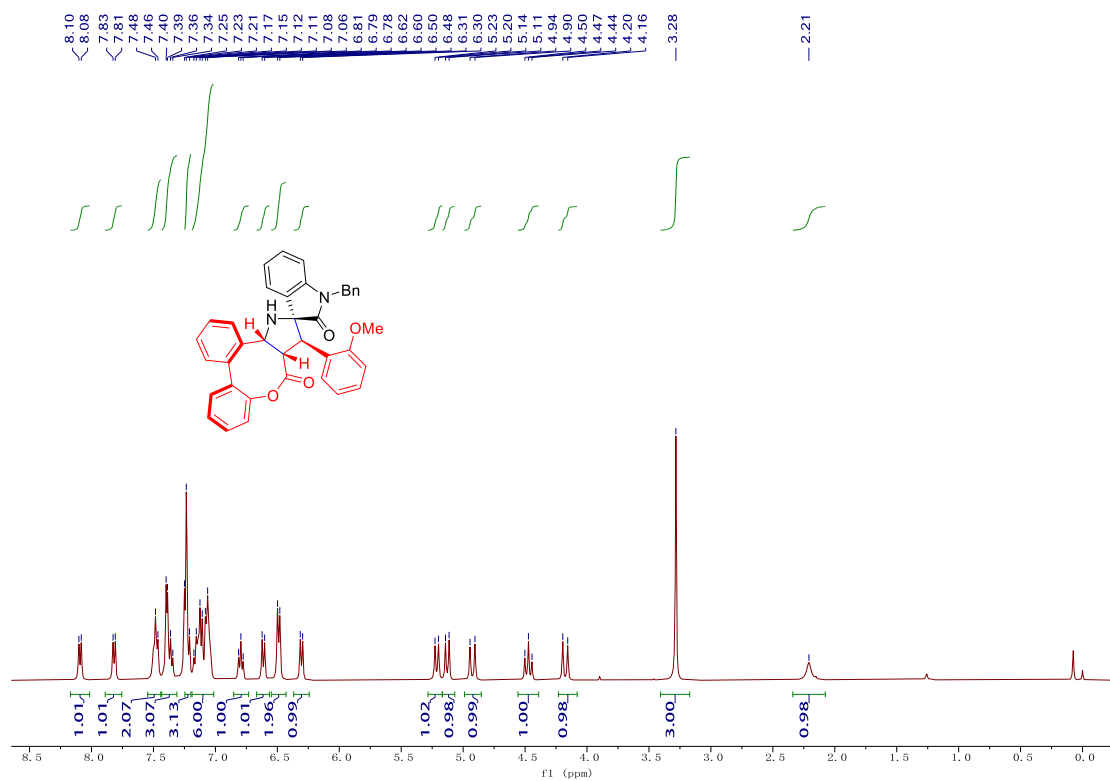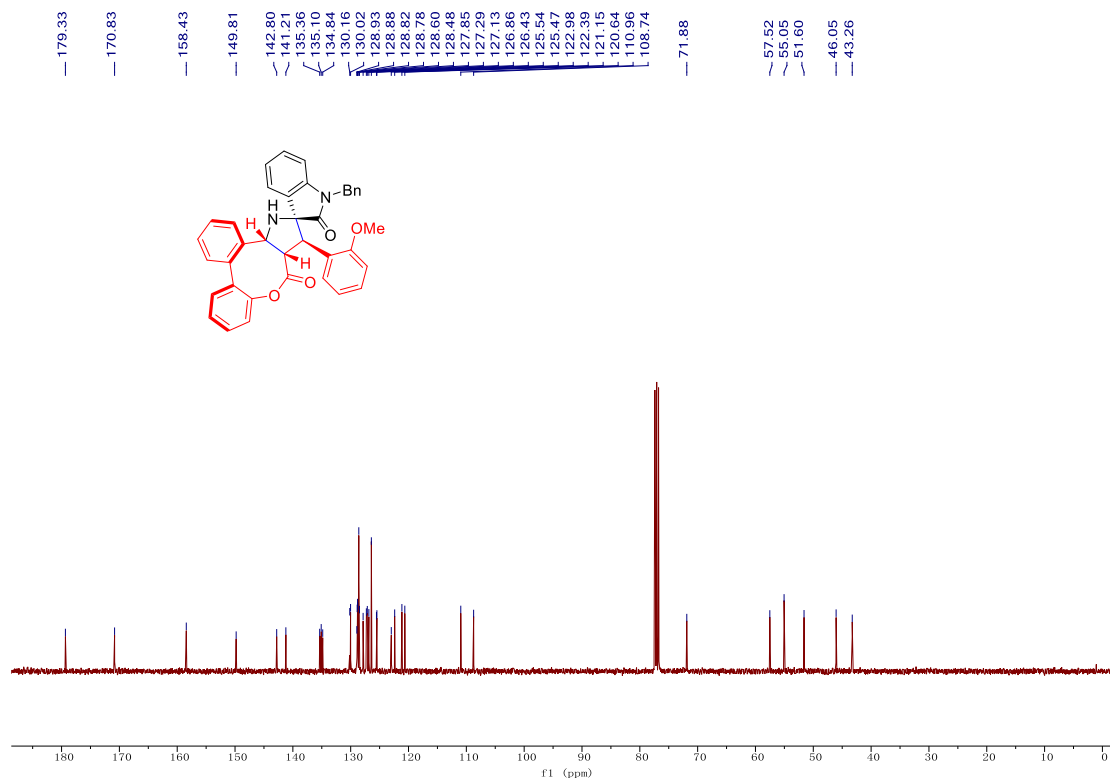

4ad

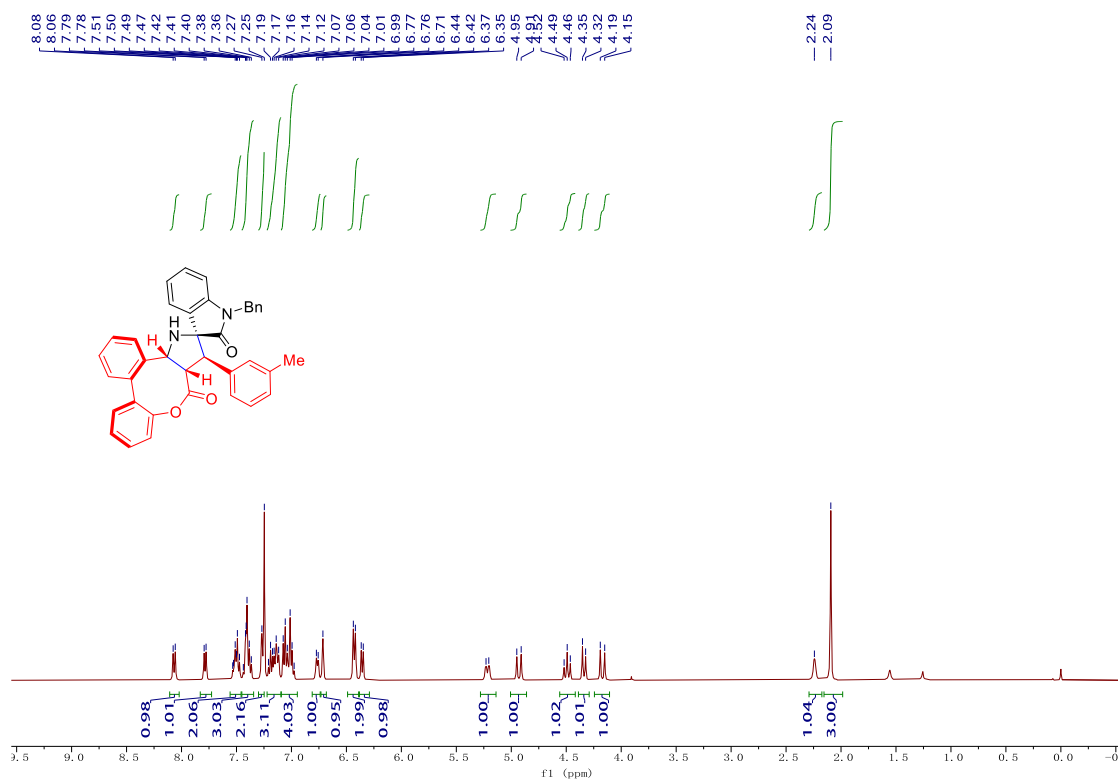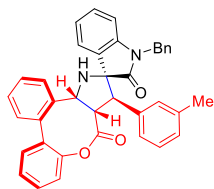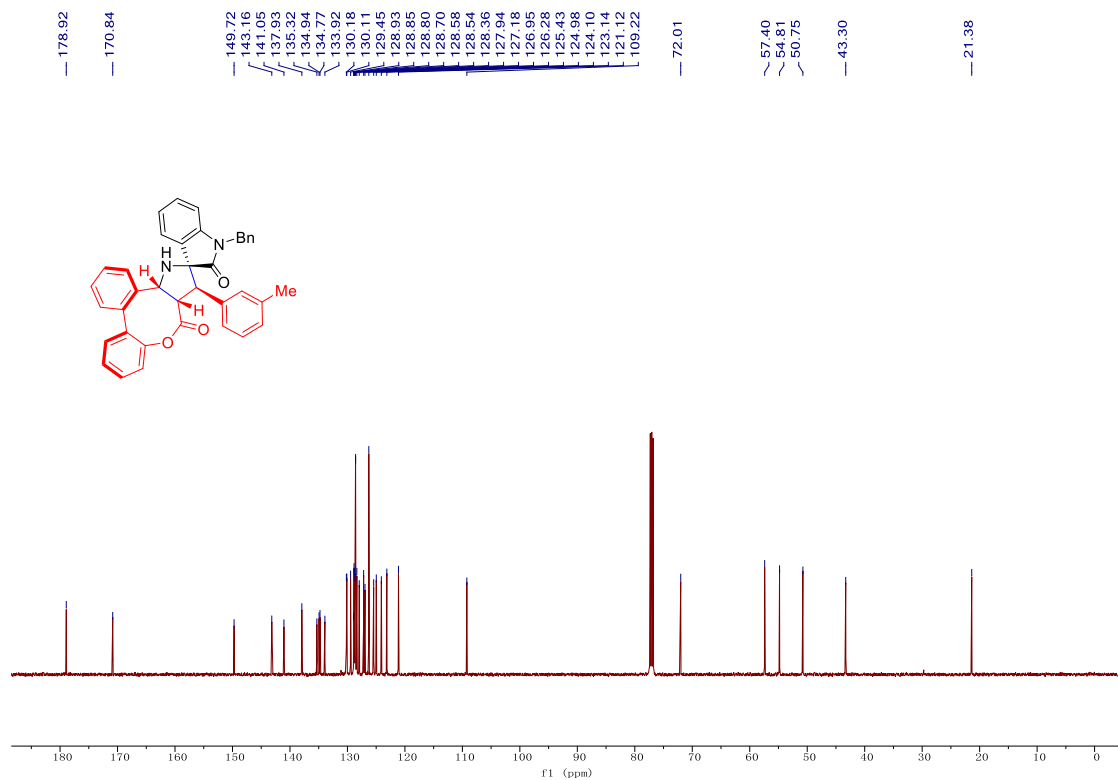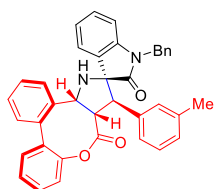

4ae

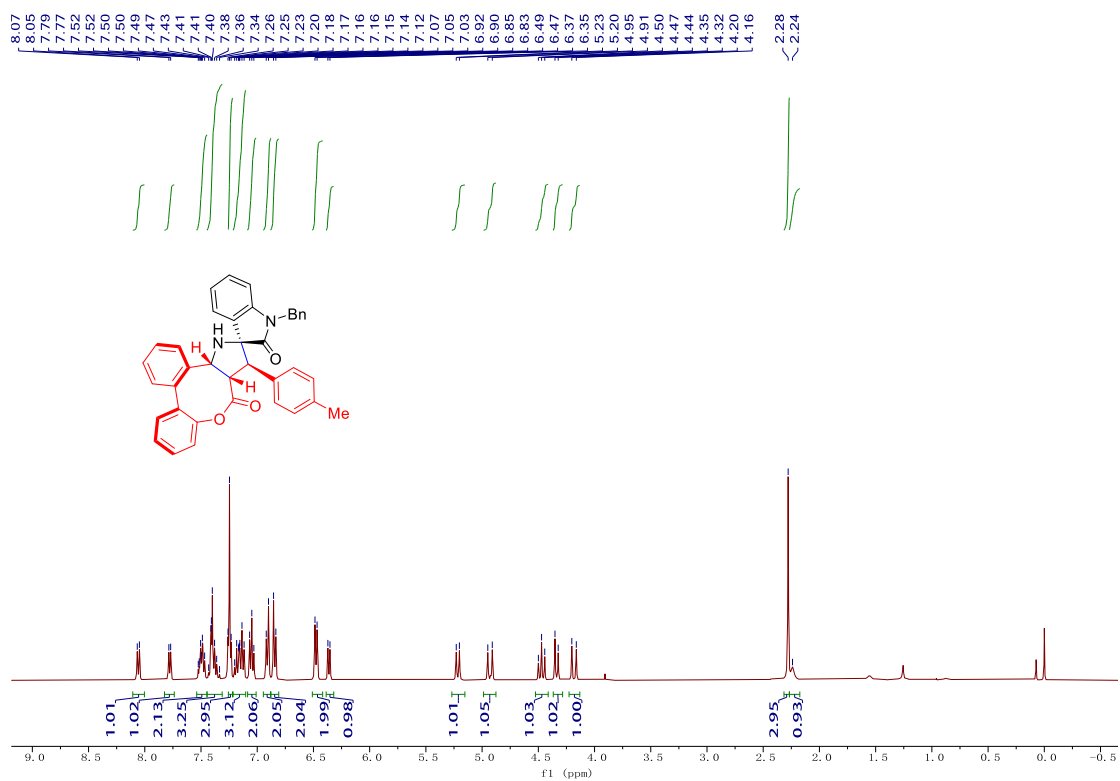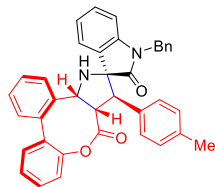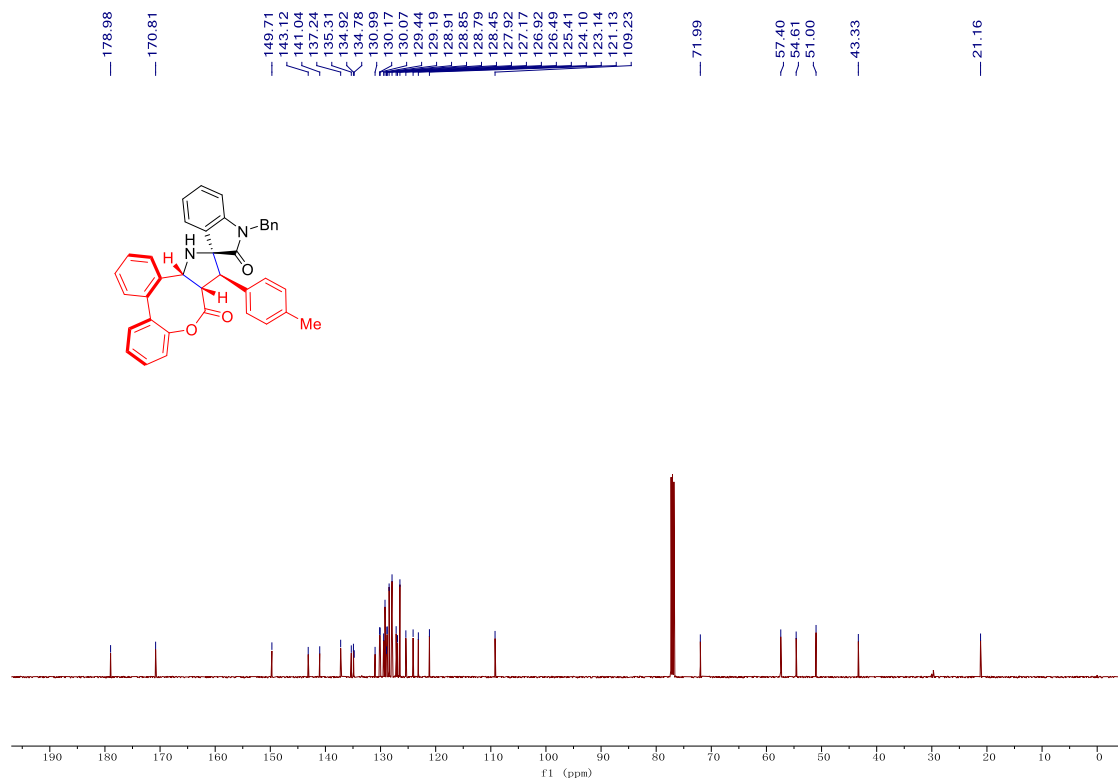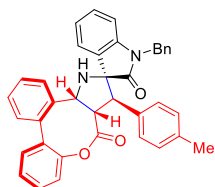

4af

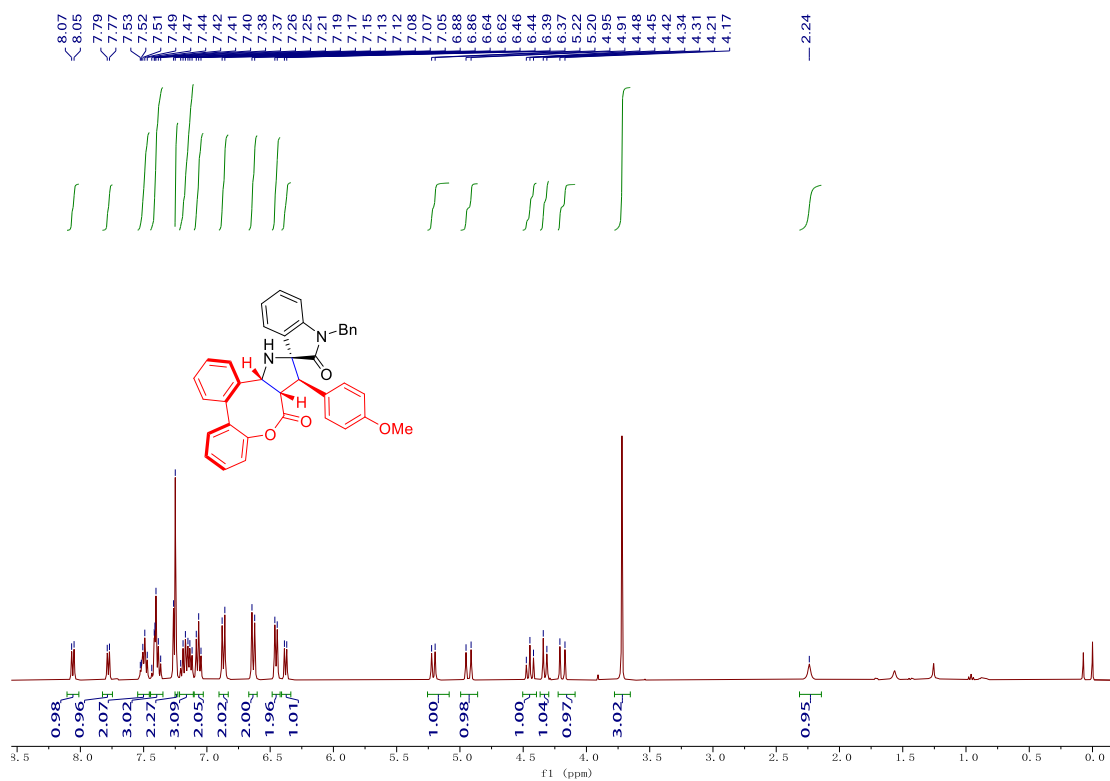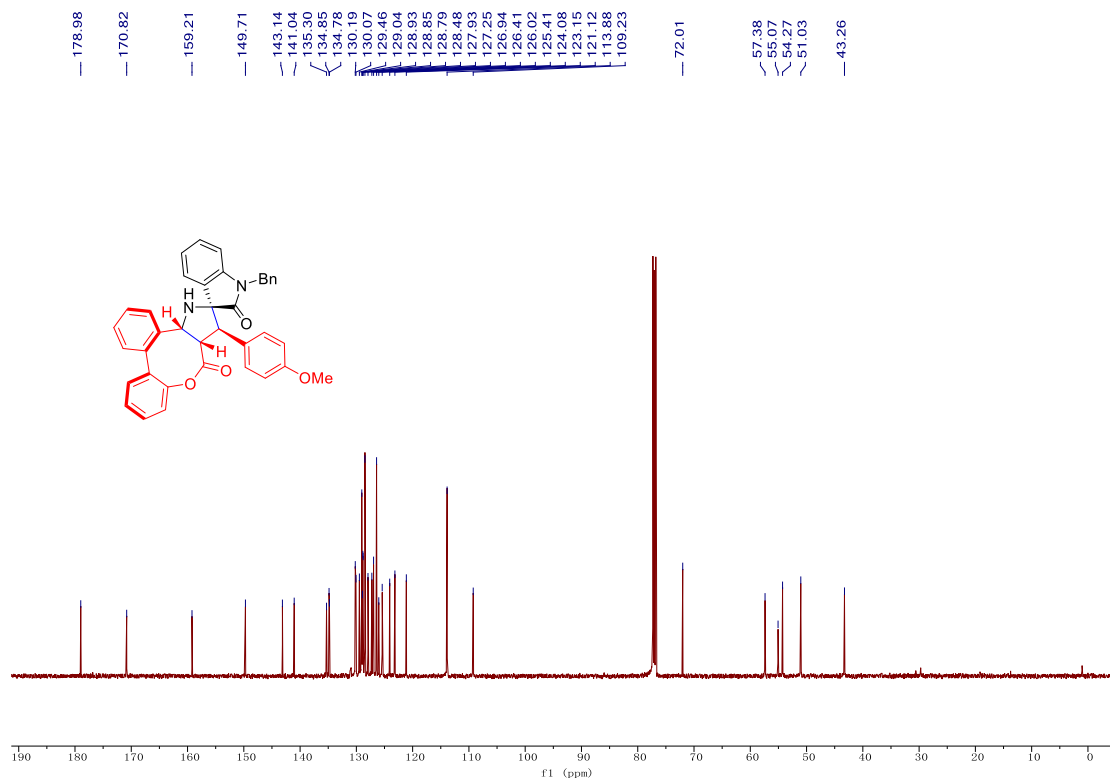

4ag

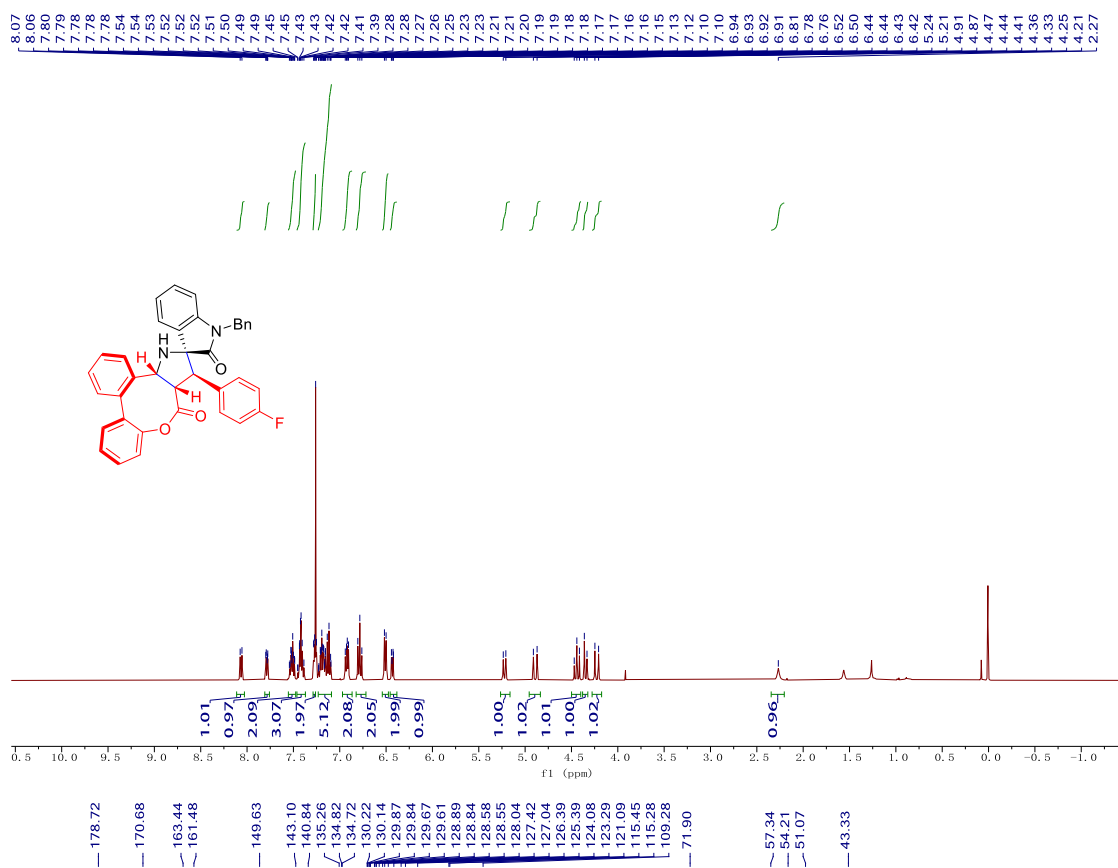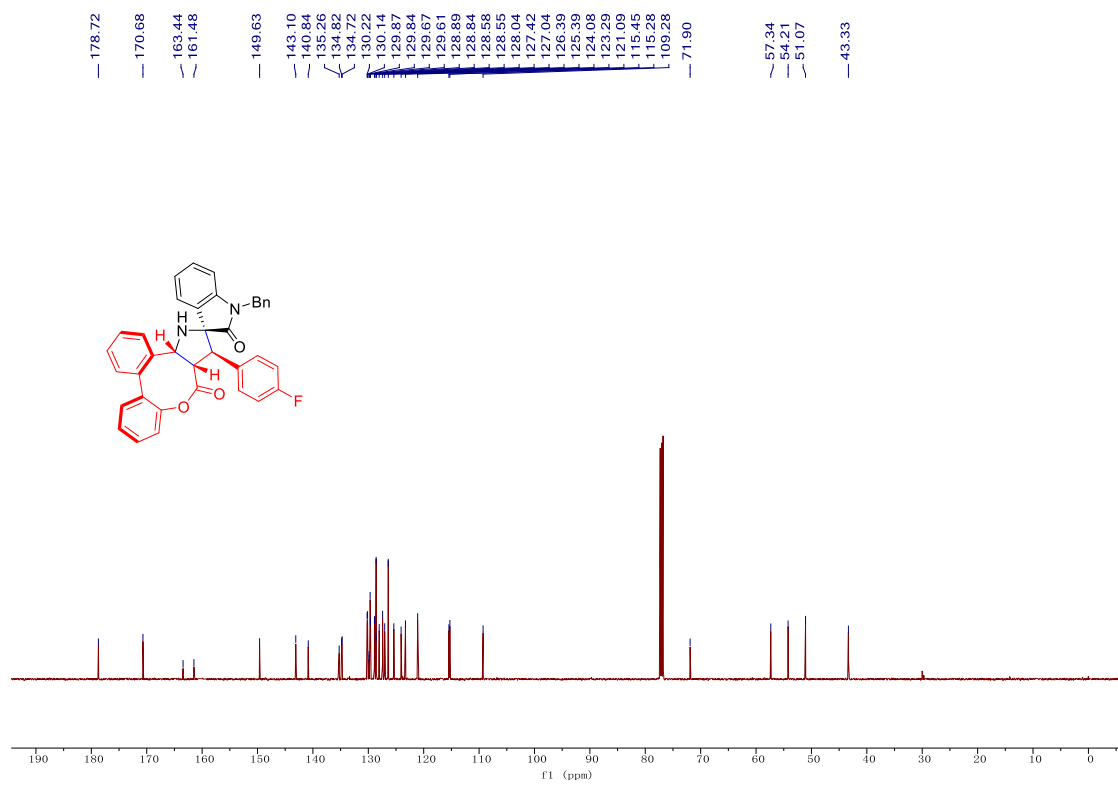

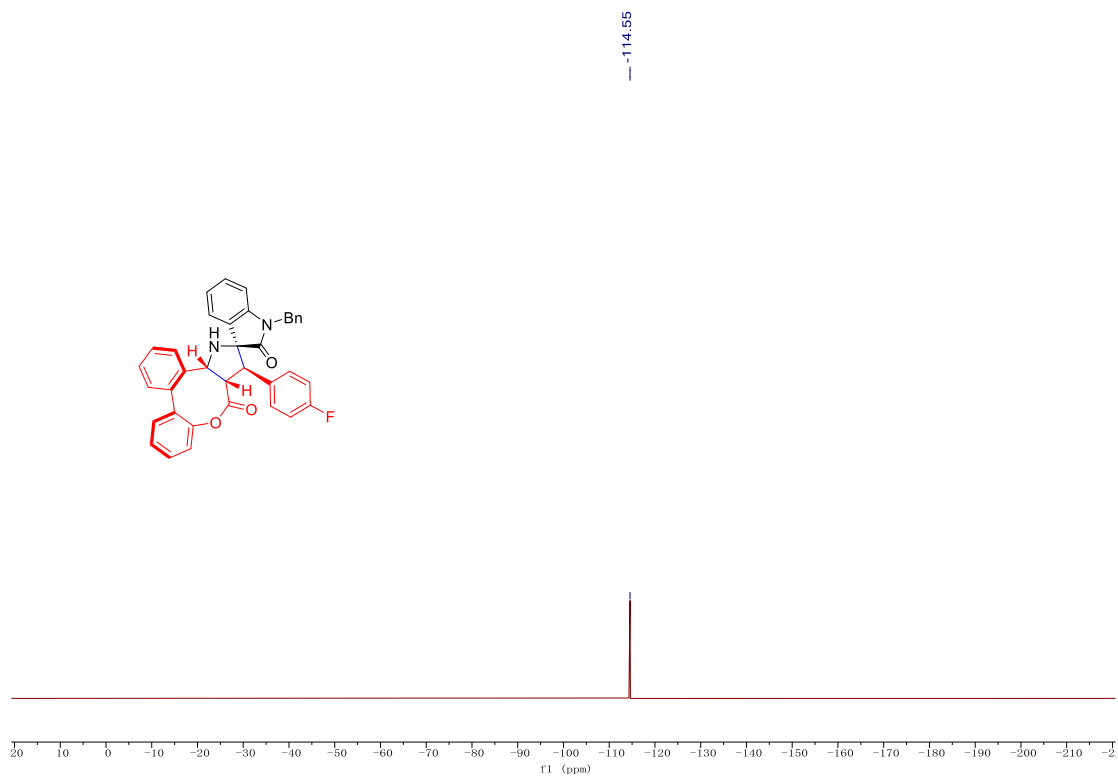

4ah

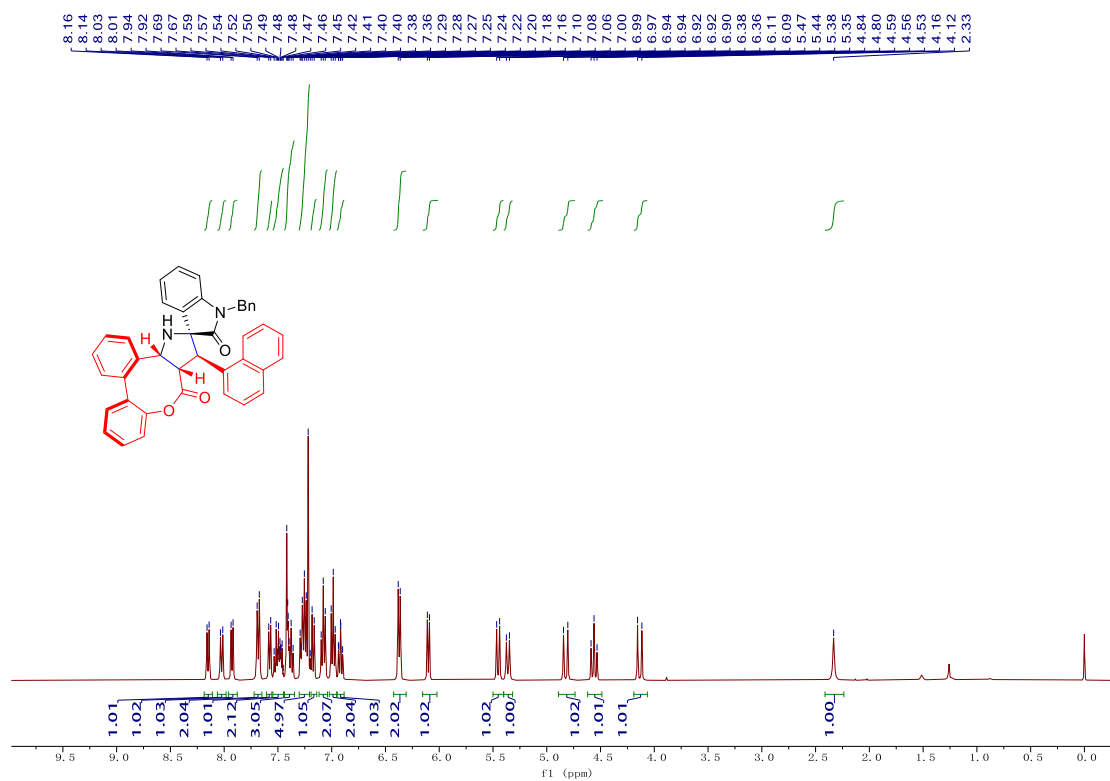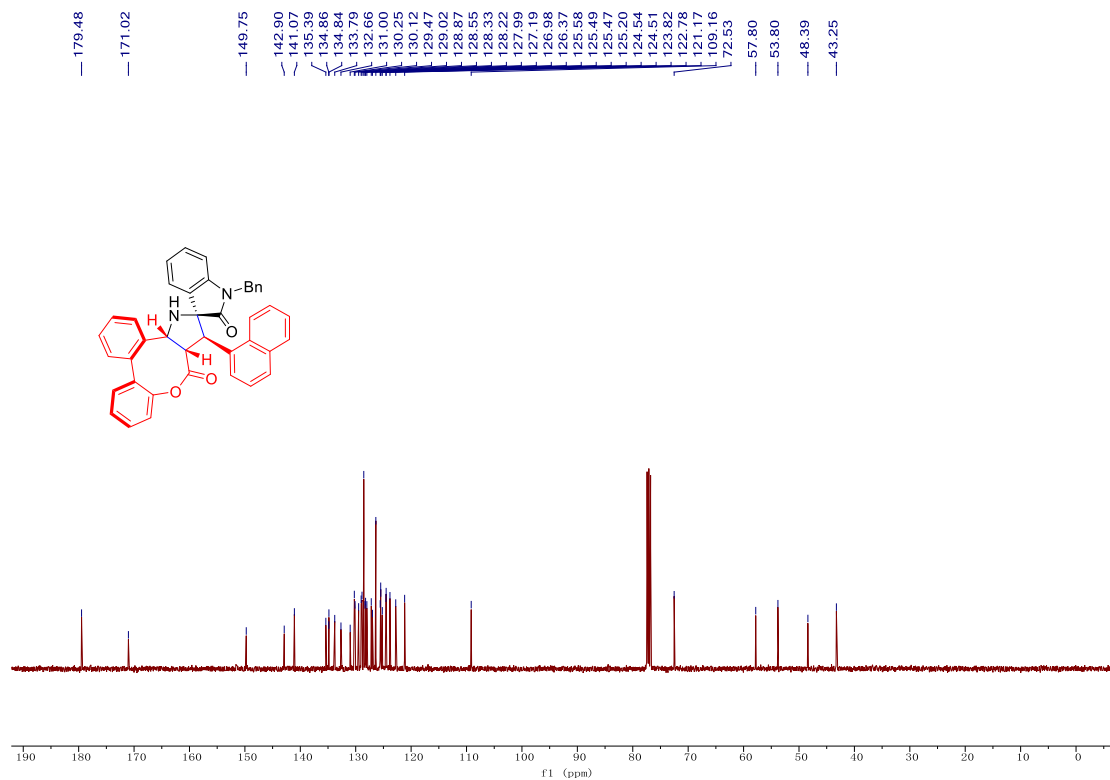

4ai

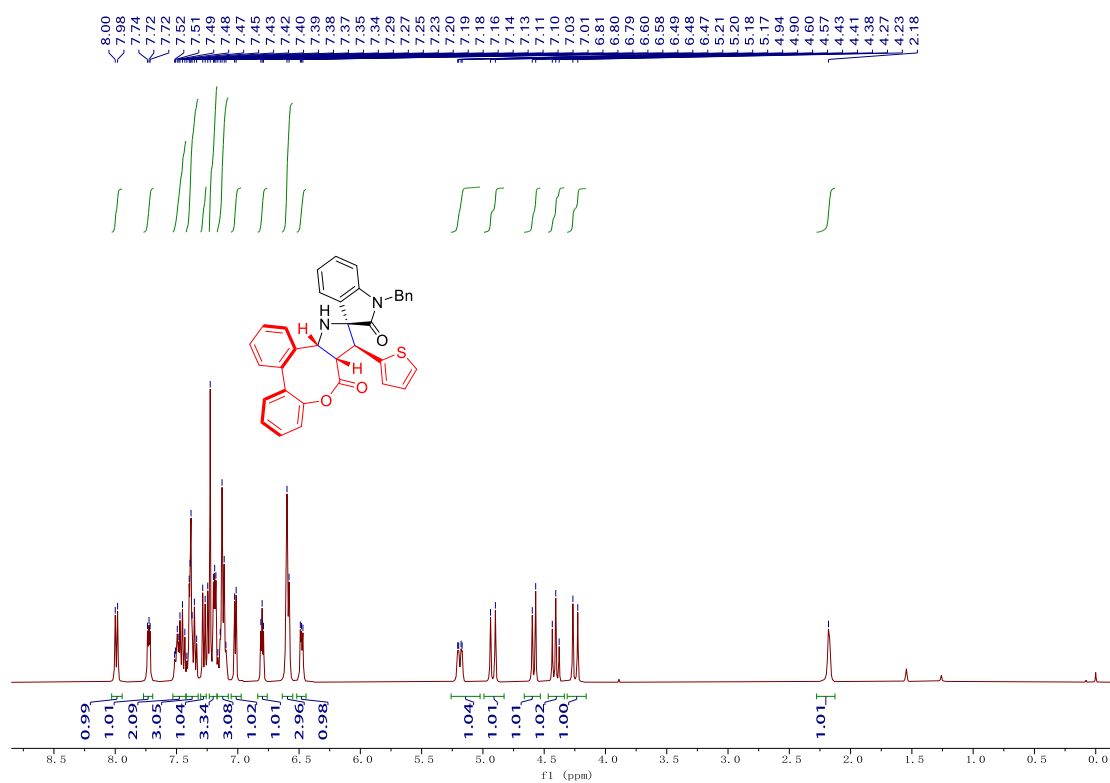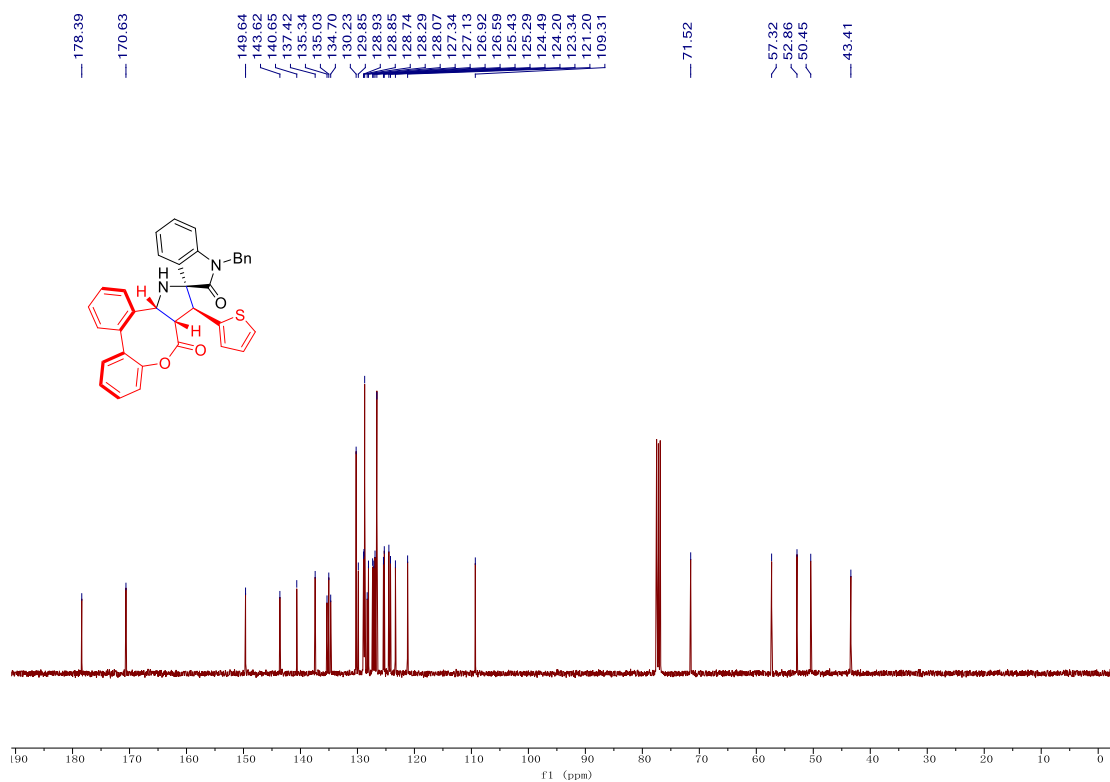



4aj

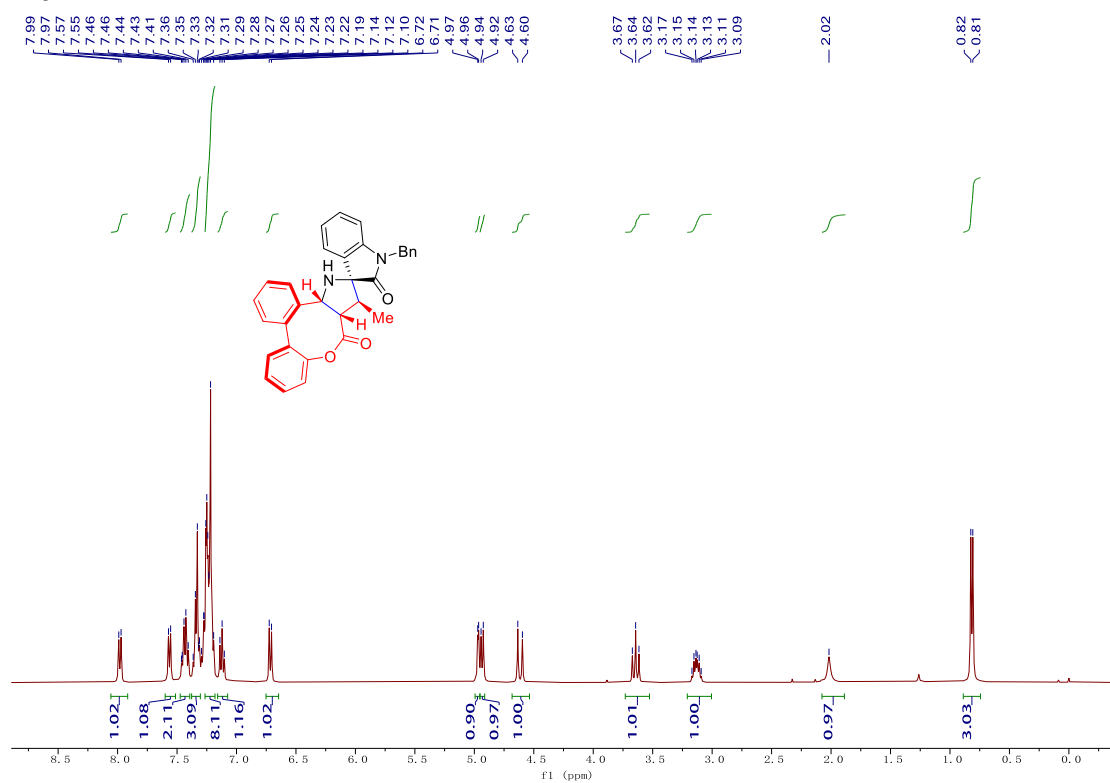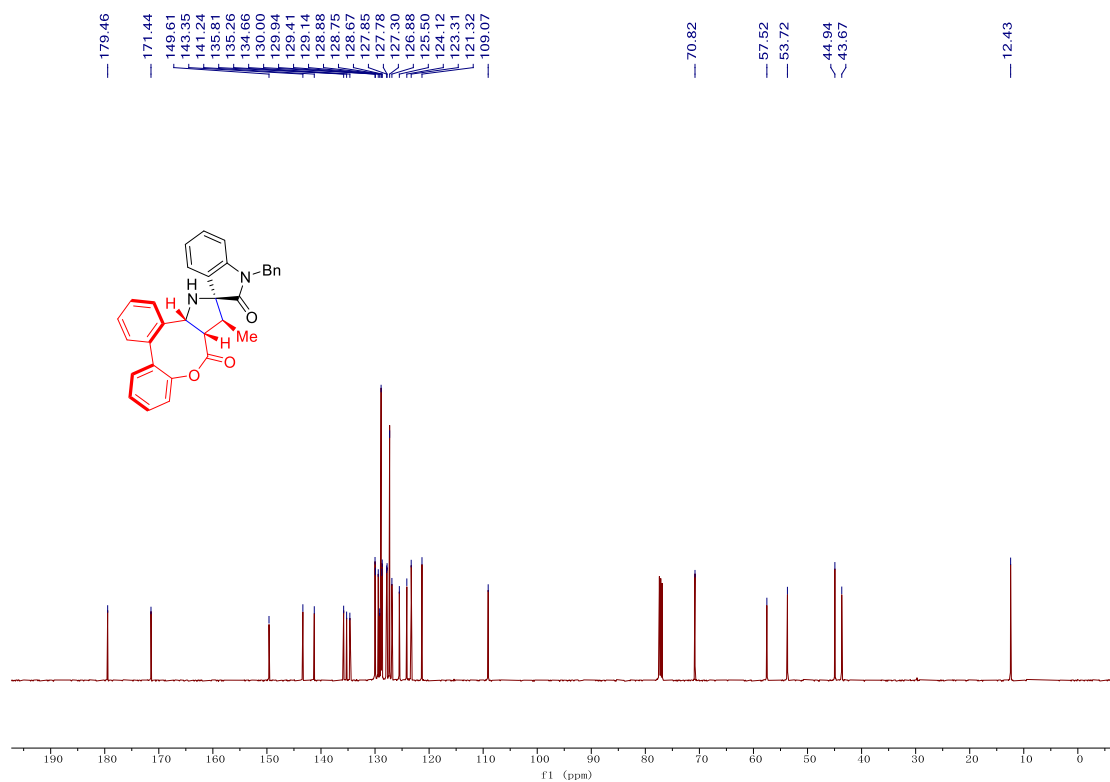

4ak

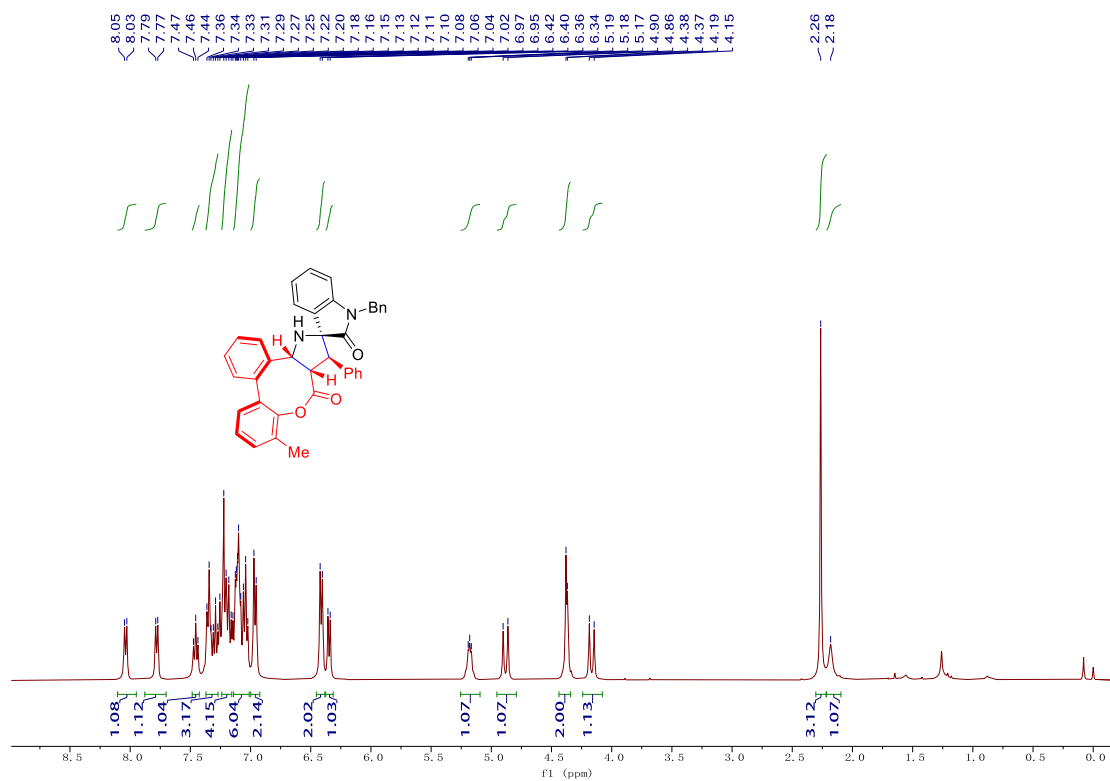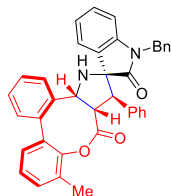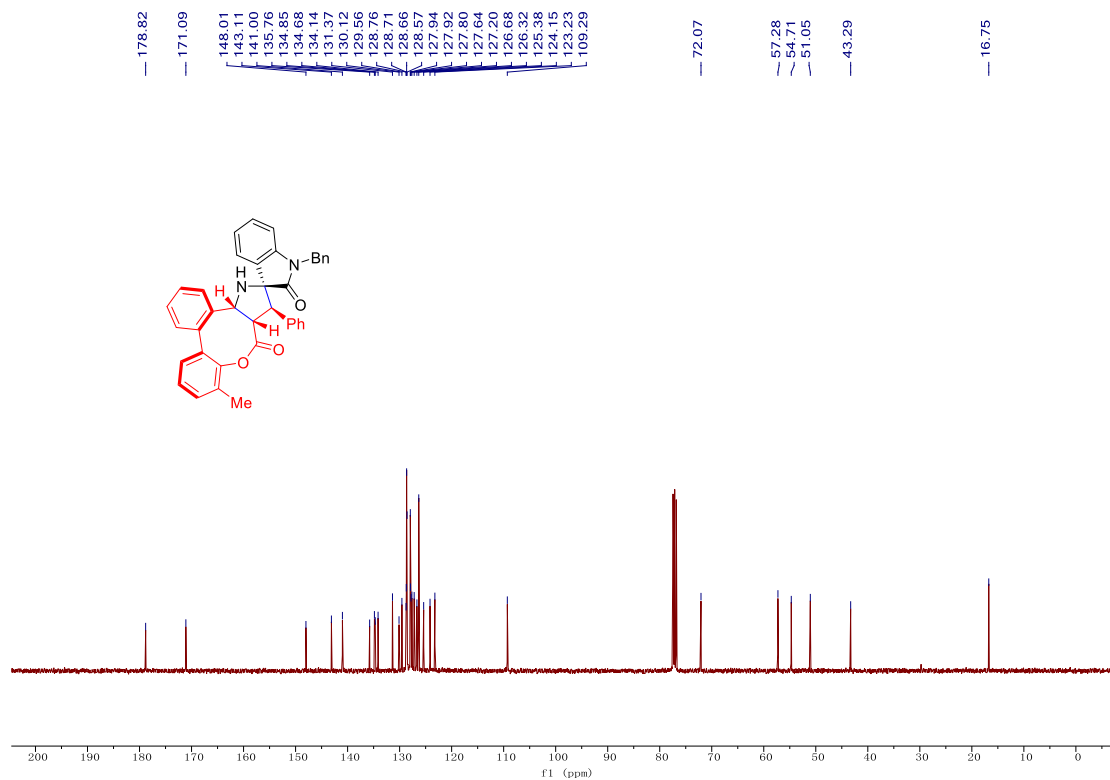

4al

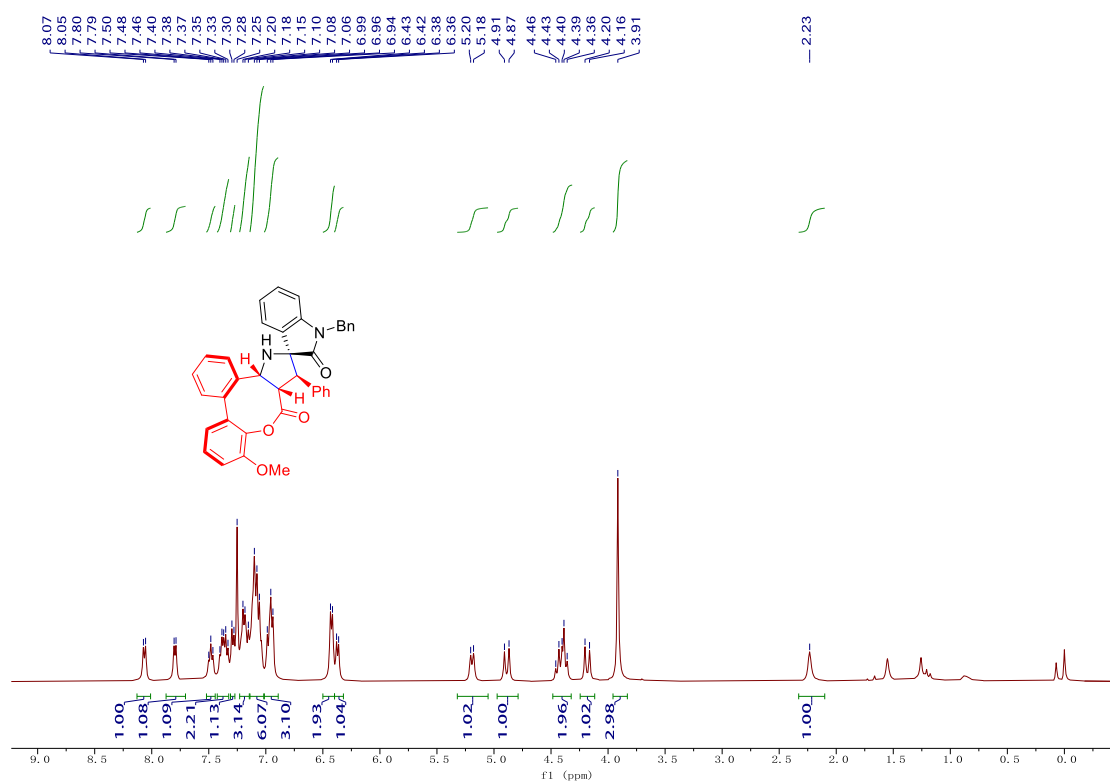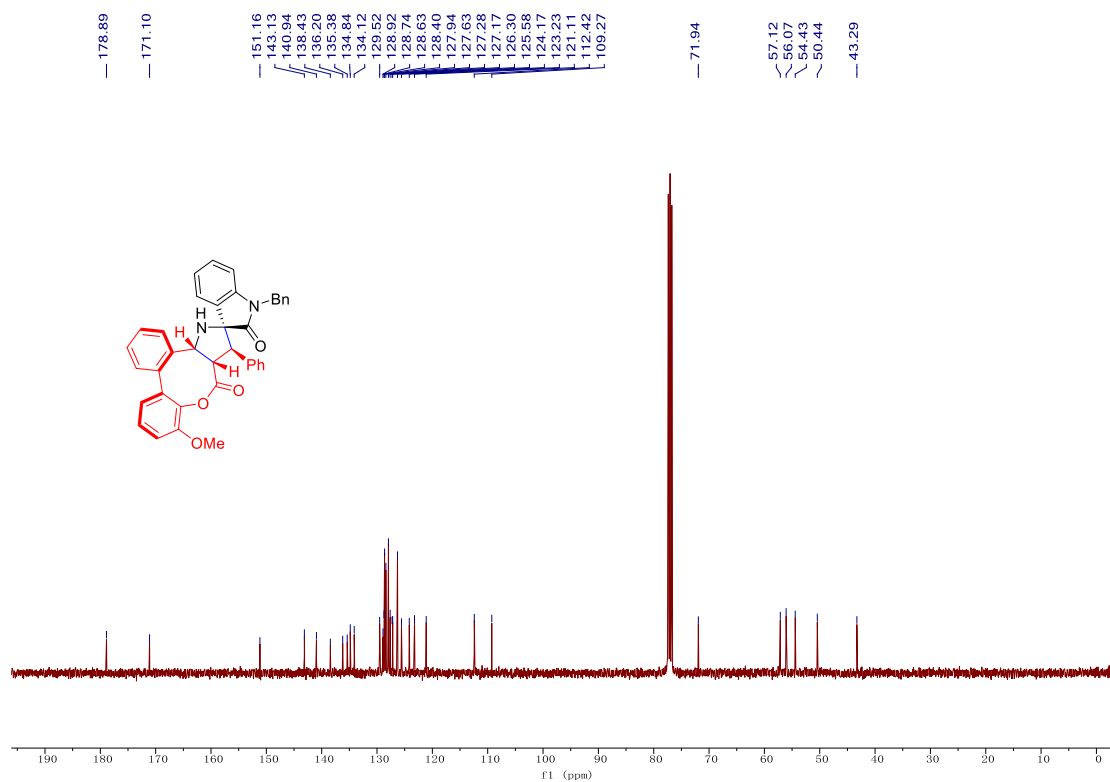

4am

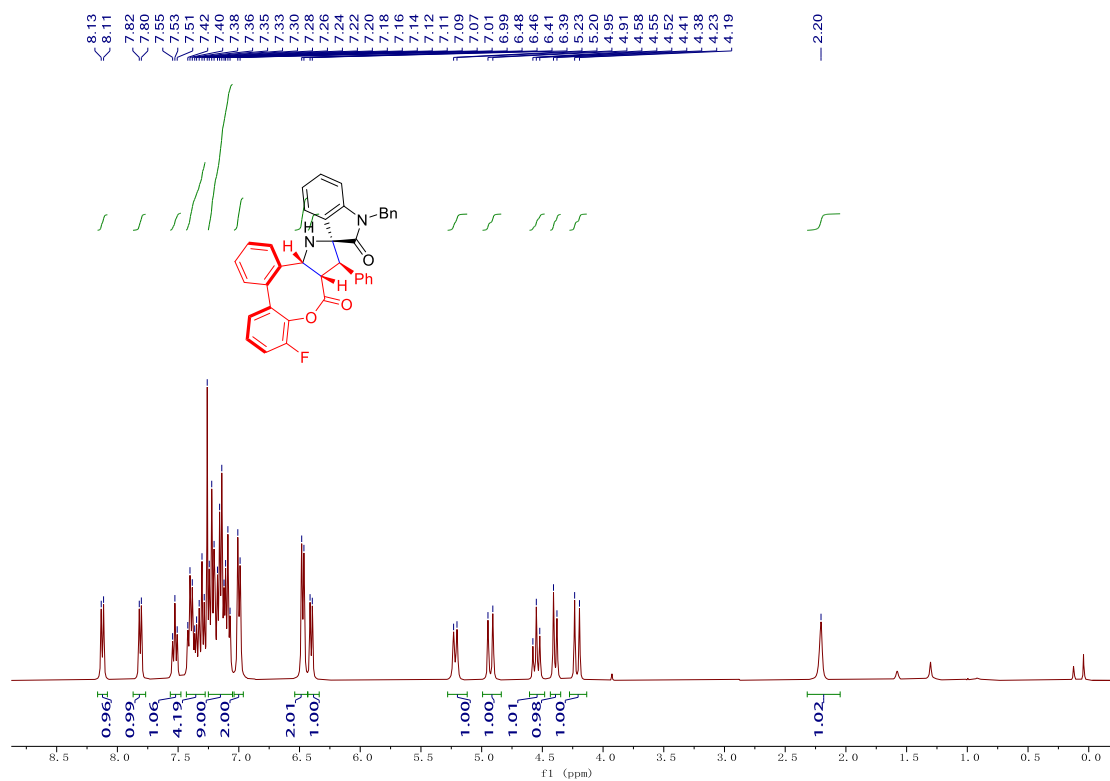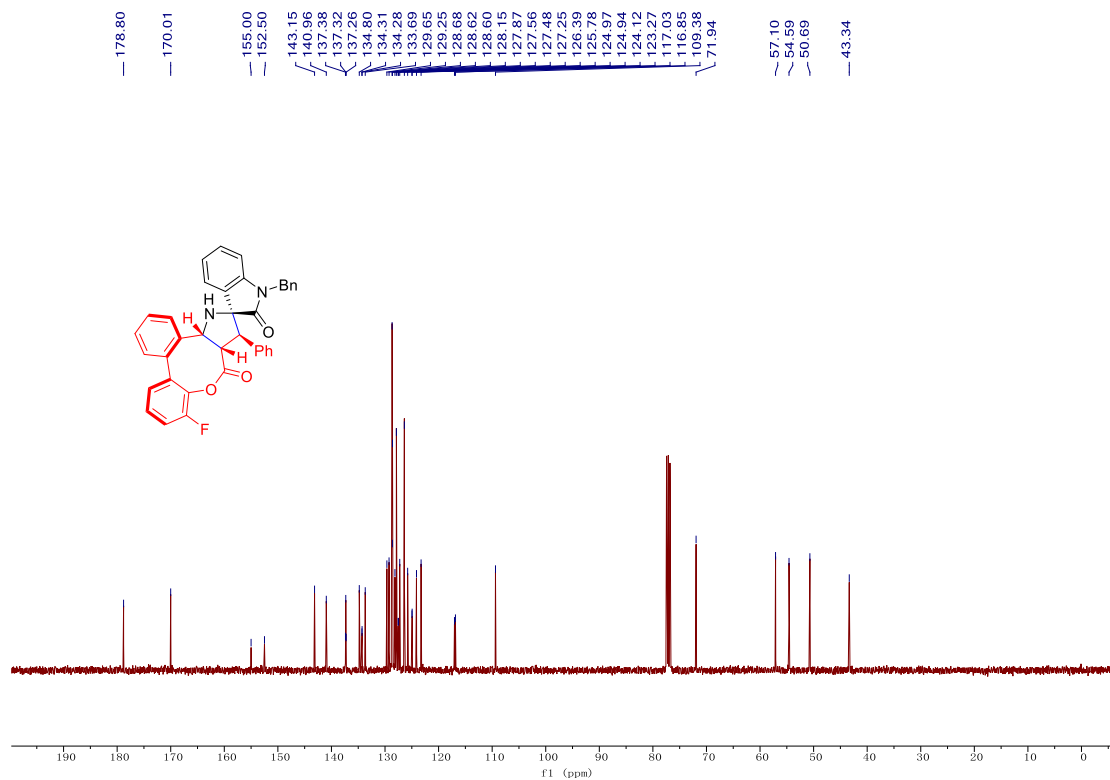

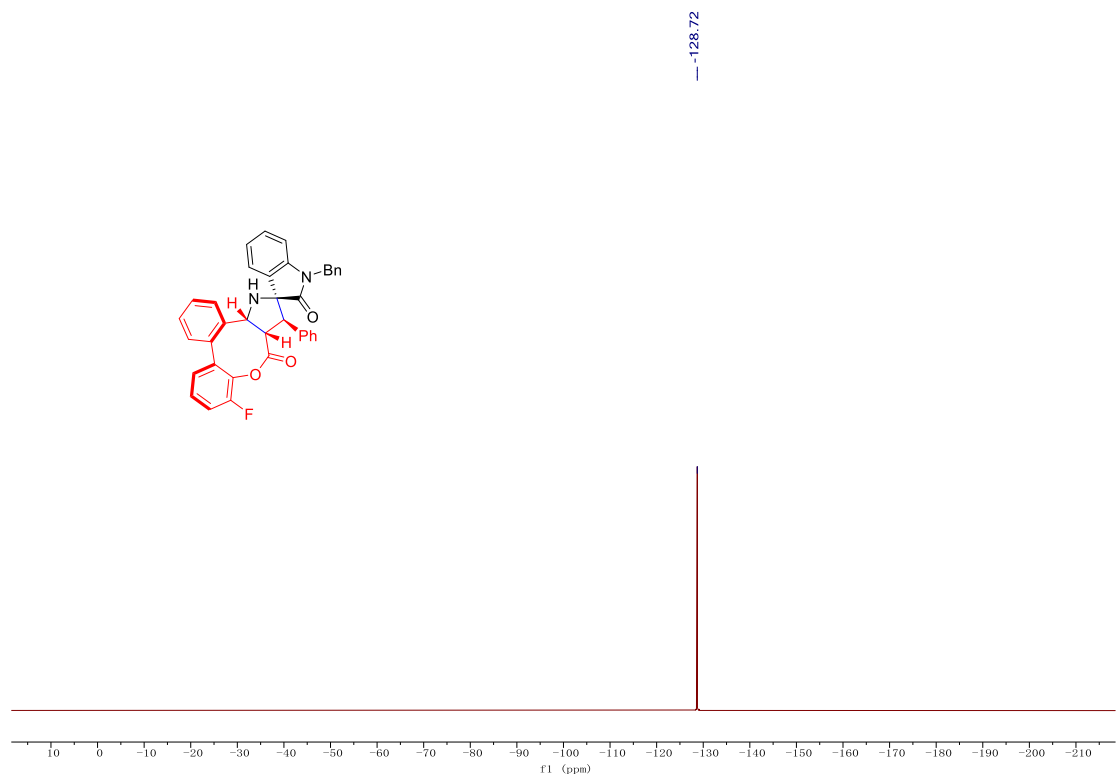

4an

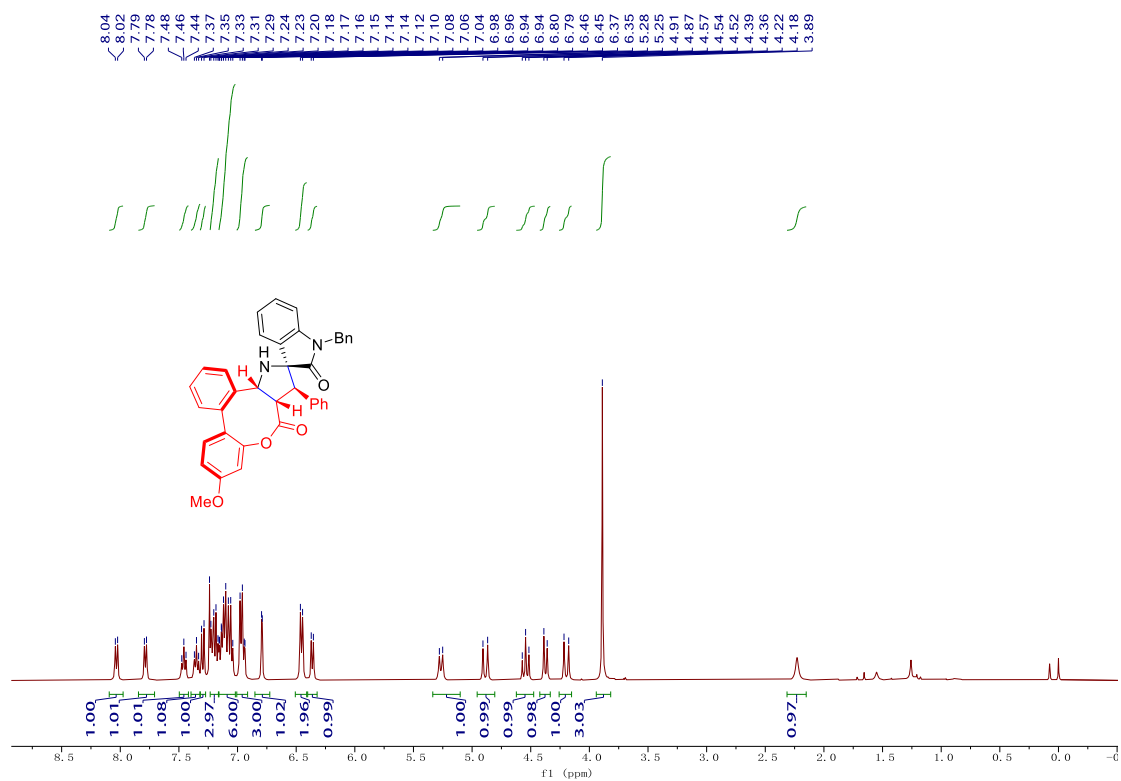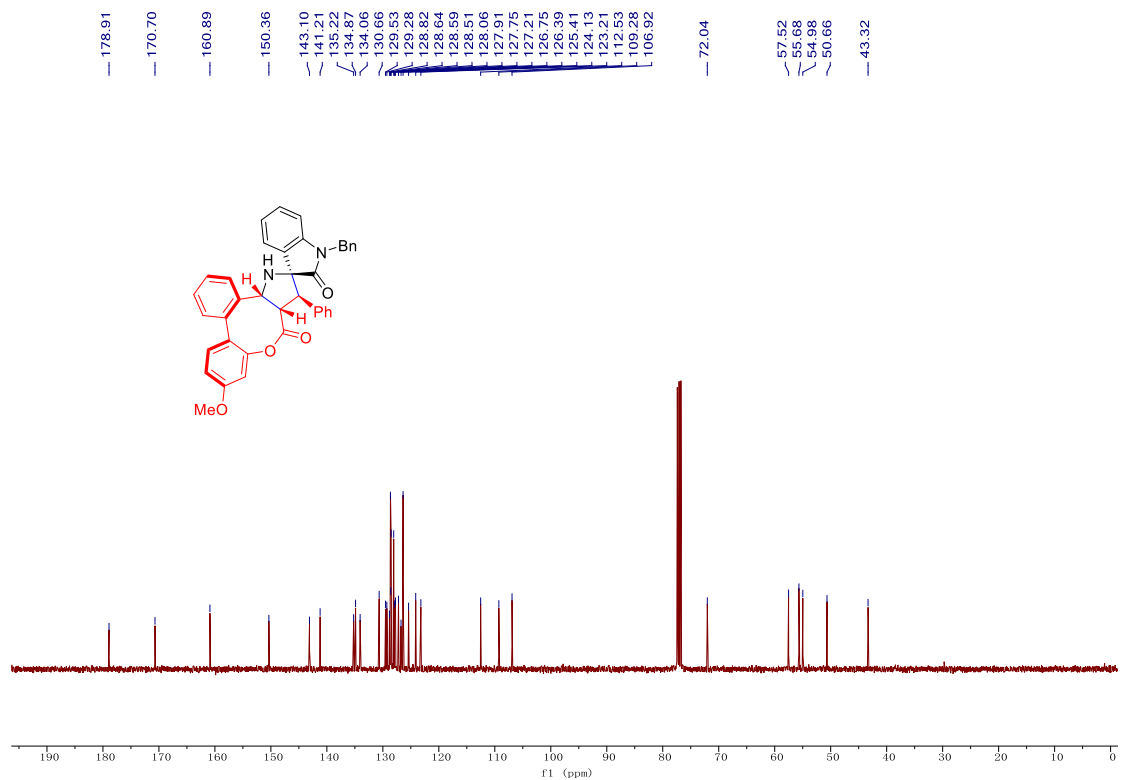

4ao

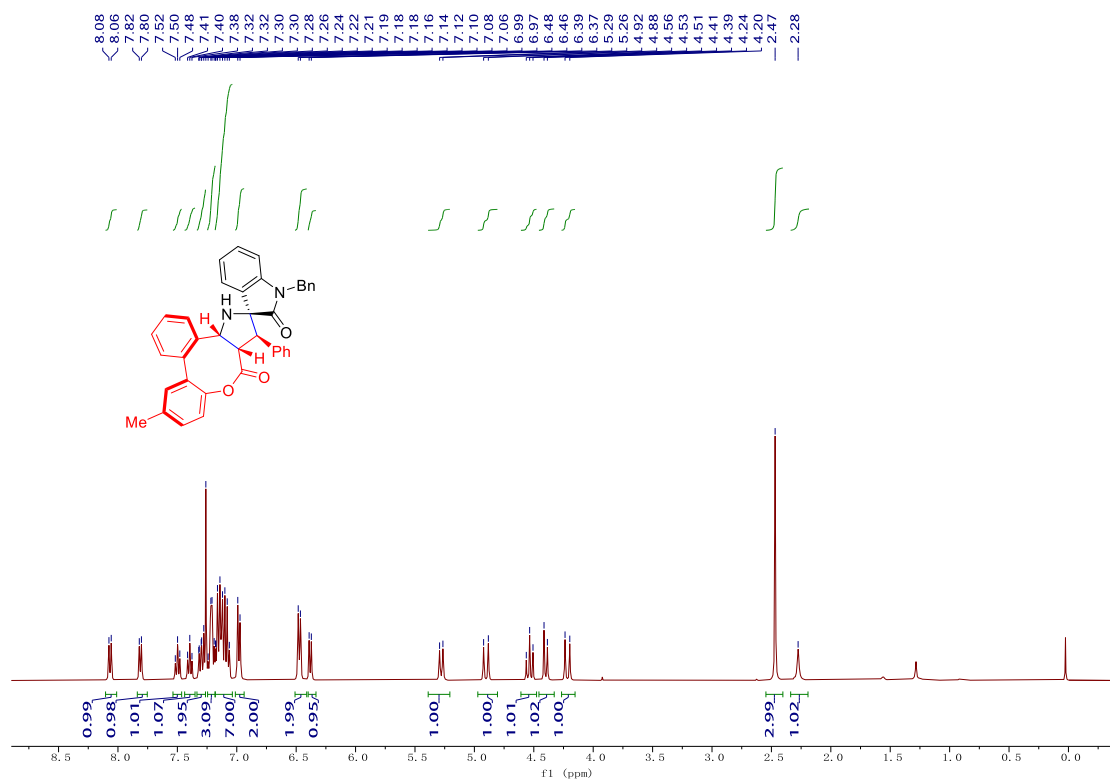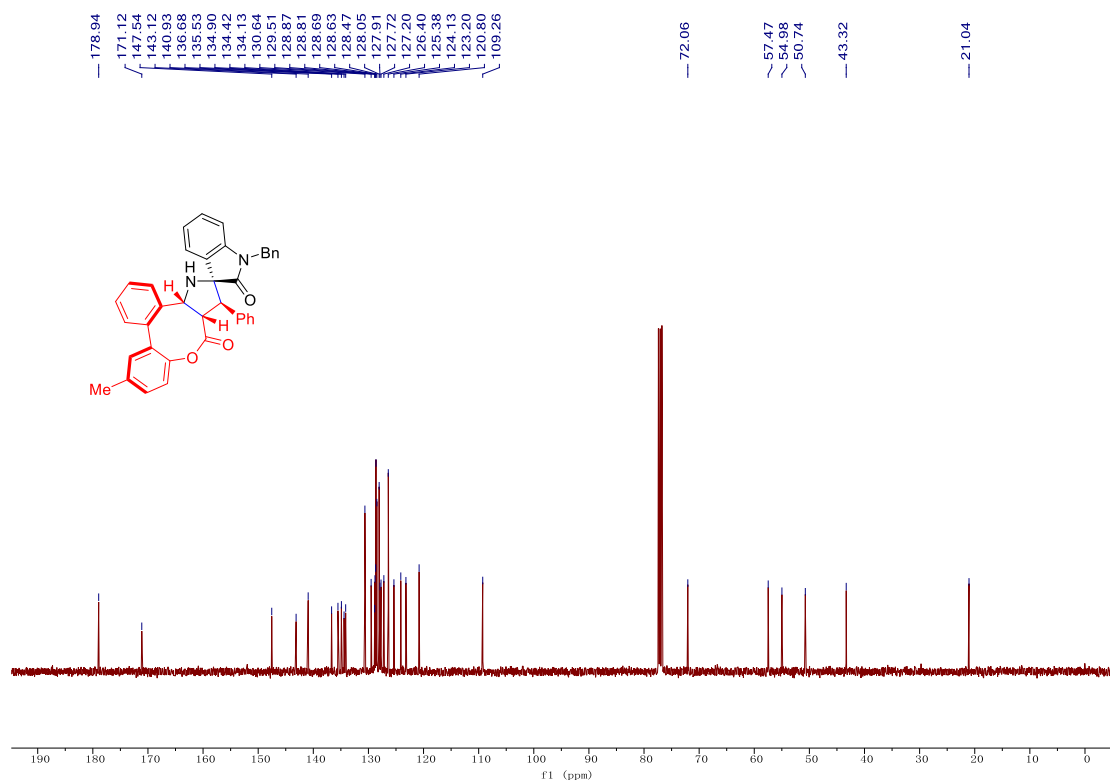

4ap

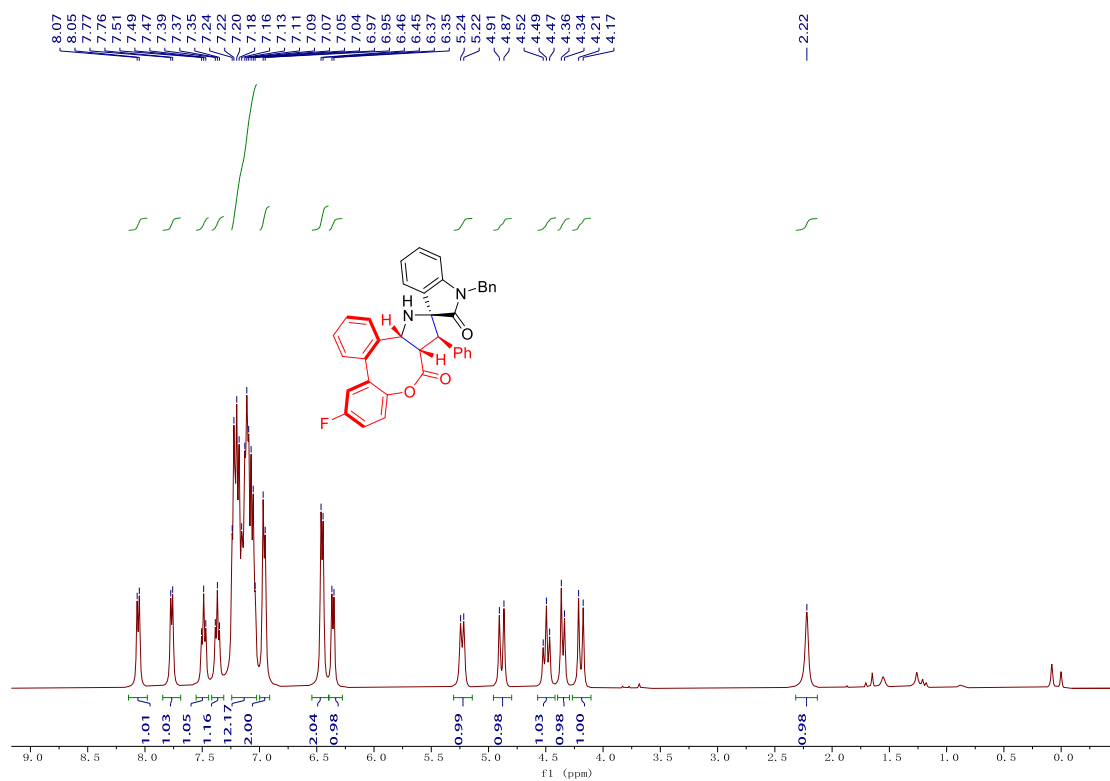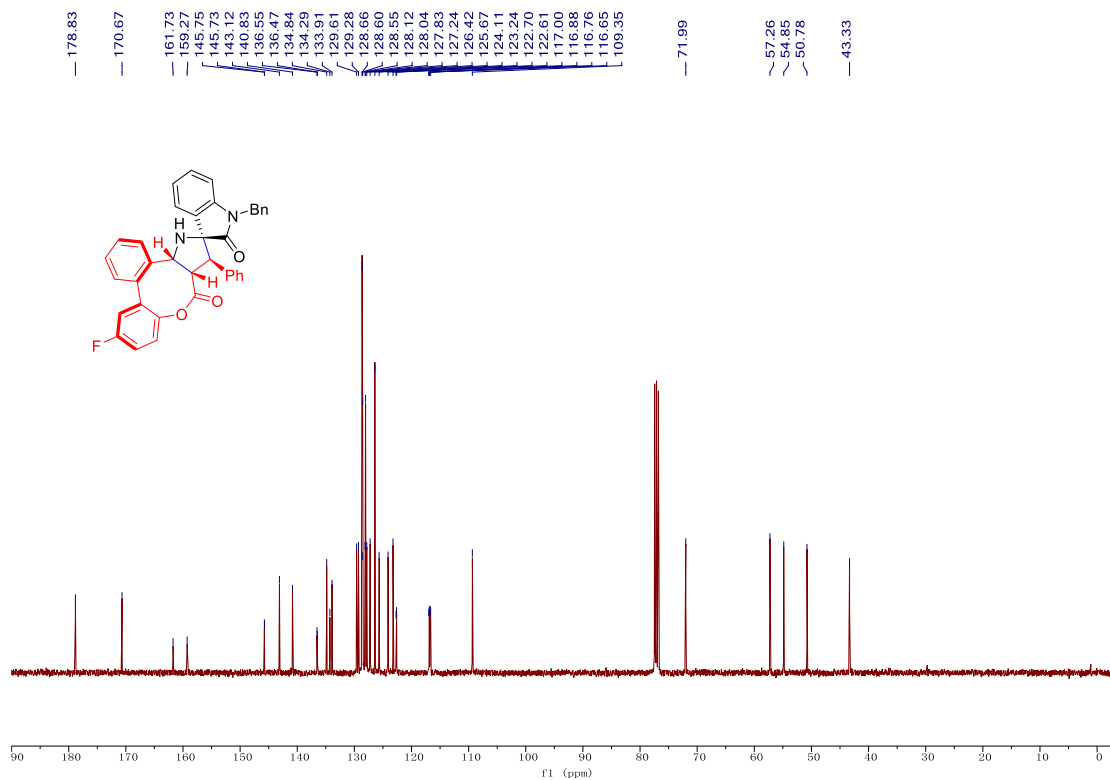



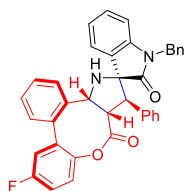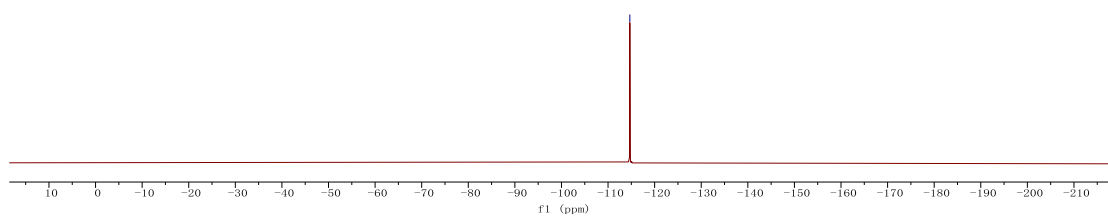

4aq

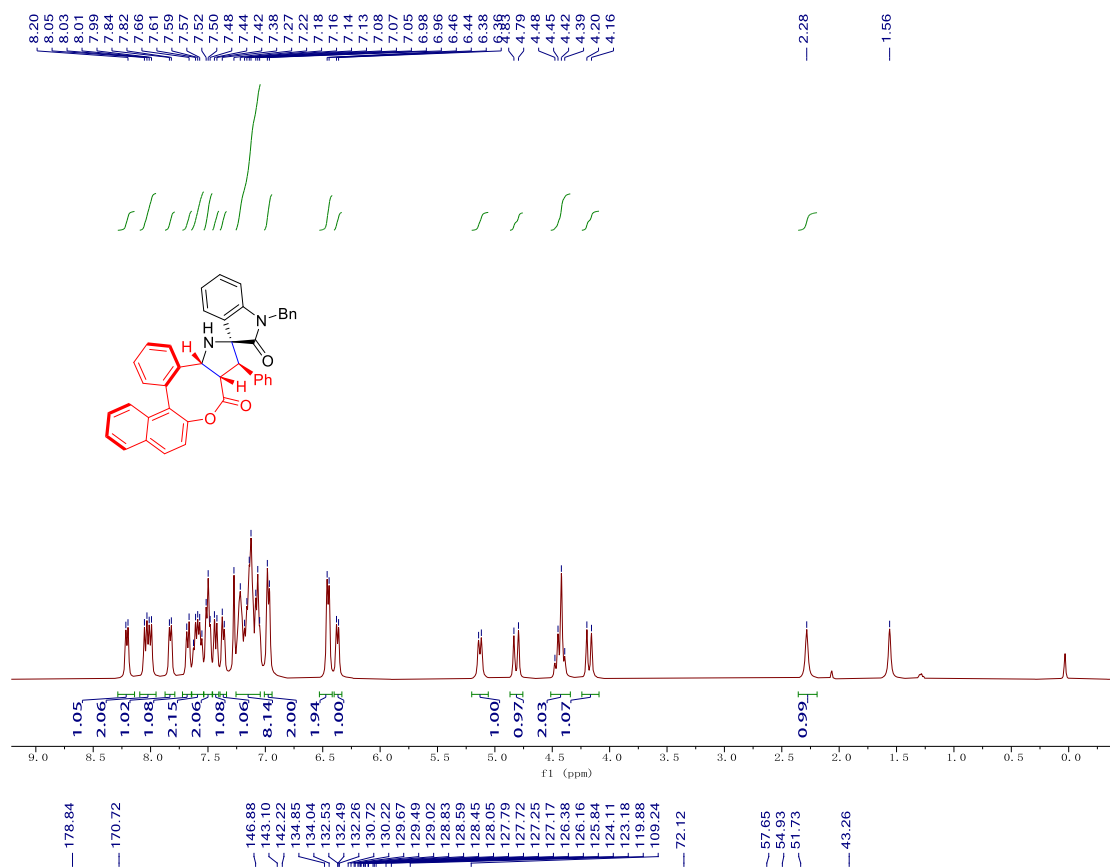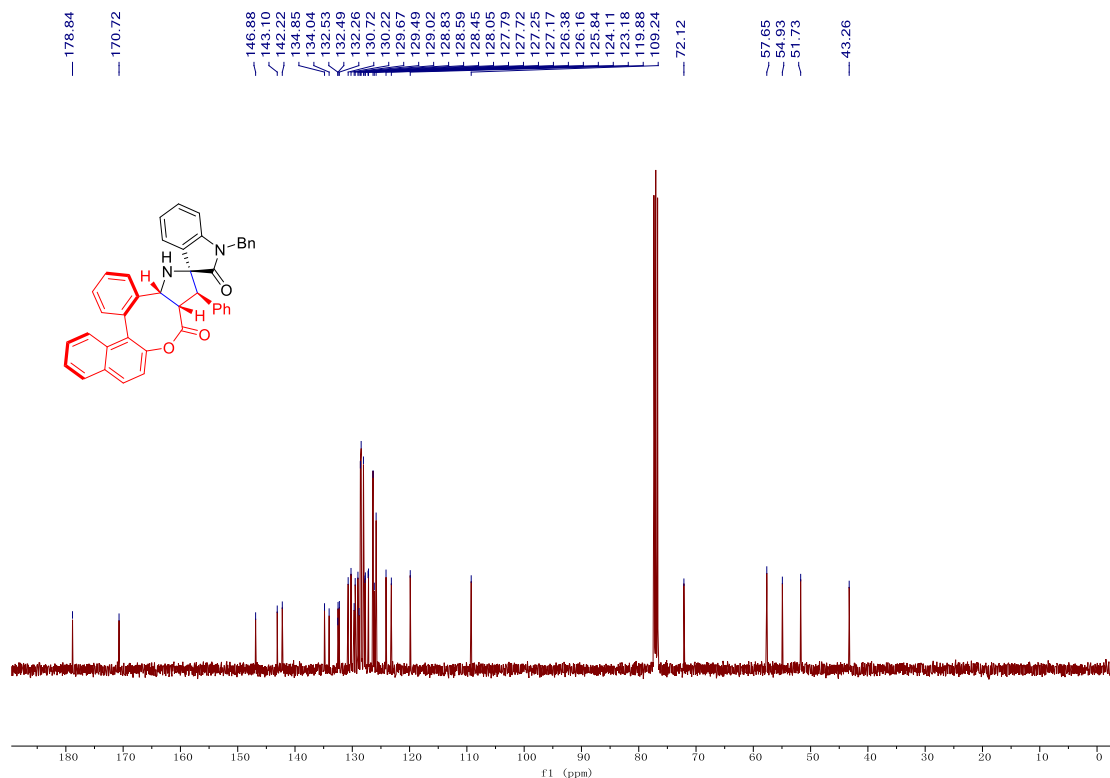

# 4ar

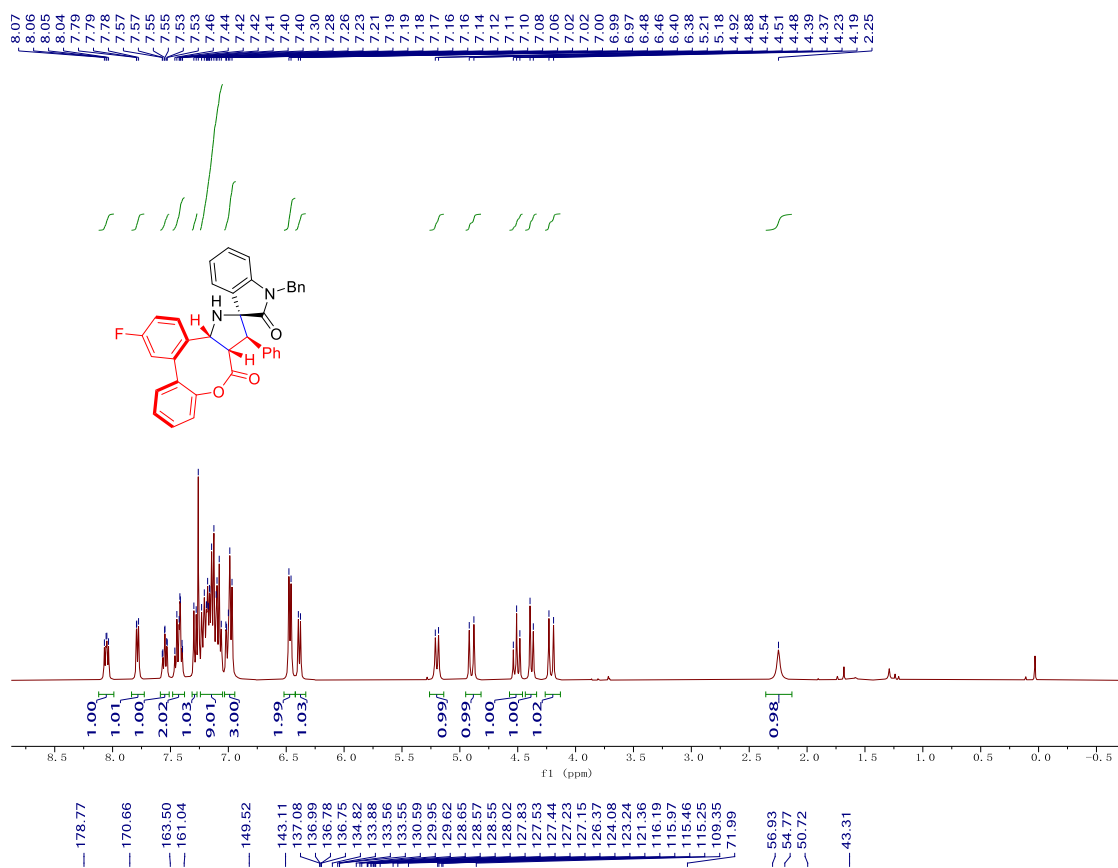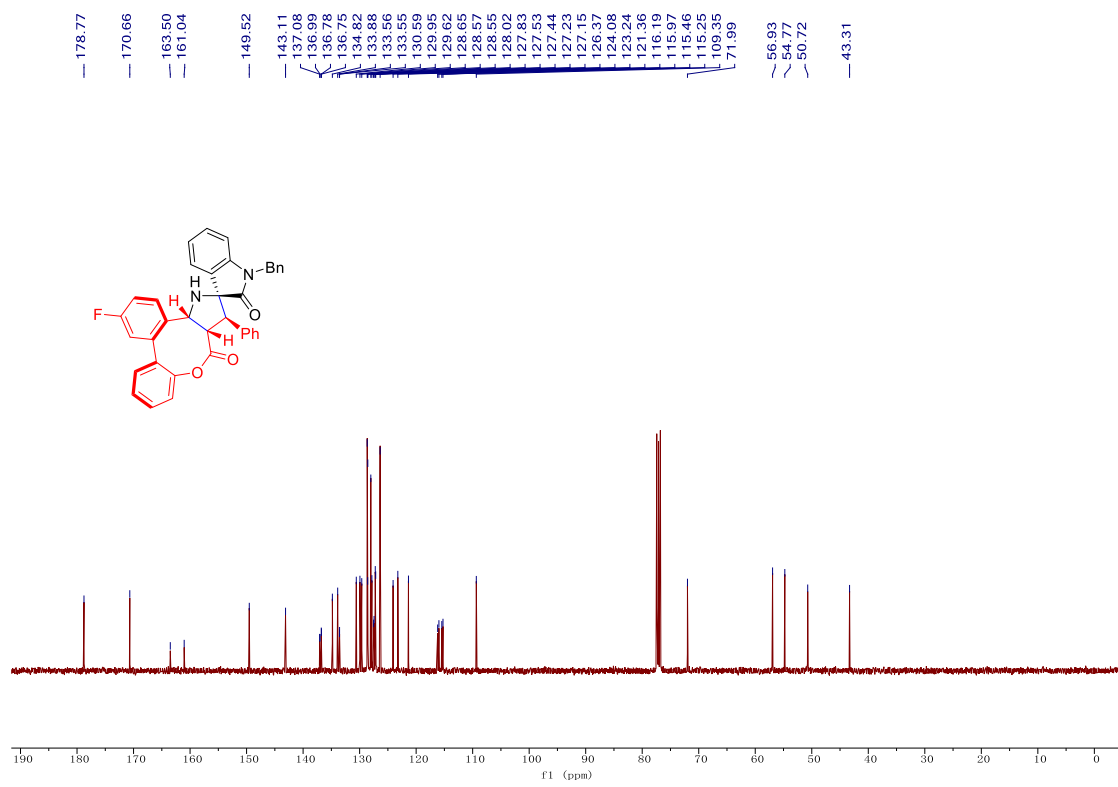

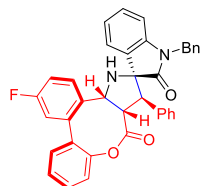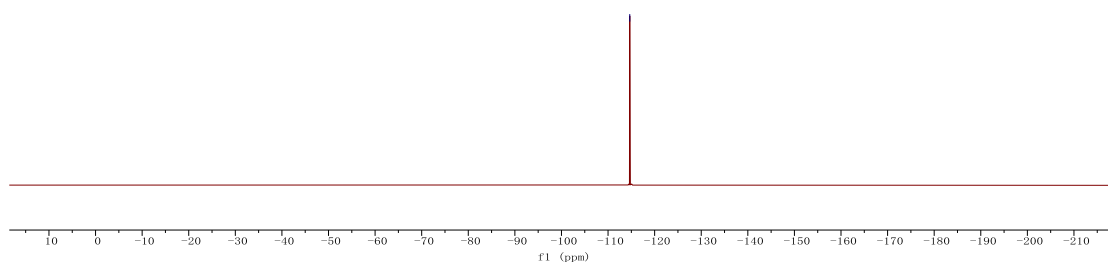

-114.66

4as

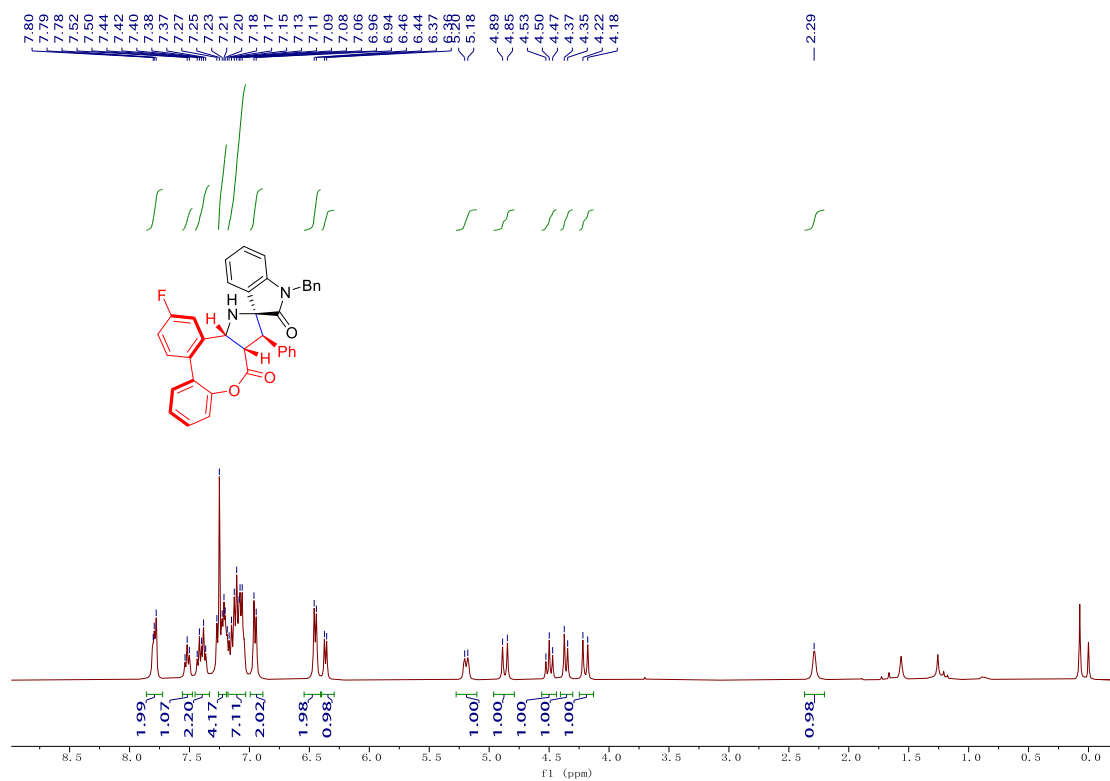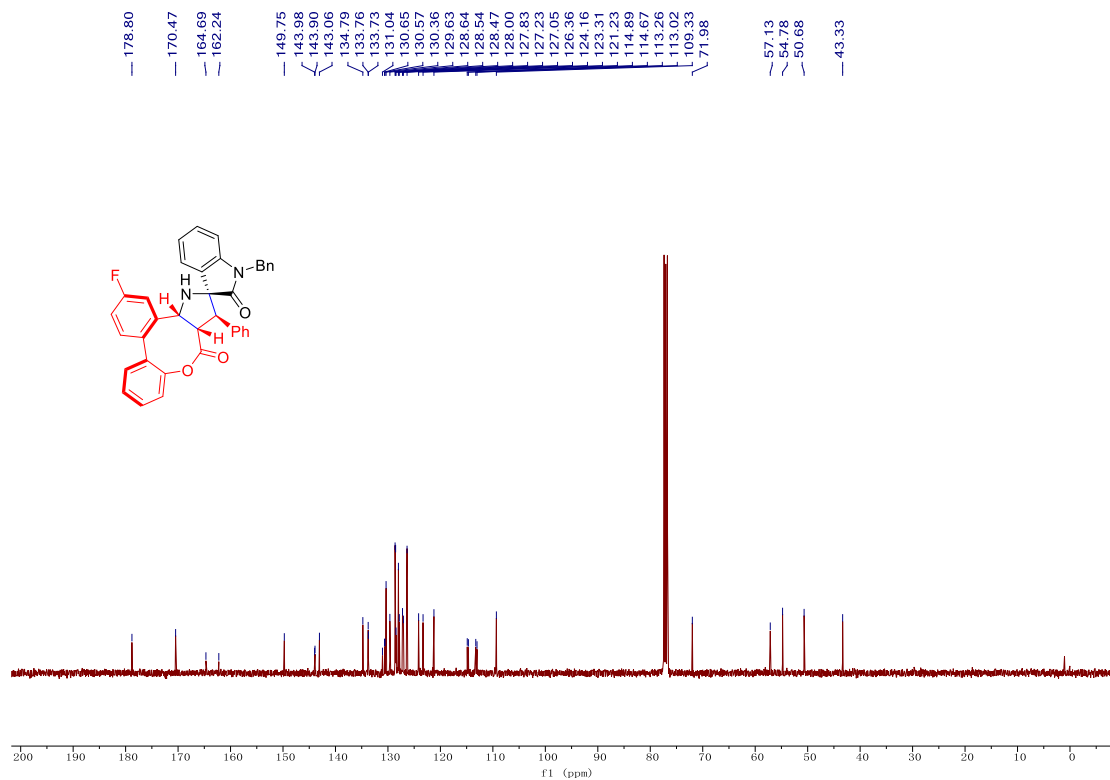

— -112.19

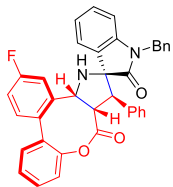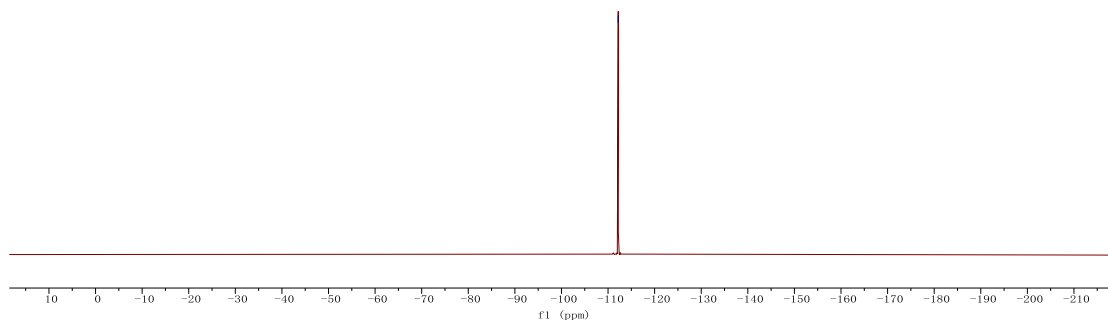

4ba

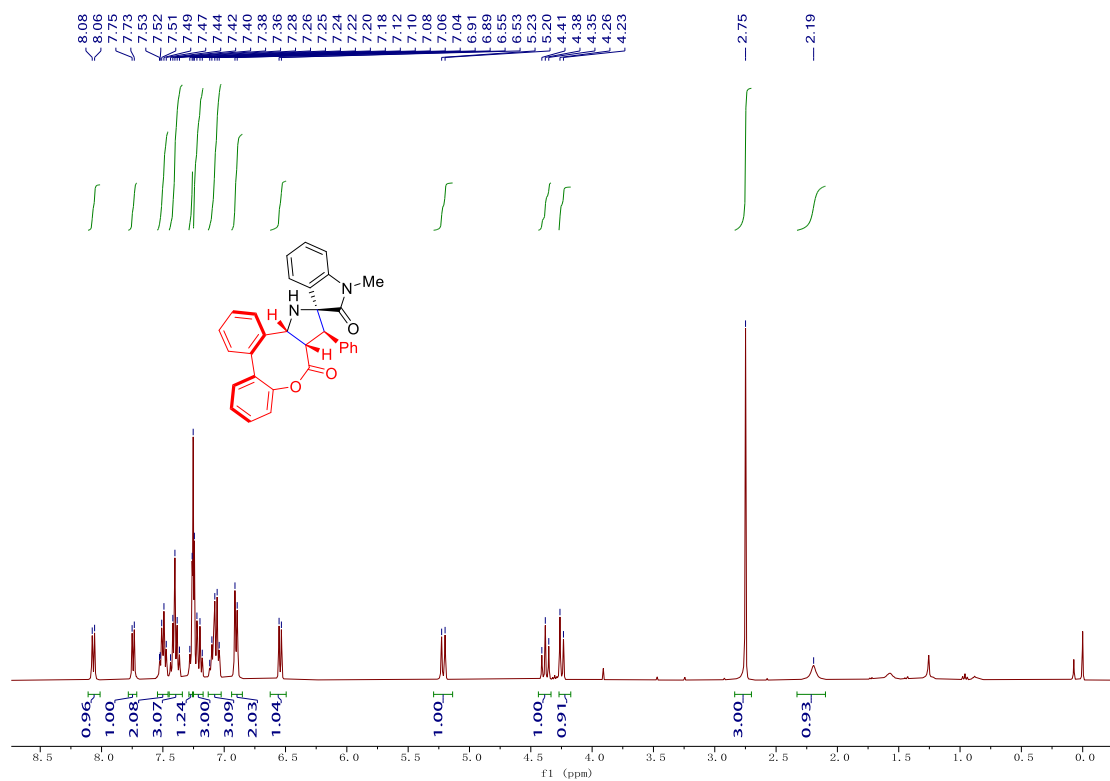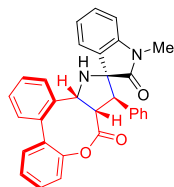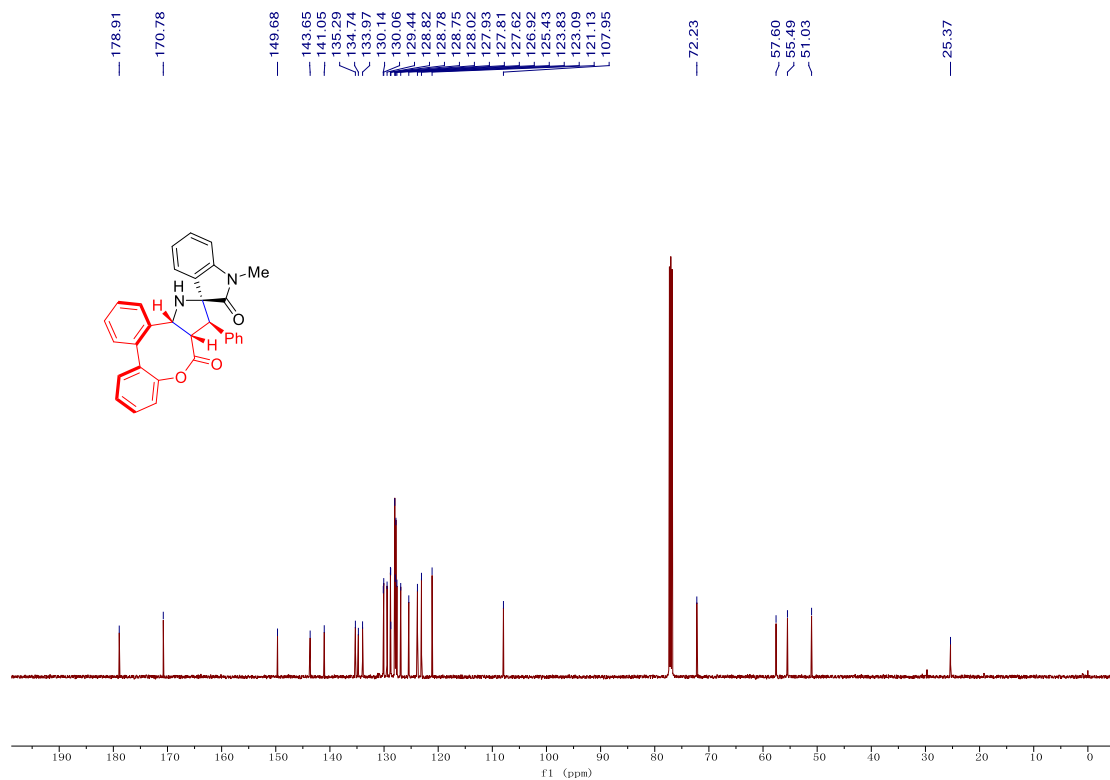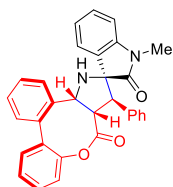

4ca

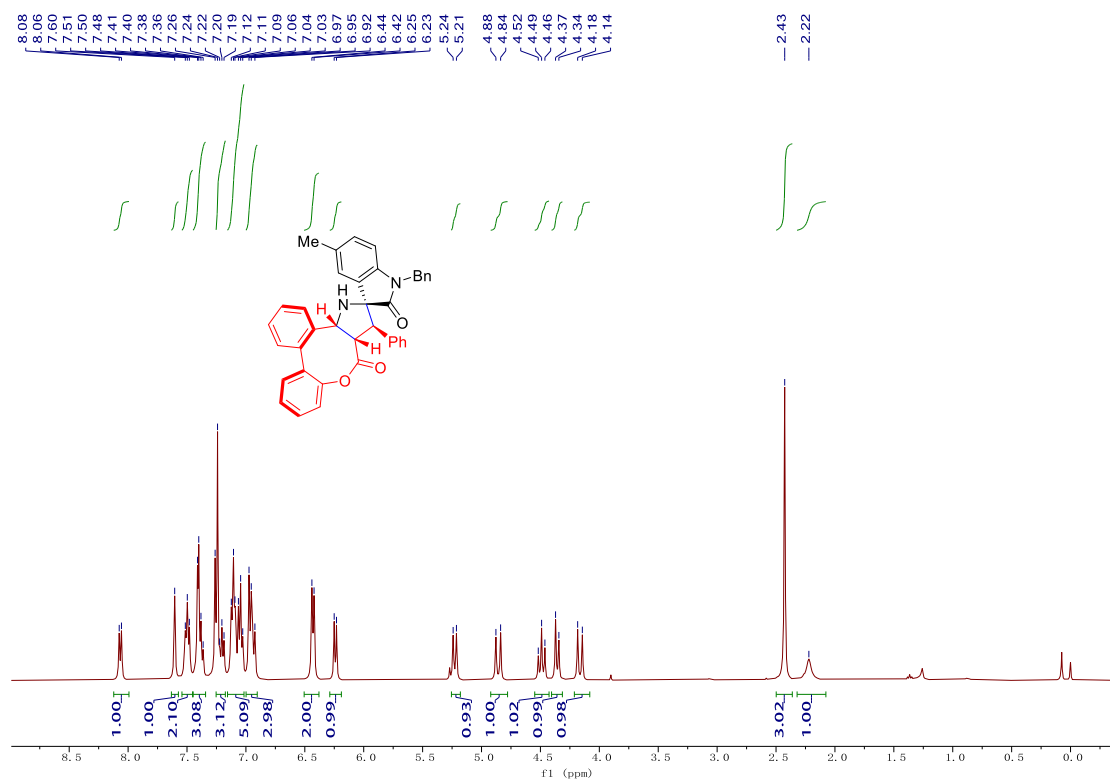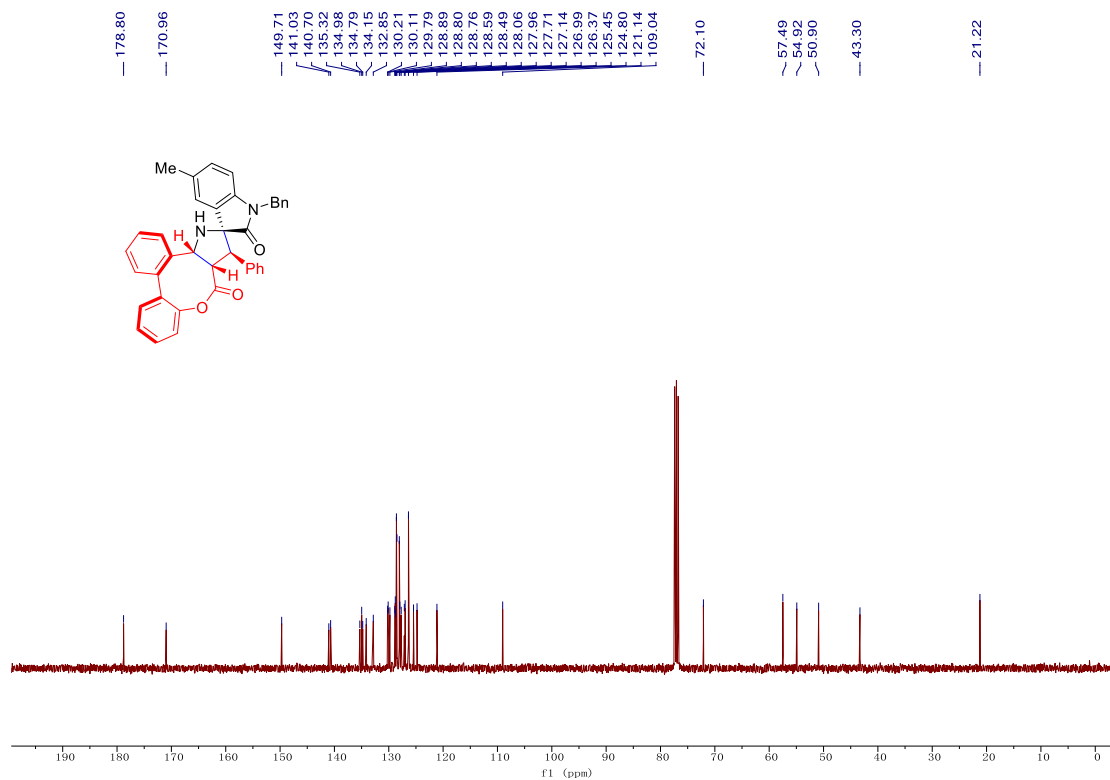



4da

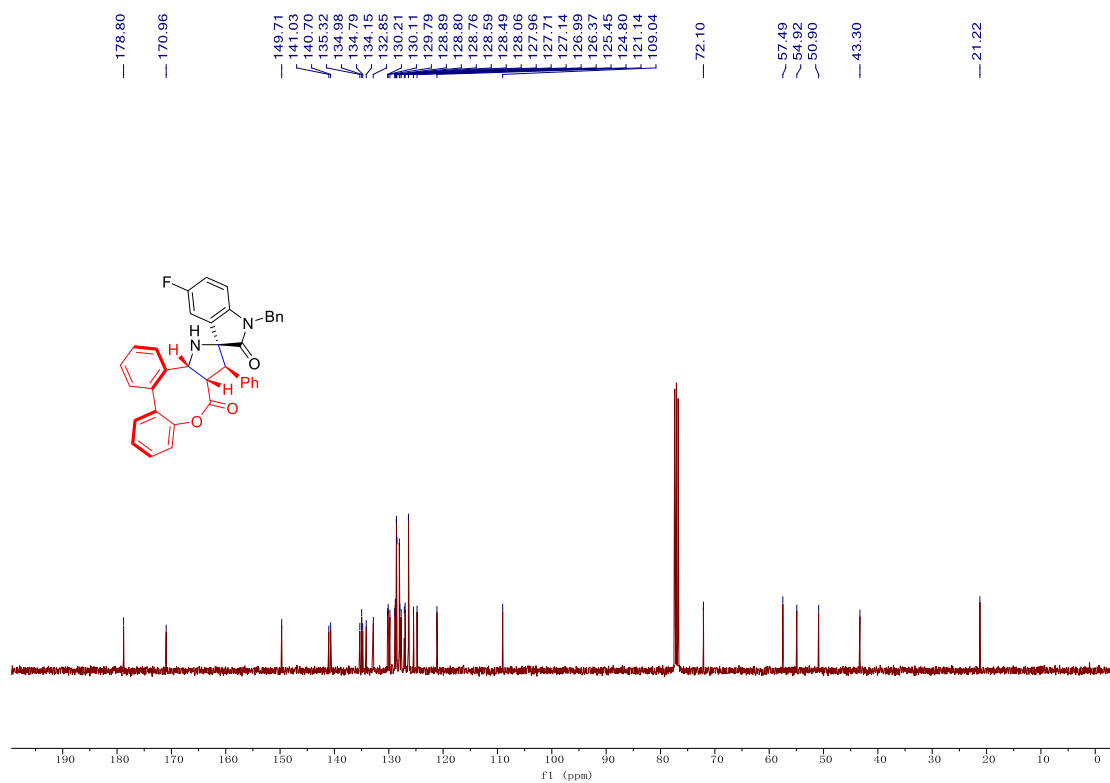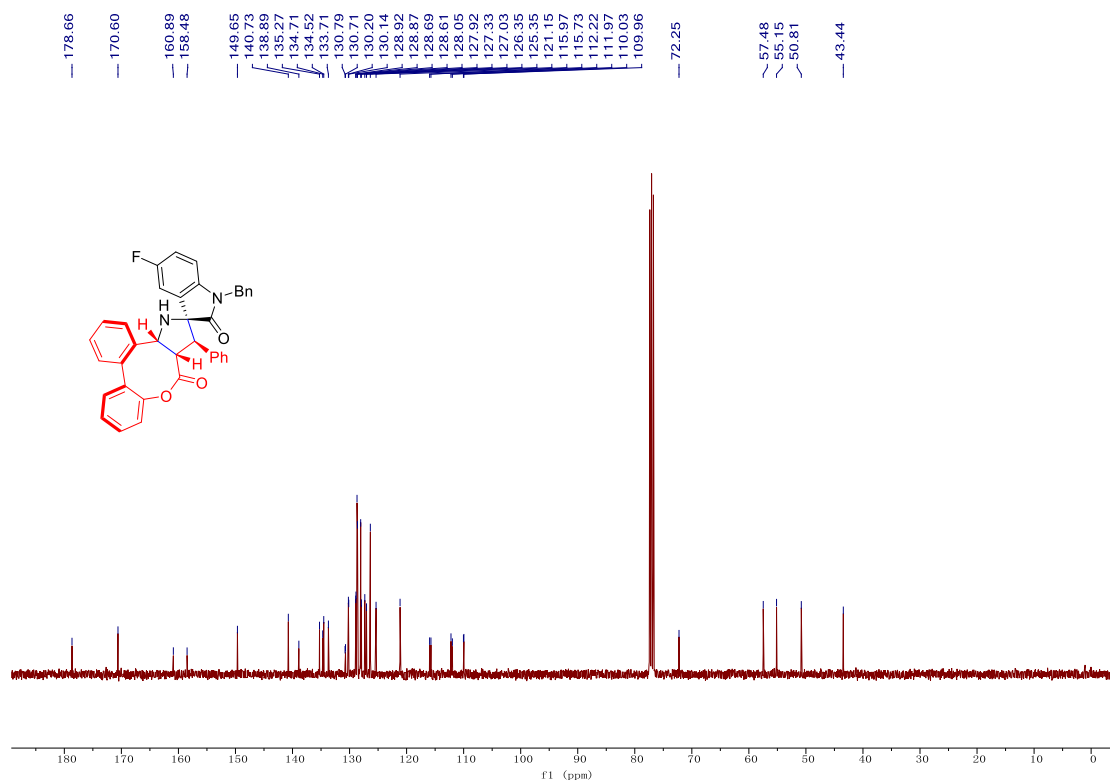

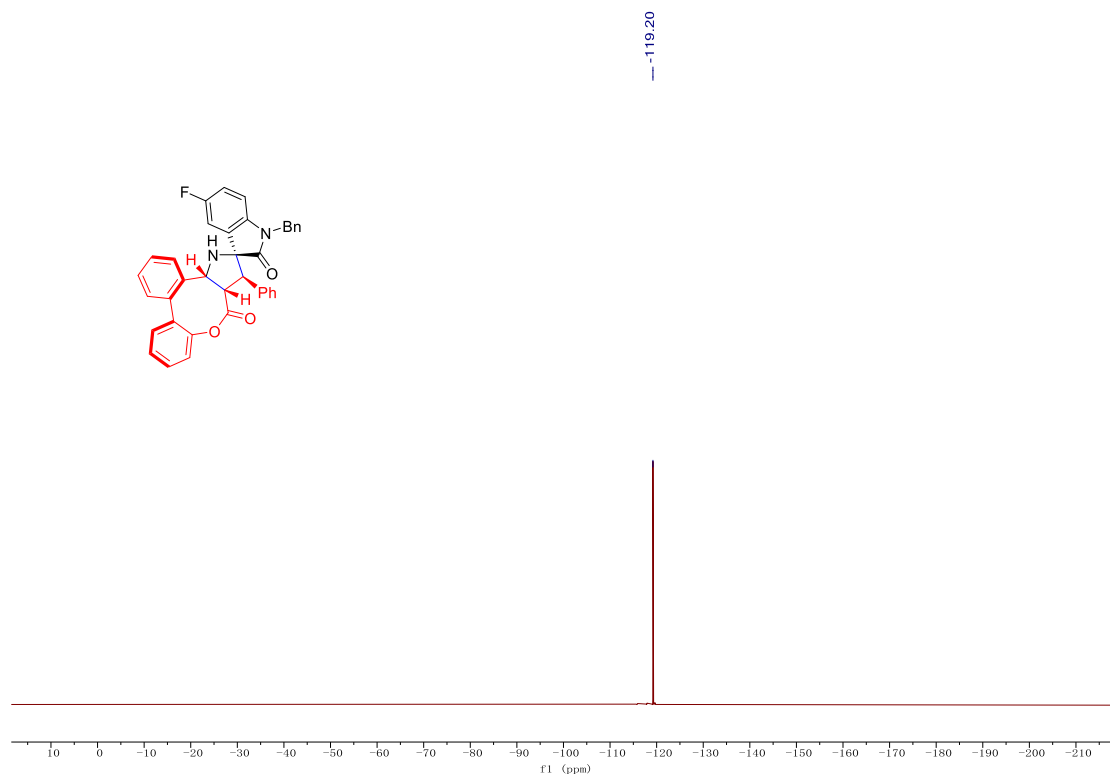

6aa

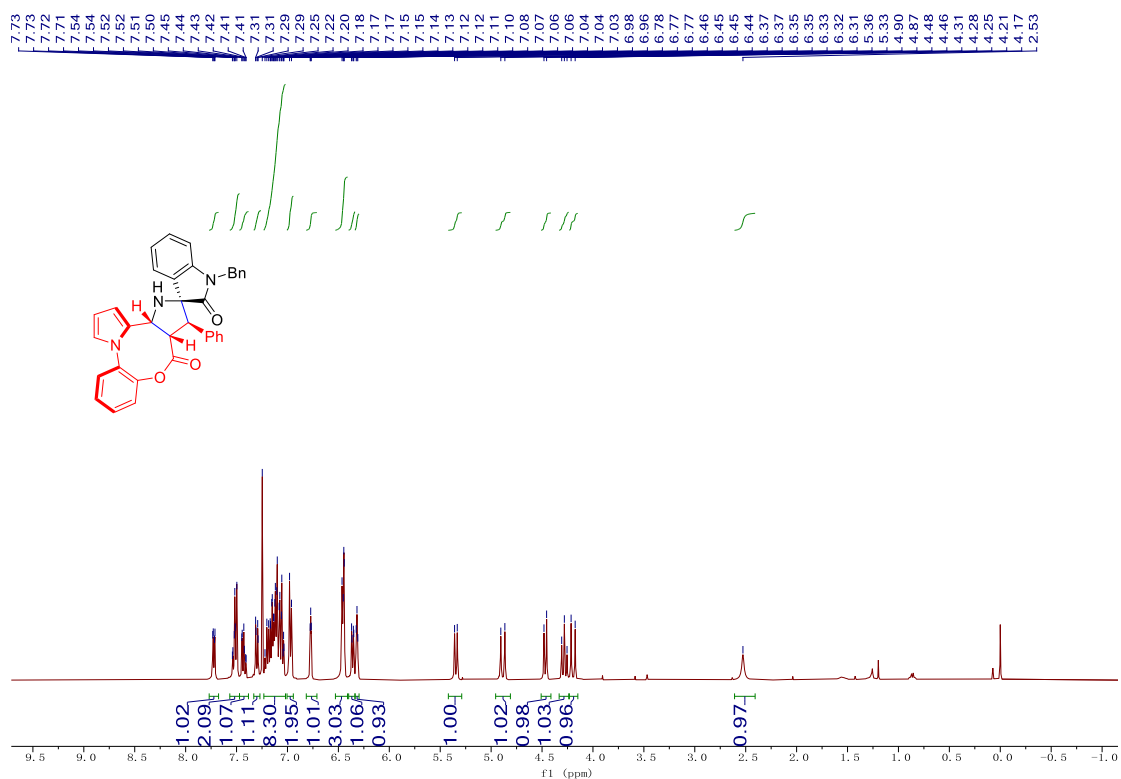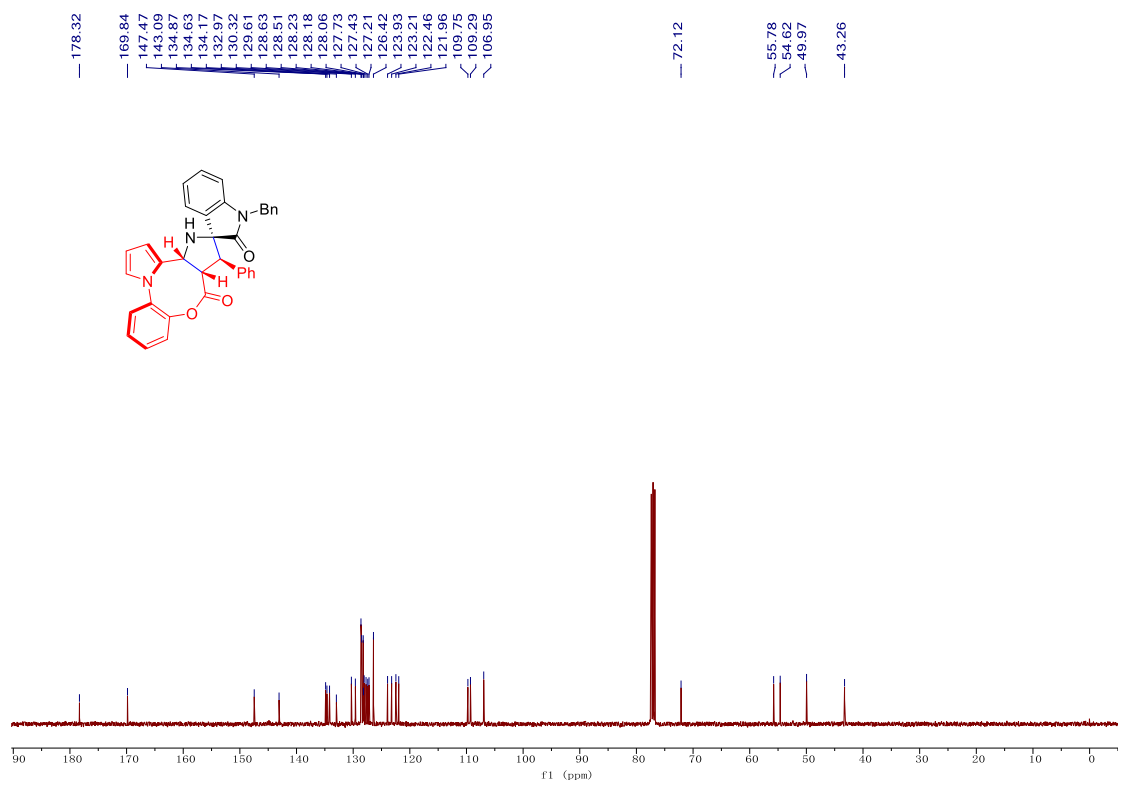

**6ab**

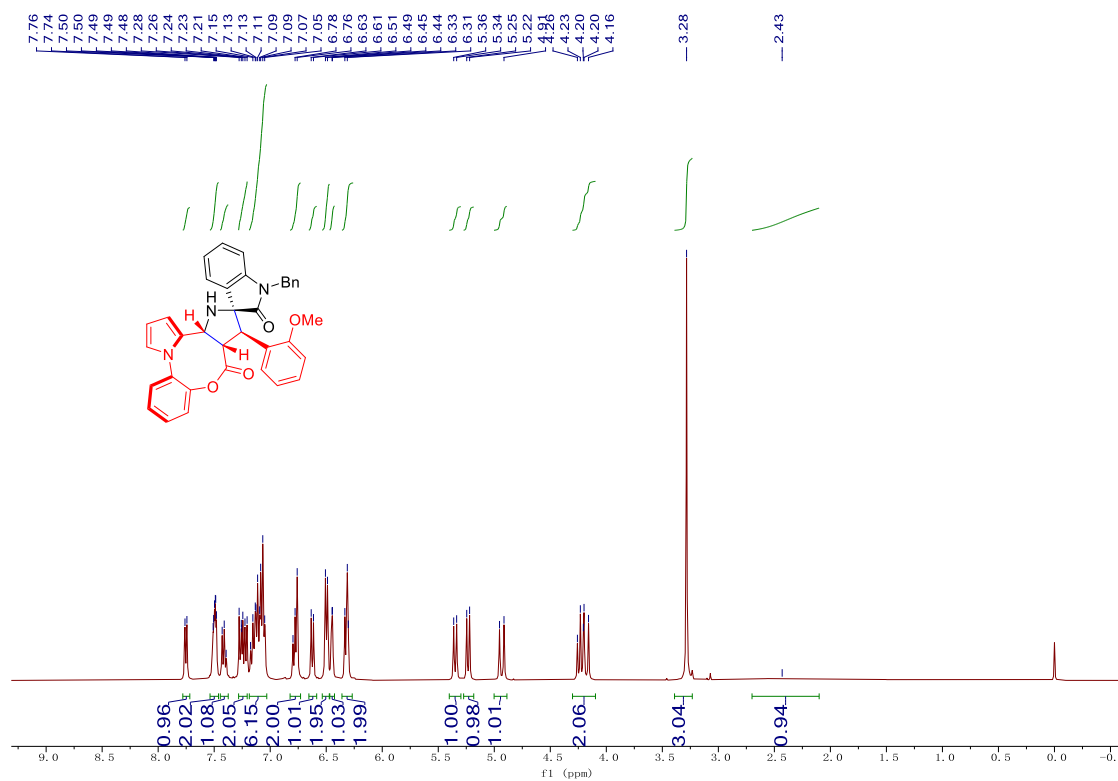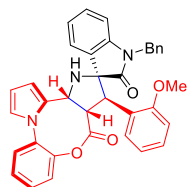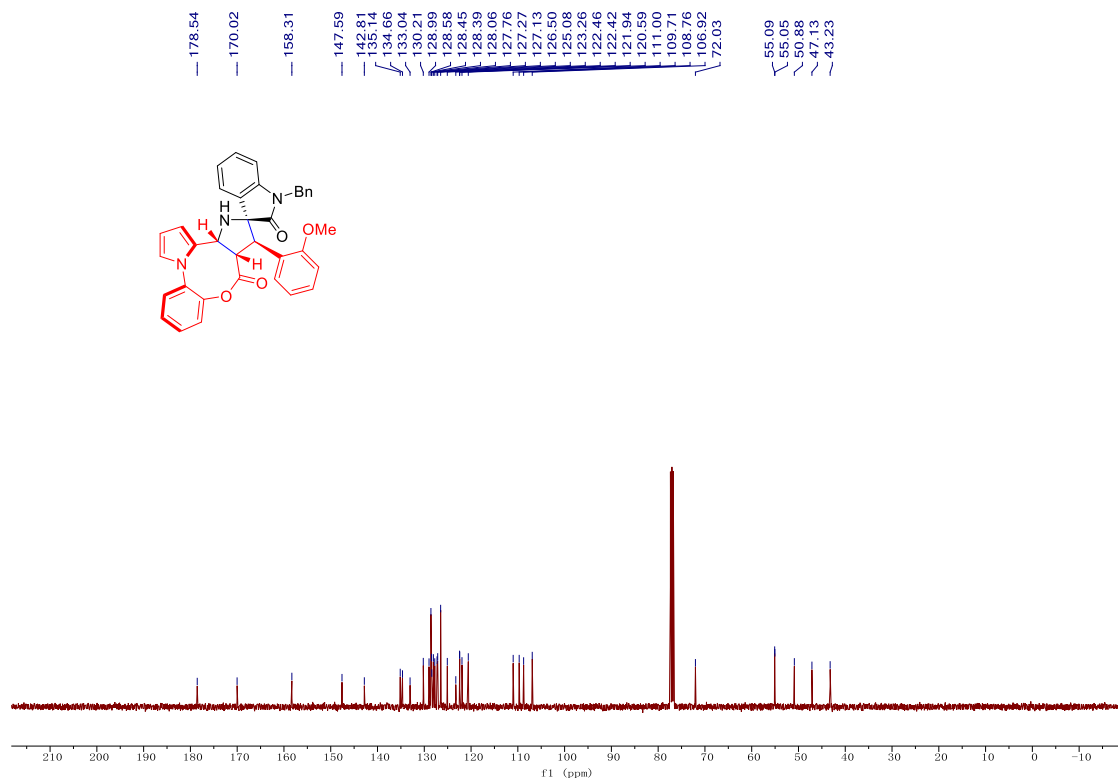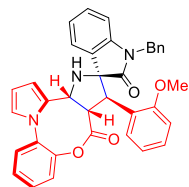

6ac

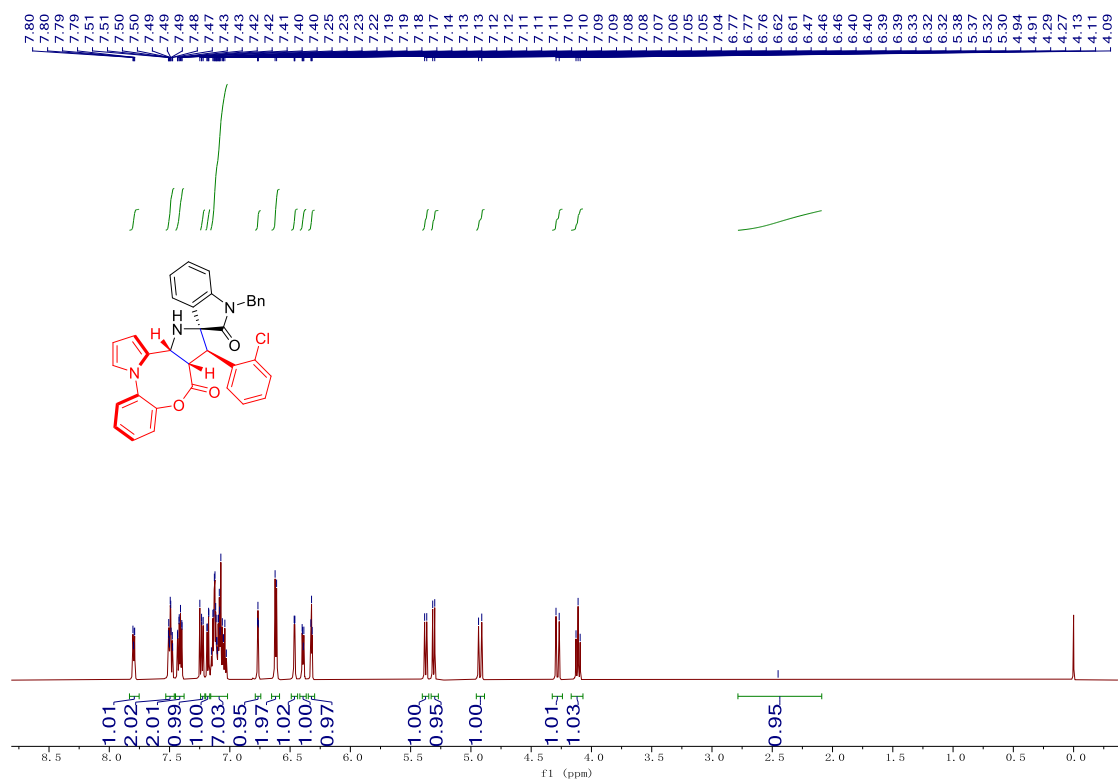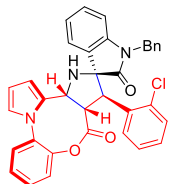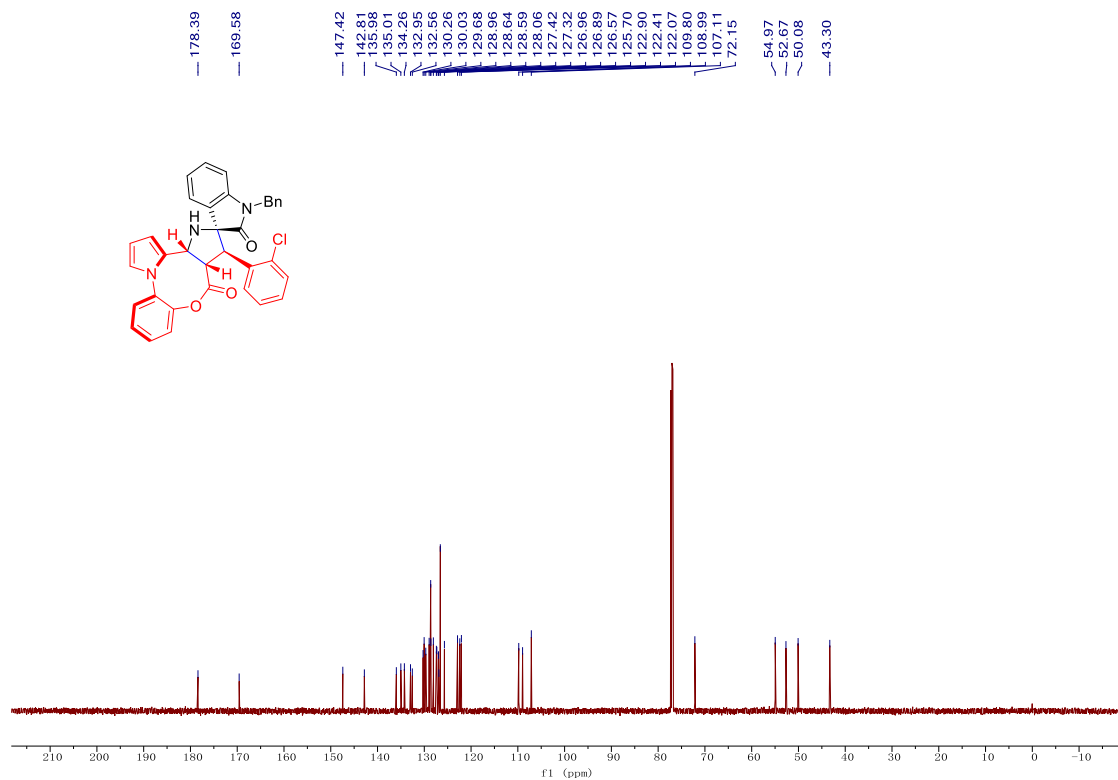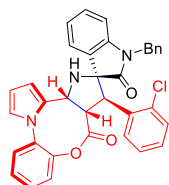

6ad

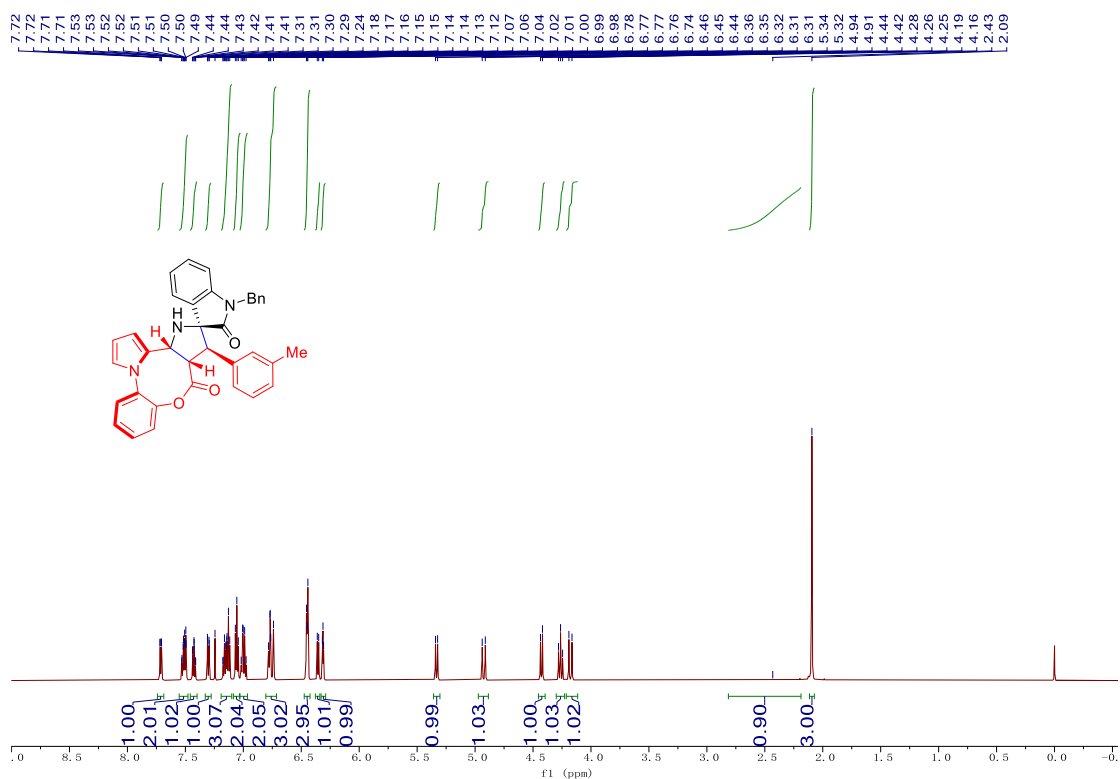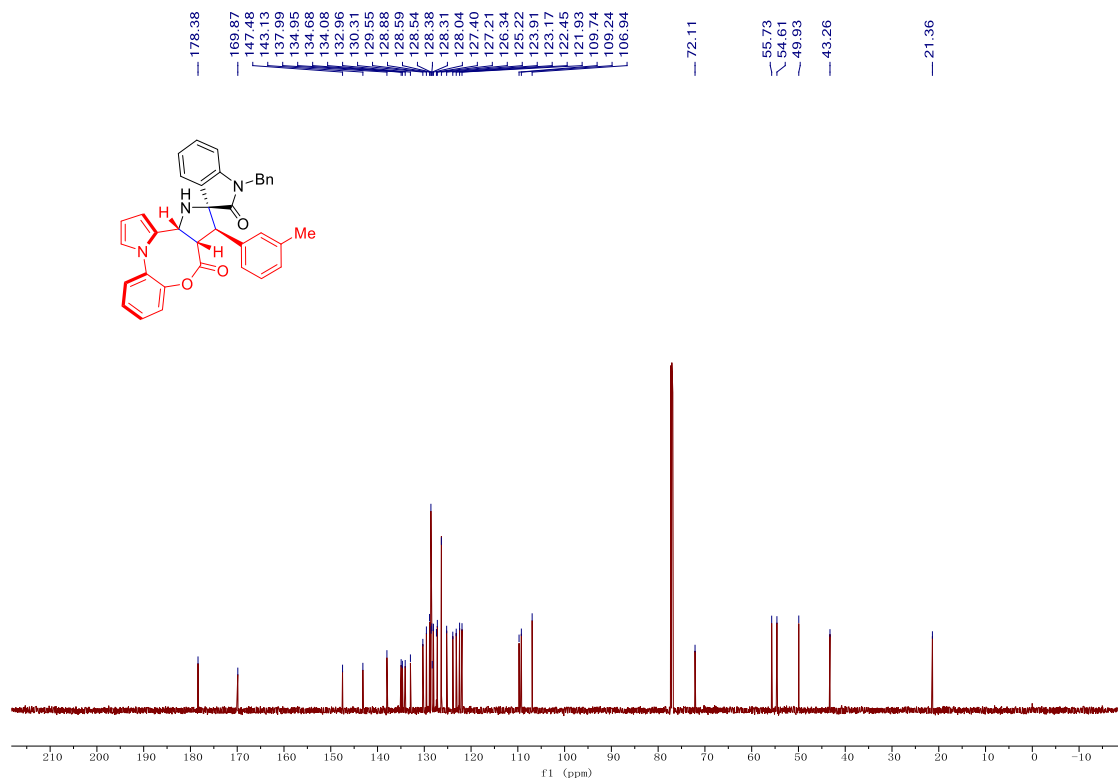

6ae

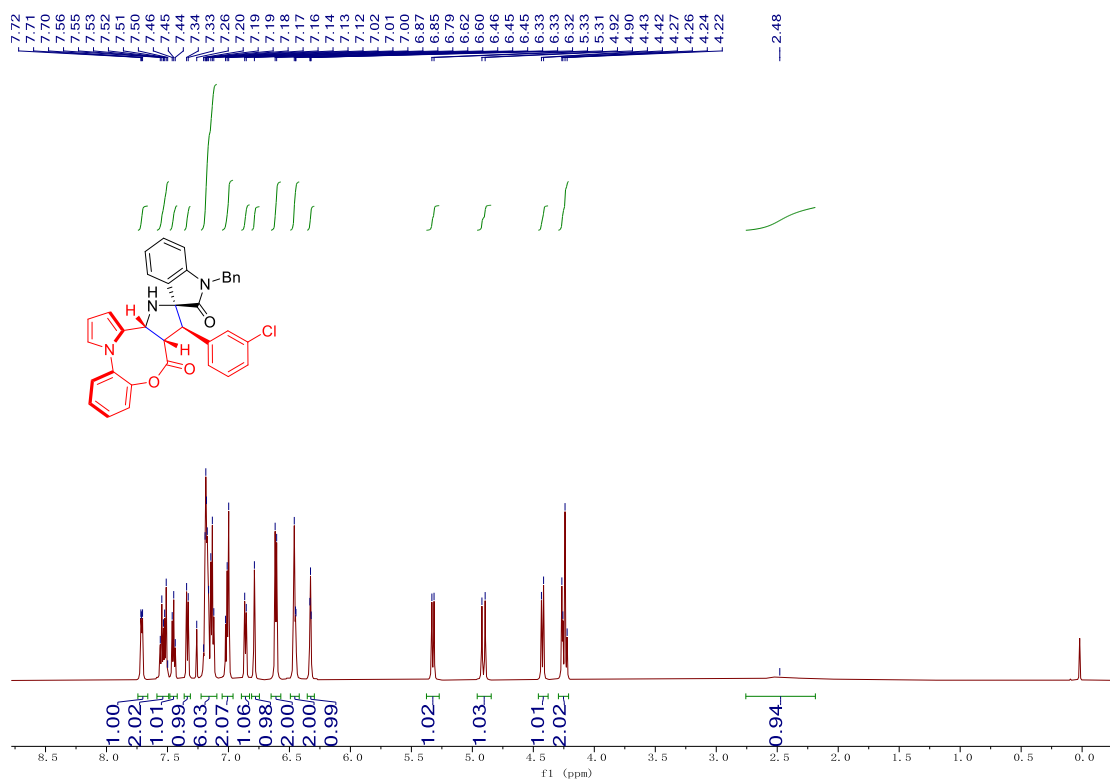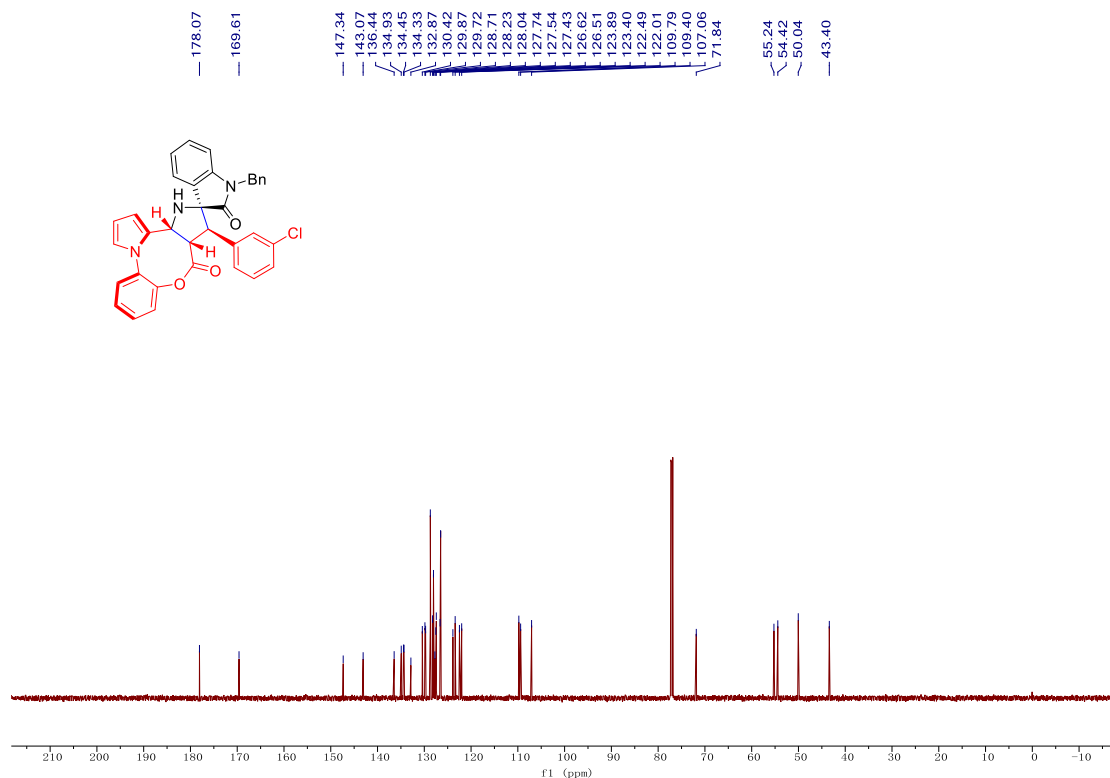

6af

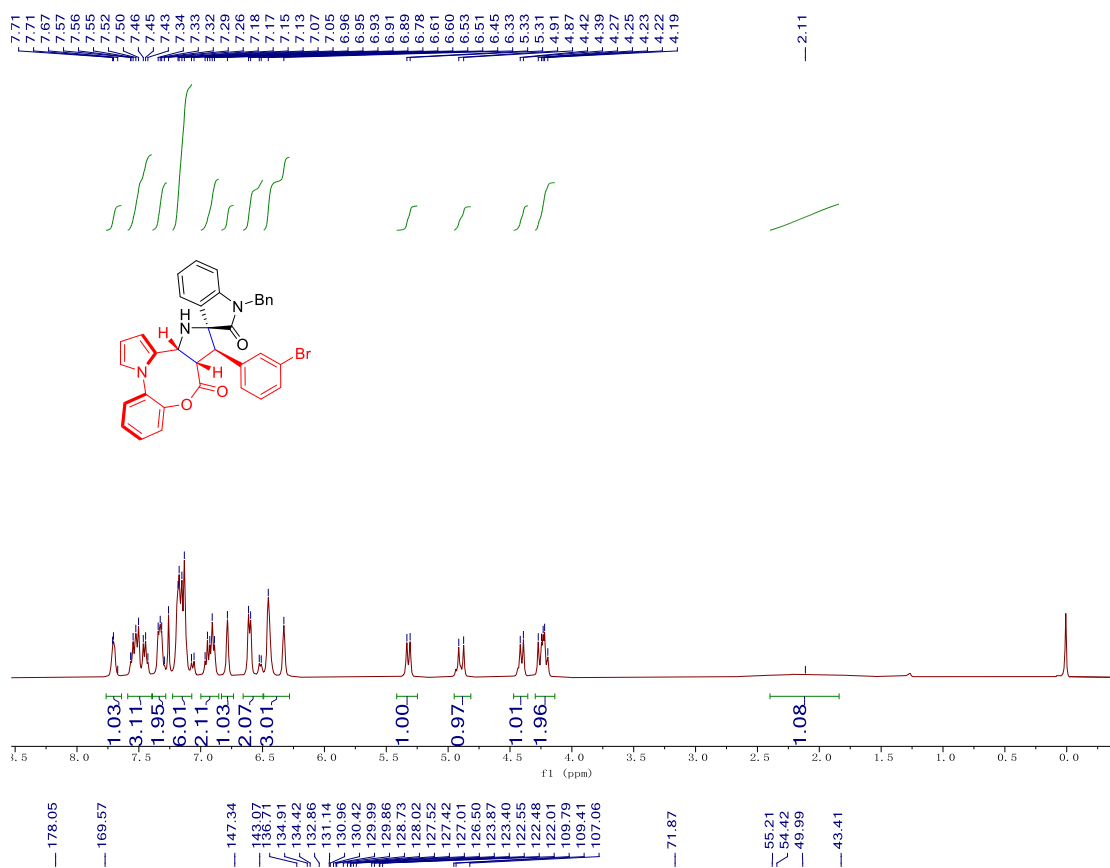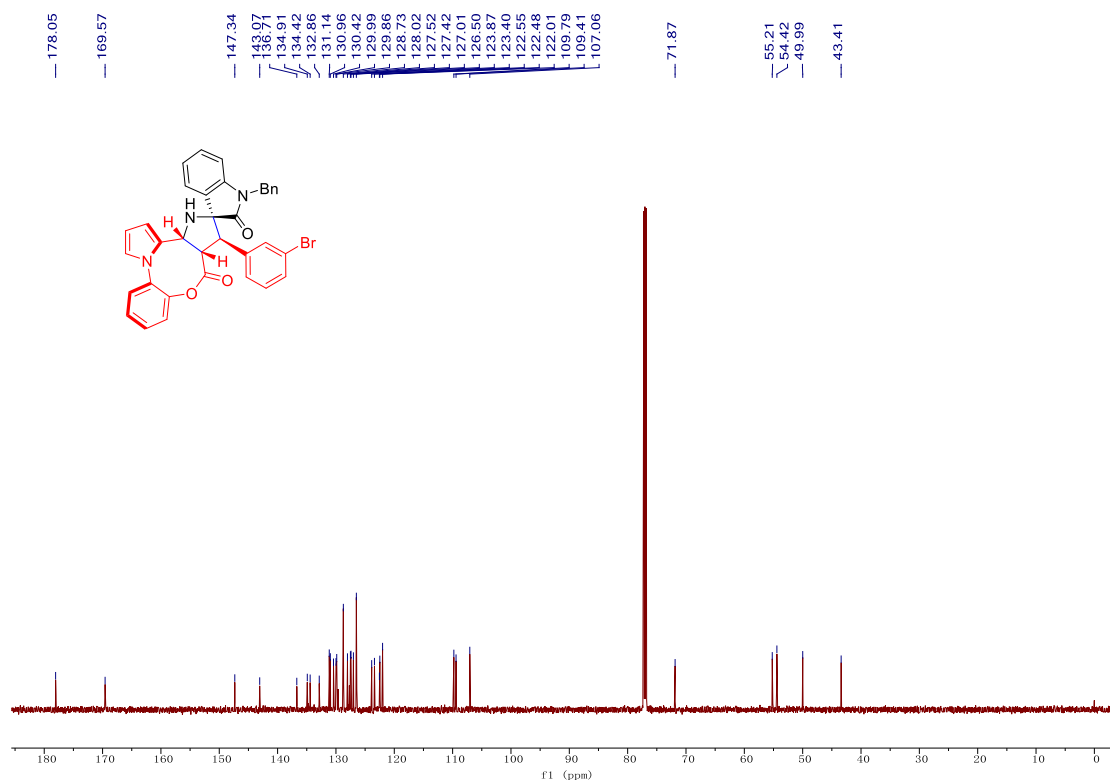



6ag

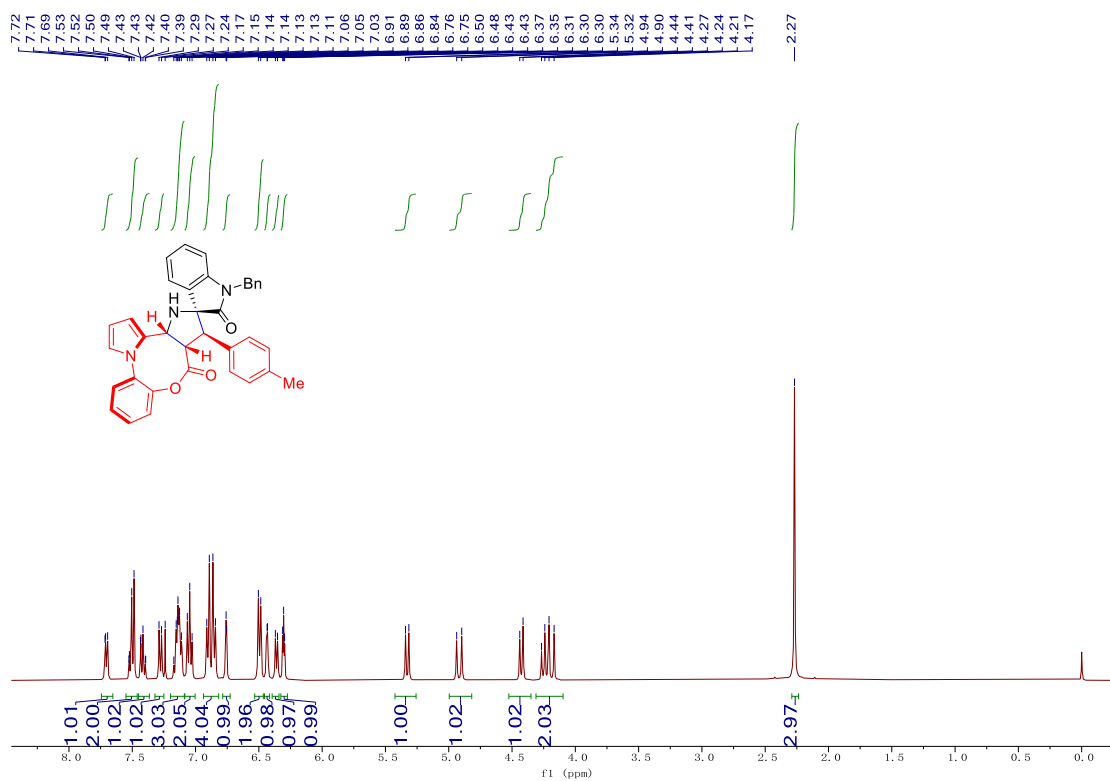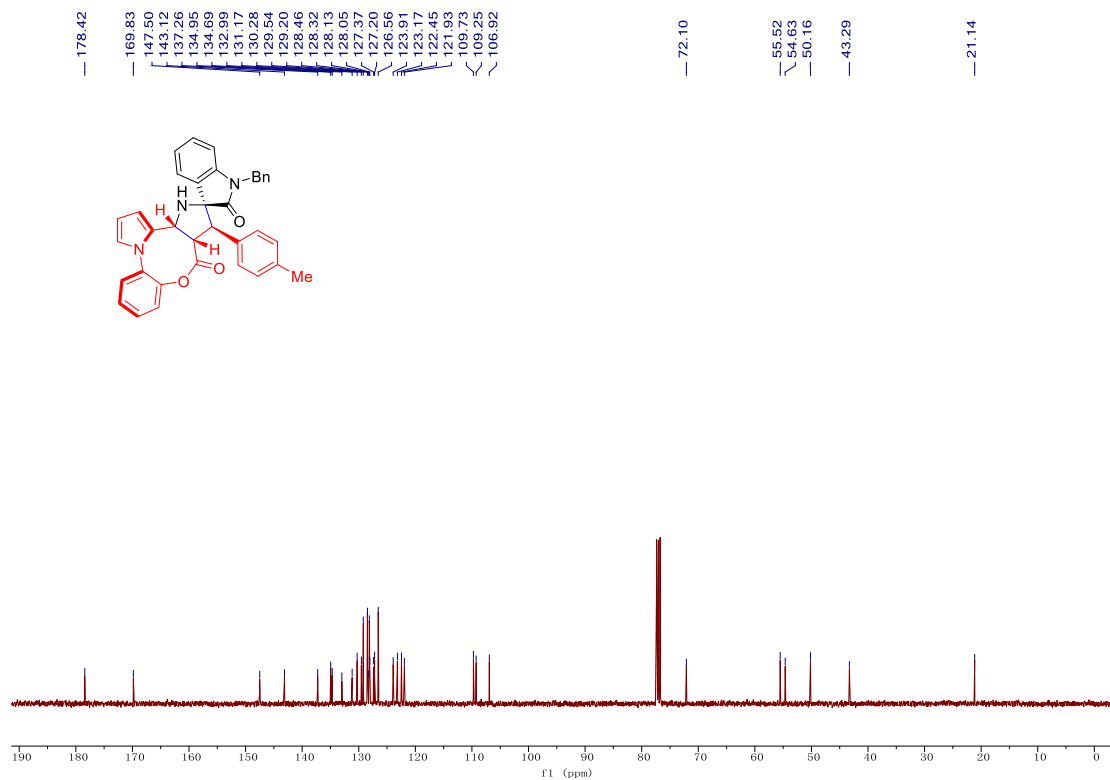

6ah

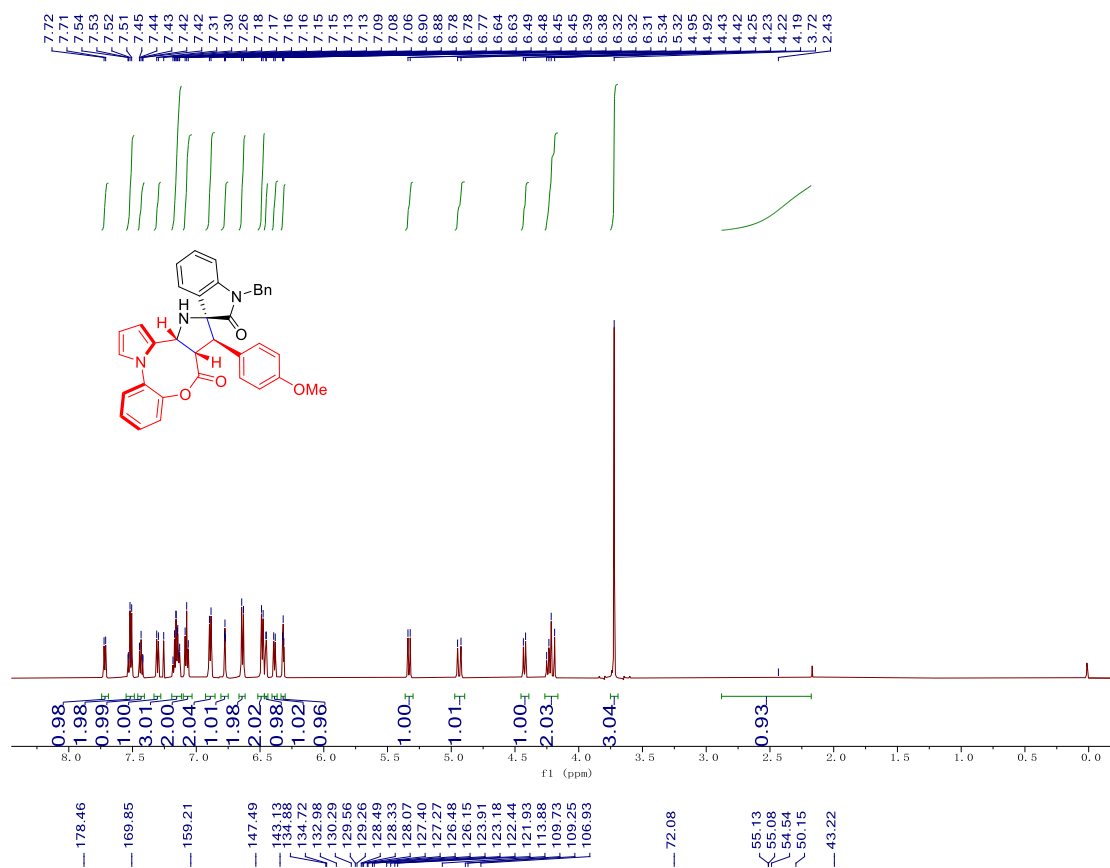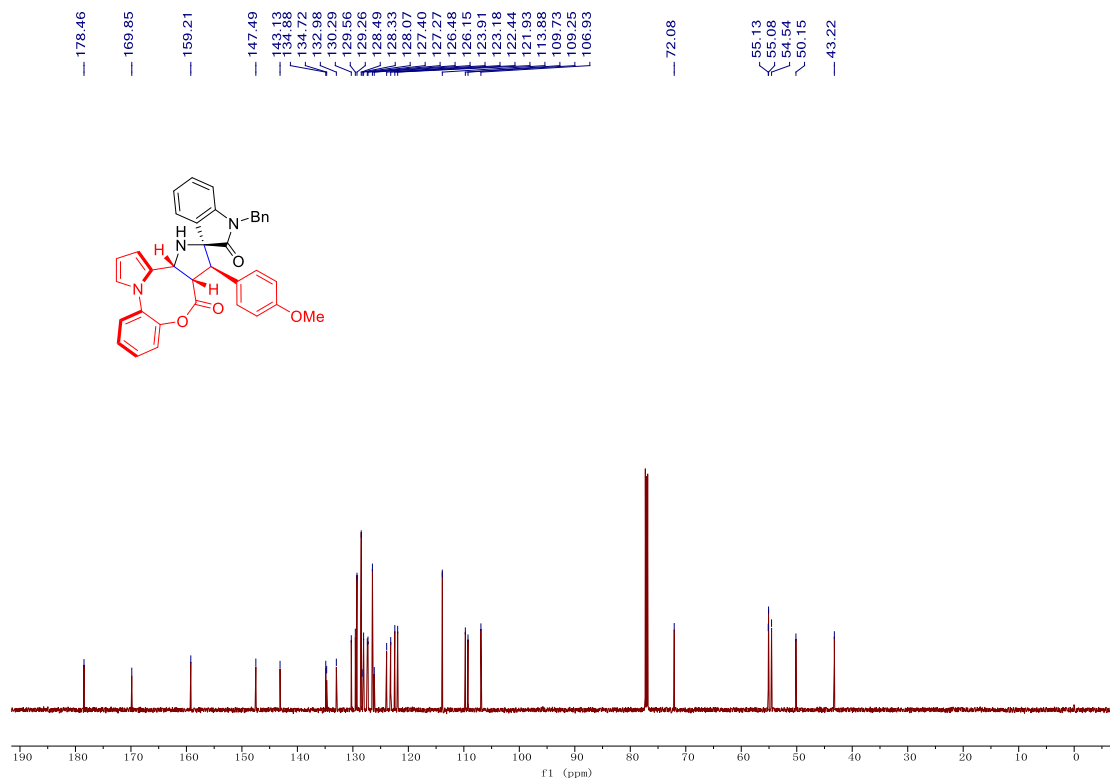

6ai

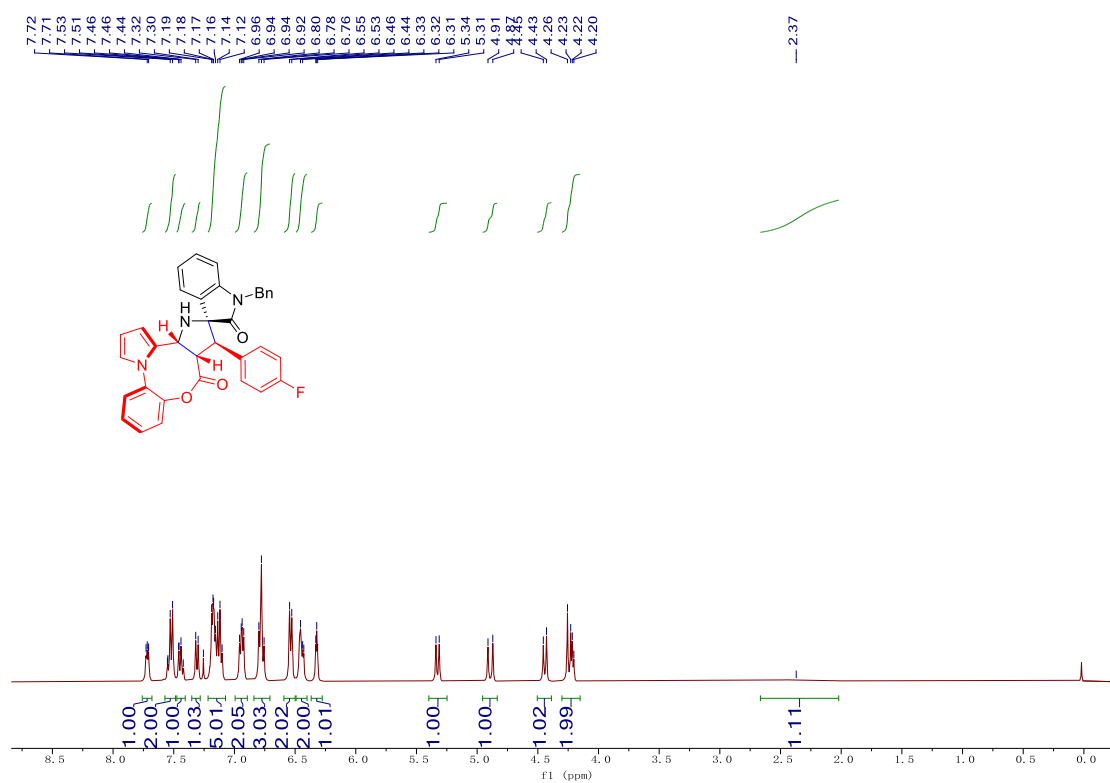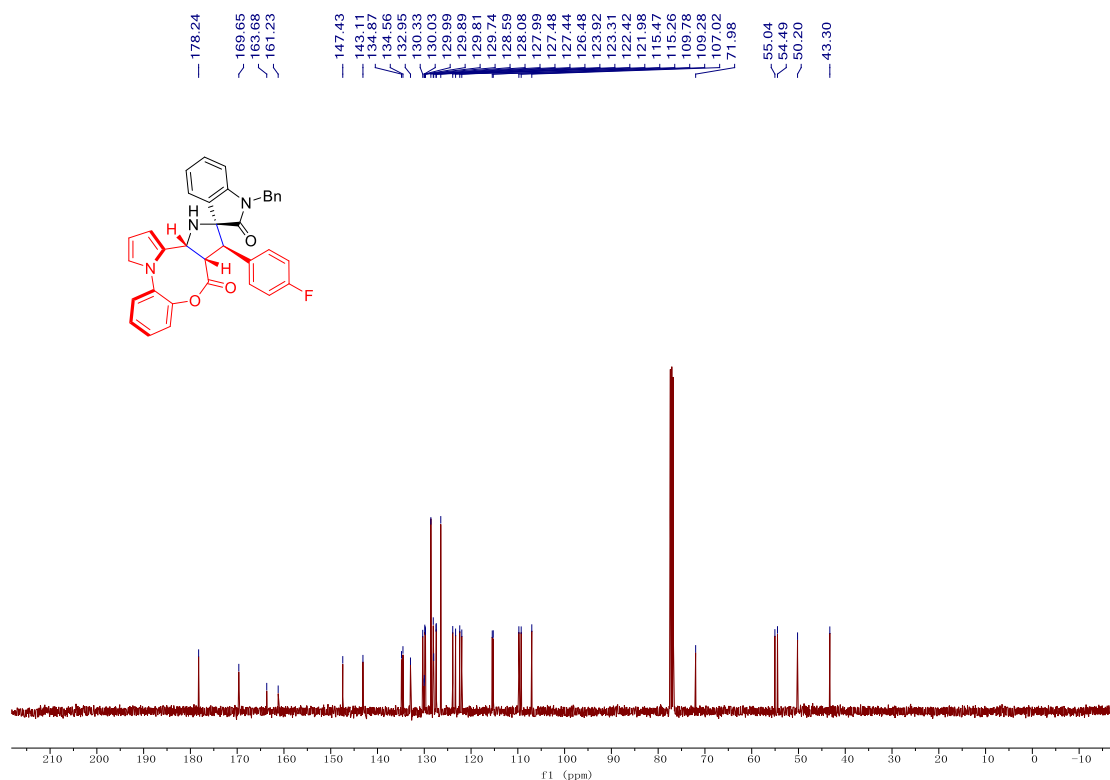

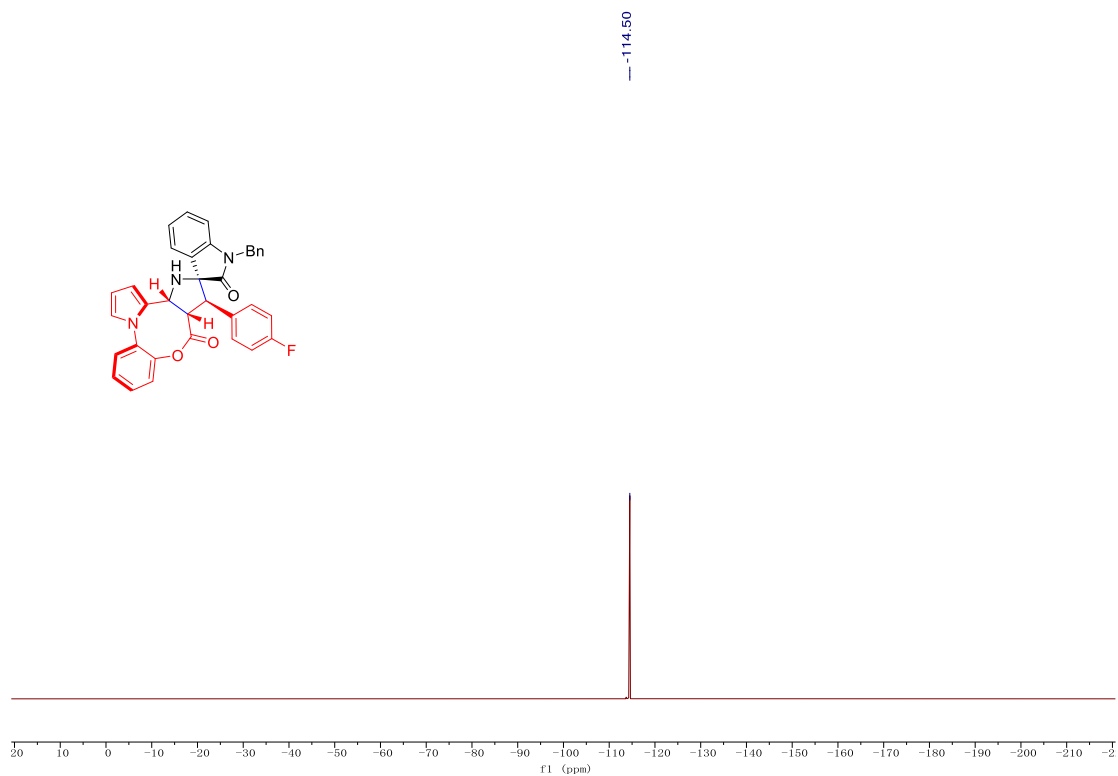

6aj

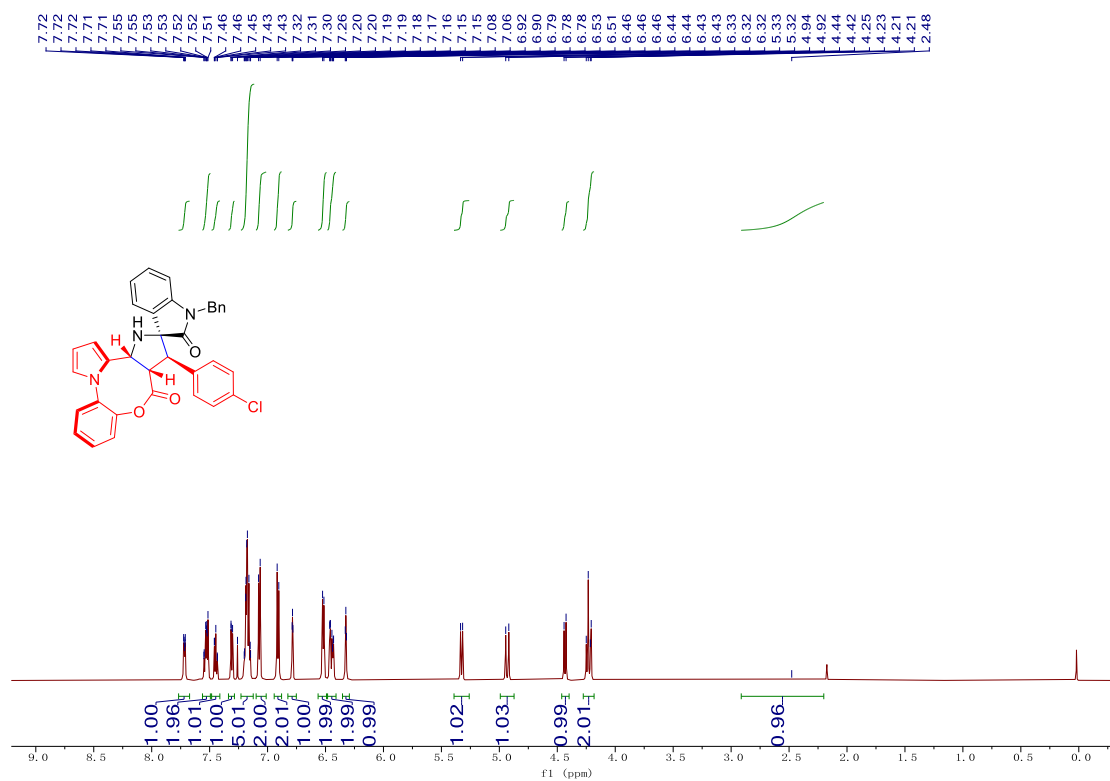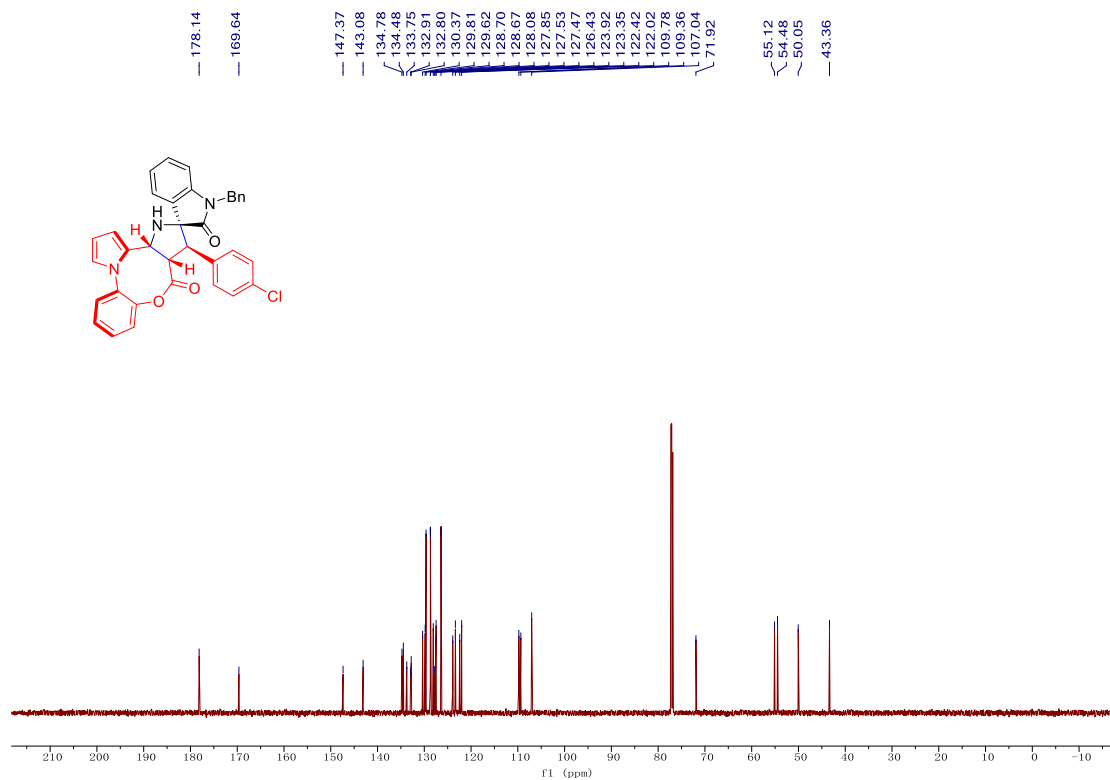

6ak

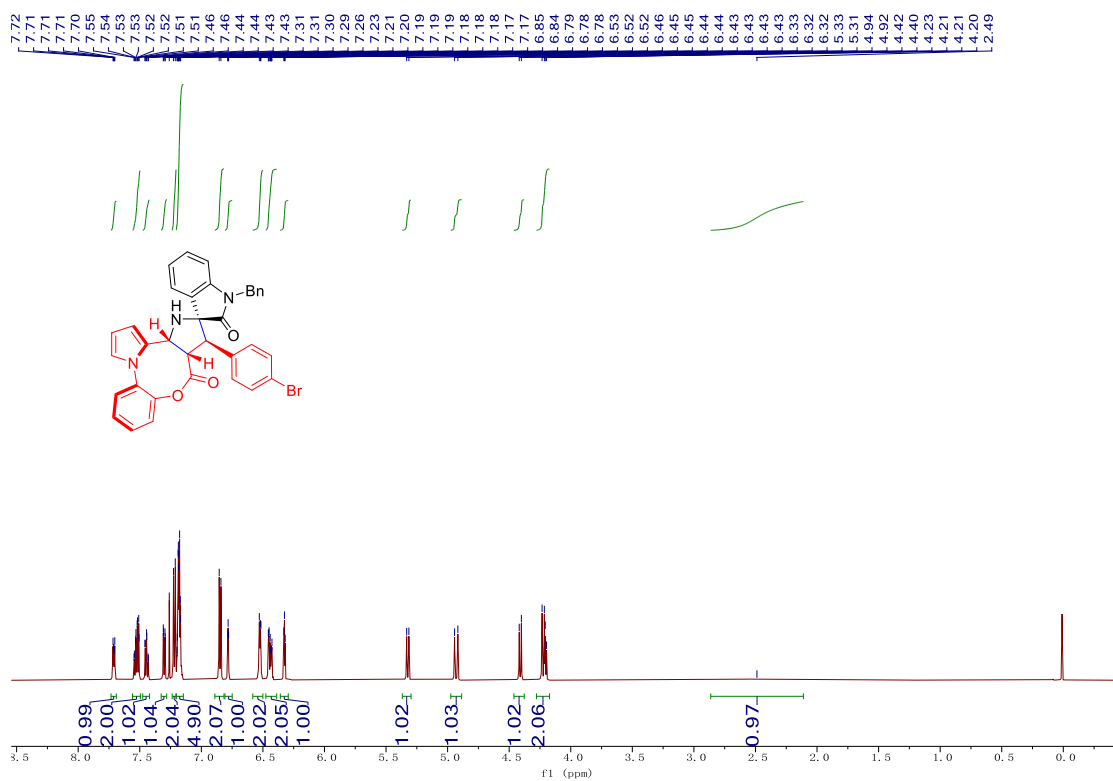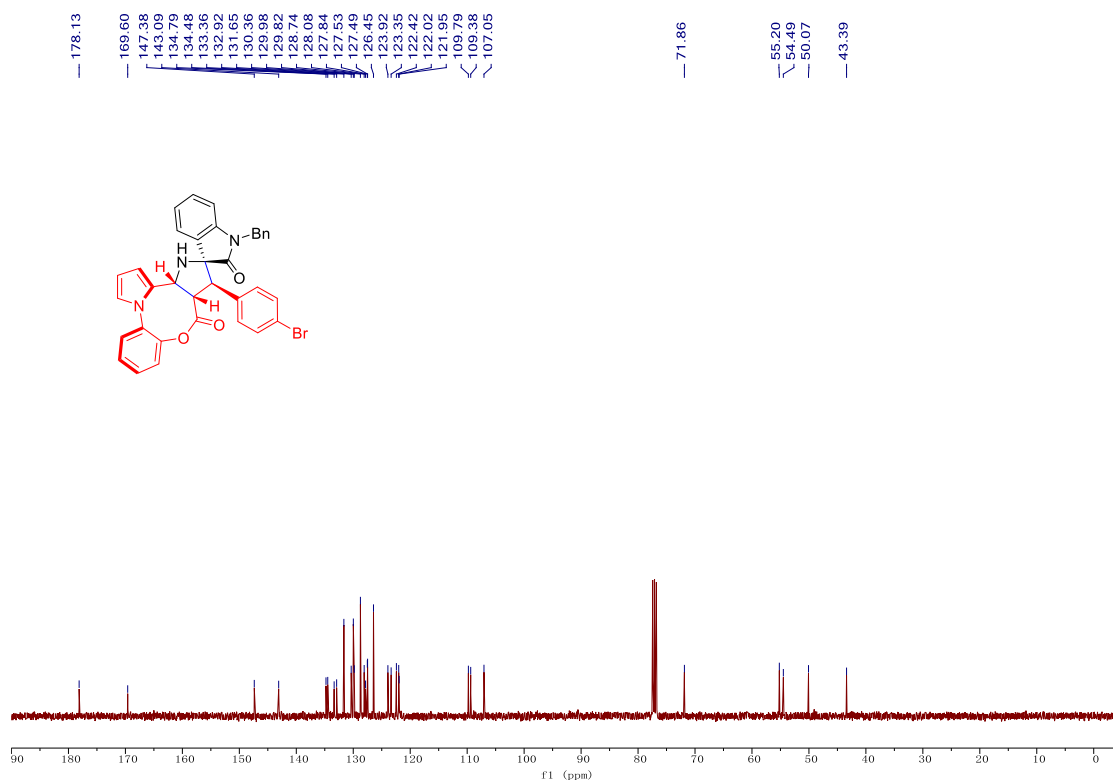

6al

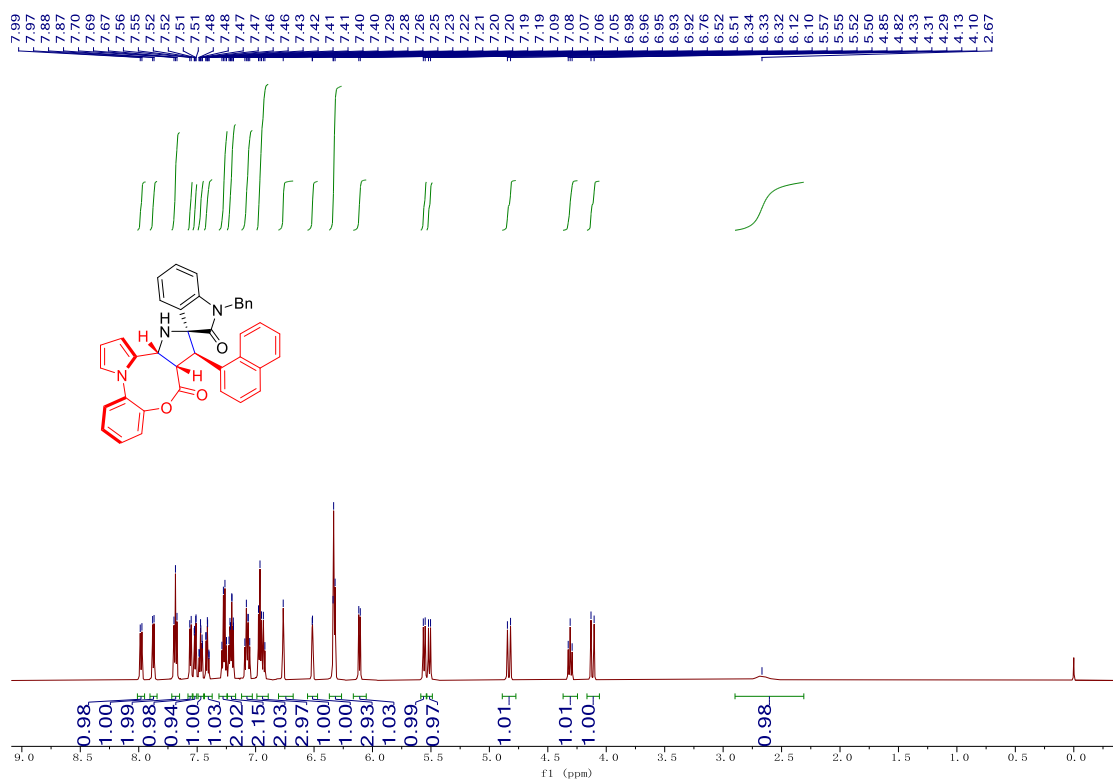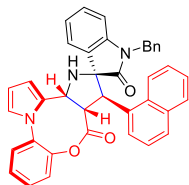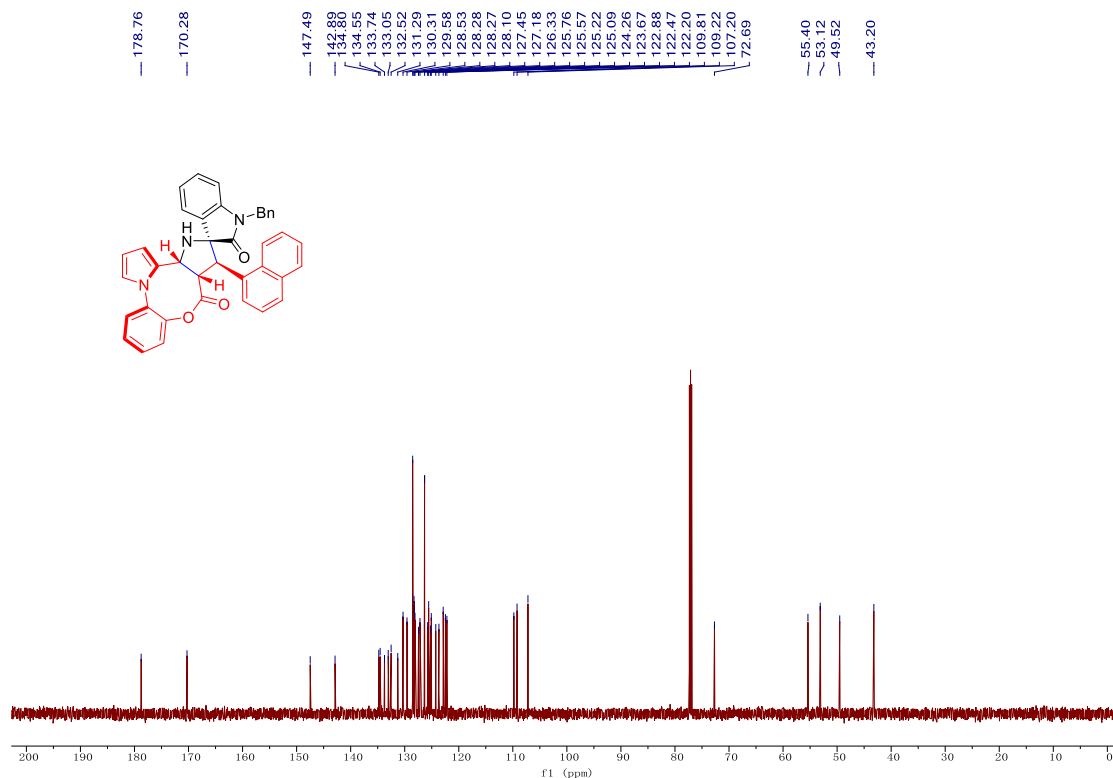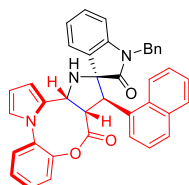

6am

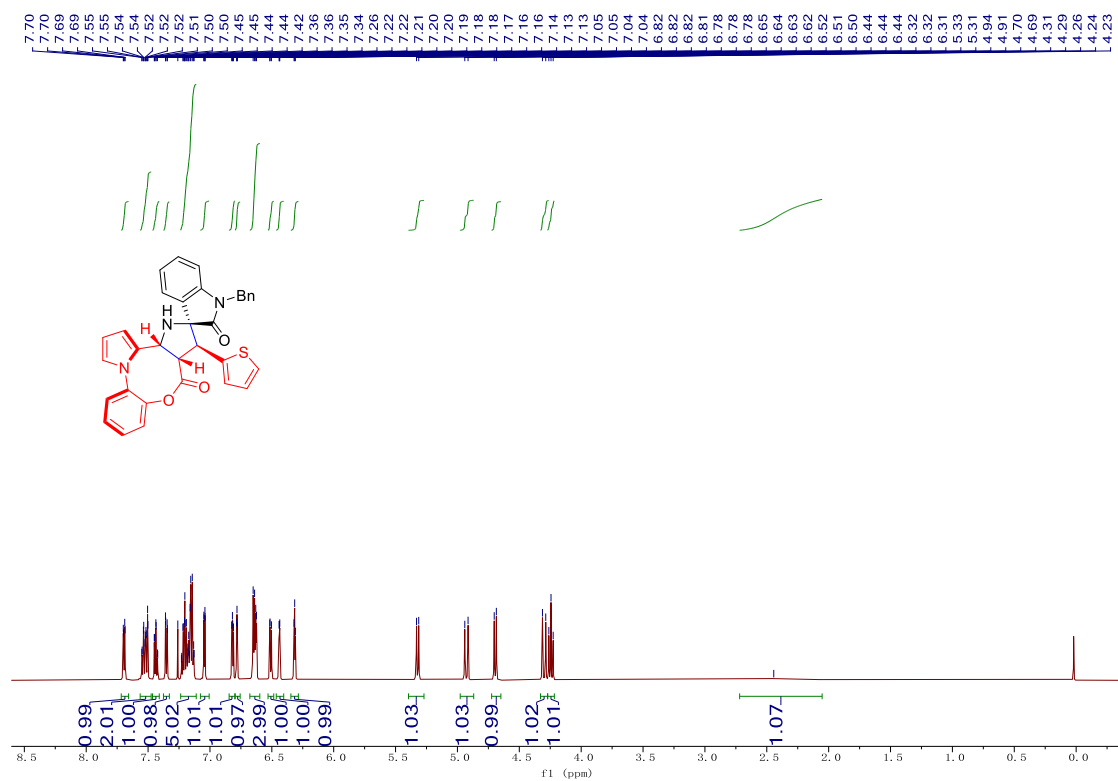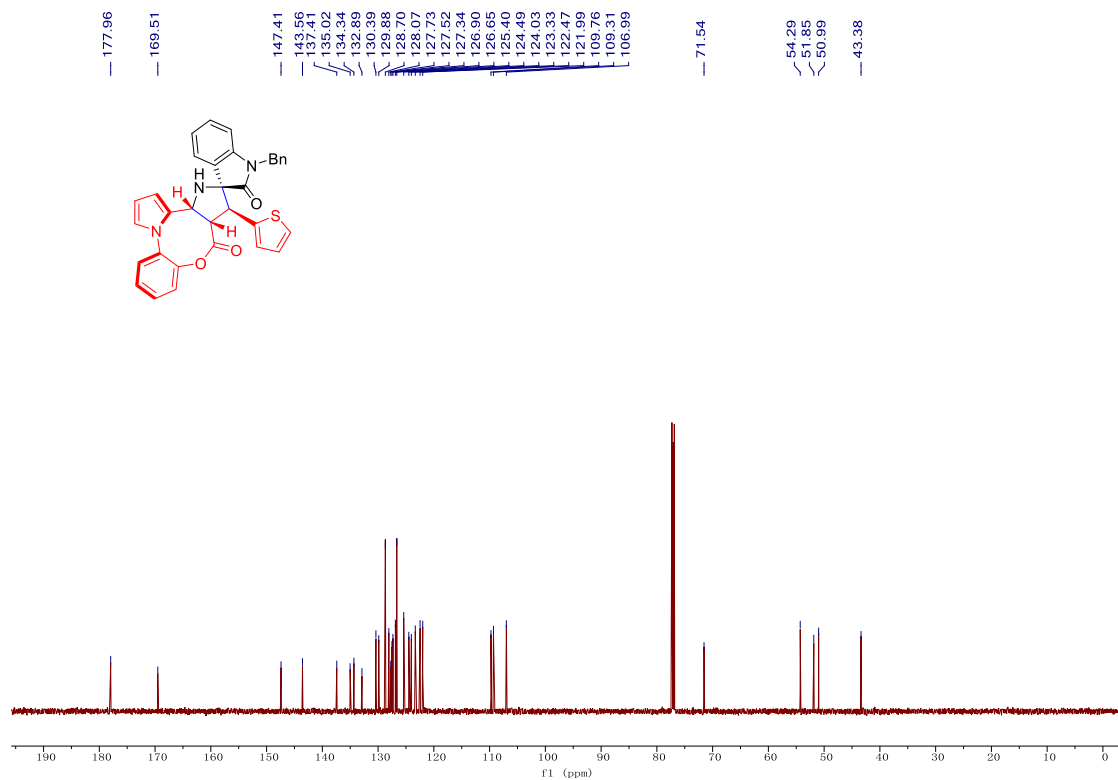



**6an**

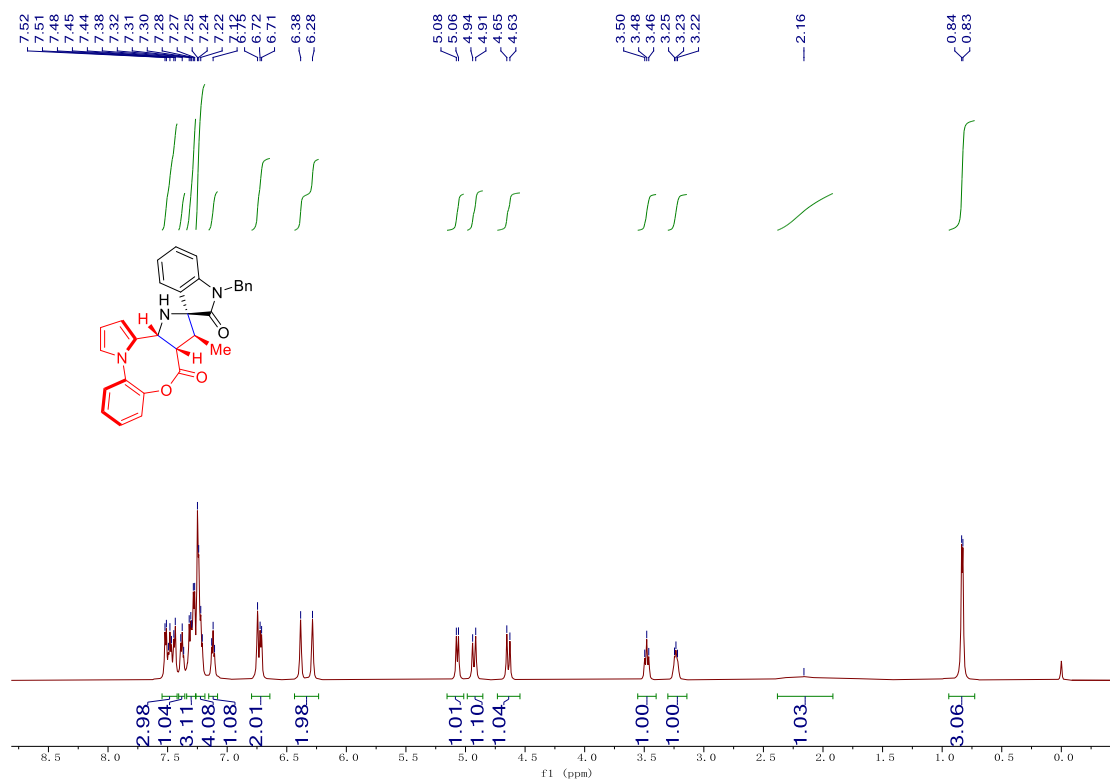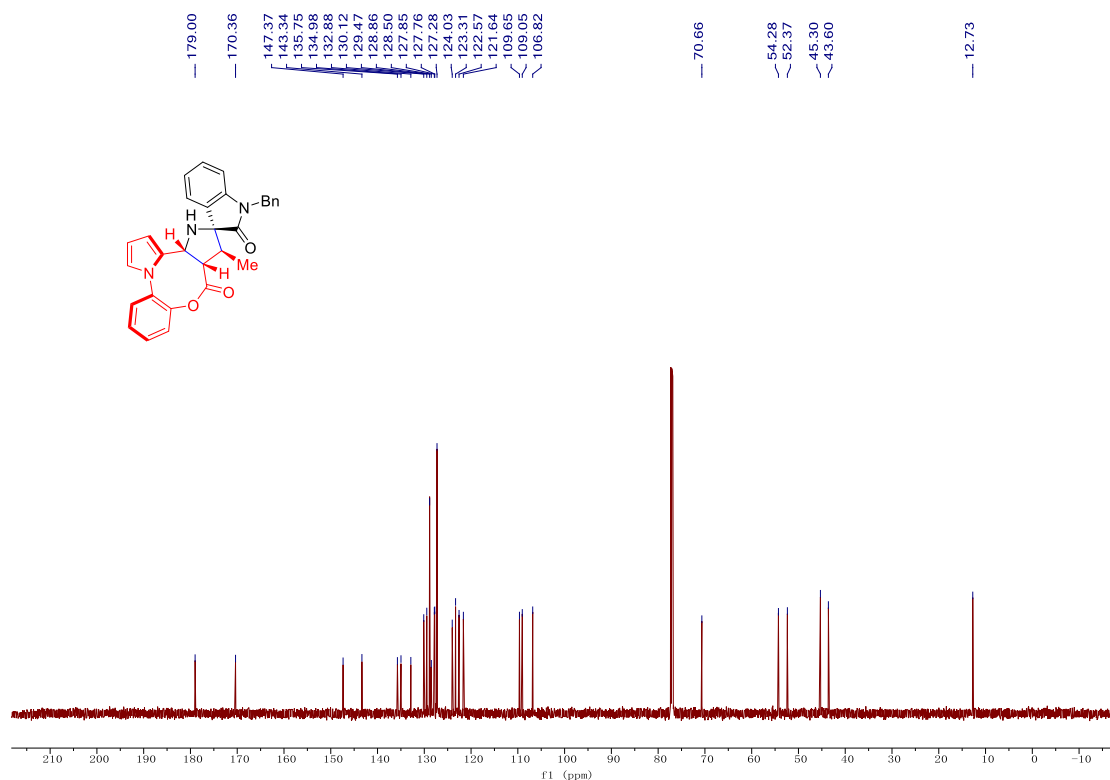

6ao

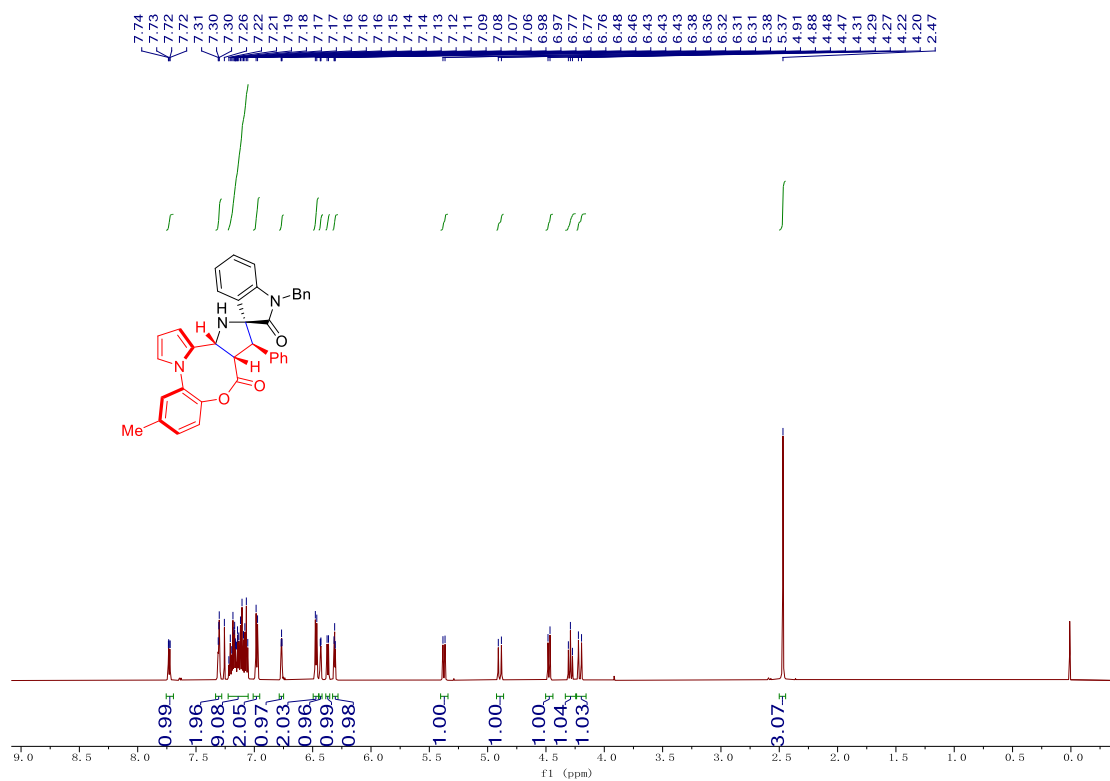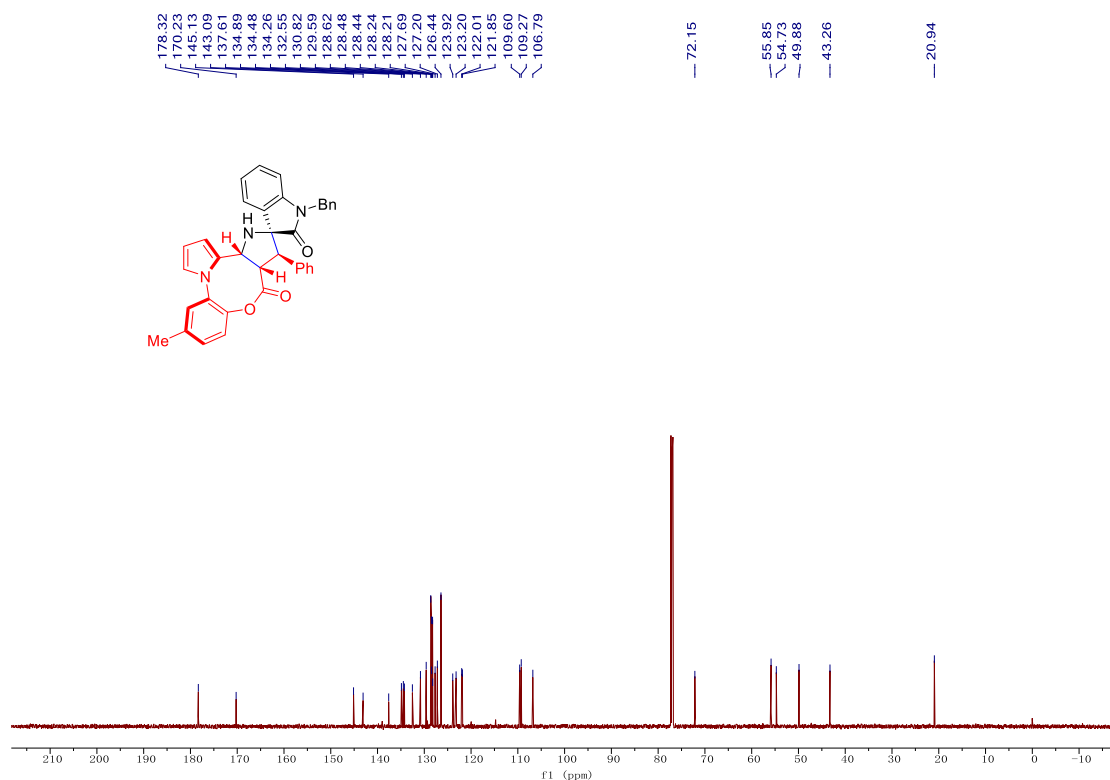

6ap

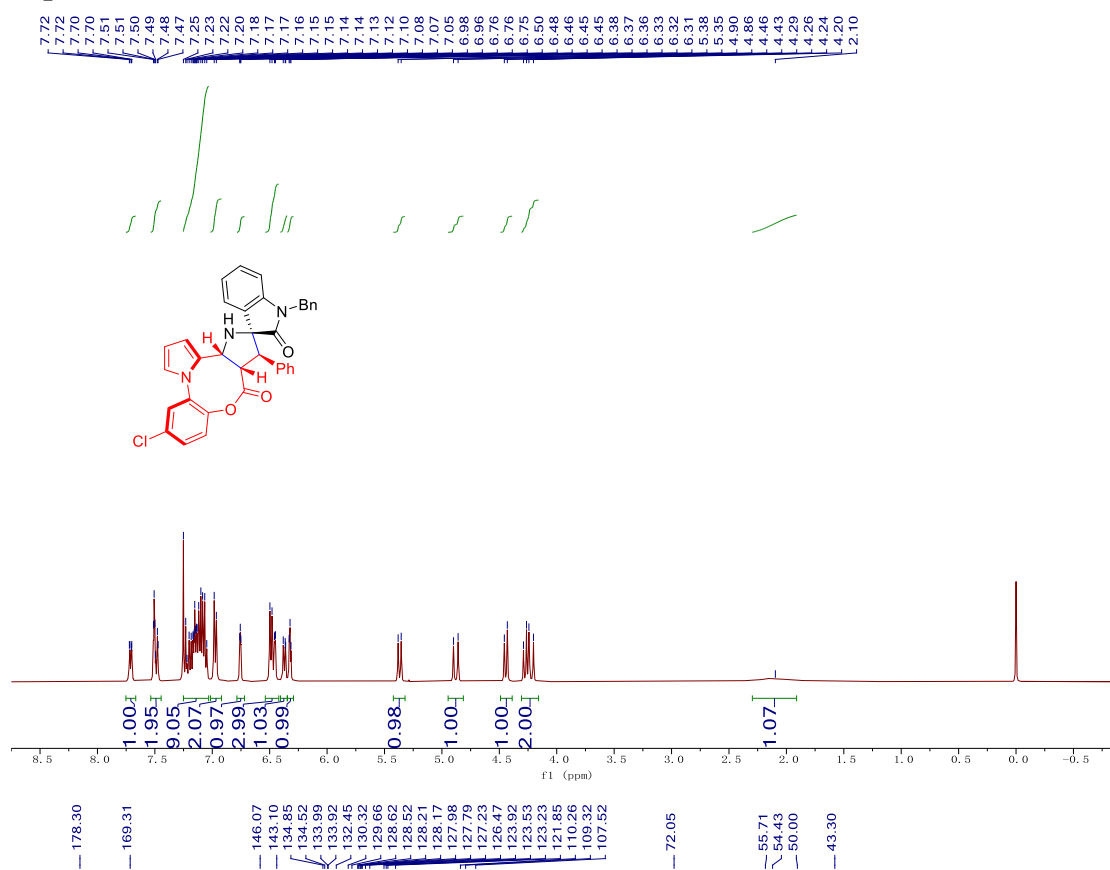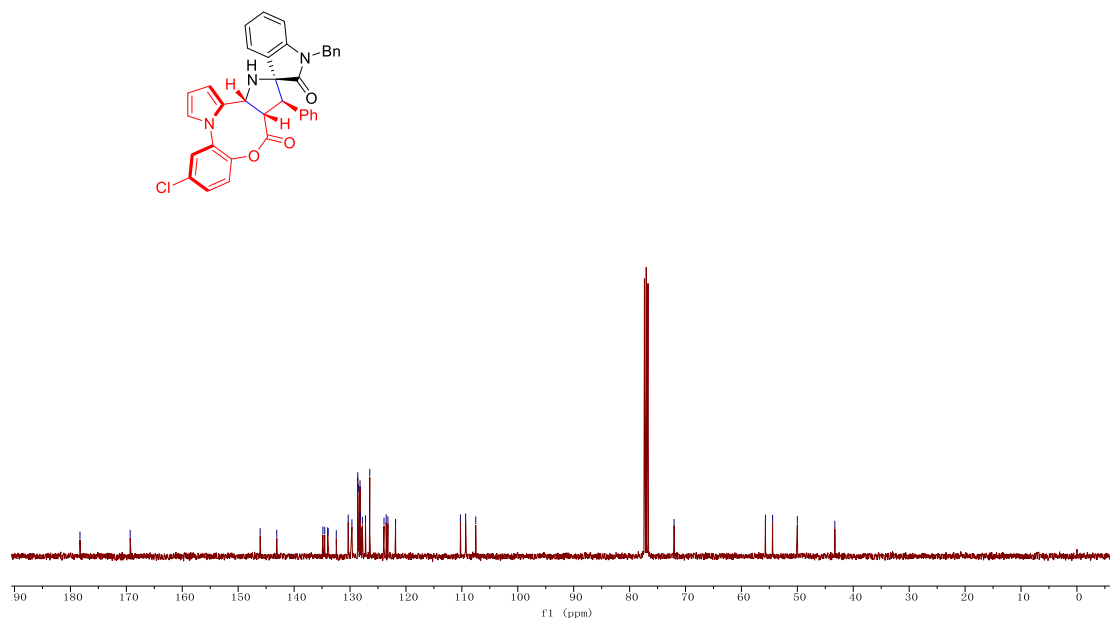

6aq

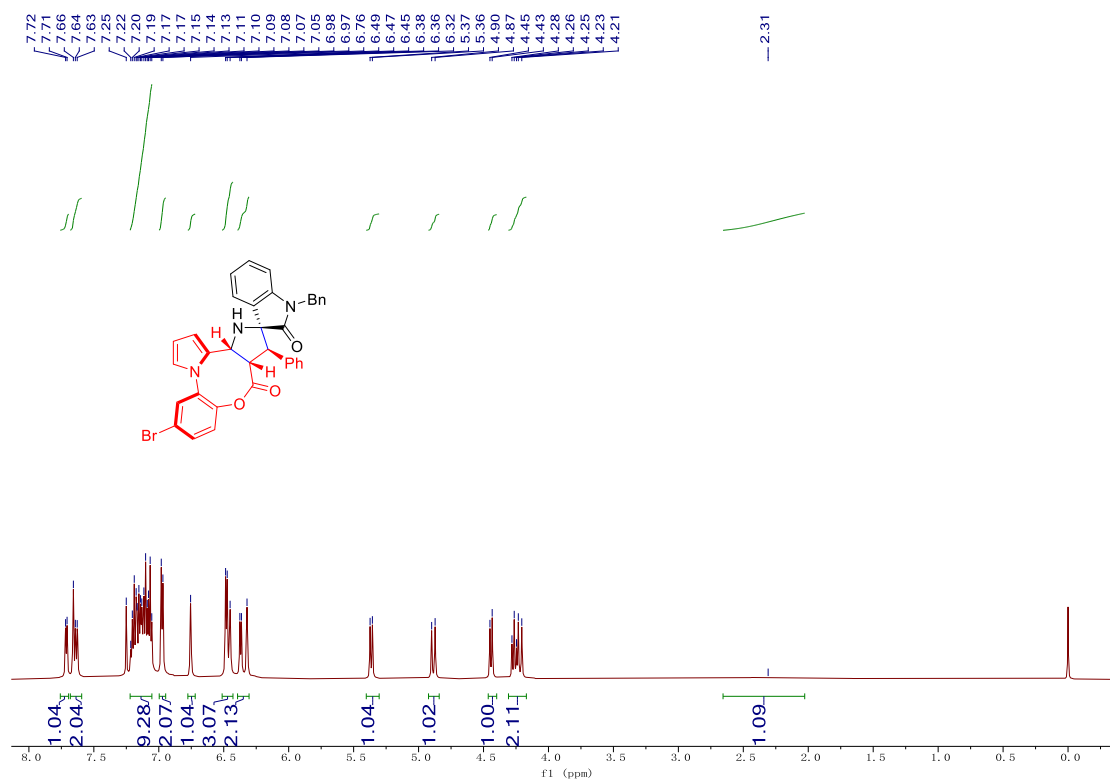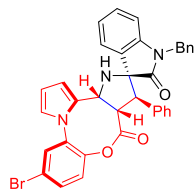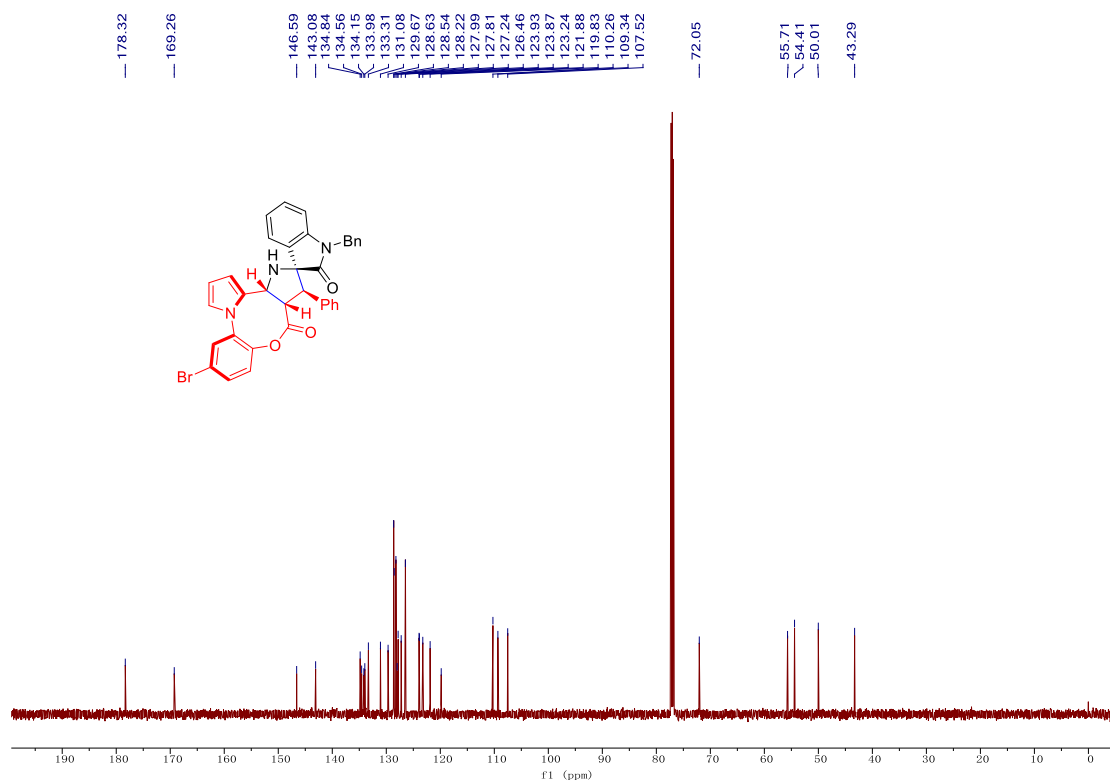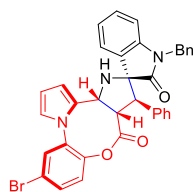

6ar

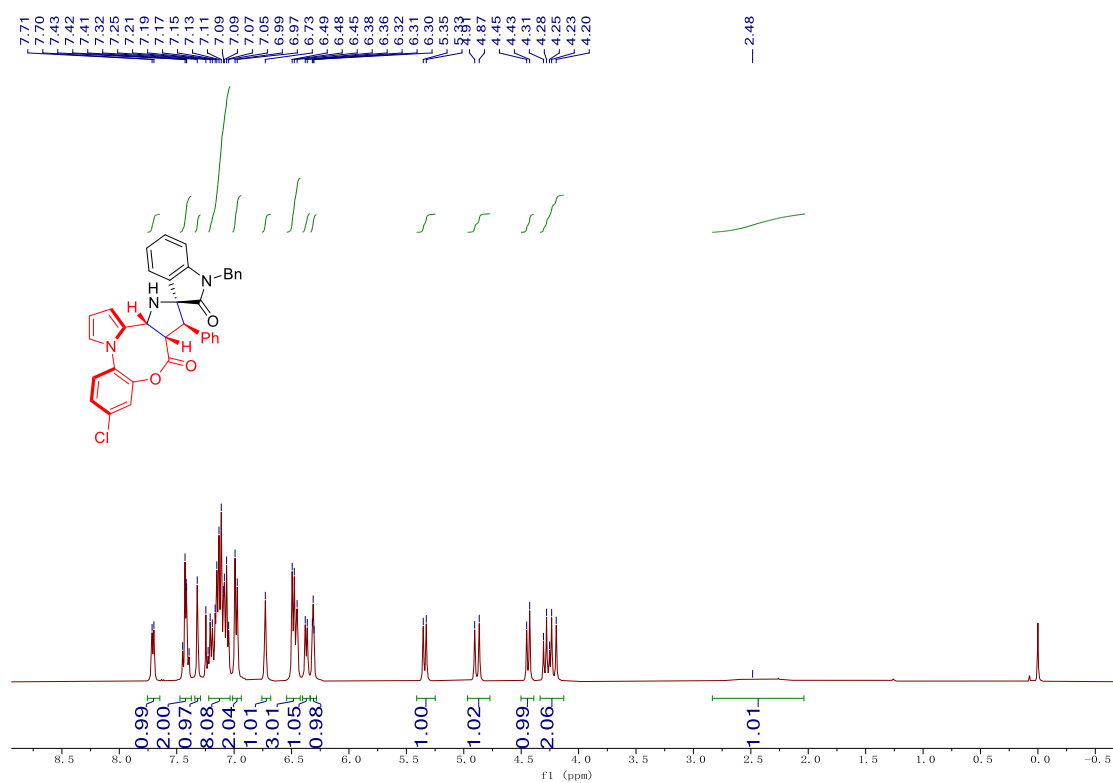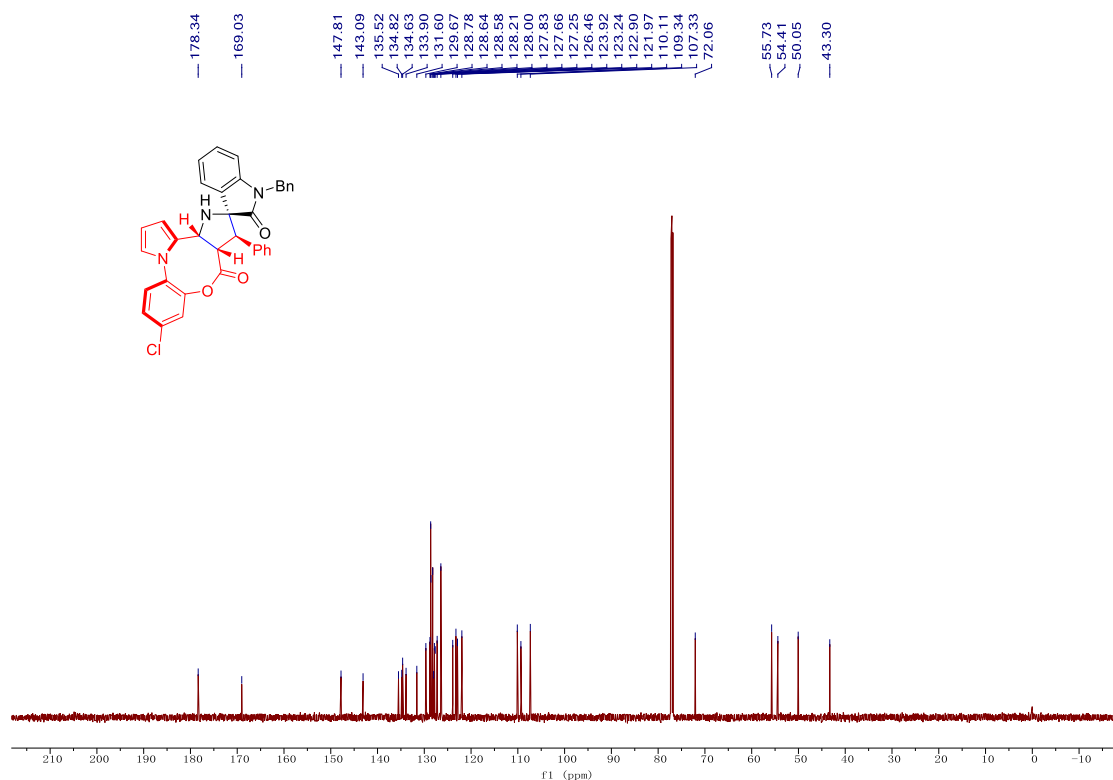

6as

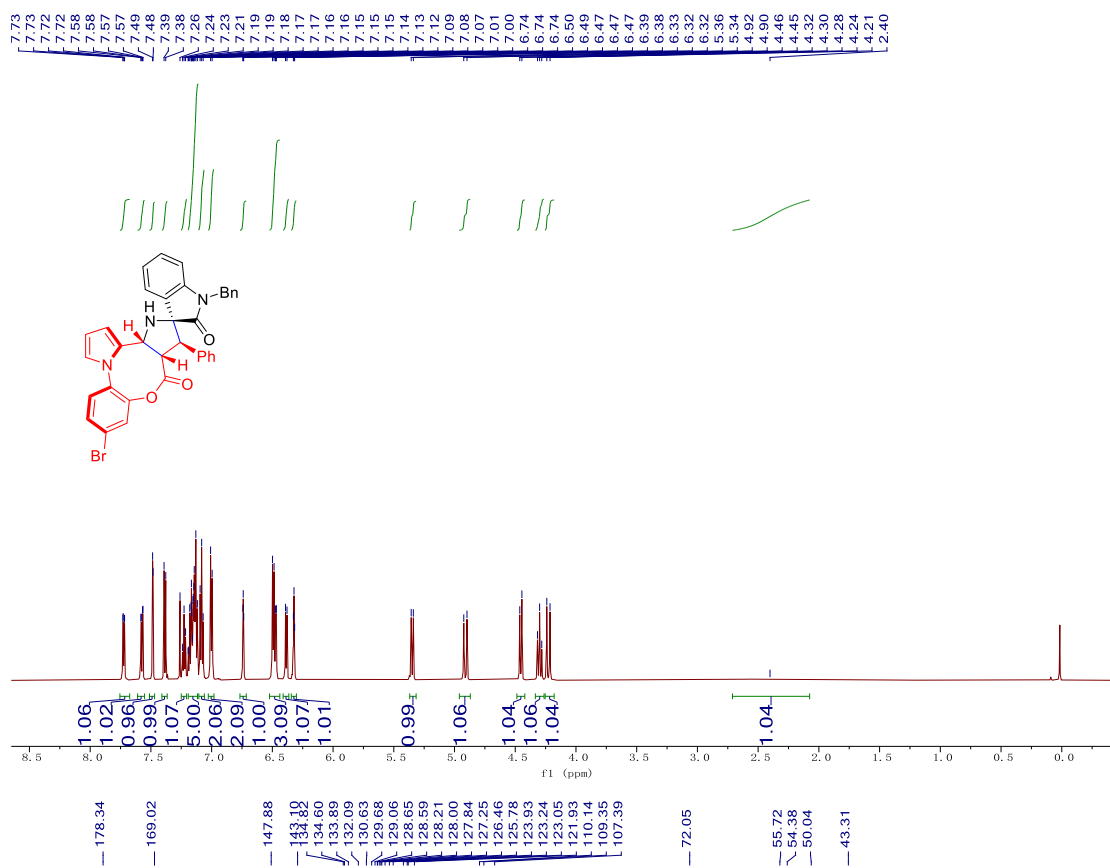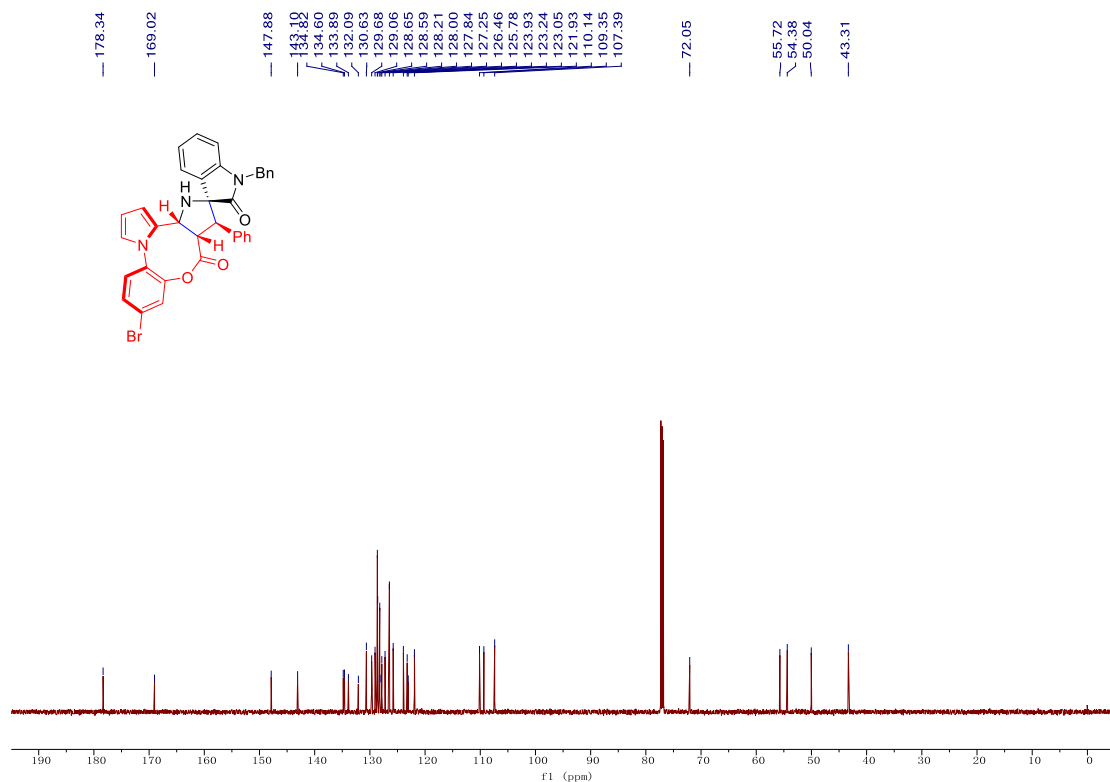

6ba

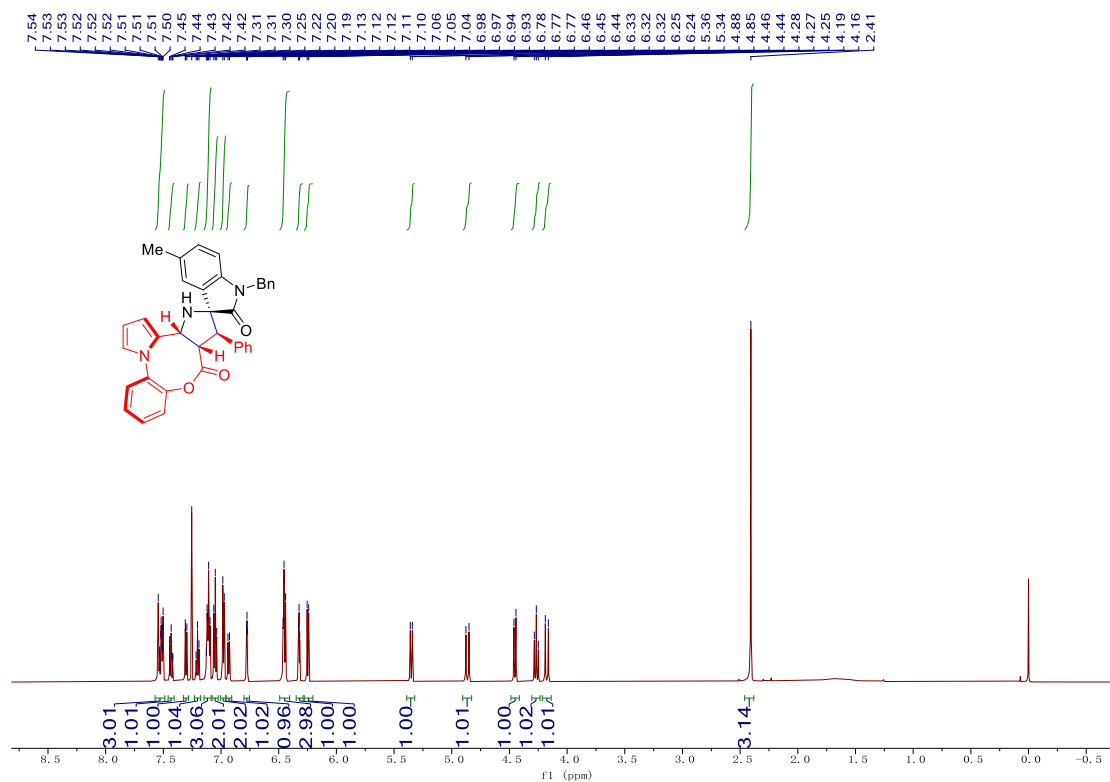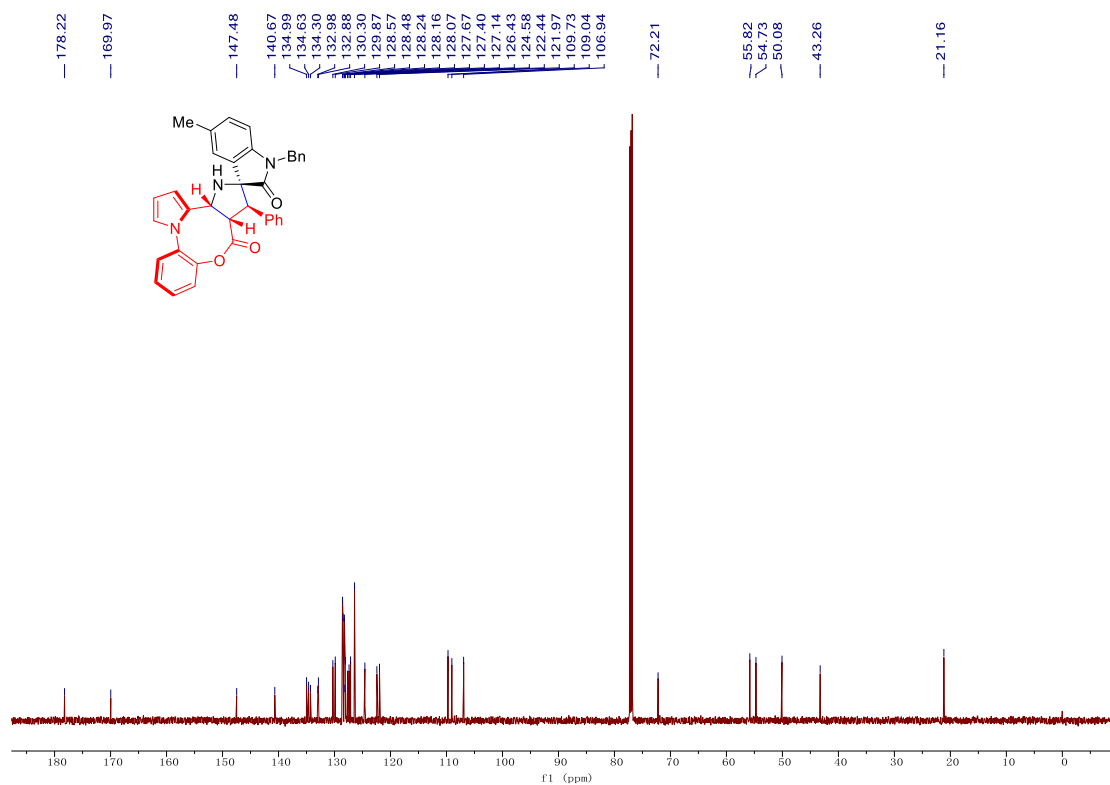

# 6ca

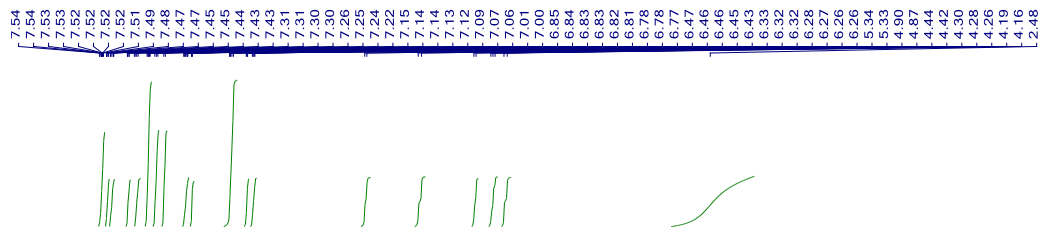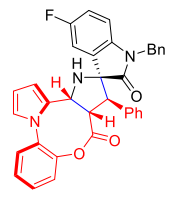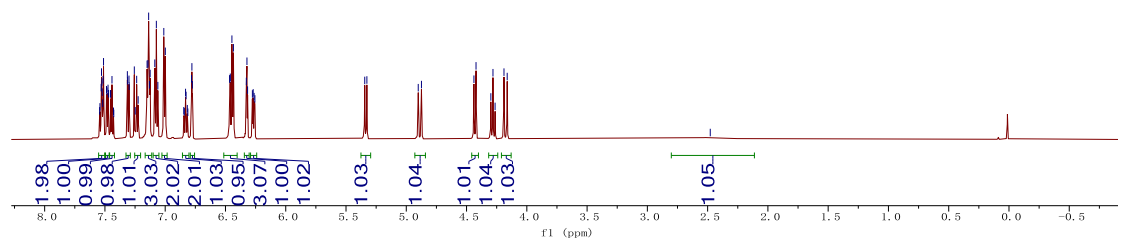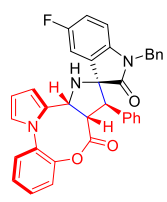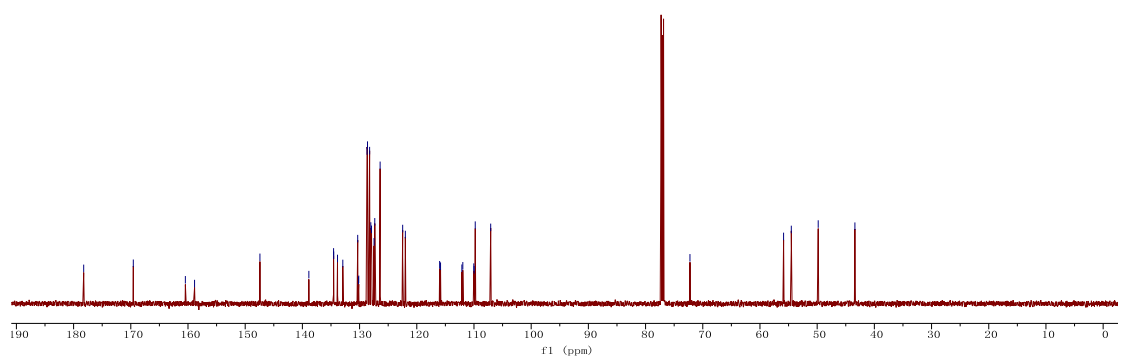



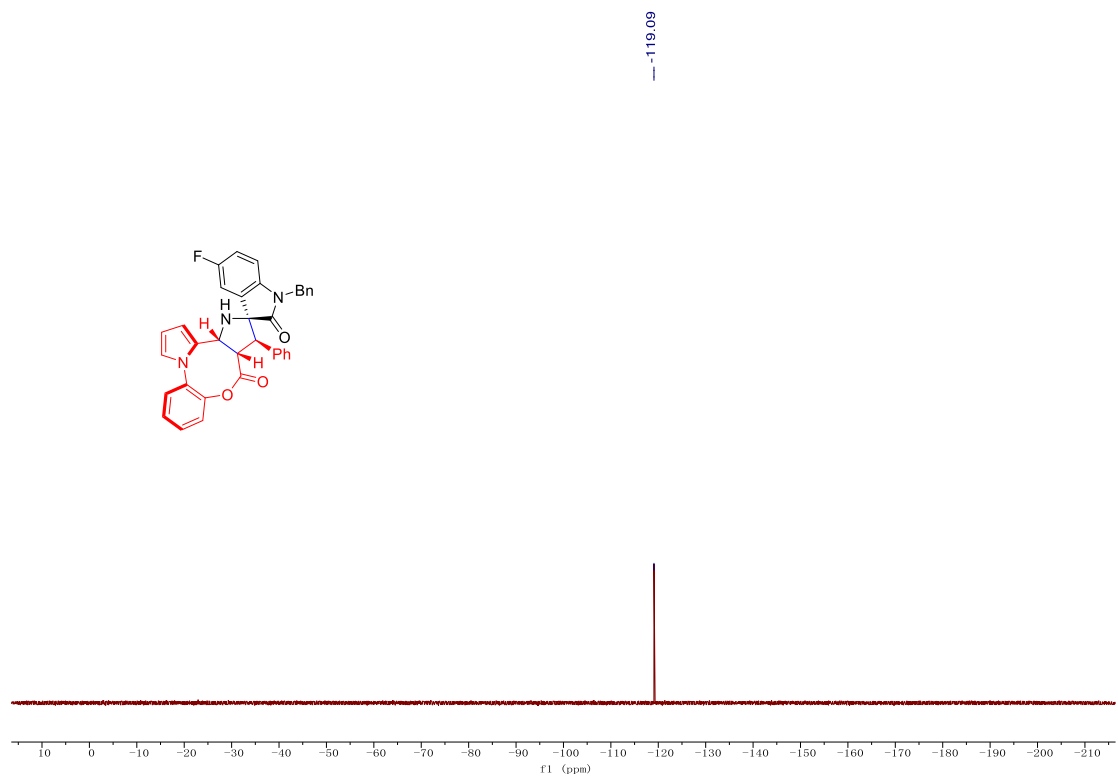

6da

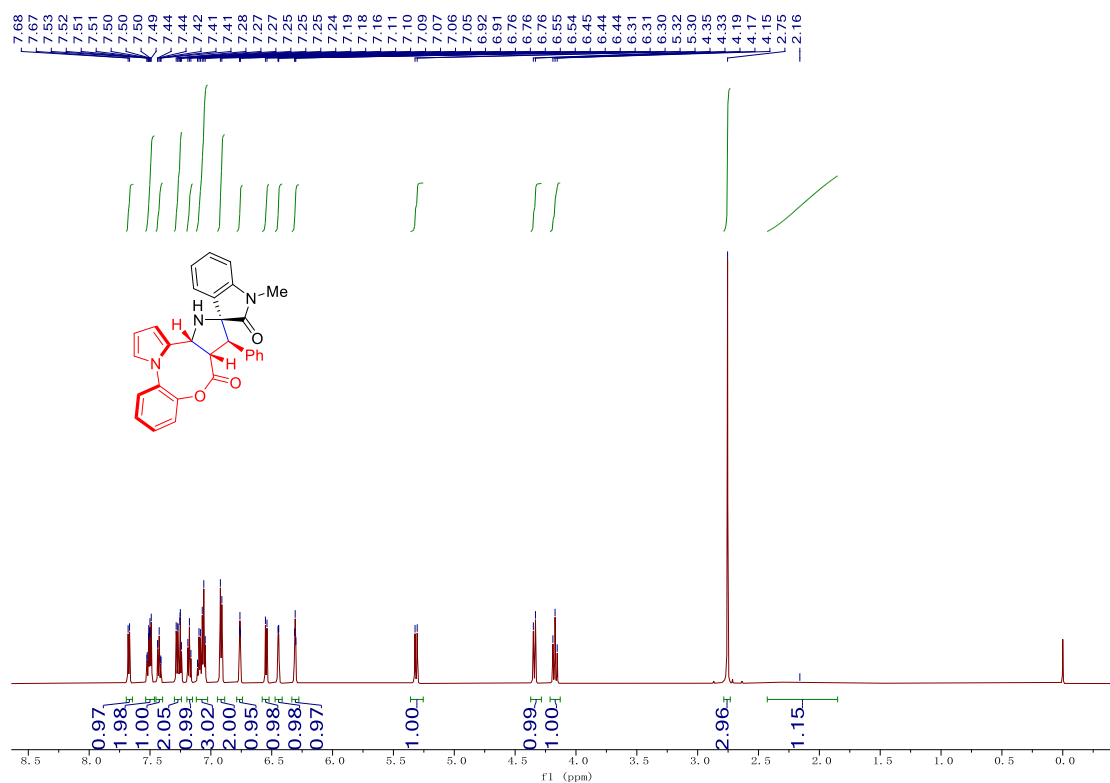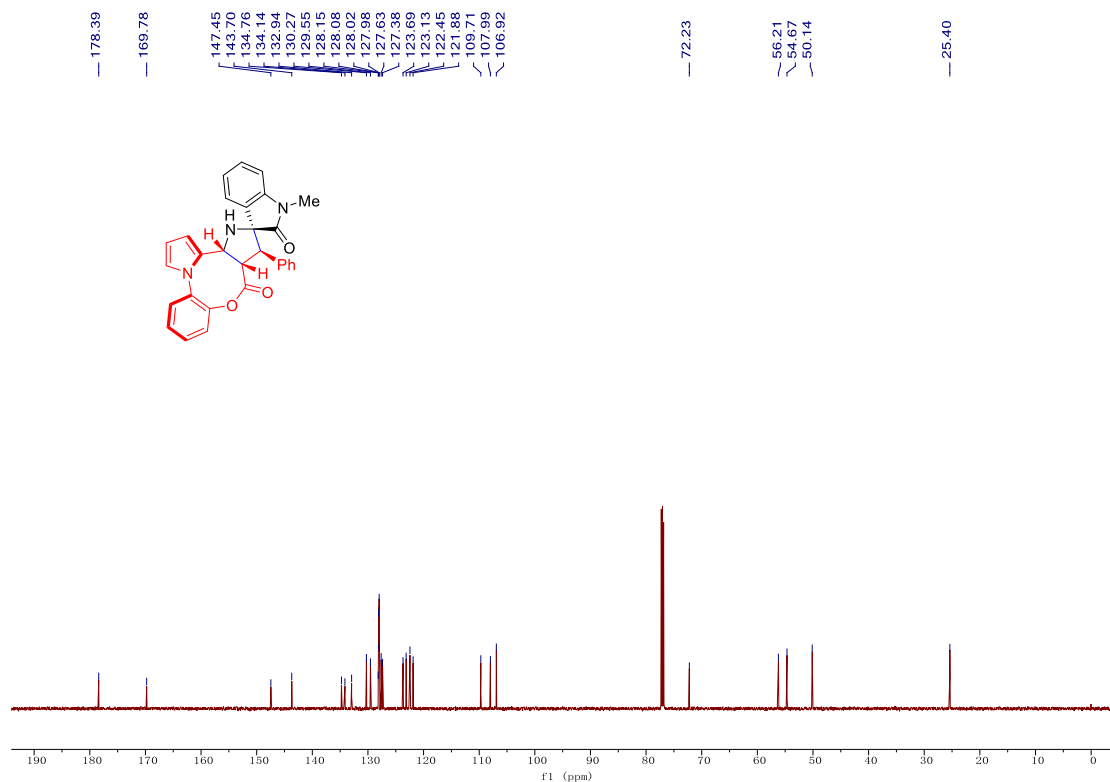

7

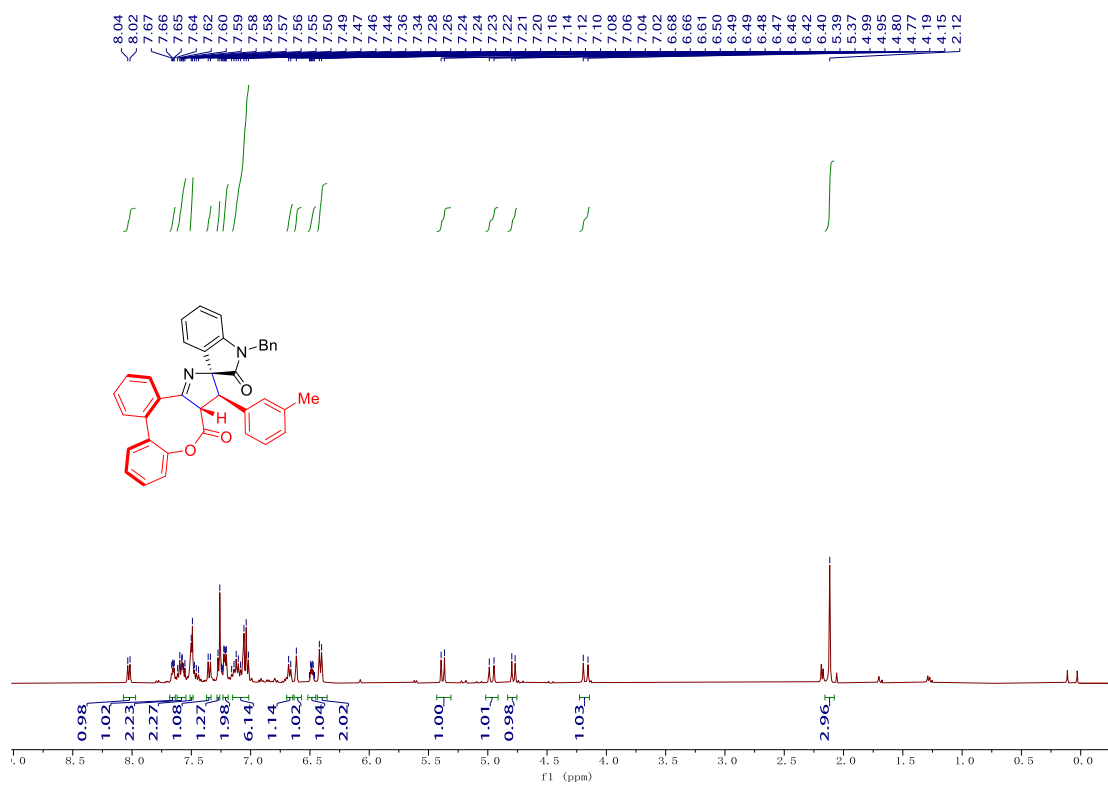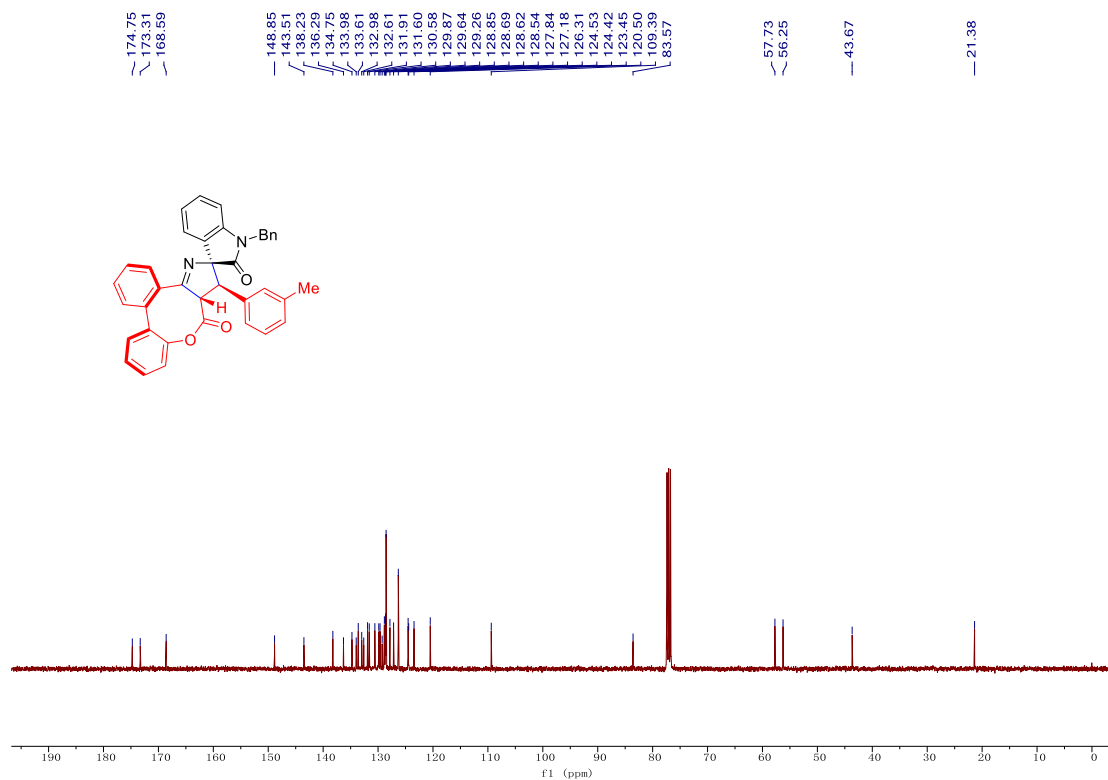

8

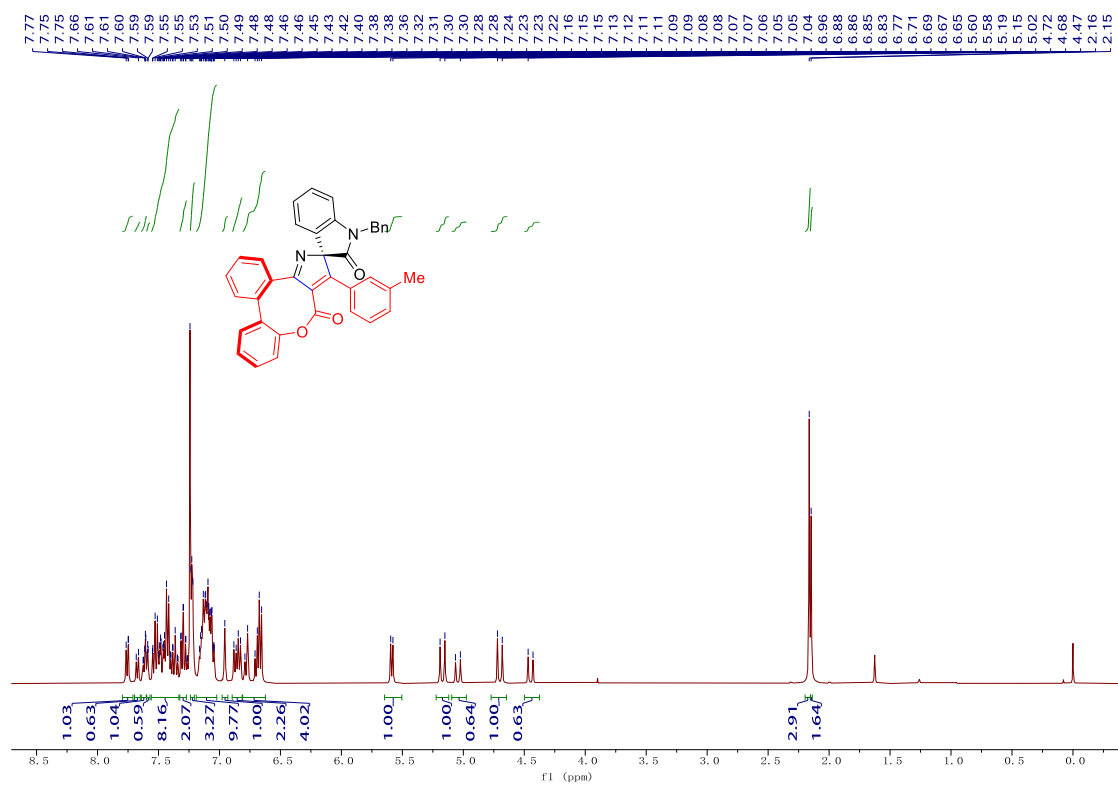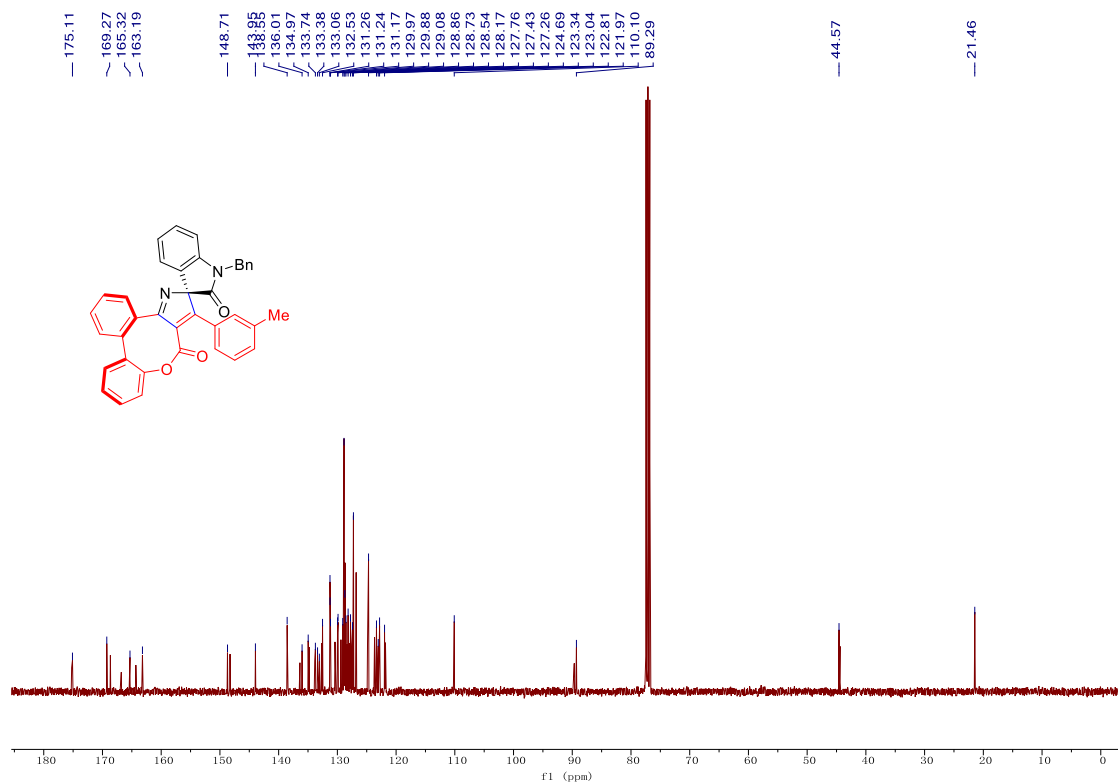

9

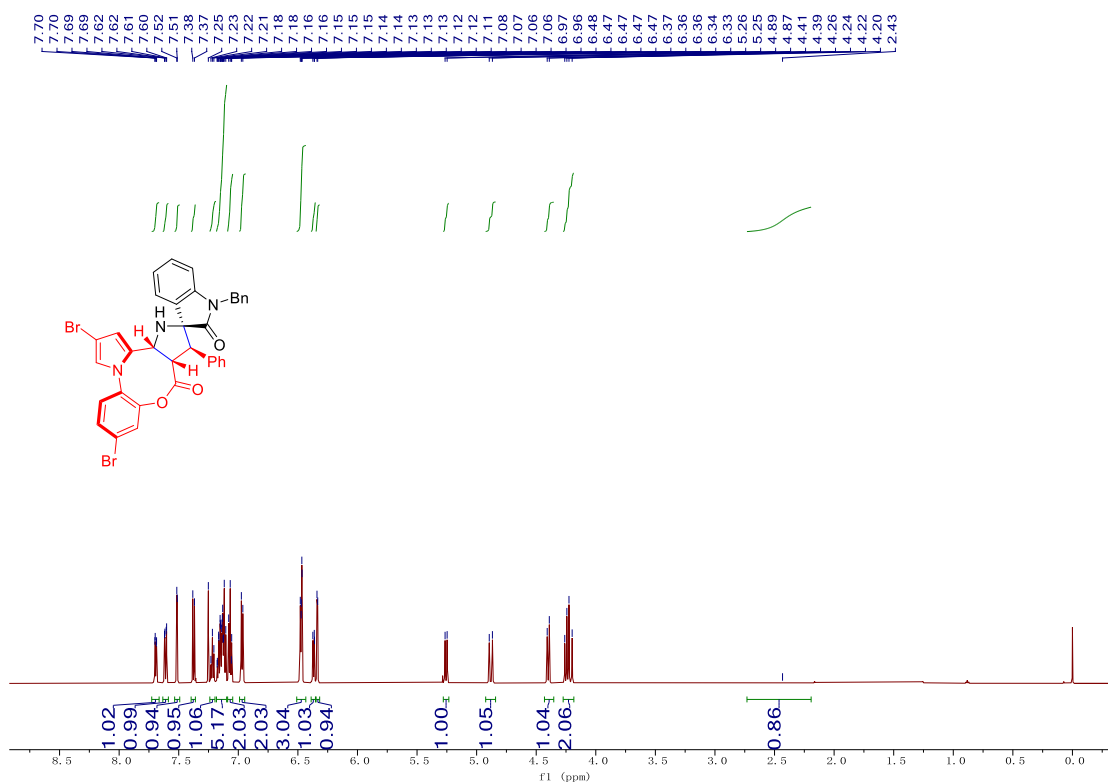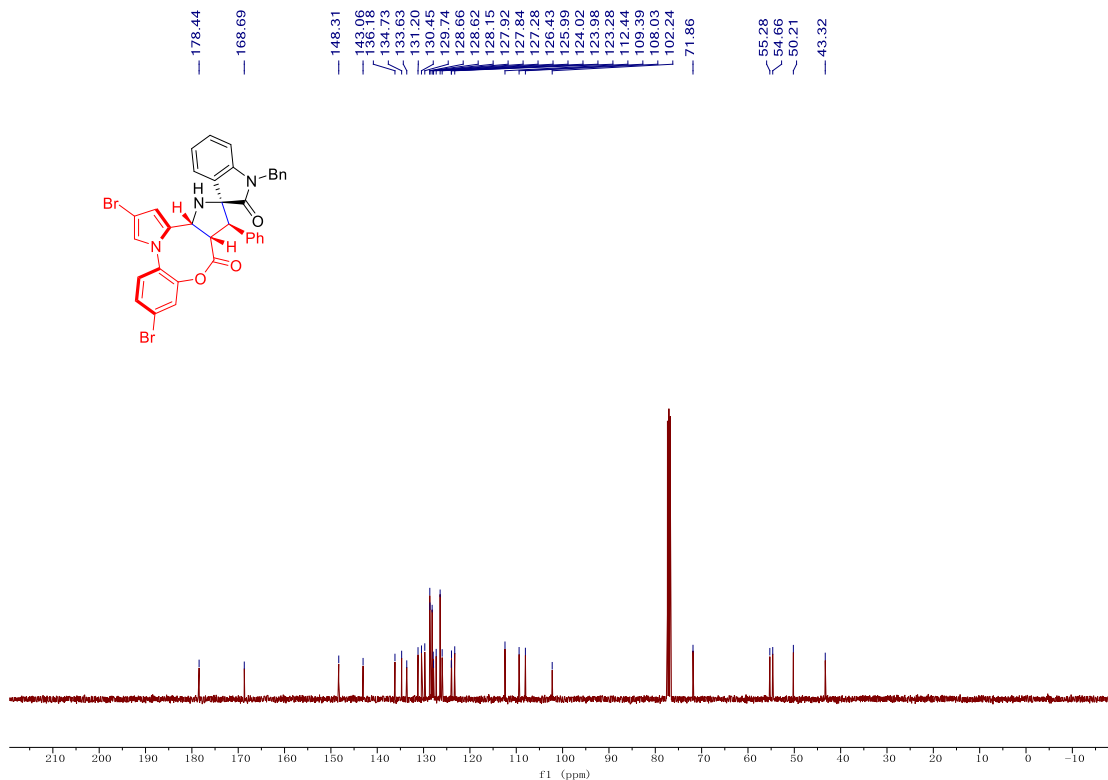

10

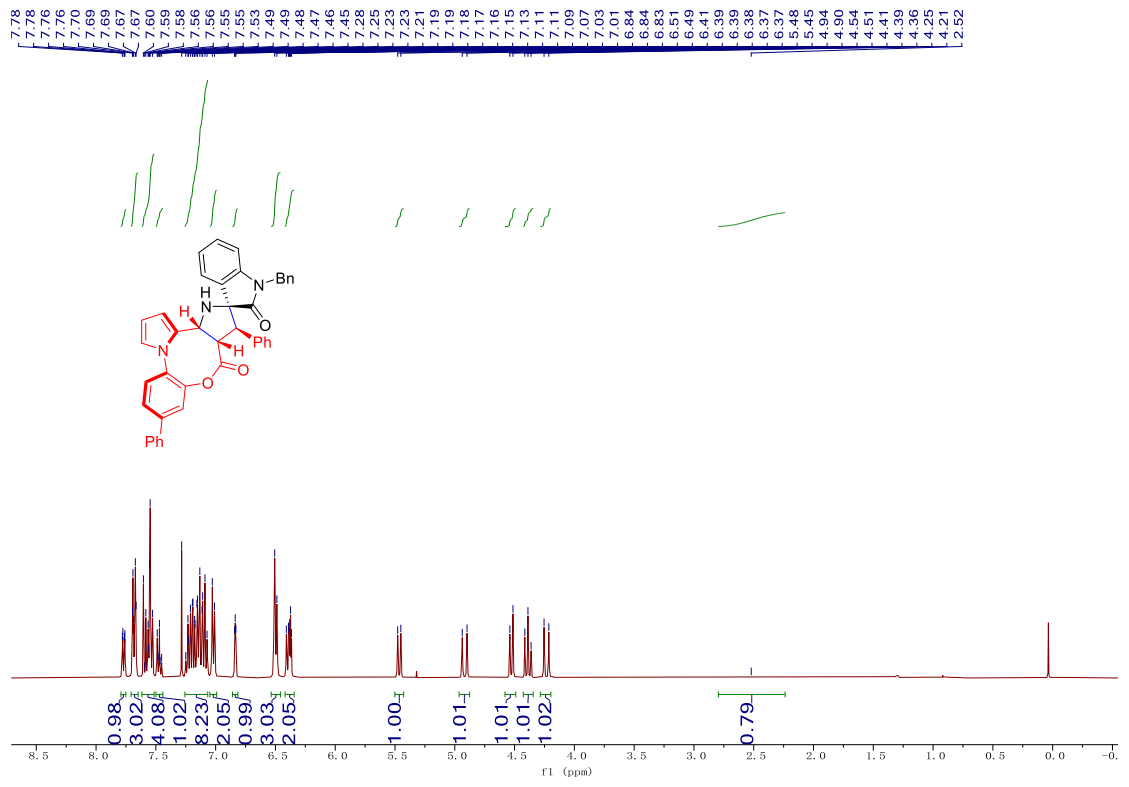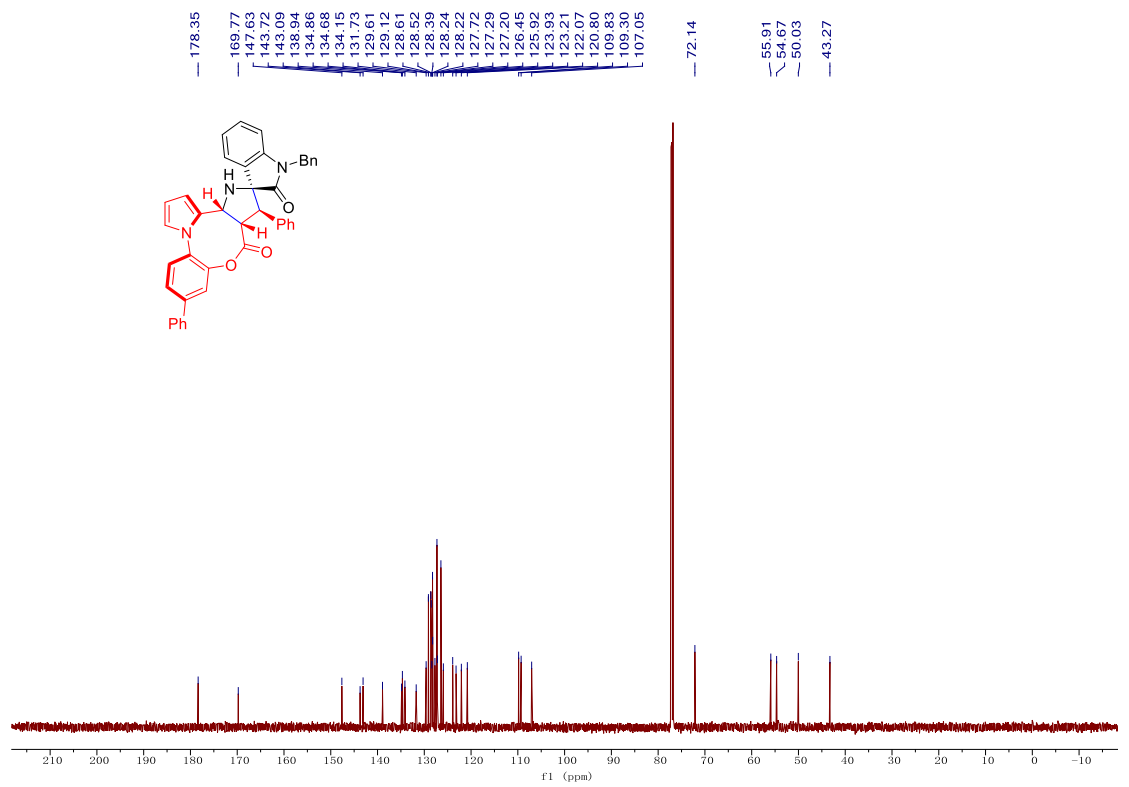

11

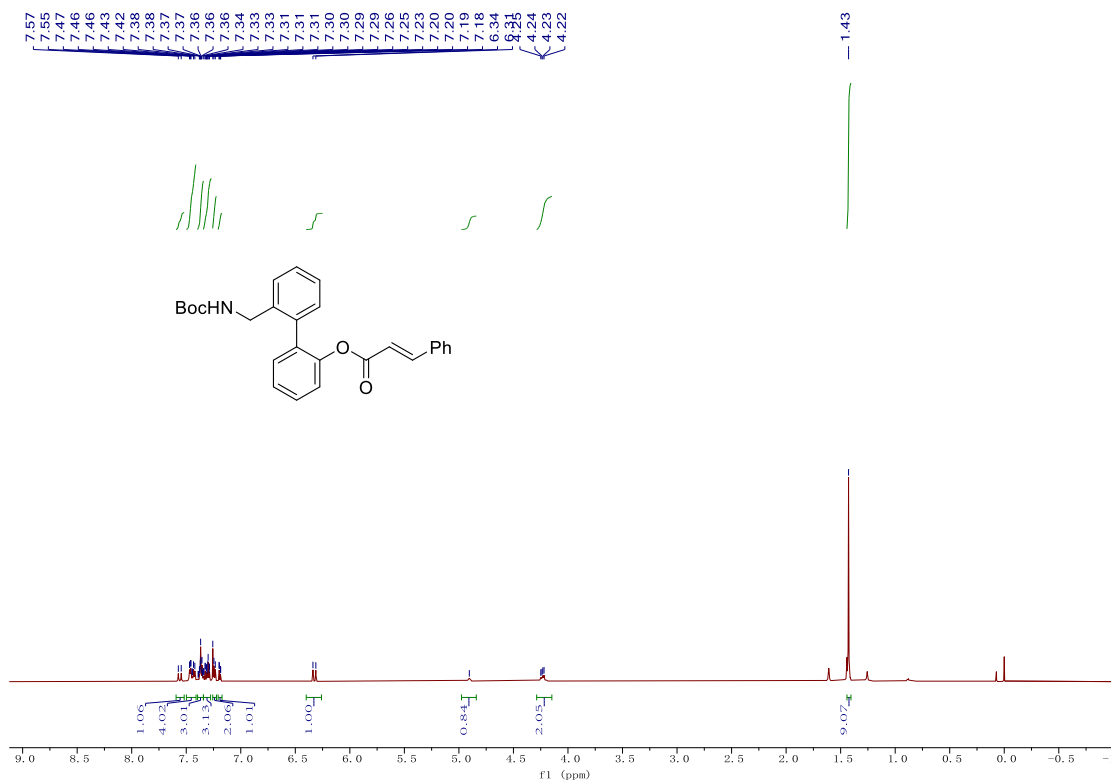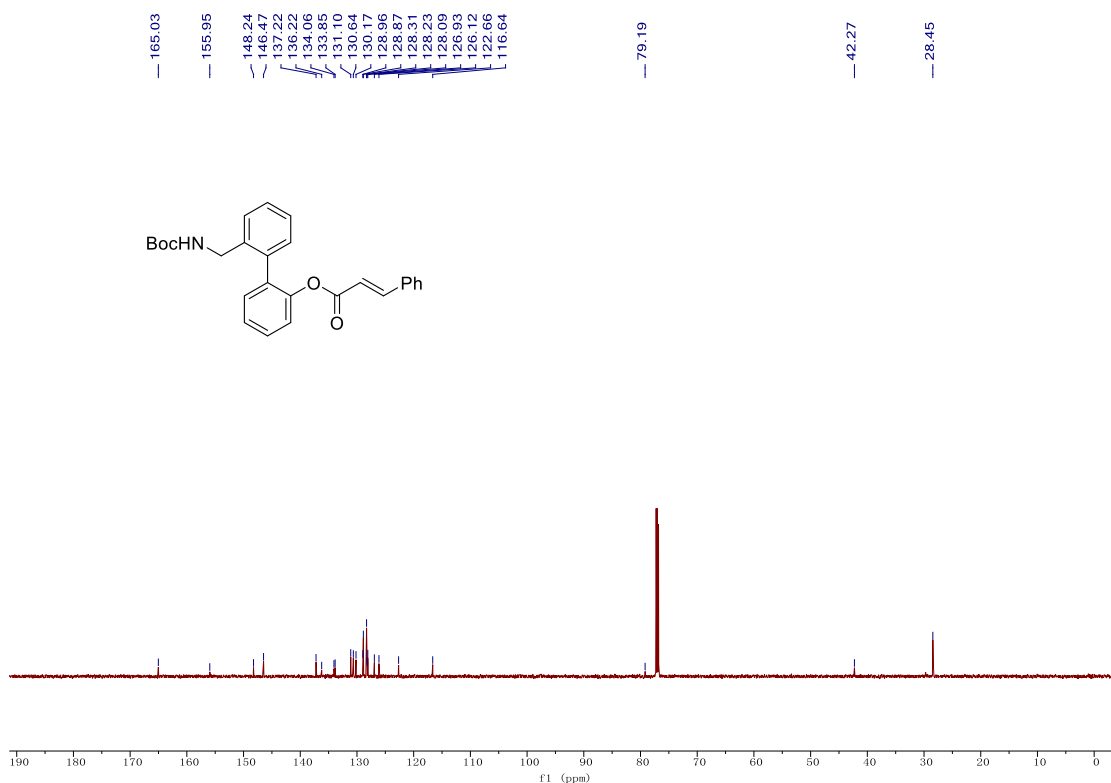

## 8. X-ray crystal structure

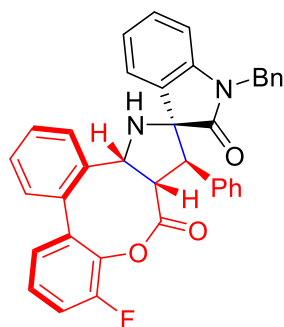

**4am**

≡

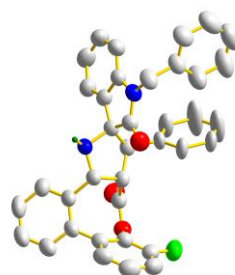

X-ray crystal structure of **4am**

CCDC: 2234268

**Table 1 Crystal data and structure refinement for 1.**

|                                             |                                                                |
|---------------------------------------------|----------------------------------------------------------------|
| Identification code                         | 1                                                              |
| Empirical formula                           | C <sub>41</sub> H <sub>35</sub> FN <sub>2</sub> O <sub>5</sub> |
| Formula weight                              | 654.71                                                         |
| Temperature/K                               | 302.0                                                          |
| Crystal system                              | triclinic                                                      |
| Space group                                 | P1                                                             |
| a/Å                                         | 9.0844(3)                                                      |
| b/Å                                         | 10.3859(4)                                                     |
| c/Å                                         | 18.7463(6)                                                     |
| α/°                                         | 75.426(2)                                                      |
| β/°                                         | 89.765(2)                                                      |
| γ/°                                         | 88.695(2)                                                      |
| Volume/Å <sup>3</sup>                       | 1711.35(10)                                                    |
| Z                                           | 2                                                              |
| ρ <sub>calc</sub> /cm <sup>3</sup>          | 1.271                                                          |
| μ/mm <sup>-1</sup>                          | 0.710                                                          |
| F(000)                                      | 688.0                                                          |
| Crystal size/mm <sup>3</sup>                | 0.27 × 0.24 × 0.22                                             |
| Radiation                                   | CuKα (λ = 1.54178)                                             |
| 2θ range for data collection/°              | 4.87 to 125.132                                                |
| Index ranges                                | -10 ≤ h ≤ 10, -11 ≤ k ≤ 11, -21 ≤ l ≤ 21                       |
| Reflections collected                       | 15849                                                          |
| Independent reflections                     | 9711 [R <sub>int</sub> = 0.0423, R <sub>sigma</sub> = 0.0589]  |
| Data/restraints/parameters                  | 9711/90/898                                                    |
| Goodness-of-fit on F <sup>2</sup>           | 1.094                                                          |
| Final R indexes [I >= 2σ (I)]               | R <sub>1</sub> = 0.0635, wR <sub>2</sub> = 0.1510              |
| Final R indexes [all data]                  | R <sub>1</sub> = 0.0800, wR <sub>2</sub> = 0.1708              |
| Largest diff. peak/hole / e Å <sup>-3</sup> | 0.18/-0.20                                                     |
| Flack parameter                             | 0.02(10)                                                       |



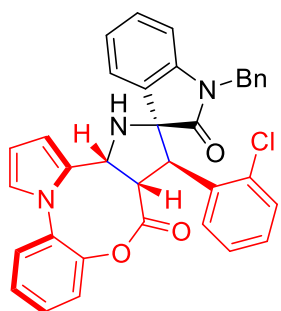

**6ac** (4 d, 80% yield  
> 20:1 dr, 91% ee)

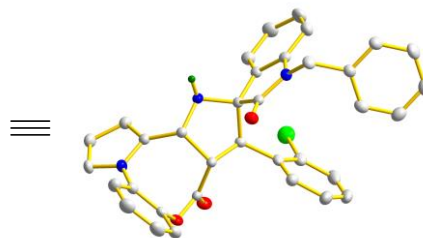

X-ray crystal structure of **6ac**  
CCDC: 2321325

**Table 1 Crystal data and structure refinement for 123.**

|                                             |                                                                               |
|---------------------------------------------|-------------------------------------------------------------------------------|
| Identification code                         | 123                                                                           |
| Empirical formula                           | C <sub>36</sub> H <sub>28</sub> Cl <sub>3</sub> N <sub>3</sub> O <sub>3</sub> |
| Formula weight                              | 656.96                                                                        |
| Temperature/K                               | 120.0                                                                         |
| Crystal system                              | monoclinic                                                                    |
| Space group                                 | P2 <sub>1</sub>                                                               |
| a/Å                                         | 10.2162(3)                                                                    |
| b/Å                                         | 16.7001(4)                                                                    |
| c/Å                                         | 19.1032(5)                                                                    |
| α/°                                         | 90                                                                            |
| β/°                                         | 105.0240(10)                                                                  |
| γ/°                                         | 90                                                                            |
| Volume/Å <sup>3</sup>                       | 3147.82(15)                                                                   |
| Z                                           | 4                                                                             |
| ρ <sub>calc</sub> /cm <sup>3</sup>          | 1.386                                                                         |
| μ/mm <sup>-1</sup>                          | 0.333                                                                         |
| F(000)                                      | 1360.0                                                                        |
| Crystal size/mm <sup>3</sup>                | 0.33 × 0.3 × 0.23                                                             |
| Radiation                                   | MoKα (λ = 0.71073)                                                            |
| 2θ range for data collection/°              | 4.796 to 54.942                                                               |
| Index ranges                                | -13 ≤ h ≤ 13, -21 ≤ k ≤ 21, -24 ≤ l ≤ 23                                      |
| Reflections collected                       | 25485                                                                         |
| Independent reflections                     | 13422 [R <sub>int</sub> = 0.0218, R <sub>sigma</sub> = 0.0365]                |
| Data/restraints/parameters                  | 13422/1/819                                                                   |
| Goodness-of-fit on F <sup>2</sup>           | 1.001                                                                         |
| Final R indexes [I ≥ 2σ (I)]                | R <sub>1</sub> = 0.0359, wR <sub>2</sub> = 0.0850                             |
| Final R indexes [all data]                  | R <sub>1</sub> = 0.0399, wR <sub>2</sub> = 0.0876                             |
| Largest diff. peak/hole / e Å <sup>-3</sup> | 0.32/-0.38                                                                    |
| Flack parameter                             | 0.011(13)                                                                     |
